# Supplementary material for: Potential Therapeutic Targets for Type 2 Diabetes: A Multi-Center Data Analysis Based on Proteomics
Source: Research Square preprint supplement (doi:10.21203/rs.3.rs-5897046/v1), 2025-01-29
Supplement: Supplementary file 1 [file 17304634e96dcaf996178558.xlsx]

## Sheet: Sheet1
Contents
Table S1. Data sources for studied phenotypes
Table S2. Association of the protein with type 2 diabetes: SNP
Table S3. Association of the protein with type 2 diabetes: Mendelian randomization analysis results
Table S4. Association of the protein with type 2 diabetes: Cochran's Q test
Table S5. Association of the protein with type 2 diabetes: MR-Egger intercept test
Table S6. Association of the protein with type 2 diabetes: Reverse MR
Table S7. Association of the protein with type 2 diabetes: Validation processes
Table S8. KEGG 2021 Human
Table S9. DsigDB

## Sheet: Sheet2
Table S1. Data sources for studied phenotypes
Phenotype	Cases	Controls	Study	PMID
Protein	35559	-	Suhre K GWAS	38412862
Type 2 diabetes	71728	369007	FinnGen	NA
Type 2 diabetes	38841	451248	META- analysis	34594039
Eqtl	31684	-	eQTLGen Consortium	34475573
SHBG	368929	-	Ruth, K. S	32042192

## Sheet: Sheet3
Table S2. Association of the protein with type 2 diabetes: SNP
Protein	SNP	A1	A2	Beta	SE	P-Value	Eaf	Samplesize	R2	F
SIGLEC12	rs10401247	A	G	-0.3042	0.016914	2.548e-72	0.06847	35372	0.00906176	323.446
SIGLEC12	rs10419792	G	A	-0.1005	0.008521	4.168e-32	0.48092	35366	0.00391796	139.1
SIGLEC12	rs10421191	G	A	-0.0821	0.012462	4.462e-11	0.13336	35372	0.00122552	43.3997
SIGLEC12	rs10421215	T	A	0.0872	0.009092	8.749e-22	0.32284	35363	0.0025944	91.9792
SIGLEC12	rs10423027	G	A	-0.121	0.008622	9.713e-45	0.4115	35372	0.00553712	196.938
SIGLEC12	rs1048328	A	G	-0.1098	0.017286	2.126e-10	0.06427	35356	0.00113987	40.3451
SIGLEC12	rs11084075	CGTGTCTCTAACTTGCTTTGTA	CGTGTCTCTAACTTGCTTTGTT	0.1947	0.012745	1.094e-52	0.12896	35366	0.00655556	233.361
SIGLEC12	rs111757169	T	C	-0.1347	0.021821	6.705e-10	0.03909	35368	0.00107624	38.1032
SIGLEC12	rs112064222	T	C	0.1291	0.018649	4.429e-12	0.05382	35370	0.00135306	47.92
SIGLEC12	rs112735728	C	T	0.6947	0.025152	6.394e-168	0.03053	35372	0.0211117	762.825
SIGLEC12	rs112852764	A	G	-0.1517	0.023765	1.732e-10	0.03376	35372	0.00115063	40.7447
SIGLEC12	rs113581628	TCACCTG	T	0.2863	0.009477	1.671e-200	0.26954	35372	0.0251523	912.591
SIGLEC12	rs11394995	AAAAAAAAAAAA	AAAAAAAAAA	0.9679	0.013983	1e-200	0.05476	35372	0.119297	4791.11
SIGLEC12	rs11665698	C	A	0.0558	0.009183	1.231e-09	0.31114	35357	0.00104321	36.9211
SIGLEC12	rs11667325	A	G	-0.1176	0.009306	1.312e-36	0.29918	35372	0.00449441	159.685
SIGLEC12	rs11668533	A	G	0.0867	0.008543	3.377e-24	0.44192	35372	0.00290332	102.989
SIGLEC12	rs11669019	G	T	0.0616	0.008707	1.499e-12	0.39468	35368	0.00141319	50.0495
SIGLEC12	rs116863711	G	A	-0.1854	0.02848	7.528e-11	0.02253	35373	0.0011966	42.3755
SIGLEC12	rs117025461	CTGGAGCGTAGTATCTGGATCAGT	CTGGAGCGTAGCATCTGGATCAGT	0.1153	0.016221	1.175e-12	0.07402	35356	0.00142699	50.5218
SIGLEC12	rs117317527	C	T	0.2076	0.02485	6.592e-17	0.03096	35363	0.00196968	69.7875
SIGLEC12	rs117391293	G	A	0.2591	0.0347	8.218e-14	0.0146	35365	0.00157405	55.7508
SIGLEC12	rs117496758	A	G	-0.1393	0.019185	3.849e-13	0.05174	35369	0.00148836	52.7174
SIGLEC12	rs117606240	G	A	0.5192	0.044199	7.321e-32	0.01006	35371	0.00388603	137.981
SIGLEC12	rs117706066	AAAATAAATAAATAAATAAATAAATAAA	AAAATAAATAAATAAATAAATAAATAAG	0.1113	0.014805	5.584e-14	0.09086	35360	0.00159576	56.5131
SIGLEC12	rs117963795	A	G	0.0675	0.010245	4.44e-11	0.22582	35364	0.001226	43.4069
SIGLEC12	rs118060933	T	C	0.2112	0.034144	6.188e-10	0.01568	35364	0.00108076	38.2591
SIGLEC12	rs12459891	T	C	0.1037	0.013508	1.631e-14	0.11129	35353	0.00166428	58.932
SIGLEC12	rs12461017	A	G	0.0492	0.008712	1.628e-08	0.40563	35372	0.000900831	31.8911
SIGLEC12	rs12610545	G	A	0.2222	0.03192	3.377e-12	0.01809	35370	0.00136815	48.4549
SIGLEC12	rs12983058	T	G	0.0945	0.009405	9.402e-24	0.29406	35359	0.00284713	100.954
SIGLEC12	rs138593008	G	A	0.4634	0.030717	2.004e-51	0.02026	35363	0.00639469	227.578
SIGLEC12	rs138816179	T	C	0.7223	0.031933	2.784e-113	0.01835	35369	0.0142592	511.601
SIGLEC12	rs138894449	G	A	-0.1068	0.017797	1.96e-09	0.06443	35363	0.00101732	36.0101
SIGLEC12	rs139682761	A	G	-0.175	0.024449	8.2e-13	0.0319	35371	0.00144637	51.2306
SIGLEC12	rs139747310	C	A	-0.1747	0.021028	9.729e-17	0.04271	35366	0.00194786	69.0185
SIGLEC12	rs140110353	CACACACACACACAC	CACACACAC	0.1964	0.01976	2.807e-23	0.04609	35358	0.00278618	98.7835
SIGLEC12	rs140987580	G	A	0.6046	0.019919	1e-200	0.04666	35367	0.0253884	921.248
SIGLEC12	rs142003578	A	G	0.2568	0.034389	8.176e-14	0.01653	35357	0.00157468	55.7605
SIGLEC12	rs143778243	ACCCAAG	GCCCAAG	0.4028	0.042844	5.374e-21	0.01019	35368	0.0024929	88.3841
SIGLEC12	rs144774392	A	G	-0.179	0.015369	2.373e-31	0.08275	35373	0.00382015	135.641
SIGLEC12	rs145077706	A	G	0.2216	0.036552	1.34e-09	0.0136	35360	0.00103837	36.753
SIGLEC12	rs146205373	AAT	A	-0.0631	0.009245	8.756e-12	0.30364	35369	0.00131538	46.5822
SIGLEC12	rs146864876	G	A	-0.1623	0.024619	4.325e-11	0.02966	35371	0.0012272	43.4582
SIGLEC12	rs147969639	T	C	0.1367	0.019728	4.231e-12	0.05025	35371	0.00135561	48.0116
SIGLEC12	rs148192269	C	G	0.1765	0.026778	4.361e-11	0.02627	35365	0.00122695	43.4419
SIGLEC12	rs148610266	A	G	0.3788	0.020333	1.829e-77	0.04662	35373	0.00971639	347.05
SIGLEC12	rs148783636	C	T	-0.1778	0.028828	6.93e-10	0.02282	35366	0.00107444	38.0373
SIGLEC12	rs149106454	T	C	-0.1645	0.029097	1.572e-08	0.02217	35370	0.000902834	31.9603
SIGLEC12	rs149400361	C	G	0.1581	0.026433	2.215e-09	0.02659	35362	0.00101064	35.7723
SIGLEC12	rs151034940	T	C	-0.1486	0.023567	2.873e-10	0.03317	35356	0.00112325	39.7562
SIGLEC12	rs1618440	T	C	0.0747	0.009784	2.261e-14	0.2503	35353	0.00164614	58.2886
SIGLEC12	rs16983059	G	A	0.197	0.015742	6.218e-36	0.0799	35372	0.00440793	156.599
SIGLEC12	rs16985422	T	C	0.1224	0.021063	6.21e-09	0.04367	35361	0.000954077	33.7674
SIGLEC12	rs1710384	A	T	-0.0712	0.010794	4.212e-11	0.19393	35360	0.00122899	43.5081
SIGLEC12	rs17658926	A	G	-0.0593	0.010392	1.155e-08	0.21149	35362	0.000919972	32.5602
SIGLEC12	rs17780009	A	G	0.0667	0.010026	2.88e-11	0.23304	35369	0.00124977	44.256
SIGLEC12	rs183237225	A	G	0.3122	0.031292	1.924e-23	0.01945	35370	0.00280636	99.5347
SIGLEC12	rs1833786	A	G	0.1367	0.008687	8.546e-56	0.39013	35367	0.00695295	247.613
SIGLEC12	rs184729287	T	A	-0.0614	0.008818	3.339e-12	0.36887	35364	0.00136912	48.481
SIGLEC12	rs185254	A	C	0.438	0.008399	1e-200	0.17932	35366	0.0714057	2719.37
SIGLEC12	rs1875425	T	G	0.0807	0.014569	3.042e-08	0.09142	35368	0.000866763	30.6805
SIGLEC12	rs187930	A	C	0.0881	0.015175	6.416e-09	0.08702	35359	0.000952315	33.7031
SIGLEC12	rs190502932	T	A	0.5796	0.041996	2.499e-43	0.01039	35360	0.00535791	190.466
SIGLEC12	rs2075803	G	A	0.0634	0.008548	1.196e-13	0.47868	35359	0.00155337	55.0079
SIGLEC12	rs2084761	T	C	-0.148	0.012588	6.484e-32	0.12995	35369	0.00389308	138.225
SIGLEC12	rs2411329	G	A	0.0623	0.008701	8.078e-13	0.39165	35365	0.00144755	51.2641
SIGLEC12	rs2455064	T	C	-0.4319	0.03467	1.275e-35	0.01546	35362	0.00436938	155.179
SIGLEC12	rs2569477	A	G	-0.073	0.00847	6.773e-18	0.47397	35364	0.00209607	74.277
SIGLEC12	rs2569482	G	A	0.0828	0.009311	5.982e-19	0.30261	35362	0.00223132	79.0758
SIGLEC12	rs2659080	A	G	0.0866	0.010302	4.249e-17	0.21687	35353	0.0019948	70.6591
SIGLEC12	rs266853	C	T	0.0912	0.010232	4.964e-19	0.22038	35358	0.00224185	79.4409
SIGLEC12	rs2691215	T	A	0.061	0.00889	6.795e-12	0.35533	35362	0.00132966	47.0795
SIGLEC12	rs28436300	T	A	-0.1714	0.02042	4.713e-17	0.0443	35370	0.00198797	70.4507
SIGLEC12	rs2867975	C	A	-0.0903	0.013171	7.085e-12	0.11968	35365	0.00132736	47.0017
SIGLEC12	rs2898691	T	C	-0.0552	0.008765	3.026e-10	0.38631	35366	0.00112022	39.6597
SIGLEC12	rs3009	A	G	0.0527	0.008658	1.153e-09	0.39927	35367	0.00104649	37.0477
SIGLEC12	rs34203482	T	C	-0.1145	0.016235	1.756e-12	0.0719	35363	0.00140458	49.7373
SIGLEC12	rs34338963	C	A	0.0569	0.008598	3.653e-11	0.45812	35348	0.00123745	43.793
SIGLEC12	rs34491457	A	G	0.1723	0.025104	6.721e-12	0.02971	35351	0.00133078	47.1043
SIGLEC12	rs34528093	C	T	-0.0616	0.009205	2.2e-11	0.30678	35363	0.00126478	44.7805
SIGLEC12	rs34980236	T	C	0.1766	0.029779	3.022e-09	0.02106	35363	0.000993529	35.1671
SIGLEC12	rs35372578	G	A	0.1169	0.013037	3.052e-19	0.12224	35351	0.00226927	80.3987
SIGLEC12	rs35792692	TT	T	-0.0531	0.009175	7.148e-09	0.31072	35361	0.000946327	33.4929
SIGLEC12	rs35931837	T	C	-0.18	0.012544	1.066e-46	0.13054	35373	0.00578736	205.896
SIGLEC12	rs3745396	A	G	0.1375	0.009994	4.516e-43	0.23883	35369	0.00532336	189.279
SIGLEC12	rs3745523	T	C	-0.0746	0.009569	6.406e-15	0.27308	35358	0.00171598	60.7743
SIGLEC12	rs3829654	C	G	-0.0542	0.008595	2.859e-10	0.43795	35365	0.00112317	39.7633
SIGLEC12	rs3829658	A	G	-0.5736	0.006993	1e-200	0.28148	35371	0.159815	6727.7
SIGLEC12	rs4284742	G	A	0.0871	0.00993	1.767e-18	0.2402	35371	0.00217044	76.9331
SIGLEC12	rs4289096	C	A	-0.1241	0.010978	1.243e-29	0.18082	35372	0.00359974	127.783
SIGLEC12	rs4341854	A	C	0.1045	0.012652	1.46e-16	0.13183	35369	0.00192511	68.2165
SIGLEC12	rs4507016	A	G	0.0581	0.009523	1.053e-09	0.28316	35372	0.00105121	37.2203
SIGLEC12	rs45441795	G	C	-0.1532	0.025609	2.199e-09	0.02704	35376	0.00101061	35.7856
SIGLEC12	rs4801848	A	G	0.055	0.00916	1.92e-09	0.31113	35355	0.00101869	36.0504
SIGLEC12	rs4801849	G	A	0.0519	0.008953	6.766e-09	0.34585	35356	0.000949559	33.6026
SIGLEC12	rs4802733	A	C	0.066	0.01147	8.702e-09	0.16306	35357	0.000935576	33.1083
SIGLEC12	rs4802788	T	G	-0.0923	0.008924	4.529e-25	0.34937	35367	0.0030156	106.969
SIGLEC12	rs4802839	T	C	-0.1311	0.008554	5.046e-53	0.45232	35369	0.00659735	234.878
SIGLEC12	rs4802847	A	G	-0.0694	0.008896	6.145e-15	0.35019	35365	0.00171794	60.8562
SIGLEC12	rs4802894	C	G	-0.0555	0.008536	7.933e-11	0.47214	35369	0.00119381	42.272
SIGLEC12	rs57351606	A	G	0.1828	0.01684	1.883e-27	0.06926	35371	0.00332029	117.827
SIGLEC12	rs6070	A	T	0.0875	0.009269	3.739e-21	0.30901	35359	0.00251395	89.1099
SIGLEC12	rs60865738	T	C	0.1377	0.011967	1.222e-30	0.14774	35367	0.00372972	132.395
SIGLEC12	rs61063927	C	T	0.0738	0.009438	5.304e-15	0.28892	35372	0.00172561	61.1404
SIGLEC12	rs61732348	C	T	0.2311	0.022682	2.227e-24	0.03671	35358	0.00292736	103.804
SIGLEC12	rs61736486	T	C	-0.1815	0.019115	2.199e-21	0.0499	35371	0.00254245	90.153
SIGLEC12	rs61743147	A	T	1.0806	0.013654	1e-200	0.05661	35370	0.150442	6263.05
SIGLEC12	rs61998206	T	C	-0.1777	0.019651	1.525e-19	0.04997	35370	0.00230658	81.7676
SIGLEC12	rs62113142	G	A	0.0607	0.008728	3.531e-12	0.3799	35357	0.00136609	48.3641
SIGLEC12	rs62113336	A	G	-0.1463	0.020544	1.068e-12	0.04478	35372	0.00143165	50.7101
SIGLEC12	rs62113341	T	C	-0.1751	0.010974	2.61e-57	0.17865	35372	0.00714608	254.576
SIGLEC12	rs62114259	A	G	-0.1083	0.015712	5.468e-12	0.07934	35369	0.00134149	47.5083
SIGLEC12	rs62116173	C	T	-0.1295	0.00971	1.41e-40	0.25741	35369	0.0050038	177.859
SIGLEC12	rs62116199	A	C	-0.1437	0.023607	1.149e-09	0.03295	35371	0.00104648	37.0516
SIGLEC12	rs6509545	C	G	-0.1875	0.012521	1.066e-50	0.13226	35371	0.00629988	224.233
SIGLEC12	rs71358836	G	A	-0.1182	0.019647	1.786e-09	0.04918	35368	0.00102232	36.1924
SIGLEC12	rs71358855	C	T	-0.1271	0.021678	4.546e-09	0.04012	35374	0.000970838	34.3738
SIGLEC12	rs7247412	C	T	-0.0775	0.009462	2.6e-16	0.27834	35372	0.00189302	67.0831
SIGLEC12	rs7249762	CTCCCTTCTA	TTCCCTTCTA	-0.0746	0.008971	9.152e-17	0.34311	35357	0.00195196	69.1467
SIGLEC12	rs7251705	G	A	0.2297	0.033613	8.278e-12	0.01705	35363	0.00131882	46.6963
SIGLEC12	rs7252881	A	G	-0.1099	0.008567	1.149e-37	0.45598	35364	0.00463191	164.556
SIGLEC12	rs7255378	C	T	-0.0853	0.009365	8.352e-20	0.29138	35353	0.0023412	82.9579
SIGLEC12	rs7258755	A	G	-0.1353	0.018852	7.119e-13	0.05288	35366	0.00145433	51.5058
SIGLEC12	rs7259649	A	G	0.0503	0.008606	5.075e-09	0.44468	35372	0.000964838	34.1593
SIGLEC12	rs73045911	G	C	0.1096	0.016719	5.549e-11	0.06987	35349	0.00121422	42.971
SIGLEC12	rs73049688	G	A	-0.141	0.017163	2.119e-16	0.0658	35370	0.00190453	67.4881
SIGLEC12	rs73051055	A	T	-0.0973	0.010665	7.283e-20	0.19943	35362	0.00234826	83.2299
SIGLEC12	rs73051357	T	C	-0.162	0.026424	8.747e-10	0.02605	35371	0.00106151	37.5845
SIGLEC12	rs73052804	T	C	0.4297	0.0159	7.364e-161	0.07747	35369	0.0202319	730.318
SIGLEC12	rs73053016	T	C	0.0915	0.013513	1.277e-11	0.11298	35361	0.00129495	45.8473
SIGLEC12	rs73053086	A	G	0.2322	0.020502	9.78e-30	0.04618	35362	0.00361429	128.265
SIGLEC12	rs73054902	T	C	-0.0863	0.011849	3.262e-13	0.15185	35365	0.00149773	53.0437
SIGLEC12	rs73066867	A	T	0.4714	0.022673	5.211e-96	0.03668	35366	0.0120753	432.252
SIGLEC12	rs73577345	G	A	0.2101	0.021241	4.551e-23	0.04114	35369	0.00275854	97.8313
SIGLEC12	rs75011734	A	G	-0.1419	0.024627	8.319e-09	0.03107	35372	0.000937723	33.1984
SIGLEC12	rs75181361	C	T	-0.162	0.018657	3.845e-18	0.05579	35374	0.00212685	75.3914
SIGLEC12	rs75253143	AGGGGGAA	AGGGGGAG	0.443	0.013872	1e-200	0.1048	35366	0.0280283	1019.78
SIGLEC12	rs75453224	A	G	-0.0707	0.012304	9.142e-09	0.13819	35361	0.00093286	33.0158
SIGLEC12	rs75853494	C	A	0.1144	0.010823	4.097e-26	0.19333	35372	0.00314867	111.72
SIGLEC12	rs77665677	T	C	-0.1591	0.025109	2.352e-10	0.03005	35371	0.00113381	40.1474
SIGLEC12	rs79254320	A	G	-0.1346	0.016994	2.369e-15	0.06518	35365	0.00177074	62.7299
SIGLEC12	rs79506121	C	T	0.7506	0.024499	1e-200	0.031	35369	0.0258536	938.633
SIGLEC12	rs802583	C	T	-0.0508	0.009271	4.267e-08	0.30071	35362	0.000848338	30.0227
SIGLEC12	rs802584	C	G	-0.0902	0.013681	4.306e-11	0.11155	35364	0.00122767	43.4663
SIGLEC12	rs8106673	A	T	0.1776	0.010257	3.651e-67	0.21346	35370	0.00840513	299.792
SIGLEC12	rs8110287	T	C	-0.1608	0.016181	2.865e-23	0.07303	35374	0.00278398	98.7499
SIGLEC12	rs8111973	T	C	0.1484	0.014594	2.731e-24	0.09378	35367	0.0029151	103.394
SIGLEC12	rs8113099	A	G	0.1079	0.01021	4.193e-26	0.22591	35369	0.00314774	111.678
STAT3	rs111494201	A	G	-0.1182	0.018303	1.061e-10	0.05268	35371	0.00117769	41.7029
STAT3	rs111919119	T	C	-0.1273	0.018586	7.422e-12	0.04891	35371	0.00132453	46.9095
STAT3	rs112616358	C	T	-0.1042	0.017983	6.863e-09	0.05277	35371	0.000948313	33.5727
STAT3	rs11650429	T	C	0.076	0.010638	9.055e-13	0.17372	35370	0.00144094	51.0367
STAT3	rs12150483	A	G	0.0495	0.008866	2.361e-08	0.30205	35370	0.000880516	31.1695
STAT3	rs34631785	CAA	CA	-0.0585	0.008227	1.154e-12	0.43587	35361	0.00142785	50.5597
STAT3	rs35490951	C	A	-0.0814	0.014534	2.133e-08	0.08588	35371	0.000886025	31.3656
STAT3	rs4793078	TTGTCTCAAAAAAAAAAAAAAATCTT	TAGTCTCAAAAAAAAAAAAAAATCTT	0.0559	0.008849	2.668e-10	0.30756	35361	0.00112725	39.9035
STAT3	rs4796791	C	T	0.1541	0.008237	4.286e-78	0.41138	35371	0.00979814	349.979
STAT3	rs7211222	C	T	-0.0927	0.009424	7.861e-23	0.24466	35371	0.00272807	96.753
STAT3	rs7217251	C	G	0.1164	0.012186	1.27e-21	0.12508	35370	0.00257294	91.2345
STAT3	rs939881	C	T	-0.0873	0.014352	1.182e-09	0.08377	35371	0.00104497	36.9981
PCDH9	rs116980107	G	A	0.1362	0.019021	8.044e-13	0.05099	35346	0.0014485	51.27
PCDH9	rs117749204	A	C	0.1525	0.022704	1.858e-11	0.03599	35348	0.00127472	45.1139
PCDH9	rs117849833	C	T	0.284	0.029392	4.351e-22	0.02203	35344	0.00263461	93.3585
PCDH9	rs12323244	C	G	-0.0571	0.008592	3.021e-11	0.42647	35336	0.00124831	44.1631
PCDH9	rs12428888	T	A	0.0783	0.013864	1.627e-08	0.10653	35340	0.000901754	31.8949
PCDH9	rs137974751	A	G	0.1925	0.028703	1.993e-11	0.02167	35351	0.00127073	44.9762
PCDH9	rs138637737	A	C	-0.1562	0.022717	6.162e-12	0.0356	35341	0.00133598	47.2754
PCDH9	rs141316667	C	T	0.1517	0.023077	4.906e-11	0.03579	35344	0.00122114	43.2104
PCDH9	rs141847977	C	A	-0.1485	0.026912	3.429e-08	0.02439	35351	0.000860568	30.4464
PCDH9	rs145059803	T	C	-0.1635	0.027689	3.527e-09	0.02376	35341	0.00098563	34.8655
PCDH9	rs146180741	T	C	0.1865	0.032676	1.146e-08	0.01717	35351	0.000920658	32.5743
PCDH9	rs151165951	C	T	0.1555	0.013606	3.013e-30	0.10765	35338	0.00368261	130.61
PCDH9	rs17081140	A	C	-0.1763	0.031236	1.66e-08	0.01893	35337	0.000900685	31.8544
PCDH9	rs17082409	C	A	0.1399	0.019528	7.832e-13	0.04875	35351	0.00144973	51.321
PCDH9	rs1927821	T	C	-0.1318	0.01337	6.345e-23	0.11258	35344	0.00274195	97.1725
PCDH9	rs201110618	CCCC	CCC	0.0898	0.013285	1.386e-11	0.11317	35342	0.00129115	45.6883
PCDH9	rs34020075	A	G	0.0883	0.015734	1.998e-08	0.07794	35349	0.000890183	31.4933
PCDH9	rs35120380	T	C	-0.2942	0.014799	6.104e-88	0.09007	35347	0.0110571	395.181
PCDH9	rs4883790	T	C	-0.1032	0.014172	3.289e-13	0.10164	35341	0.00149819	53.024
PCDH9	rs5029115	A	G	0.1218	0.012448	1.306e-22	0.13179	35345	0.00270142	95.735
PCDH9	rs552612	C	T	-0.0601	0.01098	4.408e-08	0.1837	35345	0.000846932	29.9585
PCDH9	rs5804316	AT	A	-0.2933	0.013358	7.505e-107	0.1144	35347	0.0134557	482.077
PCDH9	rs61959239	T	A	-0.156	0.02473	2.824e-10	0.02988	35344	0.0011246	39.7902
PCDH9	rs61959972	A	G	0.2501	0.03793	4.287e-11	0.01267	35345	0.00122857	43.4748
PCDH9	rs6562466	C	A	0.0968	0.008567	1.334e-29	0.43247	35339	0.00359975	127.664
PCDH9	rs71442692	T	C	-0.1256	0.023013	4.818e-08	0.0357	35337	0.000842243	29.7857
PCDH9	rs7318423	A	C	-0.0718	0.008573	5.517e-17	0.41523	35338	0.00198098	70.1389
PCDH9	rs74093493	T	G	-0.1271	0.016157	3.651e-15	0.07355	35347	0.00174766	61.8793
PCDH9	rs74239375	A	G	-0.073	0.011651	3.71e-10	0.15711	35334	0.0011098	39.255
PCDH9	rs75052395	A	G	0.4619	0.039817	4.094e-31	0.01122	35339	0.00379362	134.566
PCDH9	rs76510117	C	T	-0.1554	0.015553	1.66e-23	0.08034	35342	0.00281681	99.8273
PCDH9	rs77172831	A	C	-0.1361	0.020684	4.71e-11	0.04343	35339	0.00122366	43.2935
PCDH9	rs77419701	C	T	0.2959	0.020577	6.907e-47	0.04405	35341	0.00581719	206.777
PCDH9	rs77847828	T	C	0.3251	0.033081	8.58e-23	0.01513	35344	0.00272506	96.5722
PCDH9	rs79237712	C	T	-0.2105	0.02748	1.858e-14	0.02555	35351	0.0016571	58.6741
PCDH9	rs9317630	A	C	0.0761	0.008694	2.066e-18	0.40054	35341	0.00216327	76.6135
PCDH9	rs9317641	A	G	-0.1454	0.009288	3.1e-55	0.29407	35344	0.00688601	245.053
PCDH9	rs9529192	A	G	0.1861	0.00918	2.287e-91	0.30413	35342	0.0114946	410.944
PCDH9	rs9540690	A	T	0.0999	0.011147	3.192e-19	0.1766	35337	0.00226777	80.3138
PCDH9	rs9541043	G	A	-0.0781	0.013324	4.588e-09	0.11474	35346	0.000971115	34.3564
PCDH9	rs9541183	C	G	-0.0503	0.008946	1.881e-08	0.35362	35340	0.000893765	31.6121
PCDH9	rs956223	C	T	0.1445	0.023683	1.052e-09	0.03349	35336	0.00105242	37.2253
PCDH9	rs956277	T	C	0.0893	0.010312	4.741e-18	0.22146	35341	0.00211747	74.9881
PCDH9	rs9571698	A	G	-0.1042	0.013255	3.814e-15	0.11695	35340	0.00174562	61.7947
PCDH9	rs9571710	T	G	0.196	0.009574	3.893e-93	0.26606	35344	0.011719	419.084
PCDH9	rs9571757	C	A	-0.0652	0.008593	3.265e-14	0.42712	35348	0.00162605	57.568
PCDH9	rs9599244	C	T	-0.1123	0.011011	1.998e-24	0.17819	35343	0.00293445	104.012
PCDH9	rs9599272	G	T	-0.0545	0.008543	1.774e-10	0.48771	35349	0.00114999	40.6956
APMAP	rs117368521	CT	CC	-0.1865	0.027797	1.956e-11	0.02068	35354	0.00127166	45.0129
APMAP	rs12242	C	T	-0.1942	0.015037	3.706e-38	0.07496	35354	0.00469563	166.783
APMAP	rs12624459	T	C	-0.077	0.008904	5.235e-18	0.2757	35354	0.00211084	74.7802
APMAP	rs142751091	G	C	0.0607	0.009269	5.793e-11	0.23801	35353	0.0012116	42.8832
APMAP	rs1980822	T	C	-0.0511	0.008988	1.304e-08	0.26748	35352	0.000913492	32.3215
APMAP	rs41308619	C	A	-0.2009	0.035232	1.183e-08	0.0127	35354	0.000918856	32.5133
APMAP	rs6036977	T	C	-0.1558	0.01203	2.32e-38	0.11921	35354	0.00472182	167.718
APMAP	rs6083648	C	T	-0.0559	0.008106	5.337e-12	0.38798	35354	0.00134335	47.5539
APMAP	rs76430933	AAAAGTG	GAAAGTG	0.1393	0.021707	1.388e-10	0.03279	35353	0.00116351	41.1792
PLOD3	rs12705082	A	G	-0.088	0.016137	4.948e-08	0.06948	35357	0.000840387	29.7369
PLOD3	rs142309161	T	C	-0.3678	0.031909	9.701e-31	0.017	35355	0.00374384	132.853
PLOD3	rs144081584	T	C	-0.3023	0.035124	7.524e-18	0.01455	35355	0.00209078	74.0702
PLOD3	rs145823272	T	C	-0.1105	0.017015	8.347e-11	0.06441	35355	0.00119149	42.1732
PLOD3	rs150814238	T	C	0.0878	0.014415	1.122e-09	0.08856	35351	0.00104834	37.0967
PLOD3	rs189435310	T	G	-0.1491	0.022806	6.246e-11	0.03473	35356	0.00120745	42.7398
PLOD3	rs62465594	T	C	-0.1399	0.025526	4.236e-08	0.02733	35355	0.000848888	30.0362
PLOD3	rs73173919	A	C	-0.2296	0.02752	7.241e-17	0.02193	35355	0.00196491	69.6021
PLOD3	rs73173931	T	C	-0.1804	0.024072	6.67e-14	0.02983	35353	0.00158611	56.1596
MSMB	rs10751373	G	A	0.2068	0.008279	1.02e-137	0.46598	35314	0.0173617	623.908
MSMB	rs10826223	T	C	0.4126	0.013532	1e-200	0.10159	35316	0.0256495	929.629
MSMB	rs10906939	G	C	-0.1282	0.009365	1.172e-42	0.26844	35311	0.005279	187.385
MSMB	rs10994294	A	G	0.5087	0.019619	3.191e-148	0.04735	35317	0.0186808	672.272
MSMB	rs10994675	T	C	-0.3065	0.008305	1e-200	0.40503	35316	0.0371344	1361.94
MSMB	rs111786141	G	A	0.1233	0.017764	3.896e-12	0.05766	35315	0.00136236	48.1748
MSMB	rs112016780	G	A	-0.1832	0.032622	1.956e-08	0.01674	35316	0.000892217	31.5359
MSMB	rs11239389	A	G	0.271	0.040413	2.003e-11	0.01175	35315	0.0012717	44.9647
MSMB	rs11259754	G	A	0.1315	0.012183	3.696e-27	0.13439	35310	0.00328863	116.498
MSMB	rs112687846	A	G	-0.3432	0.016832	2.07e-92	0.06449	35316	0.0116351	415.718
MSMB	rs112799703	A	C	0.2474	0.017915	2.233e-43	0.05598	35313	0.00537146	190.696
MSMB	rs112886809	T	A	0.3516	0.027031	1.112e-38	0.02389	35312	0.00476843	169.18
MSMB	rs113183133	C	T	0.2388	0.020476	1.983e-31	0.04702	35310	0.00383717	136.005
MSMB	rs113371486	TATATCTT	TATATCT	-0.3617	0.02961	2.574e-34	0.02074	35314	0.00420767	149.209
MSMB	rs113691098	T	C	-0.499	0.026439	1.878e-79	0.02486	35315	0.00998604	356.194
MSMB	rs113730670	A	G	0.3784	0.038417	6.871e-23	0.01171	35316	0.00273963	97.0132
MSMB	rs113749034	T	C	0.6431	0.028577	3.764e-112	0.0212	35316	0.0141374	506.406
MSMB	rs113955117	A	G	0.3391	0.038754	2.134e-18	0.01137	35317	0.00216321	76.5593
MSMB	rs11511618	A	G	0.3102	0.011132	6.818e-171	0.16567	35316	0.021514	776.448
MSMB	rs11593319	A	C	0.4607	0.014918	1e-200	0.08372	35316	0.0262949	953.654
MSMB	rs11596822	G	A	0.2565	0.020659	2.139e-35	0.04267	35315	0.00434616	154.146
MSMB	rs116983255	A	G	-0.39	0.040151	2.646e-22	0.01097	35316	0.00266444	94.3435
MSMB	rs117144687	G	A	-0.7796	0.022575	1e-200	0.03363	35315	0.0326667	1192.51
MSMB	rs117851612	T	A	0.2399	0.018644	6.863e-38	0.05087	35314	0.00466664	165.561
MSMB	rs117979646	T	C	0.4134	0.020307	3.972e-92	0.04414	35315	0.0115991	414.405
MSMB	rs118085580	G	A	0.2604	0.016484	3.244e-56	0.06753	35314	0.007017	249.535
MSMB	rs12413425	G	T	-0.3403	0.029208	2.273e-31	0.02011	35314	0.00382919	135.736
MSMB	rs12777595	G	C	-0.5186	0.007268	1e-200	0.15742	35315	0.126004	5091.09
MSMB	rs138899740	G	A	-0.187	0.021875	1.246e-17	0.0375	35315	0.00206505	73.0739
MSMB	rs139112240	A	C	-0.2007	0.03602	2.52e-08	0.01347	35316	0.000878323	31.0444
MSMB	rs141686481	A	G	0.3046	0.031662	6.565e-22	0.01728	35316	0.00261382	92.5462
MSMB	rs142671014	A	T	-0.7408	0.028383	3.613e-150	0.0218	35314	0.0189252	681.178
MSMB	rs143911096	T	C	0.275	0.024013	2.299e-30	0.02939	35316	0.00369991	131.144
MSMB	rs146552199	C	T	0.1321	0.020542	1.271e-10	0.0421	35315	0.00116964	41.3519
MSMB	rs146762087	C	T	0.2727	0.028551	1.282e-21	0.02212	35315	0.00257661	91.2227
MSMB	rs146808512	G	C	-0.5673	0.027019	7.048e-98	0.02357	35315	0.0123293	440.821
MSMB	rs147268846	A	G	0.2956	0.033269	6.378e-19	0.01642	35316	0.00223043	78.9414
MSMB	rs147703586	G	A	-0.307	0.032254	1.764e-21	0.01624	35316	0.00255874	90.591
MSMB	rs148384990	G	A	0.4559	0.026969	4.165e-64	0.02423	35315	0.00802694	285.749
MSMB	rs150217605	G	A	0.432	0.033609	8.209e-38	0.01524	35316	0.00465648	165.208
MSMB	rs150698630	A	G	0.3853	0.028189	1.563e-42	0.02147	35314	0.0052626	186.816
MSMB	rs1571963	T	C	-0.1941	0.023678	2.456e-16	0.03299	35314	0.00189928	67.1949
MSMB	rs183116378	C	T	0.2937	0.025587	1.693e-30	0.02883	35316	0.0037169	131.748
MSMB	rs184375083	T	G	-0.1185	0.021455	3.33e-08	0.03765	35314	0.000863093	30.5039
MSMB	rs185258849	G	A	-0.1442	0.014138	1.987e-24	0.0947	35315	0.00293709	104.023
MSMB	rs185618366	G	C	-0.4787	0.033334	9.13e-47	0.01646	35315	0.00580583	206.218
MSMB	rs187916528	GCAGGGGGGAAA	GCAGGGGGGGAA	-0.5673	0.023951	5.054e-124	0.03127	35310	0.0156399	560.988
MSMB	rs190536463	A	C	-0.3322	0.022648	1.03e-48	0.0356	35316	0.00605523	215.137
MSMB	rs1932515	G	C	0.1376	0.013663	7.432e-24	0.10334	35315	0.00286378	101.419
MSMB	rs1936395	C	T	-0.2933	0.0138	3.028e-100	0.0987	35314	0.0126299	451.691
MSMB	rs199942225	A	G	-0.455	0.022772	8.117e-89	0.03503	35315	0.0111784	399.205
MSMB	rs200245766	T	G	-0.5209	0.031723	1.37e-60	0.01711	35315	0.00757701	269.61
MSMB	rs200251308	G	A	0.258	0.018517	4.005e-44	0.05388	35315	0.00546711	194.121
MSMB	rs200883529	T	C	0.2398	0.024067	2.19e-23	0.0313	35315	0.00280334	99.2727
MSMB	rs201593506	G	A	0.2587	0.022452	1.017e-30	0.03397	35314	0.00374547	132.757
MSMB	rs2670538	G	T	0.1622	0.023288	3.287e-12	0.03229	35315	0.00137177	48.5079
MSMB	rs2843564	C	A	-0.7428	0.005052	1e-200	0.40347	35315	0.37971	21616.9
MSMB	rs3013815	T	C	0.1019	0.008556	1.046e-32	0.38841	35308	0.00400122	141.835
MSMB	rs34754236	CTG	CCG	0.0965	0.008476	4.959e-30	0.4076	35311	0.00365739	129.613
MSMB	rs35416098	G	C	-0.4155	0.018657	7.164e-110	0.05232	35316	0.0138494	495.945
MSMB	rs35621336	C	A	-0.3442	0.022073	8.034e-55	0.03789	35313	0.00683887	243.15
MSMB	rs4926078	T	G	-0.2256	0.011378	1.687e-87	0.15689	35311	0.011011	393.117
MSMB	rs4929842	C	G	-0.3041	0.035352	7.829e-18	0.01342	35319	0.00209068	73.9912
MSMB	rs4948675	A	G	-0.1692	0.009876	8.567e-66	0.22868	35316	0.00824276	293.504
MSMB	rs56118822	G	A	-0.4219	0.01887	1.006e-110	0.05155	35316	0.0139572	499.863
MSMB	rs61850100	A	T	-0.7628	0.011029	1e-200	0.06235	35315	0.119295	4783.27
MSMB	rs61855783	A	T	-0.4808	0.038174	2.253e-36	0.01084	35316	0.00447173	158.624
MSMB	rs61855819	A	G	-0.3906	0.026904	9.301e-48	0.02334	35315	0.00593317	210.769
MSMB	rs7095705	C	T	-0.0804	0.011569	3.662e-12	0.15228	35316	0.0013657	48.2943
MSMB	rs71496661	G	A	-0.0845	0.008333	3.668e-24	0.47807	35315	0.00290328	102.822
MSMB	rs71496674	A	G	0.1964	0.023605	8.789e-17	0.03179	35315	0.00195643	69.223
MSMB	rs72789720	G	A	0.2726	0.023319	1.436e-31	0.03289	35315	0.00385474	136.649
MSMB	rs72791905	A	G	-0.8511	0.035925	4.481e-124	0.01389	35316	0.015644	561.233
MSMB	rs74974840	T	C	-0.2188	0.011413	6.526e-82	0.15487	35315	0.0103001	367.511
MSMB	rs75764821	A	G	0.2	0.026642	6.054e-14	0.02612	35314	0.00159326	56.351
MSMB	rs76976134	A	G	0.2622	0.008568	1e-200	0.38324	35315	0.0258333	936.444
MSMB	rs76999218	A	G	-0.3007	0.025262	1.138e-32	0.0285	35314	0.00399618	141.679
MSMB	rs77547889	C	T	0.3447	0.040281	1.154e-17	0.01083	35315	0.0020693	73.2247
MSMB	rs78111532	C	T	-0.2419	0.016722	1.978e-47	0.06728	35315	0.00589074	209.253
MSMB	rs78347598	T	C	0.4845	0.02616	1.412e-76	0.02661	35315	0.00961955	342.995
MSMB	rs78522102	G	A	-0.4606	0.02655	2.039e-67	0.02567	35314	0.00845058	300.95
MSMB	rs78951441	G	C	-0.5811	0.021537	2.445e-160	0.03886	35315	0.0201981	727.959
MSMB	rs7895391	T	C	0.1886	0.030428	5.71e-10	0.01852	35315	0.00108669	38.416
MSMB	rs7897036	C	G	0.19	0.019923	1.471e-21	0.04441	35316	0.00256868	90.9438
MSMB	rs9422239	T	C	-0.1021	0.012857	2.006e-15	0.12093	35318	0.00178238	63.0591
GNRH2	rs1034063	G	A	-0.0478	0.007914	1.54e-09	0.45898	35365	0.00103049	36.4787
GNRH2	rs146720554	A	G	-0.238	0.030127	2.792e-15	0.01631	35366	0.00176153	62.4047
GNRH2	rs2024555	T	G	-0.0544	0.008958	1.256e-09	0.26006	35366	0.00104169	36.8766
GNRH2	rs2296236	T	C	-0.2021	0.010378	1.844e-84	0.16991	35366	0.0106093	379.211
GNRH2	rs6051431	T	C	0.0459	0.008366	4.106e-08	0.33724	35366	0.000850421	30.0999
GNRH2	rs6084177	CACTTA	CGCTTA	-0.0625	0.00892	2.441e-12	0.26726	35364	0.00138633	49.0914
GNRH2	rs6084243	TTATTAT	TTATTAC	-0.152	0.024252	3.666e-10	0.02656	35366	0.00110949	39.2796
GNRH2	rs6115777	G	T	-0.0574	0.008023	8.414e-13	0.40236	35362	0.00144539	51.183
GNRH2	rs6132977	A	G	-0.1546	0.026016	2.806e-09	0.02251	35366	0.000997513	35.3113
ACE	rs10491186	G	A	0.2482	0.013067	1.888e-80	0.11369	35357	0.0101011	360.767
ACE	rs11079514	C	T	0.3167	0.034987	1.405e-19	0.01415	35356	0.00231214	81.9329
ACE	rs111289752	A	G	0.3357	0.041095	3.115e-16	0.01097	35357	0.00188378	66.7268
ACE	rs111716174	G	A	0.1137	0.018513	8.171e-10	0.05433	35356	0.00106572	37.7175
ACE	rs111725844	T	C	0.3298	0.01681	1.068e-85	0.06264	35356	0.0107696	384.894
ACE	rs111736142	G	A	0.1826	0.023701	1.316e-14	0.03036	35355	0.00167606	59.3531
ACE	rs113014619	C	T	0.1131	0.018851	1.978e-09	0.05034	35353	0.00101716	35.9941
ACE	rs113126152	T	C	0.2338	0.014759	1.615e-56	0.08541	35356	0.00704759	250.929
ACE	rs113252144	T	C	-0.0832	0.013087	2.05e-10	0.11382	35351	0.00114201	40.4149
ACE	rs113336518	T	C	-0.2962	0.034273	5.507e-18	0.01487	35354	0.00210819	74.6864
ACE	rs113764358	T	C	0.2741	0.018012	2.705e-52	0.0557	35357	0.00650704	231.563
ACE	rs11377968	AG	A	-0.0512	0.008319	7.533e-10	0.46239	35354	0.00107027	37.8768
ACE	rs11514500	T	G	0.145	0.022643	1.516e-10	0.03457	35356	0.00115851	41.0056
ACE	rs11650201	G	T	-0.2218	0.010197	6.626e-105	0.21204	35355	0.0132055	473.101
ACE	rs11652994	T	C	0.3639	0.032181	1.201e-29	0.01631	35357	0.00360348	127.862
ACE	rs116901530	A	G	0.4066	0.038069	1.253e-26	0.01204	35356	0.0032161	114.069
ACE	rs116960479	T	C	0.3065	0.030128	2.61e-24	0.01877	35351	0.0029191	103.489
ACE	rs117029342	G	A	-0.0886	0.010276	6.555e-18	0.28719	35349	0.0020986	74.3352
ACE	rs117054431	A	G	0.3478	0.038803	3.155e-19	0.0125	35355	0.00226721	80.3348
ACE	rs117553826	C	G	-0.2844	0.041513	7.343e-12	0.01017	35356	0.00132572	46.9317
ACE	rs117632363	C	T	-0.2401	0.035303	1.038e-11	0.01351	35357	0.00130653	46.2526
ACE	rs117848437	GTTTCA	GTTTCG	-0.1858	0.018838	6.022e-23	0.05027	35355	0.00274396	97.2741
ACE	rs118138685	C	G	-0.3004	0.017969	9.797e-63	0.05421	35356	0.00784277	279.465
ACE	rs118141165	G	C	0.1317	0.021163	4.869e-10	0.04119	35356	0.00109415	38.7251
ACE	rs11869535	G	A	0.1892	0.01602	3.463e-32	0.07117	35355	0.00392967	139.474
ACE	rs12709419	T	C	-0.2983	0.026394	1.288e-29	0.0262	35358	0.0035995	127.724
ACE	rs12709437	CCACCCCTT	CCACCCCTC	0.3783	0.030064	2.609e-36	0.01909	35357	0.00445824	158.327
ACE	rs12940774	A	G	0.401	0.035104	3.207e-30	0.01501	35353	0.00367747	130.482
ACE	rs12950741	C	A	-0.1212	0.016605	2.897e-13	0.06837	35354	0.00150465	53.2725
ACE	rs12952521	T	C	0.1698	0.020979	5.778e-16	0.04041	35356	0.00184943	65.506
ACE	rs138691660	A	G	-0.2838	0.023003	5.694e-35	0.03276	35357	0.00428662	152.206
ACE	rs139241617	A	G	-0.2455	0.026975	8.94e-20	0.02383	35356	0.00233723	82.8239
ACE	rs141332316	T	C	0.1132	0.015478	2.597e-13	0.07761	35356	0.00151058	53.4858
ACE	rs141829001	A	G	-0.1887	0.031627	2.425e-09	0.01733	35356	0.00100584	35.5962
ACE	rs142459276	T	C	-0.2728	0.029307	1.297e-20	0.0197	35356	0.00244467	86.6406
ACE	rs143257018	A	G	-0.3442	0.032475	3.012e-26	0.01602	35351	0.0031677	112.331
ACE	rs143320659	G	T	-0.1388	0.019989	3.821e-12	0.04373	35356	0.00136189	48.2139
ACE	rs144248294	C	T	0.1678	0.022365	6.253e-14	0.0351	35356	0.00158962	56.2887
ACE	rs144289679	G	T	-0.5491	0.027766	4.805e-87	0.02372	35354	0.0109411	391.067
ACE	rs144425420	A	G	0.2534	0.031789	1.569e-15	0.01744	35357	0.00179393	63.5382
ACE	rs144762318	T	C	0.1877	0.024206	8.877e-15	0.02923	35356	0.00169778	60.1254
ACE	rs145535812	T	C	0.1908	0.023563	5.614e-16	0.03214	35350	0.0018514	65.5648
ACE	rs146194835	TTTTGTTTG	TTTTG	-0.0594	0.010115	4.291e-09	0.21706	35352	0.000974549	34.4839
ACE	rs146873596	A	G	-0.2332	0.019452	4.085e-33	0.04825	35357	0.00404847	143.716
ACE	rs147224255	T	A	0.1946	0.023845	3.324e-16	0.03121	35354	0.00188033	66.5988
ACE	rs148768565	T	C	0.277	0.024658	2.785e-29	0.02882	35356	0.00355659	126.188
ACE	rs148903398	C	T	-0.1695	0.027301	5.345e-10	0.023	35354	0.00108911	38.5441
ACE	rs148929204	A	G	0.1878	0.020687	1.105e-19	0.04241	35353	0.00232573	82.4084
ACE	rs150095719	T	A	0.2981	0.022187	3.73e-41	0.03625	35352	0.00508043	180.51
ACE	rs17563098	T	C	0.154	0.015022	1.164e-24	0.08356	35355	0.00296378	105.09
ACE	rs181249305	C	G	-0.2459	0.034711	1.398e-12	0.01482	35354	0.00141752	50.1832
ACE	rs185402150	TT	AT	-0.5283	0.019581	2.56e-160	0.04575	35357	0.0201728	727.892
ACE	rs185987831	G	T	0.1591	0.025147	2.504e-10	0.02612	35353	0.00113097	40.0261
ACE	rs190886664	A	G	0.2065	0.02948	2.473e-12	0.01908	35356	0.00138586	49.0637
ACE	rs192516790	G	C	-0.2452	0.042548	8.269e-09	0.01005	35357	0.000938425	33.2092
ACE	rs1987032	A	T	0.1207	0.011429	4.512e-26	0.15547	35352	0.00314497	111.525
ACE	rs2005171	A	C	0.1393	0.008324	7.27e-63	0.4387	35354	0.0078591	280.036
ACE	rs201322719	GA	G	0.31	0.032339	9.155e-22	0.01622	35355	0.00259234	91.8852
ACE	rs2270524	T	C	-0.1801	0.017473	6.534e-25	0.06041	35354	0.00299606	106.235
ACE	rs241060	G	A	-0.3861	0.024565	1.143e-55	0.02893	35357	0.00693852	247.025
ACE	rs2429385	A	G	-0.2106	0.019842	2.568e-26	0.04472	35356	0.00317615	112.647
ACE	rs2953186	C	T	0.193	0.026885	7.035e-13	0.02545	35355	0.0014555	51.5312
ACE	rs34396758	T	A	-0.0893	0.008278	3.963e-27	0.49959	35357	0.00328057	116.366
ACE	rs35631456	T	C	0.2251	0.013775	4.996e-60	0.0988	35356	0.00749613	267.02
ACE	rs35749340	G	T	0.2102	0.020334	4.772e-25	0.0433	35356	0.00301333	106.855
ACE	rs36122742	A	T	0.1401	0.018001	7.089e-15	0.05545	35355	0.00171036	60.5701
ACE	rs372982779	AAATAATAATAATAATAAT	AAATAATAAT	-0.2607	0.038434	1.177e-11	0.01191	35356	0.00129964	46.0073
ACE	rs3730025	G	A	-1.2165	0.033356	1e-200	0.01534	35358	0.0362536	1330
ACE	rs3744287	G	A	0.2324	0.040758	1.184e-08	0.01112	35354	0.000918774	32.5104
ACE	rs41280092	A	G	-0.1967	0.027105	3.962e-13	0.02389	35356	0.00148731	52.6605
ACE	rs41295245	A	G	-0.2466	0.024725	1.985e-23	0.02794	35354	0.00280579	99.4693
ACE	rs4277404	T	C	0.2989	0.020415	1.532e-48	0.04118	35356	0.00602649	214.352
ACE	rs4968650	T	C	-0.4544	0.006254	1e-200	0.37437	35355	0.129918	5278.81
ACE	rs4968748	A	G	-0.3472	0.009319	1e-200	0.25149	35357	0.0377765	1388.02
ACE	rs62073140	A	G	0.3582	0.03317	3.487e-27	0.01479	35356	0.00328751	116.61
ACE	rs6504163	T	C	-0.4822	0.00614	1e-200	0.42244	35354	0.14854	6167.27
ACE	rs72835242	T	C	-0.1515	0.012104	6.033e-36	0.13437	35356	0.00441148	156.654
ACE	rs72841383	C	T	-0.2933	0.026421	1.238e-28	0.02508	35357	0.00347327	123.226
ACE	rs72842199	T	C	-0.2391	0.023977	2.018e-23	0.03098	35356	0.0028047	99.4363
ACE	rs72845004	T	C	-0.3012	0.016497	1.808e-74	0.06561	35357	0.00934005	333.331
ACE	rs75163181	C	A	-0.3899	0.032322	1.656e-33	0.01711	35351	0.00409944	145.508
ACE	rs75380519	T	A	0.1272	0.02234	1.242e-08	0.03546	35353	0.000916186	32.4178
ACE	rs76535058	A	C	0.1723	0.01816	2.355e-21	0.05502	35352	0.00253992	90.0149
ACE	rs76987930	G	A	0.163	0.029523	3.37e-08	0.02056	35355	0.000861448	30.481
ACE	rs76997925	T	C	-0.1419	0.021783	7.307e-11	0.03613	35356	0.0011988	42.4331
ACE	rs77155740	A	G	-0.1676	0.019491	8.065e-18	0.04722	35354	0.00208705	73.9359
ACE	rs78369934	C	T	-0.2061	0.017924	1.345e-30	0.05906	35356	0.00372565	132.209
ACE	rs78446857	A	C	0.2708	0.032942	2.025e-16	0.01626	35357	0.00190762	67.5729
ACE	rs78617818	T	C	-0.0742	0.012838	7.484e-09	0.11776	35356	0.00094393	33.4032
ACE	rs79480822	T	C	0.2631	0.018057	4.342e-48	0.05688	35355	0.00596897	212.288
ACE	rs79645992	C	T	0.1328	0.011598	2.339e-30	0.14769	35357	0.00369443	131.101
ACE	rs8066276	C	T	0.1999	0.008332	3.312e-127	0.41926	35354	0.0160204	575.576
ACE	rs8067243	T	C	0.1229	0.02083	3.633e-09	0.04136	35351	0.000983776	34.8097
ACE	rs8069038	G	A	0.0885	0.015255	6.573e-09	0.07986	35351	0.000951146	33.6541
ACE	rs8076157	C	T	-0.1805	0.009463	4.183e-81	0.25333	35355	0.0101859	363.808
ACE	rs885633	T	C	0.2821	0.023973	5.731e-32	0.02908	35350	0.00390188	138.464
ACE	rs940744	G	A	0.1008	0.009746	4.516e-25	0.23243	35356	0.00301643	106.965
ACE	rs9894552	AAAATTAAATTAAATTAAAATAAAATAAAATAAAATAAAATAAAATAAAAT	AAAATAAAATTAAATTAAAATAAAATAAAATAAAATAAAATAAAATAAAAT	0.1841	0.009044	4.147e-92	0.46918	35328	0.0115932	414.345
ACE	rs9903476	T	C	-0.2591	0.016672	1.836e-54	0.06534	35356	0.00678484	241.51
ACE	rs9907593	C	G	0.0857	0.008455	3.804e-24	0.39882	35350	0.00289791	102.733
SMPD1	rs1050239	A	G	-0.3608	0.006687	1e-200	0.28992	35363	0.0760614	2911.02
SMPD1	rs10769687	C	T	-0.0696	0.008353	7.958e-17	0.48627	35365	0.00195933	69.4239
SMPD1	rs10839555	C	G	-0.1372	0.009229	5.526e-50	0.28622	35366	0.00621023	220.991
SMPD1	rs11038926	A	G	-0.0619	0.010029	6.73e-10	0.22884	35364	0.00107606	38.0927
SMPD1	rs11040254	T	C	-0.0636	0.009446	1.663e-11	0.26728	35367	0.00128016	45.3308
SMPD1	rs11041298	G	A	-0.1519	0.024172	3.296e-10	0.03109	35370	0.00111525	39.4881
SMPD1	rs113199701	T	C	0.128	0.022001	5.96e-09	0.0387	35368	0.000956113	33.8462
SMPD1	rs113371018	C	G	-0.1427	0.025817	3.249e-08	0.02708	35368	0.00086308	30.55
SMPD1	rs11544764	ACCAGCAGTCCGTGGTTGGCCT	ACCAGCAGCCCGTGGTTGGCCT	0.0776	0.012459	4.716e-10	0.13055	35365	0.00109574	38.7911
SMPD1	rs1159431	C	T	-0.1512	0.020755	3.213e-13	0.04217	35365	0.00149842	53.0681
SMPD1	rs117985794	A	G	-0.1856	0.030616	1.342e-09	0.02023	35363	0.00103815	36.7481
SMPD1	rs11820835	C	T	0.0744	0.012099	7.772e-10	0.1364	35367	0.00106803	37.8114
SMPD1	rs12271375	T	C	-0.1045	0.017345	1.692e-09	0.06202	35366	0.0010253	36.2961
SMPD1	rs12417049	C	T	0.1131	0.015547	3.467e-13	0.07953	35367	0.00149412	52.9185
SMPD1	rs139497462	C	A	-0.2177	0.038998	2.374e-08	0.01223	35368	0.000880317	31.1607
SMPD1	rs142303644	T	C	-0.2121	0.027837	2.552e-14	0.02445	35363	0.00163899	58.0513
SMPD1	rs143258522	C	T	0.1896	0.022443	2.966e-17	0.03683	35366	0.00201397	71.3658
SMPD1	rs145910911	CCTTGTCTAAA	CCTTGTC	0.1408	0.012108	2.954e-31	0.13711	35366	0.00380905	135.218
SMPD1	rs146169943	AC	A	0.109	0.017107	1.87e-10	0.06499	35363	0.00114672	40.5958
SMPD1	rs147145913	G	A	-0.3613	0.039265	3.529e-20	0.01148	35366	0.00238836	84.6643
SMPD1	rs148106490	A	G	0.178	0.028845	6.791e-10	0.02136	35366	0.00107559	38.078
SMPD1	rs149116355	T	C	-0.1814	0.027967	8.798e-11	0.02196	35365	0.00118821	42.0686
SMPD1	rs150320888	T	C	0.1444	0.017966	9.164e-16	0.05787	35364	0.00182338	64.5962
SMPD1	rs16911940	A	T	-0.0889	0.011713	3.206e-14	0.14792	35365	0.00162625	57.6027
SMPD1	rs16914574	C	T	0.1586	0.02134	1.068e-13	0.04057	35368	0.0015593	55.2323
SMPD1	rs17242778	C	T	-0.1772	0.024927	1.172e-12	0.0283	35364	0.00142694	50.5316
SMPD1	rs1876302	T	C	-0.2049	0.033584	1.053e-09	0.01587	35368	0.00105136	37.2216
SMPD1	rs2555148	A	G	0.0523	0.008813	2.949e-09	0.35671	35368	0.000994748	35.2153
SMPD1	rs2723673	T	C	0.222	0.015362	2.473e-47	0.07817	35366	0.0058704	208.827
SMPD1	rs34271039	T	C	0.1985	0.022901	4.404e-18	0.03512	35366	0.00211985	75.1255
SMPD1	rs35104022	A	G	-0.1099	0.015687	2.452e-12	0.0768	35374	0.00138557	49.0785
SMPD1	rs4627053	A	C	-0.0706	0.009861	8.113e-13	0.23742	35365	0.00144732	51.2558
SMPD1	rs4758405	A	G	0.0715	0.008575	7.556e-17	0.39985	35362	0.00196225	69.5215
SMPD1	rs4758415	T	C	-0.2448	0.012212	2.16e-89	0.13798	35364	0.0112352	401.814
SMPD1	rs56400934	G	C	0.1764	0.019443	1.159e-19	0.04681	35363	0.00232227	82.3088
SMPD1	rs57397396	C	T	0.1903	0.030429	4.003e-10	0.02036	35366	0.00110468	39.1091
SMPD1	rs61741824	C	T	-0.1306	0.019172	9.628e-12	0.0501	35369	0.00131027	46.401
SMPD1	rs7107618	A	G	0.0665	0.011756	1.545e-08	0.15332	35363	0.000904029	31.9963
SMPD1	rs71472625	C	G	-0.1883	0.028909	7.345e-11	0.02094	35371	0.00119803	42.4238
SMPD1	rs72880092	C	T	-0.0889	0.014199	3.82e-10	0.0957	35366	0.00110719	39.198
SMPD1	rs72896238	A	G	-0.2547	0.028327	2.44e-19	0.02169	35366	0.00228076	80.8411
SMPD1	rs72896243	A	G	0.1098	0.019333	1.352e-08	0.04955	35366	0.000911222	32.2539
SMPD1	rs77690773	C	T	-0.1693	0.025647	4.082e-11	0.02636	35364	0.00123068	43.5729
SMPD1	rs7931672	G	A	0.1919	0.030465	2.996e-10	0.01865	35368	0.0011206	39.6756
SMPD1	rs79811238	A	C	-0.2697	0.041008	4.808e-11	0.01128	35363	0.00122164	43.2514
HHIP	rs115339319	C	G	0.0712	0.011135	1.613e-10	0.16427	35346	0.00115541	40.8841
HHIP	rs116825877	G	A	0.1887	0.01893	2.098e-23	0.04884	35349	0.00280315	99.3615
HHIP	rs11727676	C	T	0.2352	0.013296	5.054e-70	0.10368	35350	0.00877437	312.902
HHIP	rs13127712	G	A	0.0457	0.008383	4.989e-08	0.41247	35348	0.000840047	29.7173
HHIP	rs2639576	C	T	0.0777	0.008283	6.537e-21	0.41719	35350	0.00248312	87.9918
HHIP	rs62344037	T	C	-0.0818	0.011649	2.189e-12	0.14648	35349	0.00139299	49.3066
HHIP	rs62346060	A	G	-0.0595	0.009893	1.808e-09	0.22094	35349	0.00102225	36.1704
HHIP	rs6537278	G	A	-0.0717	0.009276	1.076e-14	0.26388	35349	0.00168735	59.7437
HHIP	rs7438126	C	T	-0.0554	0.008236	1.737e-11	0.47588	35348	0.0012784	45.2441
CD58	rs10754443	T	A	-0.1037	0.012673	2.771e-16	0.11297	35345	0.00189081	66.9536
CD58	rs149122274	A	G	0.3156	0.028626	2.895e-28	0.01915	35348	0.00342686	121.542
CD58	rs61789227	G	A	0.6656	0.027448	6.699e-130	0.02109	35344	0.0163653	588.004
CD58	rs74517097	G	T	0.1442	0.025476	1.512e-08	0.02467	35352	0.000905442	32.0364
SPINK7	rs200046943	G	T	-0.0891	0.010818	1.774e-16	0.17368	35349	0.00191537	67.8324
SPINK7	rs62390793	T	C	0.0806	0.01173	6.366e-12	0.14305	35348	0.00133392	47.2117
SPINK7	rs9784645	T	G	0.1322	0.009459	2.184e-44	0.25293	35349	0.00549544	195.321
REG4	rs116062645	T	G	0.2238	0.021449	1.732e-25	0.03867	35352	0.00307013	108.863
REG4	rs12125319	C	T	0.1599	0.027012	3.228e-09	0.02414	35359	0.000990041	35.0396
REG4	rs12142268	C	G	-0.1022	0.011985	1.498e-17	0.1364	35353	0.00205261	72.7112
REG4	rs191615076	A	C	0.1979	0.022775	3.648e-18	0.03429	35350	0.00213137	75.5006
REG4	rs3009182	T	C	-0.1428	0.00999	2.376e-46	0.22116	35352	0.00574657	204.315
REG4	rs3748642	C	G	0.2218	0.040374	3.937e-08	0.01101	35358	0.000852828	30.1783
REG4	rs61598511	T	C	-0.1831	0.012826	3.121e-46	0.11661	35352	0.0057317	203.784
REG4	rs72697210	A	G	-0.2275	0.029593	1.5e-14	0.01921	35352	0.00166896	59.0963
REG4	rs75173717	G	A	0.3961	0.034716	3.744e-30	0.014	35352	0.00366893	130.174
REG4	rs80117153	C	G	0.1488	0.025951	9.818e-09	0.02641	35351	0.000929164	32.8756
HSPB1	rs10954258	T	C	-0.0572	0.008252	4.167e-12	0.46241	35341	0.0013577	48.0451
HSPB1	rs112463197	T	C	0.2678	0.010869	4.945e-134	0.16706	35341	0.0168875	607.04
HSPB1	rs112721570	C	G	-0.1815	0.016954	9.626e-27	0.06177	35339	0.00323257	114.6
HSPB1	rs113599839	CCTCAGA	CCTCAGC	0.1342	0.009844	2.584e-42	0.22225	35340	0.00523139	185.839
HSPB1	rs11465320	A	G	-0.0983	0.015607	3.01e-10	0.07584	35339	0.00112131	39.6683
HSPB1	rs117253096	T	C	0.1764	0.015076	1.262e-31	0.08077	35341	0.00385893	136.899
HSPB1	rs117296956	A	G	-0.2958	0.024674	4.086e-33	0.02756	35342	0.00405008	143.712
HSPB1	rs117306251	T	C	-0.0935	0.014972	4.241e-10	0.07692	35339	0.00110238	38.9977
HSPB1	rs117654247	A	G	-0.3999	0.029067	4.553e-43	0.02025	35341	0.00532726	189.268
HSPB1	rs117761179	G	A	-0.1654	0.02073	1.479e-15	0.04273	35337	0.0017983	63.6572
HSPB1	rs12534169	C	G	-0.2092	0.024769	3.01e-17	0.02809	35340	0.00201449	71.3316
HSPB1	rs13236526	G	A	0.327	0.007053	1e-200	0.31781	35341	0.0573358	2149.43
HSPB1	rs141284967	C	T	0.1209	0.017523	5.218e-12	0.05698	35335	0.00134538	47.6005
HSPB1	rs142991897	A	G	-0.3788	0.027521	4.182e-43	0.02174	35341	0.00533201	189.438
HSPB1	rs143310306	GTCCTTTCTCTCTCTCTCTCTCTCTCTT	CTCCTTTCTCTCTCTCTCTCTCTCTCTT	-0.4193	0.017585	1.167e-125	0.05647	35341	0.0158327	568.513
HSPB1	rs144815748	A	G	-0.2797	0.036932	3.637e-14	0.01263	35340	0.00162035	57.3528
HSPB1	rs145365854	G	A	-0.3464	0.029408	4.998e-32	0.0196	35339	0.00391083	138.74
HSPB1	rs145403918	G	A	-0.1142	0.010279	1.123e-28	0.19752	35339	0.00348066	123.426
HSPB1	rs145493761	A	T	-0.4025	0.03251	3.325e-35	0.01606	35341	0.00431856	153.276
HSPB1	rs1465314	T	G	-0.1915	0.009226	1.052e-95	0.26429	35340	0.0120443	430.81
HSPB1	rs146939960	C	T	0.1621	0.023252	3.136e-12	0.03262	35339	0.00137339	48.5983
HSPB1	rs146971411	C	G	0.165	0.026067	2.454e-10	0.02586	35335	0.00113263	40.0646
HSPB1	rs148328372	C	T	0.1955	0.032397	1.594e-09	0.01692	35337	0.00102945	36.4132
HSPB1	rs148925039	T	C	0.1512	0.02608	6.733e-09	0.025	35342	0.000950133	33.6096
HSPB1	rs150396430	T	C	0.2774	0.02913	1.686e-21	0.02005	35341	0.00255941	90.6791
HSPB1	rs150996856	A	G	0.0787	0.013171	2.3e-09	0.10659	35336	0.00100938	35.7016
HSPB1	rs187464303	T	C	0.1818	0.024316	7.624e-14	0.02905	35339	0.00157929	55.8958
HSPB1	rs1881134	C	G	0.2089	0.033562	4.836e-10	0.01398	35341	0.00109503	38.7397
HSPB1	rs192250296	G	C	-0.4227	0.029109	8.895e-48	0.01943	35341	0.00593127	210.856
HSPB1	rs2690564	A	G	0.1126	0.008856	4.879e-37	0.31349	35339	0.00455371	161.65
HSPB1	rs28824	A	C	-0.0664	0.012085	3.924e-08	0.13036	35337	0.000853576	30.1869
HSPB1	rs2906492	C	G	-0.165	0.010954	2.824e-51	0.17348	35340	0.00637935	226.881
HSPB1	rs34782970	G	A	0.2943	0.027107	1.847e-27	0.02196	35341	0.00332424	117.867
HSPB1	rs38583	A	G	-0.0956	0.008361	2.83e-30	0.39166	35335	0.0036863	130.73
HSPB1	rs4728477	C	T	0.053	0.008336	2.047e-10	0.40938	35338	0.00114261	40.4214
HSPB1	rs56071227	A	G	0.061	0.011084	3.724e-08	0.16458	35338	0.000856353	30.286
HSPB1	rs56094256	ATA	ATT	0.132	0.019596	1.627e-11	0.0456	35341	0.00128226	45.3721
HSPB1	rs56125578	GTCAGGT	ATCAGGT	-0.1395	0.013931	1.327e-23	0.09448	35337	0.00282959	100.267
HSPB1	rs58275187	AT	A	-0.195	0.028817	1.317e-11	0.0221	35341	0.00129399	45.7875
HSPB1	rs62475266	T	C	-0.2605	0.023688	3.954e-28	0.03082	35340	0.00341042	120.93
HSPB1	rs62475344	A	C	-0.3918	0.040528	4.144e-22	0.0106	35341	0.0026375	93.4531
HSPB1	rs6949454	C	G	0.0686	0.008454	4.861e-16	0.3665	35341	0.00185967	65.8414
HSPB1	rs6962194	A	C	0.067	0.008425	1.826e-15	0.38993	35335	0.0017866	63.239
HSPB1	rs71524923	GTGTGTGTGTGTGTGTGTG	GTGTGTGTGTGTG	0.131	0.021583	1.283e-09	0.03832	35342	0.0010413	36.8379
HSPB1	rs71560489	A	G	0.1041	0.015024	4.247e-12	0.08152	35339	0.00135671	48.0071
HSPB1	rs7223	A	G	-0.0972	0.009189	3.783e-26	0.27439	35340	0.00315614	111.885
HSPB1	rs74426379	T	C	-0.2	0.028091	1.082e-12	0.02175	35340	0.00143231	50.6875
HSPB1	rs76814244	G	T	-0.1214	0.018005	1.556e-11	0.05654	35340	0.00128477	45.4597
HSPB1	rs76852530	A	G	0.0962	0.014994	1.4e-10	0.08111	35339	0.00116347	41.1614
HSPB1	rs77644037	T	G	0.3343	0.029592	1.359e-29	0.01947	35341	0.00359815	127.614
HSPB1	rs7793676	C	T	0.1072	0.011048	2.926e-22	0.1619	35339	0.00265713	94.1451
HSPB1	rs7798363	T	C	0.1236	0.013706	1.922e-19	0.0996	35339	0.00229595	81.3188
HSPB1	rs78095786	G	A	-0.341	0.021651	6.865e-56	0.0353	35342	0.00696986	248.044
HSPB1	rs78154784	C	G	0.0881	0.008976	9.662e-23	0.29576	35339	0.00271863	96.33
HSPB1	rs79297309	G	C	0.1435	0.023395	8.574e-10	0.03146	35342	0.00106342	37.6212
HSPB1	rs794375	C	T	-0.0529	0.0085	4.87e-10	0.36692	35332	0.00109504	38.7301
HSPB1	rs79969407	A	G	-0.221	0.015326	3.858e-47	0.0764	35340	0.00584942	207.923
HSPB1	rs79972291	G	C	0.1533	0.009831	7.986e-55	0.22243	35341	0.00683333	243.144
SVEP1	rs1010788	G	C	-0.0798	0.009516	5.05e-17	0.26551	35361	0.00198477	70.3189
SVEP1	rs1049927	C	T	0.1493	0.012462	4.487e-33	0.13012	35359	0.00404282	143.522
SVEP1	rs10512398	C	A	0.0789	0.01226	1.232e-10	0.13414	35358	0.00116998	41.4141
SVEP1	rs10759430	C	A	0.1217	0.008896	1.333e-42	0.33266	35362	0.00526456	187.14
SVEP1	rs10817082	C	G	0.0743	0.008832	4.023e-17	0.35386	35363	0.00199729	70.7677
SVEP1	rs10980324	C	T	-0.282	0.023729	1.427e-32	0.03093	35359	0.0039784	141.226
SVEP1	rs10980453	A	G	-0.0805	0.014717	4.504e-08	0.08921	35362	0.000845374	29.9177
SVEP1	rs111718653	T	C	-0.1167	0.020808	2.041e-08	0.04257	35363	0.000888681	31.4526
SVEP1	rs113632189	T	C	0.1809	0.025346	9.528e-13	0.02923	35359	0.00143858	50.937
SVEP1	rs11375924	ATGAAAGAA	ATGAAAG	0.0728	0.009873	1.66e-13	0.23642	35364	0.0015351	54.3676
SVEP1	rs113941034	T	G	0.1228	0.022245	3.384e-08	0.03933	35358	0.000861133	30.4724
SVEP1	rs116853336	A	T	0.5931	0.0383	4.326e-54	0.01237	35360	0.00673613	239.791
SVEP1	rs117352212	T	C	0.2541	0.034229	1.14e-13	0.01496	35359	0.00155613	55.1057
SVEP1	rs117584091	C	A	0.3293	0.030004	5.024e-28	0.0202	35361	0.00339487	120.448
SVEP1	rs117649083	T	A	0.2163	0.026746	6.102e-16	0.0252	35363	0.00184605	65.399
SVEP1	rs117663452	T	C	0.2291	0.026307	3.076e-18	0.0261	35359	0.00214031	75.8373
SVEP1	rs117900161	G	A	-0.1934	0.028046	5.358e-12	0.02305	35362	0.00134292	47.5496
SVEP1	rs11792528	G	T	0.1334	0.013178	4.38e-24	0.1163	35358	0.0028898	102.468
SVEP1	rs12000829	C	T	-0.0491	0.008818	2.572e-08	0.35594	35359	0.000876077	31.0026
SVEP1	rs12335533	A	G	-0.0719	0.008609	6.722e-17	0.39083	35361	0.00196867	69.7474
SVEP1	rs12341362	A	G	-0.1216	0.013268	4.95e-20	0.11029	35360	0.00236981	83.9908
SVEP1	rs12344614	CGAT	GGAT	0.4036	0.014794	7.148e-164	0.08738	35362	0.0206133	744.229
SVEP1	rs12350319	T	C	-0.1164	0.017927	8.406e-11	0.05966	35359	0.00119089	42.1567
SVEP1	rs13284095	A	G	0.0783	0.010749	3.226e-13	0.19448	35355	0.0014986	53.0595
SVEP1	rs13285472	G	A	0.4044	0.038322	4.941e-26	0.01266	35366	0.00313888	111.353
SVEP1	rs1359876	C	G	-0.2158	0.024753	2.827e-18	0.0301	35367	0.00214445	76.0016
SVEP1	rs137950543	ATCTAAAAAAAAAAAAAAT	GTCTAAAAAAAAAAAAAAT	0.1883	0.033793	2.515e-08	0.01677	35359	0.000877336	31.0472
SVEP1	rs138538976	C	G	0.4484	0.027482	7.596e-60	0.02418	35363	0.00747185	266.201
SVEP1	rs139584567	G	A	0.2183	0.03046	7.683e-13	0.01951	35363	0.00145033	51.3598
SVEP1	rs139854432	G	A	0.7266	0.037282	1.356e-84	0.01256	35363	0.0106268	379.811
SVEP1	rs140993001	T	G	0.1602	0.028545	1.998e-08	0.02265	35362	0.000889901	31.4949
SVEP1	rs141633439	CCAACTTGGGTTTTGACCCACCTCGGGTTTTGACCCACCTC	CCAACTTGGGTTTTGACCCACCTC	0.2034	0.028834	1.736e-12	0.0223	35358	0.00140538	49.7585
SVEP1	rs141937351	A	C	0.1726	0.021149	3.322e-16	0.04086	35357	0.00188022	66.6005
SVEP1	rs143426311	T	C	-0.1379	0.017801	9.442e-15	0.0584	35361	0.00169425	60.0088
SVEP1	rs145419292	T	C	0.5826	0.033692	5.4e-67	0.01613	35359	0.00838553	298.994
SVEP1	rs145734823	C	G	0.2244	0.022402	1.282e-23	0.03627	35362	0.00282947	100.334
SVEP1	rs147747761	G	T	0.2237	0.028466	3.891e-15	0.02197	35361	0.0017434	61.7525
SVEP1	rs149834214	T	C	-0.1649	0.027767	2.871e-09	0.02405	35362	0.000996354	35.2662
SVEP1	rs1571260	A	G	0.0796	0.013259	1.931e-09	0.11245	35363	0.00101815	36.0396
SVEP1	rs17807662	T	C	-0.2269	0.019522	3.162e-31	0.0489	35362	0.00380564	135.081
SVEP1	rs181591311	TCTCA	CCTCA	0.213	0.019408	5.043e-28	0.04956	35366	0.00339418	120.441
SVEP1	rs1889322	T	C	0.1492	0.008388	8.876e-71	0.46536	35362	0.00886779	316.371
SVEP1	rs1891492	C	A	0.06	0.010982	4.667e-08	0.17884	35361	0.000843429	29.848
SVEP1	rs2151686	C	T	0.2165	0.011196	2.601e-83	0.16944	35360	0.0104643	373.909
SVEP1	rs2155470	C	T	-0.0734	0.008848	1.079e-16	0.34776	35361	0.00194237	68.8141
SVEP1	rs2209815	T	G	-0.053	0.008515	4.841e-10	0.41756	35358	0.00109451	38.7398
SVEP1	rs2297526	GTACATCTGATTTTT	GTATATCTGATTTTT	0.3028	0.026204	6.928e-31	0.02607	35362	0.00376186	133.522
SVEP1	rs2795057	C	T	0.0767	0.011284	1.068e-11	0.16587	35359	0.00130496	46.1998
SVEP1	rs314450	G	T	-0.0996	0.008566	3.007e-31	0.41786	35361	0.00380873	135.188
SVEP1	rs35572906	A	G	0.1081	0.009763	1.712e-28	0.24773	35362	0.00345498	122.591
SVEP1	rs368616000	GAAAAAAAAAAA	GAAAAAAAAA	0.1275	0.014485	1.344e-18	0.09211	35357	0.00218654	77.4745
SVEP1	rs3793532	C	A	0.0595	0.009226	1.127e-10	0.29605	35358	0.00117492	41.5894
SVEP1	rs3818764	G	C	-0.1751	0.010172	2.111e-66	0.21351	35359	0.00831066	296.302
SVEP1	rs41305611	A	T	0.1906	0.014859	1.15e-37	0.08846	35362	0.00463142	164.529
SVEP1	rs4460449	C	T	0.1022	0.0114	3.095e-19	0.1643	35360	0.00226774	80.3651
SVEP1	rs4461968	C	G	-0.0865	0.012156	1.111e-12	0.13471	35357	0.00143006	50.6321
SVEP1	rs551517	T	C	-0.0684	0.009645	1.326e-12	0.25623	35363	0.00142017	50.2902
SVEP1	rs555000	A	T	0.1133	0.011981	3.185e-21	0.14295	35361	0.00252262	89.423
SVEP1	rs558028	C	T	-0.2617	0.028284	2.19e-20	0.02263	35362	0.00241512	85.6054
SVEP1	rs560687	C	T	-0.072	0.008426	1.284e-17	0.48995	35361	0.00206064	73.0126
SVEP1	rs56217481	A	G	-0.1082	0.017242	3.492e-10	0.06331	35358	0.00111252	39.3781
SVEP1	rs59862957	A	G	-0.0709	0.011241	2.844e-10	0.16754	35361	0.00112375	39.7794
SVEP1	rs61751937	C	G	0.7436	0.022879	1e-200	0.03424	35362	0.0290058	1056.28
SVEP1	rs62571298	A	G	0.1099	0.011313	2.612e-22	0.16937	35363	0.00266154	94.3659
SVEP1	rs7031260	T	A	-0.0536	0.00933	9.189e-09	0.28393	35358	0.000932553	33.0021
SVEP1	rs7031870	A	G	-0.0778	0.010113	1.434e-14	0.21648	35363	0.0016708	59.18
SVEP1	rs72748038	T	C	-0.1064	0.019088	2.487e-08	0.05276	35362	0.000877898	31.0698
SVEP1	rs72758665	G	A	0.1118	0.010963	2.028e-24	0.18347	35361	0.00293241	103.992
SVEP1	rs72759341	G	A	0.3856	0.030953	1.274e-35	0.01913	35361	0.0043696	155.183
SVEP1	rs73526775	C	G	0.1842	0.026346	2.716e-12	0.02688	35358	0.00138058	48.8793
SVEP1	rs73531552	C	T	0.346	0.028498	6.375e-34	0.02244	35362	0.00415126	147.4
SVEP1	rs75823710	C	T	0.1056	0.017998	4.429e-09	0.05723	35358	0.000972678	34.4235
SVEP1	rs76036622	T	A	-0.1294	0.019045	1.088e-11	0.04974	35360	0.00130385	46.1617
SVEP1	rs77048935	A	G	0.5005	0.037254	3.789e-41	0.01356	35362	0.00507825	180.484
SVEP1	rs77585163	G	A	0.1448	0.013314	1.498e-27	0.11282	35359	0.00333403	118.276
SVEP1	rs77762920	T	G	-0.4384	0.033	2.83e-40	0.01587	35362	0.00496609	176.477
SVEP1	rs77910344	A	G	-0.1915	0.027335	2.46e-12	0.02374	35363	0.00138595	49.0766
SVEP1	rs78229991	C	T	0.1188	0.013789	6.975e-18	0.10385	35358	0.00209493	74.2237
SVEP1	rs7853220	T	C	0.0785	0.010346	3.26e-14	0.20686	35359	0.0016255	57.5665
SVEP1	rs7870870	T	C	-0.0617	0.009001	7.149e-12	0.32155	35361	0.00132705	46.9855
SVEP1	rs78776206	A	G	0.3062	0.02773	2.394e-28	0.02329	35361	0.0034363	121.923
SVEP1	rs79038826	C	T	0.1016	0.018162	2.217e-08	0.05625	35358	0.000884277	31.2922
SVEP1	rs79950608	T	C	0.1723	0.02151	1.144e-15	0.03999	35363	0.00181115	64.1601
SVEP1	rs9409105	A	G	-0.1061	0.01693	3.682e-10	0.06564	35363	0.00110939	39.2728
SVEP1	rs9969778	T	A	-0.1993	0.026216	2.914e-14	0.02617	35366	0.0016315	57.7906
MTRF1L	rs117892152	C	T	-0.1727	0.028204	9.166e-10	0.0195	35370	0.00105893	37.492
MTRF1L	rs12196687	A	T	-0.0573	0.009925	7.778e-09	0.20019	35368	0.000941518	33.3291
MTRF1L	rs187442135	A	G	-0.1656	0.027657	2.13e-09	0.01999	35370	0.00101259	35.8497
MTRF1L	rs2038332	G	A	-0.1934	0.009618	6.321e-90	0.2119	35370	0.0113024	404.314
MTRF1L	rs315424	G	A	0.0437	0.007976	4.286e-08	0.43393	35369	0.000848011	30.0171
MTRF1L	rs35714751	T	C	-0.098	0.017735	3.28e-08	0.05335	35368	0.00086259	30.5327
MTRF1L	rs3799125	T	C	0.0845	0.009219	4.933e-20	0.23981	35368	0.00236976	84.0081
MTRF1L	rs41302049	A	C	-0.1404	0.022269	2.889e-10	0.03282	35370	0.00112256	39.7474
MTRF1L	rs670307	G	A	0.0844	0.010202	1.305e-16	0.18225	35367	0.00193142	68.4368
MTRF1L	rs74481280	T	C	-0.1789	0.023236	1.37e-14	0.0292	35369	0.0016732	59.2752
MTRF1L	rs7450498	A	G	-0.0826	0.009368	1.177e-18	0.23086	35370	0.0021932	77.7395
MTRF1L	rs77758844	G	A	0.1261	0.020734	1.188e-09	0.03781	35369	0.00104469	36.9862
MTRF1L	rs9371656	T	C	0.1354	0.007889	5.014e-66	0.479	35370	0.00825955	294.557
SVEP1	rs1049927	C	T	0.144	0.012433	5.098e-31	0.13012	35359	0.00377945	134.137
SVEP1	rs10512398	C	A	0.0853	0.012234	3.115e-12	0.13414	35358	0.00137302	48.6112
SVEP1	rs10512405	C	T	-0.1376	0.009118	1.841e-51	0.3047	35362	0.00639901	227.726
SVEP1	rs10739286	C	T	-0.0564	0.010318	4.592e-08	0.20991	35366	0.00084414	29.8774
SVEP1	rs10759430	C	A	0.1085	0.008879	2.452e-34	0.33266	35362	0.00420499	149.316
SVEP1	rs10817080	G	A	0.0671	0.011714	1.014e-08	0.14962	35363	0.000927006	32.8103
SVEP1	rs10980234	G	A	-0.0898	0.015581	8.238e-09	0.07827	35365	0.000938384	33.2152
SVEP1	rs10980324	C	T	-0.1863	0.023705	3.87e-15	0.03093	35359	0.00174376	61.762
SVEP1	rs10980453	A	G	-0.1232	0.014684	4.86e-17	0.08921	35362	0.0019867	70.3895
SVEP1	rs111718653	T	C	-0.121	0.020753	5.527e-09	0.04257	35363	0.000960379	33.9926
SVEP1	rs113632189	T	C	0.1566	0.025297	6e-10	0.02923	35359	0.00108262	38.3196
SVEP1	rs11375924	ATGAAAGAA	ATGAAAG	0.0638	0.009857	9.619e-11	0.23642	35364	0.00118325	41.8916
SVEP1	rs117352212	T	C	0.2756	0.034156	7.094e-16	0.01496	35359	0.00183792	65.1028
SVEP1	rs117584091	C	A	0.2659	0.029954	6.873e-19	0.0202	35361	0.00222349	78.7957
SVEP1	rs117649083	T	A	0.1861	0.026703	3.186e-12	0.0252	35363	0.0013716	48.5678
SVEP1	rs117663452	T	C	0.2241	0.026265	1.434e-17	0.0261	35359	0.00205464	72.7955
SVEP1	rs11792528	G	T	0.1312	0.013161	2.079e-23	0.1163	35358	0.00280274	99.3723
SVEP1	rs1180281	G	A	-0.0833	0.009671	7.114e-18	0.25719	35362	0.00209363	74.1861
SVEP1	rs12000829	C	T	-0.0567	0.008795	1.143e-10	0.35594	35359	0.00117404	41.5595
SVEP1	rs12335442	C	T	-0.0889	0.012426	8.392e-13	0.12916	35363	0.00144532	51.1819
SVEP1	rs12335533	A	G	-0.0687	0.008589	1.257e-15	0.39083	35361	0.001806	63.974
SVEP1	rs12341362	A	G	-0.0794	0.013247	2.047e-09	0.11029	35360	0.00101497	35.9237
SVEP1	rs12344526	C	T	0.1858	0.008333	3.859e-110	0.47416	35362	0.013864	497.123
SVEP1	rs12344614	CGAT	GGAT	0.4205	0.01475	9.107e-179	0.08738	35362	0.0224669	812.687
SVEP1	rs12350013	A	T	-0.0844	0.010993	1.623e-14	0.1748	35363	0.0016641	58.9424
SVEP1	rs12350319	T	C	-0.1151	0.017893	1.253e-10	0.05966	35359	0.0011689	41.3771
SVEP1	rs12685786	T	A	-0.1497	0.019897	5.318e-14	0.04701	35357	0.00159845	56.6036
SVEP1	rs13284095	A	G	0.0599	0.010733	2.391e-08	0.19448	35355	0.000880193	31.1449
SVEP1	rs13285472	G	A	0.3958	0.038247	4.254e-25	0.01266	35366	0.00301896	107.086
SVEP1	rs137950543	ATCTAAAAAAAAAAAAAAT	GTCTAAAAAAAAAAAAAAT	0.1844	0.033723	4.549e-08	0.01677	35359	0.000844894	29.8982
SVEP1	rs138538976	C	G	0.3908	0.027456	5.654e-46	0.02418	35363	0.00569645	202.586
SVEP1	rs139584567	G	A	0.1909	0.03041	3.441e-10	0.01951	35363	0.00111313	39.4053
SVEP1	rs139854432	G	A	0.8285	0.03715	3.581e-110	0.01256	35363	0.0138692	497.328
SVEP1	rs140993001	T	G	0.2087	0.028483	2.352e-13	0.02265	35362	0.00151593	53.6845
SVEP1	rs141937351	A	C	0.205	0.021097	2.555e-22	0.04086	35357	0.00266338	94.4152
SVEP1	rs143426311	T	C	-0.1291	0.017762	3.643e-13	0.0584	35361	0.00149175	52.8256
SVEP1	rs145419292	T	C	0.5093	0.033656	9.888e-52	0.01613	35359	0.00643456	228.98
SVEP1	rs147747761	G	T	0.2013	0.028418	1.405e-12	0.02197	35361	0.00141697	50.1737
SVEP1	rs149834214	T	C	-0.1602	0.02771	7.415e-09	0.02405	35362	0.000944289	33.4216
SVEP1	rs1571260	A	G	0.0884	0.013231	2.372e-11	0.11245	35363	0.00126073	44.637
SVEP1	rs181591311	TCTCA	CCTCA	0.1725	0.019368	5.278e-19	0.04956	35366	0.00223795	79.3203
SVEP1	rs1888990	G	C	-0.2277	0.026349	5.542e-18	0.02598	35364	0.00210727	74.6747
SVEP1	rs1891492	C	A	0.0657	0.010969	2.106e-09	0.17884	35361	0.00101352	35.8734
SVEP1	rs2148583	T	C	0.1104	0.015584	1.399e-12	0.07983	35361	0.00141723	50.1829
SVEP1	rs2151686	C	T	0.2562	0.011151	8.069e-117	0.16944	35360	0.014709	527.845
SVEP1	rs2209815	T	G	-0.0576	0.008498	1.216e-11	0.41756	35358	0.00129766	45.9396
SVEP1	rs2297526	GTACATCTGATTTTT	GTATATCTGATTTTT	0.3244	0.026137	2.261e-35	0.02607	35362	0.00433736	154.037
SVEP1	rs2795053	A	G	0.0856	0.01281	2.349e-11	0.12247	35357	0.00126132	44.6503
SVEP1	rs2795057	C	T	0.0802	0.011261	1.062e-12	0.16587	35359	0.00143243	50.719
SVEP1	rs314449	AAAT	TAAT	-0.1052	0.008542	7.402e-35	0.41861	35361	0.00427099	151.666
SVEP1	rs368616000	GAAAAAAAAAAA	GAAAAAAAAA	0.1533	0.014452	2.744e-26	0.09211	35357	0.00317229	112.513
SVEP1	rs3793532	C	A	0.0507	0.009215	3.751e-08	0.29605	35358	0.000855393	30.2692
SVEP1	rs3983508	C	G	-0.0625	0.009323	2.026e-11	0.28393	35358	0.00126943	44.9391
SVEP1	rs41278435	G	A	-0.1672	0.0195	9.952e-18	0.04891	35362	0.00207474	73.5155
SVEP1	rs41305611	A	T	0.1453	0.01484	1.229e-22	0.08846	35362	0.00270365	95.8603
SVEP1	rs4335197	C	T	0.0719	0.008824	3.692e-16	0.35153	35363	0.00187397	66.3899
SVEP1	rs4460449	C	T	0.1331	0.011366	1.129e-31	0.1643	35360	0.0038632	137.125
SVEP1	rs4461968	C	G	-0.0883	0.012137	3.452e-13	0.13471	35357	0.00149477	52.9266
SVEP1	rs536722	T	C	-0.0678	0.010982	6.678e-10	0.17849	35361	0.00107672	38.1129
SVEP1	rs551517	T	C	-0.0601	0.009627	4.288e-10	0.25623	35363	0.00110088	38.9711
SVEP1	rs555000	A	T	0.1353	0.011956	1.082e-29	0.14295	35361	0.00360852	128.056
SVEP1	rs558028	C	T	-0.2609	0.028224	2.375e-20	0.02263	35362	0.0024106	85.445
SVEP1	rs59862957	A	G	-0.0679	0.011216	1.413e-09	0.16754	35361	0.00103535	36.647
SVEP1	rs61021843	A	C	-0.0581	0.009821	3.299e-09	0.24358	35366	0.000988611	34.9958
SVEP1	rs61751937	C	G	0.7988	0.022781	1e-200	0.03424	35362	0.0336008	1229.44
SVEP1	rs62571297	A	G	0.1394	0.011477	6.035e-34	0.16336	35363	0.00415443	147.518
SVEP1	rs7037137	G	C	0.0973	0.009618	4.68e-24	0.25724	35362	0.00288579	102.337
SVEP1	rs72748038	T	C	-0.1353	0.019034	1.175e-12	0.05276	35362	0.00142685	50.5255
SVEP1	rs72756534	A	C	0.5278	0.0382	2.024e-43	0.01258	35361	0.00536969	190.892
SVEP1	rs72759341	G	A	0.3499	0.030906	1.026e-29	0.01913	35361	0.00361166	128.167
SVEP1	rs73526775	C	G	0.1566	0.02629	2.575e-09	0.02688	35358	0.00100249	35.4795
SVEP1	rs73531552	C	T	0.3824	0.028425	2.966e-41	0.02244	35362	0.00509191	180.972
SVEP1	rs74434194	T	C	-0.1875	0.023125	5.139e-16	0.03412	35362	0.00185565	65.7377
SVEP1	rs75823710	C	T	0.1109	0.017968	6.734e-10	0.05723	35358	0.00107624	38.0925
SVEP1	rs76036622	T	A	-0.1768	0.018992	1.288e-20	0.04974	35360	0.00244483	86.656
SVEP1	rs76112787	C	T	0.1061	0.017272	8.095e-10	0.06563	35362	0.00106597	37.733
SVEP1	rs76665138	A	G	-0.1691	0.010153	2.764e-62	0.21352	35359	0.00778403	277.379
SVEP1	rs76710097	C	T	-0.0726	0.012846	1.588e-08	0.12067	35361	0.000902445	31.9384
SVEP1	rs77048935	A	G	0.4615	0.037184	2.273e-35	0.01356	35362	0.00433717	154.03
SVEP1	rs77585163	G	A	0.1473	0.013282	1.394e-28	0.11282	35359	0.00346634	122.986
SVEP1	rs77939968	A	C	0.2411	0.022285	2.802e-27	0.03652	35362	0.00329911	117.043
SVEP1	rs78229991	C	T	0.1159	0.013771	3.881e-17	0.10385	35358	0.00199931	70.829
SVEP1	rs7853220	T	C	0.0777	0.010327	5.307e-14	0.20686	35359	0.00159845	56.6069
SVEP1	rs78776206	A	G	0.3449	0.027661	1.104e-35	0.02329	35361	0.00437745	155.463
SVEP1	rs79038826	C	T	0.1363	0.018123	5.437e-14	0.05625	35358	0.00159716	56.5597
SVEP1	rs79950608	T	C	0.1511	0.02147	1.956e-12	0.03999	35363	0.00139865	49.5268
SVEP1	rs9409105	A	G	-0.1416	0.016884	5.003e-17	0.06564	35363	0.00198501	70.3317
SVEP1	rs976181	CGATGT	GGATGT	0.0663	0.008427	3.61e-15	0.4904	35361	0.00174742	61.8951
SVEP1	rs9969778	T	A	-0.2214	0.026161	2.609e-17	0.02617	35366	0.00202107	71.618
TBCE	rs10925995	A	C	-0.0754	0.013696	3.687e-08	0.09925	35357	0.000856461	30.3061
TBCE	rs115489469	T	C	-0.12	0.020769	7.564e-09	0.03999	35356	0.000943318	33.3816
TBCE	rs34099250	G	A	-0.0554	0.008512	7.604e-11	0.34948	35349	0.0011969	42.3576
TBCE	rs35623575	A	G	-0.0766	0.00878	2.674e-18	0.31257	35355	0.00214824	76.1104
TBCE	rs903347	T	C	-0.1006	0.008345	1.813e-33	0.38663	35356	0.00409354	145.318
TXNDC5	rs1043784	C	T	-0.1949	0.013075	3.001e-50	0.10918	35364	0.00624394	222.186
TXNDC5	rs113432335	A	G	0.2299	0.02331	6.034e-23	0.03249	35365	0.00274301	97.2677
TXNDC5	rs116160783	A	G	0.1917	0.023094	1.034e-16	0.03267	35367	0.00194448	68.9003
TXNDC5	rs12524921	T	C	0.0577	0.010043	9.181e-09	0.21345	35366	0.000932467	33.0066
TXNDC5	rs13209436	T	C	0.2466	0.033498	1.816e-13	0.0146	35365	0.00153006	54.1906
TXNDC5	rs147067275	A	C	0.2873	0.028193	2.184e-24	0.02327	35363	0.00292797	103.84
TXNDC5	rs148218954	A	G	0.1954	0.031762	7.653e-10	0.01647	35363	0.0010691	37.845
TXNDC5	rs149679123	C	T	0.2454	0.023765	5.373e-25	0.03132	35364	0.00300611	106.623
TXNDC5	rs149742777	A	T	0.5369	0.032627	7.611e-61	0.01536	35364	0.00759903	270.775
TXNDC5	rs149795	T	C	0.0663	0.011335	4.937e-09	0.15629	35364	0.000966502	34.2105
TXNDC5	rs17339636	A	G	0.2015	0.02836	1.203e-12	0.02116	35364	0.00142547	50.4793
TXNDC5	rs198354	C	T	-0.0717	0.008886	7.11e-16	0.30684	35362	0.00183777	65.103
TXNDC5	rs2714319	T	A	0.1449	0.026009	2.532e-08	0.02513	35364	0.000876894	31.0359
TXNDC5	rs4143048	T	C	0.1022	0.012673	7.379e-16	0.11678	35363	0.00183568	65.0307
TXNDC5	rs71559141	G	A	0.1504	0.017063	1.206e-18	0.06	35365	0.00219209	77.6891
TXNDC5	rs72816916	G	A	0.1707	0.018571	3.869e-20	0.05099	35365	0.00238334	84.4835
TXNDC5	rs77324830	G	A	0.0744	0.013209	1.774e-08	0.10884	35363	0.000896329	31.7235
TXNDC5	rs7753905	T	G	0.1024	0.01531	2.253e-11	0.07729	35361	0.0012635	44.7327
TXNDC5	rs79875994	C	A	0.0872	0.014145	7.067e-10	0.09411	35364	0.00107349	38.0017
TXNDC5	rs9328440	G	A	0.0776	0.011925	7.661e-11	0.13712	35363	0.00119602	42.343
TXNDC5	rs9505276	G	A	-0.0613	0.011198	4.396e-08	0.15871	35363	0.000846687	29.9651
FGFBP3	rs10509641	T	C	0.0784	0.012808	9.286e-10	0.11239	35366	0.00105834	37.4667
FGFBP3	rs10786004	C	G	0.054	0.008343	9.655e-11	0.37121	35363	0.00118326	41.8908
FGFBP3	rs10881925	T	C	0.0619	0.008079	1.828e-14	0.46215	35363	0.00165728	58.7005
FGFBP3	rs10881994	T	C	-0.2091	0.018742	6.62e-29	0.04966	35366	0.00350723	124.466
FGFBP3	rs11186737	T	C	-0.2914	0.009057	1e-200	0.26326	35366	0.0284377	1035.11
FGFBP3	rs112273702	A	T	-0.0843	0.015142	2.586e-08	0.07752	35364	0.000875683	30.993
FGFBP3	rs11516919	T	C	0.0653	0.008114	8.416e-16	0.42241	35366	0.001828	64.7637
FGFBP3	rs117486477	A	G	-0.1865	0.020605	1.414e-19	0.04057	35365	0.00231118	81.9196
FGFBP3	rs117915828	C	A	-0.2498	0.036331	6.169e-12	0.01213	35366	0.00133495	47.2722
FGFBP3	rs12098856	A	G	-0.1127	0.018693	1.65e-09	0.05027	35362	0.00102685	36.3467
FGFBP3	rs12778642	T	G	0.0451	0.008112	2.701e-08	0.47081	35364	0.000873286	30.9081
FGFBP3	rs140600352	G	A	-0.1653	0.028996	1.193e-08	0.0196	35364	0.000918141	32.4971
FGFBP3	rs141655614	G	A	0.1732	0.028358	1.011e-09	0.02008	35366	0.00105366	37.301
FGFBP3	rs2260518	G	A	0.1172	0.00842	4.856e-44	0.34958	35364	0.00544875	193.734
FGFBP3	rs2488053	A	G	-0.0533	0.008285	1.251e-10	0.3893	35364	0.00116896	41.3852
FGFBP3	rs34029408	T	G	0.117	0.018346	1.801e-10	0.05181	35362	0.00114882	40.6691
FGFBP3	rs34364047	C	A	0.1035	0.009886	1.188e-25	0.20822	35366	0.00308965	109.601
FGFBP3	rs4933680	T	G	-0.1777	0.015229	1.85e-31	0.07518	35366	0.00383511	136.147
FGFBP3	rs55869633	T	C	0.1208	0.01955	6.444e-10	0.04384	35364	0.00107848	38.1782
FGFBP3	rs61862270	A	G	-0.1866	0.030235	6.76e-10	0.01813	35365	0.00107588	38.0872
FGFBP3	rs7101083	GCCCCCCCCCTT	ACCCCCCCCCTT	0.099	0.008111	2.916e-34	0.42184	35364	0.00419502	148.969
FGFBP3	rs71484272	TTTTTTC	TC	-0.1703	0.012482	2.192e-42	0.11782	35366	0.00523595	186.139
FGFBP3	rs72807207	A	G	-0.1865	0.018096	6.628e-25	0.05336	35366	0.00299436	106.211
FGFBP3	rs73313432	G	A	0.1369	0.024774	3.279e-08	0.02769	35365	0.000862713	30.5344
FGFBP3	rs74516805	A	G	-0.1566	0.01924	3.98e-16	0.04727	35362	0.00186992	66.2443
FGFBP3	rs77029981	C	T	-0.2455	0.020048	1.773e-34	0.04226	35366	0.00422219	149.946
FGFBP3	rs78567669	G	A	-0.2176	0.031374	4.044e-12	0.01568	35366	0.00135832	48.1009
FGFBP3	rs79204401	A	G	-0.2673	0.030393	1.434e-18	0.01904	35366	0.00218231	77.3439
FGFBP3	rs79611925	G	A	-0.2203	0.02537	3.839e-18	0.02644	35366	0.00212754	75.3986
UROS	rs11818290	A	G	-0.121	0.008545	1.601e-45	0.35272	35365	0.0056379	200.504
UROS	rs12765966	T	C	-0.0677	0.009276	2.919e-13	0.26825	35358	0.00150423	53.2637
UROS	rs139140866	TA	T	0.156	0.023854	6.163e-11	0.02937	35365	0.00120789	42.7664
UROS	rs139956891	G	A	-0.1651	0.018725	1.175e-18	0.05045	35366	0.00219337	77.7367
UROS	rs141083658	A	G	0.2284	0.041136	2.819e-08	0.01056	35359	0.000871103	30.8265
UROS	rs143364089	T	A	0.1481	0.017598	3.912e-17	0.06044	35366	0.00199861	70.8205
UROS	rs144636904	T	C	0.1729	0.030151	9.779e-09	0.01904	35370	0.000928855	32.8823
UROS	rs1935451	A	G	-0.2956	0.013006	2.33e-114	0.11027	35365	0.0143963	516.531
UROS	rs35214304	G	T	-0.0805	0.012868	3.95e-10	0.11525	35365	0.00110539	39.1332
UROS	rs36123989	A	G	0.1734	0.027797	4.427e-10	0.02366	35366	0.0010991	38.9115
UROS	rs56083862	T	G	-0.0931	0.015792	3.735e-09	0.07325	35366	0.000981776	34.7537
UROS	rs6597746	A	G	-0.0703	0.011093	2.337e-10	0.16283	35366	0.00113432	40.1595
UROS	rs76963417	A	G	0.2431	0.024749	9.009e-23	0.02791	35366	0.00272073	96.4784
UROS	rs7893898	T	C	0.1038	0.017043	1.126e-09	0.06191	35364	0.00104782	37.0918
UROS	rs79459541	A	G	0.0874	0.014825	3.734e-09	0.08442	35352	0.000982184	34.7543
TNR	rs17305076	T	G	-0.0803	0.008473	2.617e-21	0.35644	35340	0.00253506	89.8115
TNR	rs2235256	G	A	-0.1315	0.008083	1.667e-59	0.4708	35340	0.0074336	264.656
TNR	rs60977856	G	C	0.1269	0.020178	3.195e-10	0.04044	35342	0.00111787	39.5496
TNR	rs6692146	T	C	-0.0522	0.00813	1.356e-10	0.47454	35340	0.00116516	41.2226
TNR	rs72725491	A	G	-0.0807	0.012401	7.647e-11	0.12262	35341	0.00119684	42.3457
APOL1	rs112285748	A	G	0.1159	0.017661	5.288e-11	0.05487	35358	0.00121652	43.0637
APOL1	rs112441180	A	G	-0.222	0.03089	6.632e-13	0.01609	35359	0.0014586	51.6471
APOL1	rs112900962	TAAC	TAA	0.0464	0.008218	1.644e-08	0.41349	35362	0.00090069	31.8771
APOL1	rs117032746	G	A	-0.2199	0.035587	6.443e-10	0.01191	35360	0.00107867	38.1806
APOL1	rs12158108	T	G	0.0463	0.008119	1.178e-08	0.45542	35356	0.000918956	32.5186
APOL1	rs13054657	T	C	-0.1163	0.014213	2.778e-16	0.08809	35373	0.00188927	66.952
APOL1	rs132667	A	G	0.0471	0.008192	8.946e-09	0.43267	35364	0.000933888	33.055
APOL1	rs132744	C	T	0.1491	0.016482	1.478e-19	0.06239	35363	0.00230878	81.8297
APOL1	rs136148	T	C	0.3517	0.007031	1e-200	0.2486	35358	0.0660889	2501.99
APOL1	rs136179	C	T	0.1948	0.008295	5.765e-122	0.37268	35357	0.0153585	551.468
APOL1	rs139914131	A	G	-0.173	0.027413	2.776e-10	0.02158	35361	0.00112503	39.8249
APOL1	rs140776666	C	T	-0.2565	0.038339	2.226e-11	0.01201	35362	0.00126417	44.7578
APOL1	rs143094281	A	G	0.0873	0.015101	7.427e-09	0.0793	35363	0.000944186	33.4189
APOL1	rs147288294	A	G	-0.3807	0.032231	3.406e-32	0.01533	35363	0.0039297	139.506
APOL1	rs151210481	C	G	0.132	0.019002	3.743e-12	0.048	35358	0.00136292	48.253
APOL1	rs200208636	GT	G	-0.6436	0.040583	1.221e-56	0.01011	35362	0.00706202	251.489
APOL1	rs2187775	G	T	-0.0802	0.009222	3.433e-18	0.26398	35358	0.00213443	75.6265
APOL1	rs3218356	A	G	-0.1604	0.023247	5.205e-12	0.02991	35363	0.00134444	47.6048
APOL1	rs33999668	C	T	0.1332	0.01925	4.538e-12	0.04695	35364	0.00135207	47.8765
APOL1	rs3830104	C	T	0.0839	0.0131	1.509e-10	0.10287	35368	0.00115842	41.0163
APOL1	rs41302583	G	C	-0.2827	0.017513	1.278e-58	0.05753	35359	0.00731546	260.559
APOL1	rs4419330	C	T	0.1883	0.015033	5.387e-36	0.07812	35359	0.0044176	156.886
APOL1	rs4821504	CTTTCTTTTTTT	CTTTCTTTCTTT	0.0563	0.008411	2.177e-11	0.37306	35365	0.00126531	44.802
APOL1	rs56230516	C	T	0.1431	0.018659	1.73e-14	0.0502	35362	0.00166052	58.8136
APOL1	rs56953345	G	A	-0.0649	0.01114	5.691e-09	0.15665	35358	0.000958991	33.9386
APOL1	rs5756232	ATGCAAGTTCA	ATGCAAGTTCT	0.1196	0.019809	1.563e-09	0.04442	35359	0.00102989	36.4513
APOL1	rs62228792	A	G	-0.0877	0.013579	1.057e-10	0.09801	35364	0.00117812	41.7099
APOL1	rs62233843	C	T	0.1059	0.011357	1.11e-20	0.15111	35357	0.00245314	86.9441
APOL1	rs7289244	TCCATATCGTGATGATTTCATCT	TCCATATCGTGATGATTTCATCC	-0.1117	0.017688	2.699e-10	0.05637	35359	0.00112657	39.8772
APOL1	rs73169657	A	G	0.1517	0.027709	4.379e-08	0.02264	35373	0.000846622	29.9713
APOL1	rs738280	A	C	0.0691	0.008542	6.015e-16	0.34397	35374	0.0018465	65.4353
APOL1	rs74865964	G	T	-0.1385	0.017761	6.299e-15	0.05471	35362	0.00171665	60.8051
APOL1	rs74957801	A	G	-0.0873	0.014796	3.63e-09	0.07937	35360	0.000983559	34.8109
APOL1	rs75375644	A	C	-0.1296	0.022608	9.902e-09	0.03242	35363	0.000928396	32.8595
APOL1	rs77559959	A	G	-0.3737	0.036738	2.646e-24	0.01163	35363	0.00291741	103.464
APOL1	rs9610316	A	G	-0.0581	0.008423	5.284e-12	0.36185	35358	0.00134384	47.5767
APOL1	rs9610482	T	C	-0.0893	0.010409	9.583e-18	0.18708	35359	0.00207722	73.597
APOL1	rs9619616	A	G	-0.0558	0.008541	6.429e-11	0.33902	35364	0.0012055	42.6802
HIBCH	rs10171127	GTCTCAAAAAAAA	ATCTCAAAAAAAA	-0.113	0.008078	1.813e-44	0.413	35367	0.00550243	195.67
HIBCH	rs1074247	A	C	0.1267	0.020595	7.646e-10	0.03853	35369	0.00106891	37.8447
HIBCH	rs112590960	A	C	0.1411	0.024616	9.926e-09	0.02649	35367	0.000928149	32.8545
HIBCH	rs113047810	C	T	-0.1616	0.019397	7.996e-17	0.04403	35367	0.00195868	69.4047
HIBCH	rs113409167	C	T	-0.189	0.011616	1.588e-59	0.13418	35368	0.00742953	264.719
HIBCH	rs11396180	TTG	TG	-0.1663	0.010616	2.637e-55	0.16941	35367	0.00689067	245.379
HIBCH	rs114148522	T	G	-0.1119	0.019886	1.832e-08	0.0406	35364	0.000894572	31.6622
HIBCH	rs114300649	A	C	-0.2233	0.027203	2.236e-16	0.02043	35369	0.00190149	67.3782
HIBCH	rs114962169	A	C	0.1069	0.015556	6.334e-12	0.06863	35366	0.0013335	47.221
HIBCH	rs115150852	G	A	0.1575	0.026486	2.739e-09	0.02356	35367	0.00099884	35.3593
HIBCH	rs116168094	T	C	0.139	0.022387	5.333e-10	0.03226	35363	0.00108897	38.549
HIBCH	rs116275586	A	G	-0.1136	0.020433	2.703e-08	0.03906	35362	0.000873325	30.9078
HIBCH	rs116305095	A	T	-0.1686	0.027623	1.037e-09	0.0229	35369	0.00105219	37.2519
HIBCH	rs1263115	G	A	0.0848	0.010243	1.247e-16	0.18335	35368	0.00193413	68.5351
HIBCH	rs12693570	A	C	0.122	0.010826	1.874e-29	0.16012	35369	0.0035777	126.987
HIBCH	rs13010343	A	G	0.1233	0.012534	7.756e-23	0.11249	35363	0.00272905	96.7659
HIBCH	rs13409203	G	A	0.1475	0.012436	1.886e-32	0.11497	35369	0.00396165	140.669
HIBCH	rs138833075	A	C	-0.2353	0.019321	4.055e-34	0.04303	35369	0.00417585	148.306
HIBCH	rs143457746	A	G	-0.2172	0.026697	4.093e-16	0.0228	35369	0.00186793	66.1866
HIBCH	rs1435139	G	T	-0.0515	0.009246	2.546e-08	0.2447	35360	0.000876624	31.0229
HIBCH	rs144775951	G	A	0.1096	0.018674	4.384e-09	0.04619	35359	0.000973248	34.4447
HIBCH	rs149278148	C	T	-0.1405	0.016983	1.307e-16	0.05859	35368	0.00193141	68.4383
HIBCH	rs149836304	A	G	0.1637	0.016616	6.715e-23	0.06101	35369	0.00273673	97.0554
HIBCH	rs17439672	C	G	0.0763	0.013686	2.476e-08	0.09309	35364	0.000878118	31.0793
HIBCH	rs17585575	T	C	-0.1778	0.02444	3.464e-13	0.0277	35363	0.00149439	52.922
HIBCH	rs17769459	T	C	-0.1187	0.020314	5.121e-09	0.04103	35362	0.000964616	34.1418
HIBCH	rs2067385	C	T	-0.1735	0.018992	6.512e-20	0.04711	35369	0.00235403	83.4513
HIBCH	rs2582770	C	A	0.3255	0.006959	1e-200	0.38746	35369	0.0582532	2187.68
HIBCH	rs291467	G	A	0.14	0.024941	1.986e-08	0.02661	35369	0.000890059	31.5068
HIBCH	rs34675442	A	G	0.0828	0.014852	2.473e-08	0.0785	35361	0.000878182	31.0789
HIBCH	rs34752171	G	T	0.1684	0.010563	3.241e-57	0.16429	35369	0.00713472	254.147
HIBCH	rs34997637	A	G	-0.0815	0.009606	2.164e-17	0.22115	35364	0.00203135	71.9789
HIBCH	rs35178261	C	A	-0.1465	0.023448	4.164e-10	0.02932	35364	0.00110261	39.0336
HIBCH	rs35672585	A	G	-0.0696	0.01083	1.306e-10	0.1609	35361	0.00116662	41.2988
HIBCH	rs3791778	CCTTTTTTTTTTTTTTGCTA	TCTTTTTTTTTTTTTTGCTA	0.104	0.014255	2.975e-13	0.08597	35358	0.00150311	53.224
HIBCH	rs45539732	C	T	-0.1399	0.022214	3.016e-10	0.03248	35364	0.0011203	39.6604
HIBCH	rs4853638	C	A	0.0503	0.007986	3.012e-10	0.49275	35361	0.00112064	39.6691
HIBCH	rs58515841	T	A	-0.1016	0.009265	5.553e-28	0.24296	35368	0.00338853	120.246
HIBCH	rs62184288	G	A	0.11	0.017896	7.912e-10	0.05267	35359	0.00106736	37.7789
HIBCH	rs62186787	C	T	0.123	0.018525	3.144e-11	0.04828	35360	0.0012452	44.0828
HIBCH	rs72905384	C	T	0.1116	0.017758	3.292e-10	0.05269	35360	0.00111569	39.4926
HIBCH	rs72915405	G	A	0.0955	0.009295	9.236e-25	0.24431	35364	0.00297613	105.556
HIBCH	rs72915480	A	C	0.1335	0.016045	8.782e-17	0.06562	35369	0.00195349	69.2243
HIBCH	rs72916273	G	A	0.0839	0.014008	2.106e-09	0.08762	35357	0.00101357	35.8713
HIBCH	rs73049729	C	A	-0.1436	0.013793	2.206e-25	0.09132	35361	0.00305589	108.384
HIBCH	rs751219	G	C	-0.1306	0.020976	4.779e-10	0.03703	35368	0.00109485	38.7629
HIBCH	rs75619169	C	G	0.0638	0.010244	4.721e-10	0.1858	35368	0.00109551	38.7862
HIBCH	rs7563737	C	T	-0.0715	0.011944	2.149e-09	0.12674	35358	0.00101248	35.8334
HIBCH	rs75949659	A	C	0.0891	0.012272	3.858e-13	0.11961	35359	0.0014886	52.7109
HIBCH	rs77124718	T	C	-0.2839	0.037951	7.389e-14	0.01105	35369	0.0015797	55.9577
HIBCH	rs77549534	A	G	-0.1892	0.029558	1.543e-10	0.01967	35358	0.00115745	40.9702
HIBCH	rs77768906	C	T	-0.1405	0.019181	2.393e-13	0.04624	35360	0.00151509	53.652
HIBCH	rs78925766	A	G	-0.1841	0.03251	1.489e-08	0.01409	35361	0.000906057	32.0663
HIBCH	rs887695	T	C	-0.0679	0.008606	3.027e-15	0.3052	35368	0.00175696	62.2461
STAMBPL1	rs111980233	C	T	0.0765	0.010535	3.828e-13	0.17772	35347	0.00148955	52.7265
STAMBPL1	rs1147604	A	G	0.1047	0.008029	7.25e-39	0.49168	35348	0.00478764	170.038
STAMBPL1	rs17438148	A	G	0.0805	0.014738	4.706e-08	0.07987	35348	0.000843303	29.8325
STAMBPL1	rs303510	C	T	-0.0626	0.008299	4.591e-14	0.37629	35347	0.00160711	56.8948
STAMBPL1	rs814637	G	A	-0.0518	0.008573	1.519e-09	0.32698	35348	0.00103176	36.5064
LYPLAL1	rs115827712	A	G	0.191	0.027872	7.25e-12	0.02045	35350	0.00132667	46.9576
LYPLAL1	rs2152786	CTAGACGGATAGGTAGATTGATAGATAGATAGATA	CTAGACGGATAGGTAGATAGATAGATAGATAGATA	0.1081	0.015176	1.057e-12	0.07594	35351	0.00143322	50.7355
LYPLAL1	rs75060212	G	T	0.1481	0.011724	1.41e-36	0.1337	35349	0.00449392	159.564
LYPLAL1	rs7532585	T	C	0.0644	0.008283	7.529e-15	0.38512	35349	0.00170717	60.4466
PLEKHA1	rs10788274	A	G	-0.282	0.007999	1e-200	0.4337	35372	0.0339445	1242.8
PLEKHA1	rs10887112	T	C	0.0589	0.008256	9.729e-13	0.39488	35371	0.00143688	50.894
PLEKHA1	rs11200510	T	C	-0.1346	0.015048	3.721e-19	0.07794	35371	0.00225686	80.0033
PLEKHA1	rs11200558	C	T	-0.1555	0.013519	1.285e-30	0.09951	35372	0.00372641	132.296
PLEKHA1	rs11200615	G	C	-0.1451	0.016173	2.923e-19	0.06563	35373	0.00227036	80.4876
PLEKHA1	rs11248373	C	T	-0.0448	0.008103	3.227e-08	0.45599	35373	0.00086341	30.5661
PLEKHA1	rs118116505	G	A	0.114	0.020187	1.631e-08	0.0426	35370	0.000900823	31.889
PLEKHA1	rs12763004	A	T	-0.0998	0.013889	6.693e-13	0.09404	35372	0.00145756	51.6291
PLEKHA1	rs138725746	A	G	0.279	0.020344	8.367e-43	0.03961	35372	0.00528899	188.066
PLEKHA1	rs142677258	CCCGGCCTGAT	CCCGGCCTGA	-0.0856	0.008601	2.469e-23	0.32767	35368	0.0027927	99.0433
PLEKHA1	rs150990184	A	G	-0.1338	0.020436	5.861e-11	0.04049	35372	0.00121042	42.8643
PLEKHA1	rs17559976	C	T	0.2104	0.017673	1.112e-32	0.05324	35370	0.00399116	141.725
PLEKHA1	rs2295876	A	T	0.0893	0.012334	4.476e-13	0.1205	35371	0.00147981	52.4168
PLEKHA1	rs2420998	C	T	0.0967	0.015763	8.541e-10	0.07049	35366	0.00106299	37.6314
PLEKHA1	rs2672584	C	T	0.0652	0.008083	7.264e-16	0.42072	35371	0.00183613	65.0617
PLEKHA1	rs2672599	AC	AA	-0.0799	0.009592	8.096e-17	0.22416	35373	0.00195773	69.3826
PLEKHA1	rs2975747	G	A	-0.063	0.010274	8.685e-10	0.19148	35370	0.00106195	37.5991
PLEKHA1	rs35176001	A	G	-0.057	0.008628	3.936e-11	0.32803	35370	0.00123242	43.642
PLEKHA1	rs3763763	A	C	-0.0934	0.009115	1.216e-24	0.2683	35371	0.00295969	104.992
PLEKHA1	rs4752657	G	C	0.0534	0.009107	4.537e-09	0.26977	35361	0.000971371	34.3801
PLEKHA1	rs4752689	A	G	-0.0959	0.00818	9.683e-32	0.39546	35373	0.00387057	137.438
PLEKHA1	rs55876400	G	C	0.2429	0.018699	1.392e-38	0.04932	35370	0.00474806	168.731
PLEKHA1	rs56029239	T	C	0.0964	0.01315	2.29e-13	0.10076	35370	0.00151708	53.7376
PLEKHA1	rs7068066	T	C	0.1555	0.009918	2.143e-55	0.20204	35372	0.00690153	245.803
PLEKHA1	rs7093894	A	C	0.1306	0.012062	2.547e-27	0.12907	35373	0.00330323	117.226
PLEKHA1	rs71301564	AT	A	-0.0558	0.008305	1.83e-11	0.38148	35373	0.00127457	45.1403
PLEKHA1	rs72839746	T	C	0.1406	0.01918	2.293e-13	0.04725	35374	0.00151681	53.734
PLEKHA1	rs736457	G	C	0.09	0.01291	3.143e-12	0.10949	35371	0.00137211	48.5968
PLEKHA1	rs736960	T	C	0.0949	0.013495	2.036e-12	0.10091	35371	0.00139615	49.4495
PLEKHA1	rs75284708	A	G	-0.1813	0.0253	7.717e-13	0.02677	35371	0.0014497	51.3488
PLEKHA1	rs76773975	A	G	-0.1133	0.016683	1.112e-11	0.06357	35373	0.00130219	46.1198
PLEKHA1	rs76834025	T	C	0.1117	0.016715	2.346e-11	0.06286	35367	0.00126109	44.6549
PLEKHA1	rs78979917	G	A	0.1505	0.027224	3.234e-08	0.02333	35371	0.00086327	30.5594
TAX1BP3	rs111526586	A	C	0.1454	0.022978	2.485e-10	0.03211	35355	0.00113126	40.0387
TAX1BP3	rs160589	A	G	0.1704	0.030581	2.517e-08	0.01811	35355	0.000877412	31.0464
TAX1BP3	rs222773	G	C	0.0891	0.008137	6.651e-28	0.46145	35355	0.00337991	119.895
TAX1BP3	rs2976235	T	G	-0.048	0.008714	3.624e-08	0.32139	35355	0.00085748	30.3405
HPGDS	rs111907756	CAAAACA	CAAAAAA	0.1291	0.018679	4.79e-12	0.05008	35328	0.00135033	47.7662
HPGDS	rs112279457	C	T	0.2101	0.015913	8.399e-40	0.06852	35334	0.00490928	174.31
HPGDS	rs112920510	A	G	0.2003	0.016628	2.032e-33	0.0609	35331	0.00409021	145.097
HPGDS	rs113036501	A	G	-0.2185	0.014757	1.329e-49	0.08036	35331	0.00616686	219.221
HPGDS	rs114322418	C	T	-0.3211	0.034233	6.606e-21	0.01448	35335	0.00248374	87.9764
HPGDS	rs114408444	G	A	-0.2214	0.033275	2.86e-11	0.01504	35327	0.00125161	44.2685
HPGDS	rs115513374	T	C	0.2867	0.026531	3.218e-27	0.02442	35335	0.0032939	116.768
HPGDS	rs116232009	TGAA	CGAA	-0.5308	0.035095	1.112e-51	0.01327	35335	0.00643226	228.742
HPGDS	rs11723922	G	A	-0.0517	0.00806	1.414e-10	0.4907	35327	0.00116332	41.1421
HPGDS	rs11735510	A	G	0.0715	0.008109	1.169e-18	0.47074	35335	0.00219542	77.7415
HPGDS	rs11737434	C	T	0.0443	0.00812	4.881e-08	0.44853	35328	0.000841803	29.7626
HPGDS	rs12507487	G	A	0.0914	0.011532	2.271e-15	0.14364	35334	0.00177468	62.8143
HPGDS	rs12642618	C	G	-0.2116	0.026076	4.87e-16	0.02724	35334	0.00186015	65.8453
HPGDS	rs1370811	A	G	0.2141	0.024077	5.985e-19	0.02777	35335	0.00223281	79.0686
HPGDS	rs138289160	C	A	0.276	0.039808	4.114e-12	0.01051	35338	0.00135845	48.0676
HPGDS	rs139664777	A	C	0.1447	0.020033	5.078e-13	0.04421	35334	0.00147439	52.17
HPGDS	rs142476634	C	T	0.3593	0.029529	4.613e-34	0.01897	35334	0.00417261	148.045
HPGDS	rs1433647	T	C	-0.0515	0.008211	3.56e-10	0.4253	35337	0.00111201	39.3367
HPGDS	rs144260693	A	G	-0.2507	0.025023	1.262e-23	0.02656	35333	0.00283281	100.37
HPGDS	rs145267999	T	C	-0.2641	0.029847	8.866e-19	0.01843	35333	0.00221102	78.2908
HPGDS	rs145410859	A	G	-0.2958	0.018169	1.362e-59	0.05239	35333	0.00744574	265.039
HPGDS	rs147590909	A	C	-0.2219	0.030758	5.414e-13	0.01675	35331	0.00147097	52.0444
HPGDS	rs149344903	G	A	-0.2682	0.034763	1.208e-14	0.01288	35334	0.00168174	59.5194
HPGDS	rs149640868	A	G	-0.2817	0.038116	1.462e-13	0.0111	35335	0.00154342	54.6178
HPGDS	rs150395993	A	G	0.1874	0.01993	5.307e-21	0.04368	35334	0.00249601	88.4097
HPGDS	rs1544387	TAAAT	TAAAG	0.051	0.008119	3.352e-10	0.43654	35331	0.00111556	39.4558
HPGDS	rs17276536	A	G	0.1618	0.026061	5.351e-10	0.02516	35336	0.00108964	38.5434
HPGDS	rs183119811	C	T	0.1435	0.018996	4.213e-14	0.04784	35327	0.00161277	57.063
HPGDS	rs185580660	A	G	0.1358	0.017153	2.429e-15	0.05809	35334	0.00177075	62.6751
HPGDS	rs188552194	T	C	-0.2389	0.03438	3.683e-12	0.01382	35322	0.00136516	48.2832
HPGDS	rs190664766	T	C	-0.1181	0.020967	1.774e-08	0.0397	35336	0.000897057	31.7251
HPGDS	rs201768842	TA	T	0.1229	0.016387	6.4e-14	0.06562	35336	0.00158927	56.2445
HPGDS	rs2196079	T	C	-0.0513	0.008087	2.248e-10	0.47345	35339	0.0011374	40.2379
HPGDS	rs2578155	G	C	-0.1383	0.008168	2.62e-64	0.40358	35334	0.00804842	286.674
HPGDS	rs282451	T	C	-0.2565	0.030674	6.153e-17	0.01727	35334	0.00197507	69.9213
HPGDS	rs28583714	T	C	-0.1003	0.012416	6.573e-16	0.12225	35322	0.00184413	65.255
HPGDS	rs28742872	T	C	0.3586	0.026861	1.184e-40	0.02349	35333	0.00501892	178.218
HPGDS	rs35170469	G	A	0.0512	0.00823	4.945e-10	0.40139	35336	0.00109408	38.7004
HPGDS	rs374537558	TG	T	0.4586	0.006366	1e-200	0.34578	35334	0.128064	5189.32
HPGDS	rs3924764	C	T	-0.1413	0.011435	4.459e-35	0.14602	35330	0.00430324	152.682
HPGDS	rs4264798	A	G	0.0559	0.008321	1.838e-11	0.3771	35332	0.0012757	45.1282
HPGDS	rs4640631	T	C	0.0725	0.010691	1.188e-11	0.17375	35331	0.00129993	45.9848
HPGDS	rs4692996	C	T	-0.0629	0.00823	2.129e-14	0.39793	35334	0.00165041	58.4086
HPGDS	rs4693346	C	T	-0.0566	0.009284	1.084e-09	0.2568	35330	0.0010509	37.1653
HPGDS	rs4699582	C	T	-0.0716	0.008178	2.036e-18	0.43435	35326	0.00216519	76.6491
HPGDS	rs56028059	G	T	0.3274	0.032996	3.325e-23	0.0147	35334	0.00277865	98.4487
HPGDS	rs56273473	CTACTGTT	TTACTGTT	-0.1988	0.025151	2.692e-15	0.02613	35334	0.00176507	62.4738
HPGDS	rs56278870	C	A	-0.148	0.019391	2.304e-14	0.04413	35333	0.00164599	58.2503
HPGDS	rs57322026	T	G	0.2414	0.02219	1.456e-27	0.0337	35336	0.00333803	118.341
HPGDS	rs62310110	A	G	0.2634	0.025937	3.131e-24	0.02231	35336	0.00291011	103.126
HPGDS	rs62319427	G	A	-0.1366	0.023277	4.4e-09	0.03172	35334	0.000973714	34.4368
HPGDS	rs62320435	T	G	0.109	0.019373	1.84e-08	0.04374	35334	0.000895112	31.6544
HPGDS	rs62320697	A	G	0.0782	0.010817	4.851e-13	0.16498	35329	0.00147716	52.2607
HPGDS	rs6813484	C	T	0.3913	0.007941	1e-200	0.18339	35334	0.0643003	2427.98
HPGDS	rs6818762	G	A	-0.2742	0.016506	5.735e-62	0.06231	35333	0.00774982	275.948
HPGDS	rs6850673	C	T	-0.082	0.011541	1.2e-12	0.14197	35329	0.00142689	50.4796
HPGDS	rs71581583	CGTCTCAAAAAAAAAAAAAAAAAAAG	CGTCTCAAAAAAAAAG	0.1075	0.013613	2.859e-15	0.09954	35332	0.00176188	62.3569
HPGDS	rs72659548	G	C	-0.1045	0.010505	2.575e-23	0.17983	35334	0.00279276	98.95
HPGDS	rs72663712	C	T	-0.1482	0.019591	3.892e-14	0.0459	35335	0.00161687	57.2214
HPGDS	rs72663742	G	T	-1.0343	0.01713	1e-200	0.03305	35334	0.0935277	3645.47
HPGDS	rs72667616	T	G	-0.2683	0.018418	4.553e-48	0.05161	35332	0.00597018	212.193
HPGDS	rs72671298	A	G	0.1205	0.020263	2.735e-09	0.04041	35328	0.00100003	35.3624
HPGDS	rs72874967	T	C	0.2278	0.03416	2.581e-11	0.01419	35338	0.00125685	44.468
HPGDS	rs73842453	T	A	0.1025	0.013065	4.322e-15	0.1061	35334	0.00173892	61.5466
HPGDS	rs74878305	G	T	-0.1738	0.028194	7.07e-10	0.02115	35334	0.0010743	37.9981
HPGDS	rs7669103	C	G	-0.1976	0.008116	6.293e-131	0.4319	35322	0.016505	592.741
HPGDS	rs7689734	C	T	-0.0757	0.009505	1.661e-15	0.23984	35331	0.00179206	63.4254
HPGDS	rs77810775	C	T	-0.1809	0.020933	5.537e-18	0.04016	35336	0.00210902	74.6775
HPGDS	rs79668016	C	A	0.132	0.017229	1.836e-14	0.05648	35338	0.00165831	58.6953
HPGDS	rs80081914	T	A	-0.2585	0.02022	2.002e-37	0.04092	35327	0.00460519	163.431
HPGDS	rs80286792	C	T	0.1213	0.01253	3.643e-22	0.11672	35334	0.00264531	93.7119
HPGDS	rs901615	C	A	-0.4584	0.006366	1e-200	0.3459	35334	0.127967	5184.79
TNFAIP8	rs10071407	A	G	0.0965	0.009753	4.406e-23	0.21261	35353	0.00276154	97.8934
TNFAIP8	rs1035376	A	G	0.2207	0.010836	3.325e-92	0.15924	35353	0.0115978	414.803
TNFAIP8	rs112327168	A	G	-0.1425	0.020158	1.558e-12	0.04144	35354	0.00141151	49.9701
TNFAIP8	rs11739279	T	G	0.2203	0.029403	6.755e-14	0.01834	35353	0.00158537	56.1334
TNFAIP8	rs11960654	C	T	0.1328	0.016501	8.423e-16	0.06178	35353	0.00182875	64.7666
TNFAIP8	rs12188860	A	G	-0.0771	0.009924	7.925e-15	0.19927	35354	0.00170434	60.3546
TNFAIP8	rs13156156	A	G	0.079	0.008362	3.482e-21	0.3452	35351	0.00251847	89.2502
TNFAIP8	rs13160643	T	C	-0.0615	0.009087	1.306e-11	0.2636	35353	0.00129396	45.802
TNFAIP8	rs1368183	G	A	0.0659	0.011187	3.848e-09	0.14682	35354	0.000980571	34.6992
TNFAIP8	rs139320460	ATT	AT	-0.1026	0.016059	1.672e-10	0.06469	35354	0.00115324	40.8163
TNFAIP8	rs144735674	G	C	-0.2512	0.026082	5.899e-22	0.024	35353	0.00261694	92.7541
TNFAIP8	rs28943585	T	A	-0.1127	0.012929	2.855e-18	0.10402	35353	0.00214466	75.979
TNFAIP8	rs2914906	G	A	-0.0515	0.008639	2.5e-09	0.30817	35352	0.00100424	35.5355
TNFAIP8	rs62375111	A	G	-0.1327	0.009114	5.046e-48	0.25039	35353	0.00596075	211.982
TNFAIP8	rs62376995	G	A	-0.2004	0.026912	9.577e-14	0.02175	35354	0.00156597	55.4471
TNFAIP8	rs6882403	G	A	0.0533	0.008782	1.286e-09	0.28345	35354	0.00104082	36.8335
TNFAIP8	rs71585210	G	C	0.2429	0.037161	6.299e-11	0.01178	35353	0.00120706	42.7224
TNFAIP8	rs75431504	C	T	-0.1659	0.024045	5.22e-12	0.02803	35354	0.00134468	47.6013
TNFAIP8	rs75568601	T	C	0.0952	0.012019	2.363e-15	0.12698	35352	0.00177155	62.7354
TNFAIP8	rs79351794	C	T	0.0895	0.016377	4.632e-08	0.06443	35351	0.000844129	29.8643
TRDMT1	rs10795451	C	T	0.3081	0.006824	1e-200	0.49958	35354	0.0545156	2038.36
TRDMT1	rs10904940	G	A	0.0833	0.010393	1.098e-15	0.18659	35351	0.00181392	64.2368
TRDMT1	rs111356732	G	A	0.1903	0.025994	2.465e-13	0.02468	35352	0.00151377	53.5928
TRDMT1	rs111623883	G	A	-0.0528	0.008995	4.352e-09	0.27761	35350	0.000973762	34.4541
TRDMT1	rs11254143	G	A	0.0474	0.008621	3.838e-08	0.32743	35357	0.000854269	30.2285
TRDMT1	rs11254514	C	T	0.0903	0.012141	1.026e-13	0.12367	35353	0.00156229	55.3149
TRDMT1	rs115302257	C	T	0.1918	0.029169	4.853e-11	0.01993	35350	0.00122161	43.2344
TRDMT1	rs11591878	T	C	0.0796	0.013659	5.617e-09	0.09604	35356	0.00095964	33.9597
TRDMT1	rs116993323	A	G	-0.1558	0.027764	2.006e-08	0.0217	35351	0.000889985	31.4881
TRDMT1	rs12146414	G	A	-0.0914	0.012792	8.993e-13	0.11346	35350	0.00144211	51.0494
TRDMT1	rs12414802	A	G	-0.0964	0.016966	1.331e-08	0.06121	35349	0.000912476	32.2828
TRDMT1	rs1290099	C	T	0.0626	0.01126	2.705e-08	0.15333	35351	0.000873556	30.9063
TRDMT1	rs140894469	T	C	0.1632	0.026633	8.909e-10	0.02448	35355	0.00106093	37.547
TRDMT1	rs143203111	T	C	0.1652	0.029007	1.233e-08	0.02011	35352	0.000916647	32.4332
TRDMT1	rs146699208	C	A	0.1207	0.019325	4.219e-10	0.04656	35353	0.00110223	39.0078
TRDMT1	rs146732159	TA	T	-0.0859	0.011289	2.752e-14	0.15001	35353	0.00163508	57.8963
TRDMT1	rs148262320	C	T	-0.1687	0.022828	1.468e-13	0.0337	35355	0.00154232	54.6097
TRDMT1	rs165528	G	C	0.1434	0.022498	1.843e-10	0.03331	35352	0.00114788	40.6243
TRDMT1	rs17432826	A	G	0.1737	0.022549	1.326e-14	0.03281	35355	0.00167558	59.3363
TRDMT1	rs17465759	C	T	0.1577	0.014711	8.212e-27	0.08192	35355	0.0032398	114.909
TRDMT1	rs1753370	C	A	0.0729	0.008103	2.315e-19	0.45747	35349	0.00228451	80.9355
TRDMT1	rs1907361	A	T	0.1106	0.008125	3.389e-42	0.47087	35354	0.0052138	185.284
TRDMT1	rs2251710	A	T	0.0624	0.010689	5.285e-09	0.17215	35349	0.000963162	34.0777
TRDMT1	rs2461139	G	T	-0.0486	0.008302	4.798e-09	0.39604	35343	0.000968685	34.2675
TRDMT1	rs2985837	A	G	-0.0483	0.008306	6.051e-09	0.39562	35344	0.000955827	33.8132
TRDMT1	rs359300	T	C	-0.0923	0.009245	1.793e-23	0.25915	35350	0.00281175	99.6701
TRDMT1	rs3758411	C	G	-0.1535	0.008737	4.232e-69	0.30983	35351	0.00865595	308.651
TRDMT1	rs405337	G	C	-0.0899	0.008514	4.632e-26	0.33751	35353	0.00314382	111.488
TRDMT1	rs433056	C	T	-0.1052	0.009878	1.752e-26	0.21293	35354	0.00319789	113.415
TRDMT1	rs45507399	T	C	-0.1924	0.022686	2.234e-17	0.03254	35354	0.00203036	71.9233
TRDMT1	rs45624432	A	C	0.1311	0.023344	1.955e-08	0.03192	35354	0.00089131	31.5377
TRDMT1	rs55766490	G	A	-0.1378	0.018051	2.275e-14	0.05344	35349	0.0016459	58.2735
TRDMT1	rs55771155	T	C	-0.1483	0.009834	2.191e-51	0.21469	35349	0.00639234	227.404
TRDMT1	rs58214039	C	T	-0.1467	0.023293	3.017e-10	0.03241	35352	0.00112075	39.6629
TRDMT1	rs72775072	G	T	0.1578	0.016389	6.068e-22	0.06475	35355	0.0026153	92.701
TRDMT1	rs74772084	G	T	-0.1402	0.018002	6.814e-15	0.05334	35354	0.00171266	60.6499
TRDMT1	rs74823087	A	T	-0.0686	0.012111	1.477e-08	0.13157	35355	0.000906658	32.0822
TRDMT1	rs75481973	T	C	0.1652	0.025922	1.853e-10	0.0241	35355	0.00114745	40.6124
TRDMT1	rs76001228	T	A	-0.1672	0.01779	5.542e-21	0.054	35356	0.00249215	88.3275
TRDMT1	rs77536950	A	G	-0.091	0.016289	2.314e-08	0.06597	35348	0.000882157	31.2082
TRDMT1	rs78387850	C	T	0.1815	0.028342	1.515e-10	0.02028	35354	0.00115864	41.0079
TRDMT1	rs78799051	G	A	-0.1823	0.022469	4.92e-16	0.03302	35357	0.00185833	65.8235
TRDMT1	rs7894148	A	G	0.0684	0.0103	3.123e-11	0.18809	35354	0.00124583	44.0974
TRDMT1	rs7916688	A	G	0.0794	0.009015	1.282e-18	0.27607	35346	0.00218986	77.5684
TRDMT1	rs79386054	T	C	0.181	0.023342	8.893e-15	0.03203	35351	0.00169801	60.1252
TRDMT1	rs932640	G	A	0.1332	0.0163	3.039e-16	0.06596	35356	0.00188517	66.7742
PTGFRN	rs1013910	A	G	-0.1839	0.012407	1.049e-49	0.13813	35347	0.00617712	219.687
PTGFRN	rs1045666	G	A	-0.1787	0.015022	1.245e-32	0.08951	35355	0.00398665	141.504
PTGFRN	rs10494201	A	G	-0.0874	0.008955	1.669e-22	0.3567	35356	0.00268695	95.2505
PTGFRN	rs10923135	C	T	-0.0719	0.010147	1.379e-12	0.23636	35346	0.00141849	50.2063
PTGFRN	rs10923219	G	A	-0.137	0.008717	1.172e-55	0.41698	35352	0.00693856	246.992
PTGFRN	rs10923260	A	G	0.1201	0.010616	1.135e-29	0.20651	35355	0.00360698	127.979
PTGFRN	rs10923982	C	T	0.085	0.008997	3.467e-21	0.35537	35351	0.00251852	89.252
PTGFRN	rs111364375	A	G	-0.2785	0.030554	7.875e-20	0.01968	35356	0.0023444	83.0787
PTGFRN	rs112581202	C	T	0.2218	0.016207	1.246e-42	0.07741	35353	0.00526983	187.281
PTGFRN	rs113316315	G	C	-0.2698	0.029724	1.118e-19	0.02123	35353	0.00232505	82.3844
PTGFRN	rs113374882	A	G	-0.2043	0.023114	9.683e-19	0.03705	35357	0.00220472	78.1199
PTGFRN	rs113576309	A	G	-0.2005	0.027024	1.177e-13	0.02613	35343	0.00155507	55.0434
PTGFRN	rs114247533	T	C	0.1302	0.017104	2.694e-14	0.06751	35356	0.00163626	57.9431
PTGFRN	rs114329816	T	C	0.2185	0.028696	2.652e-14	0.02415	35347	0.00163755	57.9743
PTGFRN	rs114363288	G	A	-0.4701	0.025984	3.697e-73	0.02799	35347	0.00917514	327.298
PTGFRN	rs114576333	G	A	-0.4816	0.027142	1.921e-70	0.02456	35353	0.00882699	314.822
PTGFRN	rs114732239	T	G	-0.1592	0.026886	3.195e-09	0.02688	35353	0.000990779	35.0598
PTGFRN	rs114799443	C	G	0.1152	0.020973	3.954e-08	0.04393	35351	0.00085273	30.1689
PTGFRN	rs114930134	A	G	-0.2328	0.028043	1.027e-16	0.023	35353	0.00194556	68.9116
PTGFRN	rs114957881	T	G	0.1369	0.024519	2.357e-08	0.03134	35354	0.000881008	31.1729
PTGFRN	rs115869737	A	G	0.1838	0.032228	1.176e-08	0.01864	35345	0.000919384	32.5237
PTGFRN	rs116019118	T	C	0.1323	0.021194	4.308e-10	0.04343	35353	0.001101	38.9645
PTGFRN	rs116493772	A	G	-0.787	0.029649	3.032e-155	0.02039	35352	0.0195409	704.539
PTGFRN	rs116793883	A	G	-0.5293	0.026769	5.094e-87	0.02651	35353	0.010938	390.944
PTGFRN	rs11807958	A	C	0.1986	0.018012	2.855e-28	0.06022	35354	0.00342693	121.565
PTGFRN	rs12023342	G	C	-0.4107	0.008075	1e-200	0.19054	35347	0.0681927	2586.66
PTGFRN	rs12066192	A	G	-0.0676	0.010464	1.046e-10	0.22107	35347	0.00117932	41.7324
PTGFRN	rs12071291	G	C	0.1937	0.009948	1.896e-84	0.25045	35352	0.0106106	379.108
PTGFRN	rs12131886	G	A	0.1582	0.017602	2.523e-19	0.06299	35346	0.00228012	80.7727
PTGFRN	rs12407870	A	G	0.2678	0.021472	1.064e-35	0.03983	35353	0.0043807	155.543
PTGFRN	rs1289667	G	A	0.1377	0.013134	1.024e-25	0.12157	35351	0.00309973	109.913
PTGFRN	rs1289669	C	T	0.3763	0.014108	9.829e-157	0.10024	35352	0.0197274	711.399
PTGFRN	rs1289670	G	C	-0.5341	0.041634	1.138e-37	0.0112	35352	0.00463359	164.56
PTGFRN	rs1289873	C	T	-0.0624	0.00884	1.678e-12	0.38412	35355	0.00140735	49.8242
PTGFRN	rs1342388	A	G	0.0652	0.010868	1.979e-09	0.19398	35354	0.00101699	35.9891
PTGFRN	rs141813165	A	C	0.1607	0.026807	2.038e-09	0.02627	35357	0.00101536	35.9344
PTGFRN	rs142681685	A	G	-0.1786	0.023578	3.596e-14	0.03514	35345	0.00162075	57.3752
PTGFRN	rs143584026	TG	T	0.2533	0.025877	1.258e-22	0.0277	35352	0.00270304	95.8116
PTGFRN	rs143586624	T	C	-0.24	0.028459	3.364e-17	0.0231	35353	0.00200763	71.1146
PTGFRN	rs143934298	G	A	-0.2375	0.027774	1.22e-17	0.0253	35347	0.00206443	73.1183
PTGFRN	rs147035069	T	C	-0.4431	0.036032	9.369e-35	0.01459	35348	0.00425998	151.218
PTGFRN	rs149404692	T	G	0.2453	0.04019	1.038e-09	0.01102	35357	0.00105251	37.2507
PTGFRN	rs150200818	G	C	0.1439	0.025677	2.091e-08	0.02936	35351	0.000887658	31.4057
PTGFRN	rs151060620	G	A	-0.2928	0.03455	2.355e-17	0.01601	35352	0.00202745	71.816
PTGFRN	rs17521050	T	A	0.3601	0.025589	5.592e-45	0.02989	35352	0.00557057	198.023
PTGFRN	rs17575107	C	T	0.1556	0.027173	1.026e-08	0.02638	35353	0.000926649	32.7883
PTGFRN	rs193156923	C	A	0.1813	0.022689	1.343e-15	0.0371	35347	0.00180314	63.847
PTGFRN	rs1998921	A	G	-0.2511	0.021913	2.118e-30	0.04062	35347	0.00370107	131.3
PTGFRN	rs2010970	C	G	-0.0777	0.010188	2.406e-14	0.23557	35351	0.00164266	58.162
PTGFRN	rs201928005	TA	T	-0.542	0.028509	1.361e-80	0.02407	35345	0.0101225	361.418
PTGFRN	rs2491114	T	C	-0.7115	0.013956	1e-200	0.05356	35348	0.0684934	2598.98
PTGFRN	rs2622360	C	A	0.0602	0.009537	2.748e-10	0.28715	35355	0.00112572	39.8423
PTGFRN	rs34257983	T	C	0.2278	0.023957	1.93e-21	0.03372	35352	0.00255105	90.4103
PTGFRN	rs34548240	CAA	CA	-0.078	0.013659	1.125e-08	0.12147	35353	0.000921562	32.6082
PTGFRN	rs35583396	T	C	0.1718	0.028526	1.717e-09	0.02401	35355	0.00102487	36.2694
PTGFRN	rs35840782	C	T	-0.0967	0.009964	2.884e-22	0.24899	35341	0.00265797	94.1805
PTGFRN	rs36109186	T	C	-0.1976	0.029507	2.132e-11	0.02264	35353	0.00126691	44.8435
PTGFRN	rs41275558	G	A	0.1898	0.030845	7.582e-10	0.01941	35351	0.00106993	37.8615
PTGFRN	rs41276570	T	C	0.2246	0.027442	2.734e-16	0.02644	35352	0.00189126	66.9828
PTGFRN	rs41302810	T	C	0.2584	0.025805	1.329e-23	0.02804	35352	0.00282835	100.266
PTGFRN	rs4131407	G	C	0.3443	0.01007	1e-200	0.23252	35350	0.0320108	1168.94
PTGFRN	rs4357512	A	G	-0.251	0.012365	1.32e-91	0.13755	35351	0.0115219	412.035
PTGFRN	rs4433378	G	A	0.2893	0.008576	1e-200	0.43202	35349	0.0311882	1137.9
PTGFRN	rs4659193	TAGAGAGAGAGAGAGA	TATAGAGAGAGAGAGA	0.1014	0.008691	1.87e-31	0.45171	35352	0.00383578	136.117
PTGFRN	rs4659344	G	A	-0.1102	0.00896	9.088e-35	0.35928	35351	0.0042608	151.259
PTGFRN	rs4659352	G	A	-0.1607	0.012475	5.721e-38	0.14119	35351	0.00467213	165.93
PTGFRN	rs4839534	TCCTT	TCCTC	-0.0734	0.009338	3.828e-15	0.31105	35352	0.00174466	61.7817
PTGFRN	rs490121	G	A	0.1287	0.009023	3.693e-46	0.35277	35346	0.00572298	203.437
PTGFRN	rs55704318	A	C	0.2361	0.016818	9.035e-45	0.06953	35354	0.00554358	197.069
PTGFRN	rs56226811	A	G	0.2373	0.024054	5.88e-23	0.03399	35348	0.00274576	97.3187
PTGFRN	rs61317857	A	C	-0.0748	0.010147	1.685e-13	0.24387	35347	0.001535	54.338
PTGFRN	rs61324805	A	G	0.1961	0.032941	2.631e-09	0.01801	35352	0.00100146	35.437
PTGFRN	rs61788000	A	G	-0.1559	0.013133	1.678e-32	0.12267	35353	0.00397018	140.909
PTGFRN	rs61789098	G	A	0.1237	0.019962	5.766e-10	0.05049	35352	0.00108504	38.3978
PTGFRN	rs61789115	A	G	0.095	0.012736	8.709e-14	0.12969	35352	0.00157139	55.6361
PTGFRN	rs61807842	T	C	-0.2335	0.02153	2.093e-27	0.04009	35356	0.00331574	117.615
PTGFRN	rs6701046	G	A	-0.0634	0.010783	4.107e-09	0.1971	35347	0.000977062	34.568
PTGFRN	rs699735	G	A	-0.2472	0.014422	7.441e-66	0.09788	35347	0.00824325	293.779
PTGFRN	rs71668611	C	T	0.1888	0.019786	1.397e-21	0.05084	35347	0.00256932	91.0465
PTGFRN	rs72693718	T	C	-0.1614	0.028311	1.191e-08	0.02354	35353	0.000918483	32.4992
PTGFRN	rs72697402	T	G	-0.509	0.035695	3.91e-46	0.01443	35347	0.00571975	203.328
PTGFRN	rs74446856	T	C	-0.2608	0.034223	2.526e-14	0.01573	35352	0.00164003	58.0704
PTGFRN	rs74517097	G	T	-0.9587	0.027025	1e-200	0.02467	35352	0.0343739	1258.37
PTGFRN	rs7511712	C	T	0.0716	0.009287	1.264e-14	0.31183	35356	0.00167835	59.4361
PTGFRN	rs7522280	C	T	0.0641	0.011601	3.291e-08	0.16439	35355	0.000862779	30.5282
PTGFRN	rs7528606	G	T	-0.0823	0.00923	4.819e-19	0.32921	35352	0.00224392	79.5008
PTGFRN	rs7541142	C	G	-0.0653	0.008676	5.206e-14	0.44389	35353	0.0015998	56.6451
PTGFRN	rs75504818	C	G	0.1537	0.019732	6.729e-15	0.05135	35351	0.0017134	60.671
PTGFRN	rs75693843	G	A	0.2262	0.024622	4.039e-20	0.03161	35345	0.00238218	84.3945
PTGFRN	rs76228471	A	G	0.1693	0.023194	2.894e-13	0.03618	35352	0.00150485	53.2768
PTGFRN	rs76594009	T	G	-0.2514	0.035217	9.432e-13	0.01472	35344	0.00143974	50.9567
PTGFRN	rs76995079	G	T	-0.4737	0.041905	1.252e-29	0.01147	35344	0.0036024	127.776
PTGFRN	rs77311050	T	C	0.1012	0.015401	4.993e-11	0.08781	35352	0.00121989	43.1756
PTGFRN	rs77876907	C	G	-0.4935	0.024432	1.002e-90	0.03119	35352	0.0114093	407.973
PTGFRN	rs78099894	G	A	-0.2723	0.019728	2.465e-43	0.05222	35347	0.00536095	190.504
PTGFRN	rs78129322	A	C	-1.026	0.018676	1e-200	0.02949	35349	0.0786626	3017.88
PTGFRN	rs78896342	G	A	-0.2574	0.025523	6.439e-24	0.02987	35355	0.0028685	101.702
PTGFRN	rs78945263	G	A	0.2202	0.024952	1.095e-18	0.03162	35353	0.00219807	77.8752
PTGFRN	rs79524654	C	G	0.2466	0.038456	1.431e-10	0.01243	35347	0.00116198	41.1181
PTGFRN	rs79759069	TA	TT	0.2913	0.03912	9.602e-14	0.01192	35348	0.00156617	55.4445
PTGFRN	rs797999	G	T	-0.0783	0.010251	2.201e-14	0.22814	35348	0.00164782	58.34
PTGFRN	rs798058	T	C	-0.5545	0.026306	1.24e-98	0.02647	35347	0.0124141	444.292
PTGFRN	rs79833817	A	T	-0.2362	0.021	2.379e-29	0.04279	35354	0.00356559	126.502
PTGFRN	rs80179189	A	T	-0.3464	0.040526	1.257e-17	0.01164	35353	0.00206236	73.0573
PTGFRN	rs826410	A	T	-0.0886	0.008711	2.682e-24	0.41704	35354	0.00291759	103.444
PTGFRN	rs850598	G	T	0.0566	0.009044	3.895e-10	0.34949	35352	0.00110667	39.164
PTGFRN	rs871493	C	G	0.0664	0.012003	3.167e-08	0.1539	35345	0.000865073	30.6007
PTGFRN	rs9645341	T	C	0.134	0.019694	1.018e-11	0.04933	35352	0.00130785	46.2932
ELMO1	rs1647794	G	C	-0.0882	0.01217	4.243e-13	0.11729	35349	0.00148366	52.5208
ELMO1	rs28628397	A	C	-0.0742	0.008907	8.025e-17	0.26767	35350	0.00195931	69.3937
ELMO1	rs56305455	A	G	-0.1081	0.01522	1.226e-12	0.07161	35350	0.001425	50.4426
ELMO1	rs6960995	T	C	0.0604	0.007905	2.155e-14	0.4498	35347	0.00164892	58.3775
ELMO1	rs7782999	T	A	-0.1054	0.010171	3.676e-25	0.18282	35349	0.00302872	107.381
ECI2	rs111900479	AT	AC	-0.3753	0.03124	3.025e-33	0.01644	35378	0.00406288	144.315
ECI2	rs111910690	T	C	0.1211	0.017785	9.809e-12	0.05462	35378	0.00130882	46.3613
ECI2	rs114646807	C	T	0.1721	0.024233	1.23e-12	0.03069	35378	0.00142362	50.4339
ECI2	rs115079589	A	G	-0.222	0.019233	8.057e-31	0.04561	35375	0.00375217	133.225
ECI2	rs115088017	T	C	-0.3486	0.025079	6.307e-44	0.02631	35378	0.0054317	193.201
ECI2	rs115191913	A	G	-0.3346	0.031255	9.595e-27	0.01722	35376	0.00322923	114.601
ECI2	rs115370184	G	A	-0.1717	0.026251	6.127e-11	0.02467	35375	0.00120789	42.7784
ECI2	rs116142648	G	A	0.1784	0.027633	1.074e-10	0.02305	35377	0.0011768	41.6782
ECI2	rs116376071	G	A	-0.1483	0.021805	1.038e-11	0.03403	35371	0.00130604	46.2536
ECI2	rs116727866	G	A	-0.3064	0.038711	2.471e-15	0.01063	35376	0.00176779	62.6447
ECI2	rs1205012	A	C	-0.0468	0.008283	1.605e-08	0.37358	35377	0.000901579	31.9221
ECI2	rs12195496	T	G	0.1053	0.01642	1.427e-10	0.06491	35376	0.00116117	41.1231
ECI2	rs12197988	T	C	-0.0527	0.008414	3.772e-10	0.35236	35378	0.00110765	39.2276
ECI2	rs12210454	G	A	0.1725	0.011082	1.254e-54	0.15902	35378	0.00680212	242.28
ECI2	rs12525331	A	G	-0.0611	0.010329	3.307e-09	0.18544	35375	0.000988189	34.9898
ECI2	rs138410446	ATCAAT	TCAAT	-0.066	0.008239	1.138e-15	0.39988	35375	0.00181074	64.1674
ECI2	rs139354596	A	G	-0.1664	0.027714	1.922e-09	0.0209	35374	0.00101808	36.0482
ECI2	rs139458554	G	C	0.1516	0.024019	2.76e-10	0.02872	35375	0.00112487	39.8349
ECI2	rs142337485	C	T	0.1408	0.023715	2.899e-09	0.03017	35378	0.00099539	35.248
ECI2	rs148419900	T	C	0.1947	0.020948	1.477e-20	0.0389	35375	0.00243608	86.3818
ECI2	rs148479737	T	C	0.163	0.023672	5.748e-12	0.02944	35375	0.00133853	47.4112
ECI2	rs17138106	C	T	0.1292	0.014646	1.13e-18	0.08207	35375	0.00219501	77.8148
ECI2	rs2262432	A	C	0.0772	0.009438	2.837e-16	0.24237	35374	0.00188786	66.9037
ECI2	rs2296260	C	A	-0.0521	0.008393	5.391e-10	0.364	35380	0.00108795	38.5315
ECI2	rs4130861	C	G	-0.191	0.013182	1.42e-47	0.10076	35375	0.00589981	209.932
ECI2	rs4959910	A	G	0.069	0.009818	2.1e-12	0.21375	35372	0.0013944	49.3887
ECI2	rs62394176	T	C	0.1723	0.013175	4.389e-39	0.10251	35378	0.00481107	171.019
ECI2	rs6597029	C	T	-0.2368	0.011617	2.293e-92	0.13412	35378	0.0116084	415.481
ECI2	rs6597052	G	A	0.0505	0.008617	4.617e-09	0.31734	35375	0.000969957	34.3436
ECI2	rs6916982	C	T	0.1714	0.016478	2.43e-25	0.06271	35378	0.00304897	108.19
ECI2	rs6923069	G	A	0.0929	0.00817	5.857e-30	0.4253	35376	0.00364162	129.289
ECI2	rs72845845	A	T	0.1264	0.015851	1.534e-15	0.07023	35374	0.00179439	63.5852
ECI2	rs73353385	A	C	-0.2377	0.012525	2.615e-80	0.11475	35377	0.0100782	360.146
ECI2	rs7341228	A	G	-0.2575	0.010805	1.555e-125	0.16499	35377	0.0158004	567.911
ECI2	rs75305369	G	A	-0.269	0.023128	2.877e-31	0.0318	35377	0.00380934	135.271
ECI2	rs75418047	T	A	-0.0799	0.014642	4.845e-08	0.08246	35377	0.00084102	29.7761
ECI2	rs75591658	T	C	-0.1828	0.025388	6.004e-13	0.02548	35377	0.00146332	51.8407
ECI2	rs76394573	C	T	-0.2028	0.031258	8.697e-11	0.0174	35375	0.0011885	42.091
ECI2	rs77401727	T	G	-0.198	0.031399	2.864e-10	0.01628	35379	0.0011227	39.7625
ECI2	rs77482745	G	A	-0.1925	0.02652	3.912e-13	0.02242	35375	0.00148721	52.6854
ECI2	rs7756630	G	T	-0.3161	0.007007	1e-200	0.34908	35378	0.0543953	2034.98
ECI2	rs79955213	A	G	0.1409	0.02082	1.309e-11	0.03833	35378	0.0012929	45.7969
ECI2	rs80329755	A	G	-0.3542	0.03079	1.261e-30	0.01645	35377	0.00372679	132.328
ECI2	rs80330661	G	C	0.0708	0.010809	5.758e-11	0.16433	35375	0.00121136	42.9013
ECI2	rs9405647	T	C	0.0454	0.008074	1.88e-08	0.4633	35378	0.000892921	31.6162
ECI2	rs9502099	AAG	AAA	0.0617	0.008603	7.39e-13	0.33702	35374	0.00145196	51.4335
ECI2	rs9503847	T	C	0.1141	0.019164	2.617e-09	0.04686	35374	0.00100111	35.4466
ECI2	rs9503907	G	T	0.1593	0.013312	5.307e-33	0.10403	35378	0.00403141	143.193
ALDH3B1	rs10791956	A	G	-0.0588	0.007954	1.445e-13	0.44849	35355	0.00154334	54.6461
ALDH3B1	rs387236	G	C	-0.0457	0.008107	1.727e-08	0.41555	35350	0.000898116	31.7751
ALDH3B1	rs475325	T	C	0.135	0.009383	6.226e-47	0.23363	35354	0.00582117	206.995
CCS	rs10791902	T	C	0.046	0.008004	9.069e-09	0.48594	35353	0.000933404	33.0276
CCS	rs11537930	T	C	-0.0768	0.013347	8.718e-09	0.10102	35354	0.000935643	33.1078
CCS	rs146249445	A	G	-0.0797	0.01419	1.948e-08	0.08523	35354	0.000891509	31.5448
CCS	rs498045	G	A	0.1131	0.008053	8.306e-45	0.44838	35354	0.00554824	197.236
CCS	rs531784	C	T	0.0563	0.009772	8.358e-09	0.20867	35353	0.000938028	33.1914
RSPO3	rs11154346	G	A	-0.0528	0.008907	3.065e-09	0.26859	35350	0.00099308	35.1383
RSPO3	rs11154416	A	G	-0.0708	0.00929	2.513e-14	0.23979	35346	0.00164052	58.0778
RSPO3	rs112828142	C	T	-0.1402	0.023592	2.802e-09	0.03124	35349	0.000998058	35.3136
RSPO3	rs113622822	T	G	0.2041	0.018984	5.861e-27	0.04622	35349	0.00325923	115.581
RSPO3	rs140418154	CA	C	-0.1673	0.013317	3.39e-36	0.09957	35347	0.0044452	157.817
RSPO3	rs140936961	C	T	0.2266	0.038165	2.896e-09	0.01056	35347	0.000996331	35.2505
RSPO3	rs141783576	C	G	0.2365	0.0129	4.502e-75	0.10452	35347	0.00941933	336.092
RSPO3	rs143877243	ATT	A	-0.0743	0.011415	7.567e-11	0.14239	35350	0.00119706	42.3644
RSPO3	rs183532312	T	C	-0.168	0.02578	7.193e-11	0.02394	35349	0.00119993	42.4647
RSPO3	rs1930954	A	T	-0.0846	0.013316	2.111e-10	0.0991	35348	0.0011406	40.3616
RSPO3	rs2503115	G	T	0.1337	0.017069	4.775e-15	0.05971	35346	0.00173282	61.3511
RSPO3	rs4897193	A	G	-0.0973	0.007979	3.346e-34	0.46816	35348	0.00418929	148.698
RSPO3	rs514064	A	C	-0.0973	0.017196	1.529e-08	0.0567	35346	0.000904977	32.0145
RSPO3	rs74762765	C	T	-0.1963	0.025101	5.263e-15	0.02599	35347	0.00172725	61.1553
RSPO3	rs75339641	C	A	-0.1463	0.019386	4.471e-14	0.04556	35347	0.00160865	56.9492
RSPO3	rs77119312	TAAAAGAAAAAAAAAA	TAAAAAAAAAAAAAAA	0.0846	0.014796	1.079e-08	0.07768	35335	0.000924369	32.6909
RSPO3	rs7746179	CTTAAA	CTTAAG	-0.0822	0.01298	2.404e-10	0.10334	35350	0.00113322	40.1023
RSPO3	rs77495054	C	T	0.1494	0.023317	1.481e-10	0.02898	35347	0.00116011	41.0517
RSPO3	rs7761726	C	T	-0.0639	0.010602	1.67e-09	0.17096	35347	0.00102666	36.3247
RSPO3	rs79618076	G	A	0.0941	0.014492	8.394e-11	0.08151	35347	0.00119139	42.1597
RSPO3	rs9285458	A	G	0.2125	0.007975	1.971e-156	0.44365	35346	0.0196915	709.957
LYPD3	rs11666797	A	C	-0.1251	0.010475	7.073e-33	0.18416	35354	0.00401809	142.621
LYPD3	rs2682556	GCGGGGGTTG	GCGGGGGTCG	0.1209	0.009811	6.774e-35	0.22038	35363	0.00427579	151.845
LYPD3	rs35681564	A	G	0.1413	0.010056	7.508e-45	0.20779	35350	0.00555425	197.428
LYPD3	rs8113762	G	A	-0.059	0.008731	1.405e-11	0.32356	35363	0.00128963	45.6616
NEGR1	rs1026566	A	G	0.1322	0.008358	2.365e-56	0.46037	35343	0.00702896	250.169
NEGR1	rs112767776	T	C	-0.1035	0.015985	9.488e-11	0.07536	35344	0.00118475	41.9209
NEGR1	rs114846087	A	T	0.1185	0.021514	3.627e-08	0.04048	35344	0.000857642	30.3368
NEGR1	rs12028229	T	G	-0.0657	0.009739	1.516e-11	0.24014	35342	0.00128603	45.5069
NEGR1	rs1775368	T	A	-0.0679	0.010038	1.342e-11	0.2276	35342	0.00129298	45.7531
NEGR1	rs2554414	G	A	0.0528	0.009486	2.607e-08	0.26494	35341	0.000875875	30.9797
NEGR1	rs2630402	C	A	-0.1077	0.008871	6.457e-34	0.33696	35344	0.00415301	147.388
NEGR1	rs4348675	C	T	-0.1132	0.012019	4.585e-21	0.1441	35341	0.00250374	88.7016
NEGR1	rs479934	T	C	0.0683	0.010631	1.321e-10	0.18939	35340	0.00116659	41.2732
NEGR1	rs782202	T	G	-0.0648	0.00954	1.1e-11	0.26252	35342	0.00130375	46.1348
NEGR1	rs78738825	T	C	-0.1277	0.021471	2.723e-09	0.03863	35338	0.001	35.3714
FSTL1	rs111921869	G	C	-0.1776	0.01871	2.263e-21	0.05058	35353	0.00254218	90.0977
FSTL1	rs1147707	T	C	-0.1507	0.008488	1.602e-70	0.37455	35352	0.00883785	315.204
FSTL1	rs1147733	T	C	0.087	0.008941	2.241e-22	0.30012	35353	0.00267103	94.6764
FSTL1	rs1259292	T	C	-0.1	0.009322	7.566e-27	0.26162	35353	0.00324447	115.069
FSTL1	rs1259491	A	C	0.0761	0.010422	2.836e-13	0.19225	35353	0.00150587	53.3142
FSTL1	rs1733302	C	T	-0.0807	0.014748	4.449e-08	0.08537	35352	0.000846251	29.9403
FSTL1	rs4676808	C	T	-0.0641	0.010387	6.769e-10	0.19527	35348	0.00107623	38.0813
FSTL1	rs60112606	CAA	C	-0.0933	0.015259	9.694e-10	0.07898	35353	0.00105639	37.3841
FSTL1	rs78226443	T	C	0.1399	0.019154	2.793e-13	0.04908	35352	0.00150677	53.3448
FSTL1	rs79184149	A	G	0.1246	0.019421	1.402e-10	0.04679	35353	0.00116295	41.1593
CD177	rs10411716	C	T	0.2708	0.025251	7.817e-27	0.03235	35356	0.0032424	115.005
CD177	rs10425455	G	C	0.2196	0.009005	2.447e-131	0.383	35358	0.0165412	594.665
CD177	rs10425734	ACAGGCCACAAG	ACAGTCCACAAG	0.3099	0.008629	1e-200	0.47812	35355	0.0351973	1289.73
CD177	rs10454103	T	C	0.0761	0.012884	3.498e-09	0.13588	35353	0.000985855	34.8854
CD177	rs10659642	CTT	C	0.2267	0.009572	5.2e-124	0.29534	35357	0.0156166	560.884
CD177	rs111712264	G	T	-0.2968	0.017853	4.62e-62	0.06578	35351	0.0077575	276.364
CD177	rs112057634	T	G	0.2865	0.035128	3.466e-16	0.01534	35358	0.00187775	66.5147
CD177	rs112278379	G	T	-0.6317	0.035016	9.382e-73	0.0158	35353	0.00912184	325.435
CD177	rs112430616	A	G	-0.6123	0.02578	1.075e-124	0.02836	35359	0.0157032	564.077
CD177	rs112454260	A	G	0.2779	0.015381	5.721e-73	0.088	35355	0.00914883	326.425
CD177	rs11665703	C	T	0.3867	0.024786	7.129e-55	0.03287	35358	0.00683704	243.395
CD177	rs11666650	C	T	-0.135	0.008965	3.024e-51	0.38702	35363	0.0063715	226.747
CD177	rs11668974	A	G	-0.239	0.020923	3.22e-30	0.04573	35361	0.00367641	130.474
CD177	rs11669818	A	C	0.2438	0.030173	6.47e-16	0.0221	35356	0.00184317	65.2839
CD177	rs11671567	A	G	0.4335	0.006195	1e-200	0.19818	35350	0.121665	4896.33
CD177	rs116878540	C	T	0.2451	0.03606	1.068e-11	0.01501	35357	0.00130495	46.1967
CD177	rs116944723	C	T	0.1295	0.017131	4.047e-14	0.06954	35355	0.0016137	57.1412
CD177	rs117008693	T	C	-0.3586	0.032734	6.293e-28	0.01887	35360	0.00338251	120.005
CD177	rs117089675	T	C	0.1623	0.018808	6.183e-18	0.0567	35359	0.00210154	74.4607
CD177	rs117225404	G	T	-0.1435	0.022048	7.586e-11	0.04192	35361	0.00119652	42.3585
CD177	rs117408188	T	G	-0.1292	0.021807	3.127e-09	0.04341	35353	0.000991918	35.1001
CD177	rs117410802	A	G	-0.2602	0.029721	2.048e-18	0.02259	35358	0.00216302	76.6414
CD177	rs117473000	A	G	-0.1939	0.033425	6.588e-09	0.0178	35358	0.00095085	33.6502
CD177	rs117481364	T	C	-0.1493	0.026619	2.037e-08	0.02842	35363	0.000888794	31.4566
CD177	rs117809901	ATA	ATC	0.602	0.027744	2.142e-104	0.02469	35356	0.0131415	470.793
CD177	rs117905210	A	G	-0.1417	0.017162	1.499e-16	0.06905	35359	0.00192428	68.1678
CD177	rs118149610	G	A	-0.1646	0.024926	4.011e-11	0.03136	35361	0.00123167	43.6044
CD177	rs118177040	T	C	-0.6229	0.036055	7.11e-67	0.0153	35351	0.00837245	298.457
CD177	rs1207132	TGGGGAGG	GGGGGAGG	-0.0994	0.010117	8.768e-23	0.24702	35356	0.00272284	96.5261
CD177	rs12610476	T	C	-0.1912	0.009891	2.918e-83	0.26767	35359	0.0104575	373.655
CD177	rs12972416	G	A	0.1328	0.010454	5.688e-37	0.22759	35358	0.00454324	161.364
CD177	rs12981004	A	G	0.0496	0.008834	1.968e-08	0.4479	35351	0.000890963	31.5227
CD177	rs138250730	T	C	0.1767	0.024719	8.78e-13	0.03277	35361	0.00144298	51.096
CD177	rs138398585	T	C	0.1641	0.027187	1.579e-09	0.02598	35358	0.00102934	36.4309
CD177	rs138605473	T	G	1.1741	0.017378	1e-200	0.02091	35357	0.114341	4564.42
CD177	rs139085717	CTTTTTTTGTTTTTCTTCT	CTTTTTTTTTTTTTCTTCT	-0.5429	0.03433	2.493e-56	0.0159	35359	0.00702314	250.073
CD177	rs139280117	C	A	-0.2457	0.023572	1.94e-25	0.03791	35361	0.0030631	108.641
CD177	rs139745492	C	A	0.2708	0.032822	1.576e-16	0.01808	35357	0.00192157	68.0679
CD177	rs140512098	G	C	0.1965	0.027166	4.718e-13	0.02519	35353	0.00147776	52.3178
CD177	rs140627212	T	C	-0.3878	0.042798	1.29e-19	0.01006	35364	0.00231633	82.1002
CD177	rs140776740	T	G	0.6128	0.024689	5.387e-136	0.03193	35355	0.0171268	616.036
CD177	rs141251757	T	C	-0.1848	0.015672	4.318e-32	0.08531	35357	0.00391719	139.037
CD177	rs141605371	G	T	-0.5335	0.034903	9.583e-53	0.01612	35361	0.00656385	233.625
CD177	rs141659491	T	C	0.4962	0.030719	1.081e-58	0.02132	35356	0.0073256	260.9
CD177	rs141810038	T	A	-0.3532	0.028393	1.593e-35	0.02481	35358	0.00435747	154.737
CD177	rs142046892	T	G	0.2406	0.042473	1.472e-08	0.01065	35356	0.000906793	32.0879
CD177	rs142144960	T	C	-0.7713	0.021768	1e-200	0.03959	35351	0.0342966	1255.41
CD177	rs142399727	T	C	0.262	0.035712	2.192e-13	0.01505	35353	0.00152015	53.8207
CD177	rs142698166	A	G	0.3751	0.023563	4.661e-57	0.03719	35353	0.00711713	253.401
CD177	rs142777208	A	T	0.3261	0.031	7.047e-26	0.02103	35356	0.00312002	110.651
CD177	rs143091816	C	A	0.664	0.034373	3.836e-83	0.01574	35351	0.0104457	373.144
CD177	rs143661197	A	G	0.3198	0.042393	4.57e-14	0.01019	35360	0.00160679	56.9042
CD177	rs144000199	G	A	-0.2944	0.023055	2.426e-37	0.0372	35356	0.00459075	163.05
CD177	rs144351616	A	G	0.4551	0.030837	2.726e-49	0.02091	35361	0.00612178	217.793
CD177	rs144764562	A	G	0.9174	0.030821	1.096e-194	0.02049	35356	0.0244462	885.93
CD177	rs145130411	TG	TT	0.2323	0.013279	1.597e-68	0.12514	35360	0.00858051	306.015
CD177	rs145164046	C	T	0.3274	0.022578	1.193e-47	0.04261	35348	0.00591352	210.263
CD177	rs146117820	T	C	-0.291	0.027313	1.668e-26	0.02656	35355	0.0032004	113.507
CD177	rs146134374	A	G	-0.2331	0.038796	1.875e-09	0.01275	35356	0.00102001	36.0982
CD177	rs146861808	T	G	0.5139	0.032584	4.894e-56	0.01873	35356	0.00698619	248.728
CD177	rs147910249	T	C	0.7028	0.029007	1.111e-129	0.02386	35352	0.016334	586.994
CD177	rs148165098	C	G	0.614	0.021076	1.382e-186	0.04461	35356	0.023442	848.664
CD177	rs148442727	A	G	-0.3359	0.031528	1.669e-26	0.01952	35362	0.00319962	113.502
CD177	rs148568752	A	C	0.23	0.016116	3.283e-46	0.07973	35356	0.00572774	203.665
CD177	rs149040093	A	G	-0.3745	0.042744	1.927e-18	0.01067	35361	0.00216614	76.7589
CD177	rs149983570	C	G	-0.1706	0.026047	5.763e-11	0.02786	35358	0.00121179	42.8961
CD177	rs149990351	G	A	0.4736	0.041364	2.364e-30	0.01187	35362	0.00369347	131.085
CD177	rs150225394	C	T	0.3588	0.03552	5.444e-24	0.01499	35356	0.00287769	102.032
CD177	rs150484653	A	G	0.5622	0.026089	5.419e-103	0.02941	35351	0.0129657	464.347
CD177	rs150915794	T	G	-0.2817	0.031159	1.555e-19	0.0207	35356	0.00230643	81.7301
CD177	rs151262344	A	G	0.3123	0.01068	5.616e-188	0.21096	35349	0.0236181	855.021
CD177	rs2001169	C	T	-0.3961	0.021581	3.041e-75	0.04204	35356	0.00943811	336.854
CD177	rs2159027	C	A	0.2116	0.013675	5.242e-54	0.11399	35356	0.0067264	239.415
CD177	rs2283631	C	T	-0.1971	0.015373	1.253e-37	0.08848	35358	0.00462758	164.373
CD177	rs2599474	TCTACAAAAAAAAAAATTTTTTTT	TCTACAAAAAAAAAATTTTTTTTT	0.1132	0.014068	8.491e-16	0.10606	35353	0.00182813	64.7446
CD177	rs2722743	G	A	-0.0917	0.008778	1.524e-25	0.49664	35360	0.00307678	109.125
CD177	rs28374252	G	A	0.2111	0.019354	1.065e-27	0.05541	35358	0.00335342	118.963
CD177	rs28452845	C	A	0.364	0.016112	5.174e-113	0.07831	35358	0.0142296	510.363
CD177	rs28615573	C	A	0.9461	0.025539	1e-200	0.02964	35355	0.037366	1372.28
CD177	rs34051422	C	G	0.3693	0.039039	3.084e-21	0.01259	35358	0.0025245	89.4822
CD177	rs34137659	A	G	-0.3499	0.011375	1e-200	0.17684	35359	0.0260625	946.151
CD177	rs34164544	T	G	0.2509	0.01289	2.17e-84	0.13405	35359	0.0106015	378.853
CD177	rs34297260	A	T	-0.516	0.023376	5.6e-108	0.03599	35357	0.0135938	487.23
CD177	rs344780	C	T	-0.097	0.010144	1.15e-21	0.24728	35357	0.00257945	91.4325
CD177	rs346043	T	C	0.1366	0.009346	2.224e-48	0.33038	35358	0.00600546	213.612
CD177	rs346535	T	C	0.0787	0.010287	2e-14	0.23509	35358	0.00165259	58.5258
CD177	rs35135153	A	C	-0.268	0.01599	4.76e-63	0.08155	35351	0.00788376	280.898
CD177	rs35323093	G	C	-0.2011	0.018349	5.969e-28	0.05975	35359	0.00338553	120.109
CD177	rs3745997	T	G	0.4825	0.023032	1.917e-97	0.03624	35356	0.0122606	438.841
CD177	rs3746322	C	T	0.1357	0.01662	3.216e-16	0.0739	35361	0.00188172	66.6612
CD177	rs384596	CGC	TGC	-0.0948	0.008799	4.562e-27	0.49178	35360	0.00327201	116.071
CD177	rs397133	G	A	-0.2176	0.024407	4.858e-19	0.03264	35361	0.00224279	79.4812
CD177	rs41517547	C	T	-0.1214	0.012895	4.765e-21	0.13414	35360	0.00250032	88.6278
CD177	rs4251840	C	T	0.0985	0.009445	1.836e-25	0.31454	35357	0.00306662	108.754
CD177	rs4251842	C	A	0.2304	0.017598	3.624e-39	0.06688	35358	0.00482448	171.401
CD177	rs4251859	A	G	0.1107	0.016433	1.622e-11	0.07797	35358	0.00128179	45.3771
CD177	rs435957	A	G	0.2121	0.035466	2.227e-09	0.01714	35363	0.00101034	35.7629
CD177	rs4429390	G	T	-0.1431	0.012451	1.432e-30	0.1462	35362	0.00372147	132.083
CD177	rs450880	T	G	0.1755	0.012007	2.188e-48	0.15826	35363	0.0060051	213.629
CD177	rs45444992	A	G	0.3465	0.033276	2.166e-25	0.0174	35359	0.00305713	108.423
CD177	rs45597032	A	T	0.174	0.016142	4.323e-27	0.08102	35359	0.00327536	116.187
CD177	rs4803624	C	A	0.2001	0.009058	3.84e-108	0.35904	35354	0.0136156	487.983
CD177	rs55755447	A	G	0.0827	0.012688	7.129e-11	0.13832	35363	0.00119993	42.4815
CD177	rs55840997	A	G	-0.34	0.031481	3.435e-27	0.01905	35363	0.00328762	116.637
CD177	rs55903023	G	C	-0.2031	0.018209	6.871e-29	0.0612	35357	0.00350628	124.401
CD177	rs56299438	A	C	0.2361	0.018563	4.66e-37	0.0605	35360	0.00455408	161.76
CD177	rs56365932	A	C	0.4086	0.039196	1.914e-25	0.01295	35357	0.00306411	108.665
CD177	rs60175550	C	T	0.1548	0.022911	1.414e-11	0.03856	35363	0.00128927	45.6488
CD177	rs62113716	A	G	-0.6039	0.008777	1e-200	0.08467	35351	0.118101	4733.84
CD177	rs62115478	G	A	0.3224	0.020524	1.322e-55	0.04877	35362	0.00692962	246.741
CD177	rs62115722	C	T	0.2018	0.018142	9.627e-29	0.06213	35353	0.00348761	123.722
CD177	rs71350666	T	C	0.3555	0.013248	1.292e-158	0.12529	35348	0.0199644	720.036
CD177	rs7245651	G	C	0.1488	0.009439	5.527e-56	0.30192	35362	0.00697872	248.502
CD177	rs7250735	GAGGTACGGTGCGC	CAGGTACGGTGCGC	0.9639	0.013921	1e-200	0.0317	35355	0.119411	4794.01
CD177	rs7256255	C	T	-0.2993	0.013675	3.446e-106	0.11519	35360	0.013366	478.999
CD177	rs7260187	T	C	-0.2272	0.020094	1.214e-29	0.0503	35362	0.0036023	127.838
CD177	rs73039701	T	A	0.2133	0.025903	1.802e-16	0.02982	35361	0.00191393	67.8043
CD177	rs73041555	G	A	0.2285	0.012941	9.036e-70	0.13027	35353	0.00874173	311.754
CD177	rs73043696	TCTCTCTCTCTTTTTTG	TCTCTCTCTCTTTTTTT	-0.2317	0.039075	3.037e-09	0.01266	35363	0.000993284	35.1584
CD177	rs73553925	T	C	-0.6953	0.030409	1.032e-115	0.02103	35356	0.0145714	522.776
CD177	rs74260417	A	G	0.238	0.033902	2.214e-12	0.01661	35354	0.00139207	49.2809
CD177	rs74260430	T	C	0.4783	0.039814	3.021e-33	0.01245	35358	0.00406511	144.313
CD177	rs74487631	A	G	0.3805	0.026301	1.949e-47	0.02933	35358	0.00588456	209.286
CD177	rs74557322	C	T	-0.3615	0.029083	1.794e-35	0.02435	35349	0.00435178	154.495
CD177	rs76187118	T	C	0.3293	0.027745	1.718e-32	0.02569	35361	0.00396792	140.861
CD177	rs767540	T	C	-0.2198	0.012163	5.328e-73	0.15313	35363	0.00915024	326.55
CD177	rs77226715	A	G	0.4481	0.02787	3.621e-58	0.02517	35358	0.00725813	258.495
CD177	rs77595924	T	C	0.1418	0.017518	5.739e-16	0.067	35363	0.0018494	65.5177
CD177	rs78112898	A	G	-0.3984	0.036373	6.416e-28	0.01509	35362	0.00338121	119.965
CD177	rs78189176	A	G	0.9647	0.031566	1e-200	0.02088	35353	0.0257392	933.944
CD177	rs78530667	C	T	-0.6299	0.007683	1e-200	0.11423	35355	0.159749	6721.36
CD177	rs78667178	A	C	0.5031	0.042649	4.084e-32	0.01013	35360	0.00391988	139.145
CD177	rs78669473	C	A	0.2645	0.023343	9.237e-30	0.03717	35358	0.00361806	128.385
CD177	rs78834848	C	G	0.5474	0.027518	4.746e-88	0.02974	35353	0.0110692	395.687
CD177	rs79026866	A	G	-0.0668	0.011614	8.847e-09	0.17073	35356	0.000934803	33.0799
CD177	rs79696001	A	G	-0.7292	0.010089	1e-200	0.06298	35351	0.128748	5223.63
CD177	rs79978807	A	G	0.5191	0.035819	1.355e-47	0.01522	35353	0.00590577	210.015
CD177	rs80196961	C	T	0.1817	0.020838	2.795e-18	0.04582	35362	0.0021455	76.0279
CD177	rs8101200	A	G	0.2625	0.015062	5.039e-68	0.09261	35363	0.00851589	303.717
CD177	rs8111541	AAGTGTTGAC	AAGTGTTGGC	0.2414	0.03144	1.613e-14	0.02046	35356	0.00166465	58.9501
CD177	rs8113647	T	C	0.1182	0.009432	5.023e-36	0.30652	35355	0.00442234	157.037
FLRT2	rs10135948	CAAAAA	CAAACA	-0.1271	0.008394	8.579e-52	0.38732	35346	0.00644473	229.26
FLRT2	rs10149105	T	C	-0.1111	0.009405	3.365e-32	0.25335	35348	0.00393219	139.536
FLRT2	rs116873089	T	C	-0.2424	0.024764	1.264e-22	0.02733	35349	0.00270316	95.8074
FLRT2	rs117385346	A	G	0.1421	0.019593	4.092e-13	0.04538	35343	0.00148606	52.5971
FLRT2	rs117715901	A	G	-0.245	0.01576	1.703e-54	0.07385	35346	0.00679079	241.655
FLRT2	rs11874511	G	T	0.1456	0.020762	2.335e-12	0.04079	35349	0.00138932	49.1767
FLRT2	rs12432038	C	T	0.1242	0.015833	4.346e-15	0.07324	35349	0.00173774	61.5307
FLRT2	rs12590369	G	C	0.0659	0.009285	1.272e-12	0.26458	35349	0.00142302	50.3712
FLRT2	rs12890932	T	G	0.0739	0.010198	4.278e-13	0.20274	35347	0.00148341	52.5091
FLRT2	rs1289429	G	A	-0.1261	0.00826	1.282e-52	0.42217	35345	0.0065507	233.048
FLRT2	rs140042233	A	G	-0.1504	0.022055	9.148e-12	0.03679	35342	0.00131407	46.5004
FLRT2	rs143337234	A	T	-0.1714	0.027683	5.96e-10	0.02245	35344	0.00108345	38.3328
FLRT2	rs145261136	C	T	0.1939	0.032687	2.991e-09	0.01511	35349	0.00099448	35.1869
FLRT2	rs146670798	T	C	0.1442	0.019907	4.364e-13	0.04355	35346	0.00148229	52.468
FLRT2	rs148950661	T	C	-0.1824	0.020571	7.526e-19	0.0413	35343	0.00221958	78.6166
FLRT2	rs150137691	G	A	-0.2111	0.034852	1.386e-09	0.01384	35349	0.0010368	36.6857
FLRT2	rs17094413	C	G	0.0849	0.009496	3.864e-19	0.24356	35348	0.00225625	79.9299
FLRT2	rs17659228	A	G	-0.0669	0.010922	9.051e-10	0.17091	35348	0.00106028	37.5166
FLRT2	rs182071191	G	A	-0.2171	0.032858	3.916e-11	0.01626	35348	0.00123349	43.6529
FLRT2	rs2747001	G	T	0.1683	0.01128	2.423e-50	0.15836	35346	0.00625869	222.6
FLRT2	rs35018083	A	G	-0.1378	0.022996	2.067e-09	0.03365	35346	0.00101488	35.9062
FLRT2	rs36101989	T	G	-0.2728	0.009053	1.787e-199	0.28128	35348	0.0250451	907.986
FLRT2	rs58123384	A	T	0.0945	0.008234	1.735e-30	0.45474	35346	0.00371267	131.71
FLRT2	rs58286053	A	G	0.1384	0.022612	9.324e-10	0.03438	35343	0.00105884	37.4602
FLRT2	rs61339369	A	G	-0.0732	0.012622	6.662e-09	0.12044	35344	0.000950686	33.6311
FLRT2	rs61980083	TTT	GTT	-0.1768	0.024777	9.625e-13	0.02838	35349	0.00143835	50.9146
FLRT2	rs61980088	T	A	0.1297	0.010263	1.314e-36	0.19727	35349	0.00449776	159.701
FLRT2	rs61988490	T	A	-0.09	0.01481	1.226e-09	0.08374	35339	0.00104392	36.9275
FLRT2	rs61992646	C	T	-0.0454	0.008198	3.055e-08	0.44292	35343	0.000866993	30.667
FLRT2	rs6574807	G	C	0.1204	0.00828	6.688e-48	0.44774	35349	0.005946	211.431
FLRT2	rs67558286	C	G	-0.0639	0.009473	1.527e-11	0.24445	35346	0.00128566	45.499
FLRT2	rs71418985	C	T	-0.113	0.014024	7.778e-16	0.0942	35349	0.00183332	64.9215
FLRT2	rs7146419	A	C	0.0575	0.008603	2.335e-11	0.34789	35344	0.00126233	44.6695
FLRT2	rs72679968	T	C	-0.2186	0.030704	1.083e-12	0.01797	35348	0.00143193	50.6857
FLRT2	rs72689113	A	C	-0.0931	0.008694	9.342e-27	0.33389	35348	0.00323362	114.666
FLRT2	rs72692318	A	T	-0.0768	0.011367	1.416e-11	0.15221	35348	0.00128975	45.6464
FLRT2	rs74068457	G	A	0.0932	0.012514	9.48e-14	0.12521	35349	0.00156668	55.4645
FLRT2	rs74542445	ACAGAGAGAGAGAGAGAAAAAAAAAAAAT	ACAGAGAGAGAGAGAGAGAAAAAAAAAAT	0.1119	0.018759	2.443e-09	0.05005	35348	0.00100563	35.5808
FLRT2	rs75437599	A	G	0.1151	0.014635	3.7e-15	0.08743	35346	0.00174689	61.8501
FLRT2	rs76275022	C	T	0.158	0.020728	2.489e-14	0.04001	35346	0.00164114	58.0998
FLRT2	rs76534798	T	C	-0.1903	0.026656	9.402e-13	0.02368	35347	0.00143982	50.9639
FLRT2	rs78580752	G	A	-0.1365	0.024075	1.43e-08	0.0297	35346	0.000908652	32.1446
FLRT2	rs78635043	T	C	-0.2141	0.03542	1.497e-09	0.01292	35349	0.00103255	36.5352
FLRT2	rs8015432	T	C	-0.0584	0.010291	1.387e-08	0.19752	35348	0.000910228	32.2022
FLRT2	rs8017275	A	G	0.0667	0.008374	1.654e-15	0.40159	35343	0.00179186	63.4397
FLRT2	rs8017468	A	G	-0.0695	0.009291	7.412e-14	0.26924	35348	0.00158049	55.9526
FLRT2	rs985620	G	A	-0.0967	0.017178	1.81e-08	0.05996	35346	0.000895732	31.6871
ISLR2	rs1109438	G	T	-0.1143	0.015436	1.315e-13	0.07689	35351	0.00154863	54.8275
ISLR2	rs113149566	C	T	-0.1441	0.026292	4.236e-08	0.02472	35351	0.000849005	30.037
ISLR2	rs11630438	C	A	-0.0953	0.010878	1.945e-18	0.17795	35350	0.00216649	76.7473
ISLR2	rs117378025	A	G	-0.1138	0.017494	7.773e-11	0.06006	35349	0.00119567	42.3138
ISLR2	rs117983053	C	A	-0.1566	0.026666	4.29e-09	0.02407	35350	0.000974664	34.486
ISLR2	rs12148395	A	G	0.1225	0.016794	2.999e-13	0.06537	35350	0.00150287	53.2034
ISLR2	rs12898770	G	A	-0.0676	0.010932	6.262e-10	0.17052	35350	0.00108053	38.2357
ISLR2	rs12905151	T	G	0.1334	0.020927	1.834e-10	0.04043	35351	0.00114815	40.6325
ISLR2	rs139036853	T	C	-0.1487	0.02078	8.308e-13	0.0403	35349	0.00144652	51.2043
ISLR2	rs140601704	G	A	0.1559	0.027695	1.811e-08	0.02228	35349	0.000895619	31.6858
ISLR2	rs150193285	T	C	-0.1373	0.023141	2.969e-09	0.0346	35352	0.000994788	35.2008
ISLR2	rs17326524	C	T	-0.135	0.016926	1.513e-15	0.06496	35350	0.00179634	63.6113
ISLR2	rs1904335	C	A	0.0543	0.008336	7.312e-11	0.42722	35349	0.00119891	42.4287
ISLR2	rs2075590	G	T	-0.0612	0.010958	2.336e-08	0.16985	35349	0.000881617	31.19
ISLR2	rs2734633	C	A	-0.1034	0.014761	2.475e-12	0.08598	35350	0.00138617	49.0665
ISLR2	rs28408164	A	G	-0.0502	0.00855	4.329e-09	0.35732	35350	0.000974232	34.4707
ISLR2	rs28548701	C	T	-0.1079	0.009993	3.537e-27	0.21847	35350	0.00328724	116.581
ISLR2	rs351222	C	G	-0.1049	0.008721	2.526e-33	0.32694	35351	0.00407608	144.675
ISLR2	rs3826041	C	A	0.0787	0.012427	2.405e-10	0.12431	35349	0.00113331	40.1044
ISLR2	rs4886802	T	C	0.0684	0.008609	1.934e-15	0.3675	35349	0.0017826	63.1222
ISLR2	rs4887134	T	A	-0.1646	0.008508	2.153e-83	0.36528	35351	0.0104768	374.266
ISLR2	rs58712424	G	A	0.1725	0.020365	2.449e-17	0.04397	35351	0.00202548	71.7439
ISLR2	rs7163410	C	A	-0.1979	0.035356	2.176e-08	0.01411	35349	0.00088553	31.3286
ISLR2	rs7173049	G	A	-0.0621	0.01037	2.117e-09	0.19672	35349	0.00101346	35.8592
ISLR2	rs72741424	G	A	0.1262	0.019621	1.261e-10	0.04387	35349	0.00116894	41.3668
ISLR2	rs76267074	T	C	-0.209	0.036993	1.607e-08	0.01201	35350	0.000902136	31.9175
ISLR2	rs77056729	G	A	-0.1734	0.017249	8.937e-24	0.06093	35350	0.00285063	101.052
ISLR2	rs78246124	C	A	-0.1702	0.02954	8.331e-09	0.02095	35349	0.000938239	33.1951
ISLR2	rs78826069	A	G	-0.1358	0.017206	2.955e-15	0.06212	35349	0.00175913	62.2895
ISLR2	rs79942262	GTT	ATT	0.0872	0.014344	1.207e-09	0.08815	35349	0.00104439	36.9545
ISLR2	rs8027640	T	C	0.1888	0.02383	2.323e-15	0.03211	35351	0.00177249	62.767
ISLR2	rs8033129	A	C	-0.1401	0.010596	6.513e-40	0.18535	35349	0.00492122	174.811
ISLR2	rs874712	G	A	-0.142	0.013332	1.728e-26	0.10657	35351	0.00319884	113.439
ISLR2	rs901132	T	G	-0.0584	0.009598	1.167e-09	0.24796	35351	0.00104618	37.0203
ISLR2	rs923118	T	G	0.2143	0.009585	1.038e-110	0.23863	35350	0.0139435	499.845
PXDN	rs1054241	C	T	-0.0575	0.008472	1.144e-11	0.38542	35298	0.00130331	46.0616
PXDN	rs111613941	ATGTGTGTGTGTGTGTGTGTGTGTGTGTGTGTG	ATGTGTGTGTGTGTGTGTGTGTGTGTG	0.1056	0.012802	1.599e-16	0.11706	35293	0.00192419	68.0374
PXDN	rs115053009	C	G	-0.1947	0.025609	2.9e-14	0.02587	35298	0.00163488	57.7992
PXDN	rs115155770	CTCTGTGG	CTCTGCGG	-0.0934	0.016397	1.225e-08	0.06649	35292	0.000918522	32.4444
PXDN	rs13035669	A	G	-0.0643	0.010781	2.46e-09	0.17564	35299	0.00100671	35.5696
PXDN	rs1808467	A	C	0.1231	0.008178	3.341e-51	0.47545	35298	0.00637812	226.567
PXDN	rs193015196	C	T	0.1344	0.020297	3.548e-11	0.04315	35298	0.00124064	43.844
PXDN	rs4553849	A	C	-0.0718	0.01307	3.943e-08	0.11446	35298	0.000854233	30.1768
PXDN	rs56919961	T	C	0.0816	0.011856	5.879e-12	0.13876	35298	0.00134021	47.3674
PXDN	rs6709512	T	C	0.0709	0.009292	2.35e-14	0.2665	35298	0.00164668	58.217
PXDN	rs73178775	A	C	0.0961	0.017176	2.205e-08	0.06107	35298	0.000886069	31.3024
PXDN	rs73182757	G	A	0.1467	0.009093	1.468e-58	0.28172	35298	0.0073199	260.268
PXDN	rs77946397	T	C	-0.1441	0.024951	7.682e-09	0.0278	35299	0.000944016	33.3524
ARHGEF25	rs10437954	A	G	-0.1808	0.012343	1.394e-48	0.11558	35360	0.00603137	214.551
ARHGEF25	rs113707341	TTTTTTT	TTTTTT	0.0796	0.013895	1.012e-08	0.08834	35363	0.000927165	32.8159
ARHGEF25	rs11524050	A	G	0.0888	0.01431	5.452e-10	0.08342	35363	0.00108774	38.5054
ARHGEF25	rs12426201	ACATACATATATATGTATGCATACATGTATGTATGCATATATGTATGTATGCATAG	ACATACATATATATGTATGCATACATGTATGTATGCATACATGTATGTATGCATAG	-0.0526	0.00808	7.518e-11	0.39498	35360	0.00119706	42.3764
ARHGEF25	rs199884127	CG	C	0.148	0.024692	2.049e-09	0.02661	35361	0.00101495	35.9241
ARHGEF25	rs201782086	AA	A	0.1657	0.020536	7.098e-16	0.0378	35361	0.00183776	65.1012
ARHGEF25	rs2069507	G	A	0.1741	0.021077	1.454e-16	0.03499	35360	0.00192589	68.2269
ARHGEF25	rs2277323	A	G	-0.0704	0.008502	1.225e-16	0.3111	35360	0.00193531	68.5612
EIF1AD	rs12418781	T	G	0.0638	0.011486	2.782e-08	0.14142	35360	0.000871792	30.8517
EIF1AD	rs150934757	A	G	0.1123	0.020169	2.578e-08	0.04026	35356	0.000876087	31.0003
EIF1AD	rs4310623	A	G	0.0467	0.00837	2.414e-08	0.34039	35360	0.000879606	31.1285
EIF1AD	rs477280	A	C	0.0534	0.008867	1.72e-09	0.2822	35360	0.00102464	36.2664
EIF1AD	rs61890365	T	C	0.1973	0.029873	3.984e-11	0.01887	35357	0.00123221	43.6186
EIF1AD	rs6591199	TACTGCACC	CACTGCACC	0.0519	0.008798	3.656e-09	0.28985	35360	0.000983167	34.797
EIF1AD	rs72930984	T	C	0.6297	0.027239	3.089e-118	0.02122	35360	0.0148887	534.393
NADK	rs142834130	GAATGAATGAATGAATAAGTGTATCAGTGAG	GAATGAGTGAATGAATAAGTGTATCAGTGAG	0.1515	0.026368	9.157e-09	0.02315	35315	0.000933912	33.0101
NADK	rs28498068	G	T	-0.0627	0.009477	3.69e-11	0.23823	35318	0.00123783	43.7692
NADK	rs28561741	G	A	-0.0686	0.009189	8.278e-14	0.26005	35312	0.00157581	55.7298
NADK	rs4648629	A	C	-0.124	0.008111	9.158e-53	0.45042	35309	0.00657573	233.706
NADK	rs56044478	T	C	0.1082	0.014668	1.622e-13	0.08323	35322	0.00153815	54.4112
NADK	rs7455	A	G	0.1487	0.015302	2.535e-22	0.07525	35309	0.00266735	94.428
NADK	rs75816936	A	G	-0.2841	0.028319	1.103e-23	0.01998	35310	0.00284219	100.638
NADK	rs77787690	C	A	0.1043	0.01501	3.682e-12	0.07942	35320	0.00136519	48.2817
INHBB	rs111806057	G	C	-0.215	0.035213	1.024e-09	0.01443	35359	0.00105321	37.2775
INHBB	rs113129912	A	G	-0.2393	0.02467	3.013e-22	0.02947	35358	0.00265403	94.0855
INHBB	rs115353569	T	C	0.1689	0.021587	5.117e-15	0.03831	35359	0.00172832	61.2139
INHBB	rs115487840	A	G	-0.2291	0.032598	2.094e-12	0.01647	35356	0.00139508	49.3905
INHBB	rs115739359	G	C	0.1549	0.023089	1.962e-11	0.03507	35358	0.00127131	45.0058
INHBB	rs116205044	A	C	-0.0968	0.016157	2.083e-09	0.07133	35357	0.00101418	35.8926
INHBB	rs11685627	A	G	-0.0581	0.008367	3.811e-12	0.48169	35360	0.00136179	48.2157
INHBB	rs148119584	C	T	-0.176	0.020971	4.758e-17	0.04147	35358	0.00198809	70.4308
INHBB	rs17049444	G	A	0.0766	0.011964	1.526e-10	0.14244	35363	0.00115785	40.9902
INHBB	rs17050272	A	G	0.3414	0.006851	1e-200	0.41755	35358	0.0656226	2483.1
INHBB	rs17389324	T	C	0.0604	0.008469	9.896e-13	0.41681	35356	0.00143655	50.861
INHBB	rs2140779	T	C	-0.0599	0.010529	1.278e-08	0.19456	35358	0.000914522	32.3635
INHBB	rs2198222	G	C	-0.1384	0.008841	3.069e-55	0.32636	35356	0.00688346	245.044
INHBB	rs36103095	C	G	-0.168	0.009971	1.069e-63	0.22705	35359	0.00796468	283.868
INHBB	rs4849911	C	T	0.0797	0.012584	2.394e-10	0.12458	35356	0.00113324	40.1102
INHBB	rs55641520	T	C	-0.2591	0.028632	1.439e-19	0.02335	35356	0.00231081	81.8855
INHBB	rs62166962	G	C	0.1999	0.023097	4.936e-18	0.03418	35359	0.00211395	74.9014
INHBB	rs62167030	T	C	-0.1075	0.018033	2.502e-09	0.05738	35360	0.001004	35.535
INHBB	rs71396094	ACACACACA	ACACACA	0.0506	0.008941	1.522e-08	0.32717	35355	0.000905075	32.0261
INHBB	rs7572399	T	C	-0.1482	0.014514	1.778e-24	0.09239	35357	0.00294014	104.255
INHBB	rs76926392	T	C	0.2496	0.01429	2.587e-68	0.09391	35356	0.0085552	305.07
INHBB	rs77647252	C	G	0.105	0.014858	1.586e-12	0.08472	35360	0.00141037	49.9383
INHBB	rs78565816	G	A	0.0779	0.013363	5.553e-09	0.1086	35358	0.000960201	33.9815
INHBB	rs79590922	T	C	-0.099	0.013251	7.95e-14	0.11055	35359	0.00157612	55.8147
INHBB	rs9677933	T	C	-0.1643	0.01169	7.205e-45	0.15139	35358	0.0055557	197.525
IL12B	rs10043720	G	A	0.409	0.006907	1e-200	0.31512	35366	0.090204	3506.25
IL12B	rs10058305	T	C	0.0826	0.01188	3.581e-12	0.14456	35364	0.00136513	48.3396
IL12B	rs10060059	G	A	0.1396	0.00856	8.667e-60	0.37753	35364	0.00746462	265.949
IL12B	rs10075197	T	C	0.0526	0.008824	2.507e-09	0.33593	35369	0.00100365	35.5317
IL12B	rs10515793	C	T	-0.0639	0.008335	1.762e-14	0.4712	35366	0.00165914	58.7714
IL12B	rs10515795	C	T	-0.2533	0.017108	1.333e-49	0.06158	35365	0.00616048	219.203
IL12B	rs111546564	A	G	-0.5993	0.031977	2.27e-78	0.01704	35369	0.00983329	351.228
IL12B	rs112042454	C	T	-0.222	0.031835	3.094e-12	0.01754	35366	0.00137314	48.6264
IL12B	rs112381221	C	T	0.196	0.034222	1.02e-08	0.01546	35366	0.000926644	32.8002
IL12B	rs11272381	AGTTCTAC	A	0.0654	0.010978	2.565e-09	0.17527	35360	0.00100268	35.4882
IL12B	rs113505256	CACACACACACACACACACACAC	CACACACACACAC	-0.2024	0.012085	5.811e-63	0.13634	35363	0.0078695	280.481
IL12B	rs114799616	C	A	-0.1846	0.02357	4.807e-15	0.03165	35365	0.00173148	61.3366
IL12B	rs115056992	A	T	0.1438	0.020079	7.966e-13	0.04565	35365	0.00144821	51.2872
IL12B	rs115214473	G	C	-0.207	0.025704	8.056e-16	0.0264	35367	0.0018304	64.8507
IL12B	rs115342138	T	G	0.1511	0.020744	3.243e-13	0.04114	35368	0.0014979	53.0542
IL12B	rs115619145	T	C	-0.1432	0.025351	1.616e-08	0.0267	35363	0.000901478	31.9059
IL12B	rs115759645	T	C	-0.1862	0.0235	2.31e-15	0.03224	35367	0.00177197	62.7768
IL12B	rs116034218	A	G	0.1361	0.021688	3.488e-10	0.03782	35366	0.00111226	39.3779
IL12B	rs116377621	G	A	-0.2629	0.020785	1.14e-36	0.04182	35366	0.00450334	159.977
IL12B	rs12514042	T	C	0.1421	0.02575	3.421e-08	0.02735	35365	0.000860372	30.4515
IL12B	rs13158921	T	C	-0.1929	0.024758	6.634e-15	0.03003	35368	0.00171348	60.7028
IL12B	rs137932631	G	A	-0.2706	0.036226	8.031e-14	0.01361	35366	0.00157523	55.7944
IL12B	rs138384115	GTTTTG	GTTTTT	0.1617	0.012433	1.143e-38	0.13138	35361	0.0047607	169.139
IL12B	rs138703776	A	T	0.2188	0.028722	2.579e-14	0.02141	35368	0.00163811	58.0284
IL12B	rs138988771	A	G	0.1572	0.020114	5.469e-15	0.04488	35369	0.001724	61.0778
IL12B	rs139298380	A	G	-0.1532	0.017721	5.375e-18	0.05534	35367	0.00210875	74.7337
IL12B	rs142264032	C	T	-0.6952	0.031992	1.052e-104	0.01722	35369	0.0131751	472.185
IL12B	rs144281948	A	G	-0.2693	0.025577	6.342e-26	0.02672	35369	0.00312458	110.853
IL12B	rs149526527	A	G	0.1402	0.025636	4.531e-08	0.0271	35368	0.000844924	29.9069
IL12B	rs17057303	C	T	-0.3137	0.032727	9.206e-22	0.01694	35366	0.00259122	91.8739
IL12B	rs17645003	T	C	0.1139	0.018596	9.067e-10	0.05251	35369	0.00105956	37.5132
IL12B	rs182890756	T	C	0.1571	0.023772	3.879e-11	0.03326	35360	0.00123359	43.6713
IL12B	rs3181226	G	C	0.1838	0.01076	2.046e-65	0.17625	35367	0.00818276	291.771
IL12B	rs31970	G	A	0.1479	0.022658	6.691e-11	0.03598	35360	0.00120353	42.6058
IL12B	rs3213120	T	C	-0.9223	0.026304	1e-200	0.02501	35366	0.033595	1229.35
IL12B	rs35595526	A	C	0.1192	0.021422	2.631e-08	0.03867	35366	0.000874715	30.9605
IL12B	rs57720492	G	A	0.17	0.011239	1.084e-51	0.16082	35368	0.00642735	228.78
IL12B	rs62385365	A	G	0.1129	0.010975	8.081e-25	0.17423	35369	0.00298304	105.817
IL12B	rs62386479	A	G	0.1244	0.015212	2.89e-16	0.0821	35369	0.00188723	66.8719
IL12B	rs67017827	A	G	-0.1536	0.020213	2.986e-14	0.04442	35361	0.00163038	57.7426
IL12B	rs67101146	C	T	0.0753	0.010563	1.016e-12	0.19573	35357	0.00143521	50.8149
IL12B	rs6869898	A	T	0.1596	0.027083	3.794e-09	0.0238	35365	0.000981007	34.7254
IL12B	rs6877404	A	C	0.2368	0.017613	3.295e-41	0.0584	35365	0.00508521	180.747
IL12B	rs6883429	T	C	-0.085	0.010698	1.938e-15	0.18463	35369	0.0017817	63.126
IL12B	rs6885822	A	G	-0.1275	0.01215	9.259e-26	0.13293	35369	0.00310381	110.114
IL12B	rs71593304	A	G	-0.1381	0.023529	4.375e-09	0.03361	35368	0.000973077	34.4474
IL12B	rs72810115	G	A	-0.3817	0.038753	6.89e-23	0.0115	35362	0.00273594	97.0083
IL12B	rs74378324	C	T	0.0834	0.014685	1.354e-08	0.08871	35359	0.000911356	32.2522
IL12B	rs74590973	A	G	-0.0985	0.015578	2.567e-10	0.07589	35369	0.00112911	39.9783
IL12B	rs76968394	C	T	0.1067	0.0186	9.664e-09	0.05227	35364	0.000929689	32.9062
IL12B	rs7715501	A	T	-0.0726	0.008595	2.989e-17	0.36293	35369	0.00201318	71.3439
IL12B	rs7730340	G	A	-0.0538	0.0097	2.92e-08	0.24721	35369	0.000869002	30.7607
IL12B	rs7736632	A	G	-0.0854	0.008325	1.081e-24	0.46513	35365	0.00296677	105.226
IL12B	rs77935180	A	G	0.1479	0.026655	2.877e-08	0.0246	35367	0.000869767	30.7861
IL12B	rs78517562	A	T	-0.1525	0.026357	7.215e-09	0.02629	35369	0.000945614	33.4752
IL12B	rs824876	G	A	-0.0939	0.010116	1.656e-20	0.21317	35369	0.00243016	86.1567
CCL8	rs1007745	ATAAATACT	ATAAATATT	0.1226	0.012958	3.03e-21	0.1195	35370	0.00252448	89.5118
CCL8	rs1029742	A	G	0.0646	0.009117	1.387e-12	0.30058	35367	0.00141758	50.2038
CCL8	rs1030603	T	C	-0.2044	0.020081	2.467e-24	0.046	35371	0.00292061	103.602
CCL8	rs1038794	A	G	0.1586	0.027373	6.873e-09	0.02438	35374	0.000948125	33.5689
CCL8	rs10491112	T	C	0.0938	0.017028	3.616e-08	0.06331	35371	0.000857154	30.3427
CCL8	rs10512449	C	T	-0.0835	0.010517	2.035e-15	0.19605	35373	0.00177887	63.0325
CCL8	rs10512462	G	A	-0.563	0.015534	1e-200	0.07829	35372	0.0358059	1313.49
CCL8	rs11080279	T	A	0.1331	0.020168	4.122e-11	0.04588	35371	0.00122984	43.5518
CCL8	rs11080287	A	G	-0.0684	0.01081	2.493e-10	0.18238	35369	0.0011307	40.0347
CCL8	rs111341077	A	T	-0.2376	0.028989	2.48e-16	0.02157	35368	0.0018958	67.1741
CCL8	rs111606652	G	A	0.2663	0.023401	5.262e-30	0.03199	35372	0.00364776	129.494
CCL8	rs111629662	A	G	-0.3572	0.032374	2.632e-28	0.0167	35368	0.00343026	121.732
CCL8	rs112089467	A	G	-0.2371	0.027098	2.141e-18	0.02522	35371	0.00215974	76.5533
CCL8	rs112182370	A	G	-0.1416	0.015326	2.486e-20	0.08172	35365	0.00240795	85.358
CCL8	rs112829124	T	C	-0.2927	0.026868	1.23e-27	0.02561	35371	0.00334405	118.673
CCL8	rs11651946	C	T	-0.1037	0.008559	8.746e-34	0.38574	35366	0.00413358	146.787
CCL8	rs11652938	A	G	0.1029	0.011911	5.65e-18	0.14425	35370	0.00210564	74.6294
CCL8	rs11656324	C	G	0.0791	0.009003	1.555e-18	0.30933	35371	0.00217763	77.1887
CCL8	rs11656431	A	G	0.19	0.028329	1.989e-11	0.0227	35371	0.00127012	44.9801
CCL8	rs11656471	T	G	-0.1594	0.009949	8.902e-58	0.22505	35371	0.00720493	256.681
CCL8	rs11658857	G	A	0.1521	0.012103	3.208e-36	0.13861	35369	0.00444544	157.924
CCL8	rs117156824	T	C	0.273	0.041689	5.815e-11	0.01108	35368	0.001211	42.8803
CCL8	rs117340105	A	G	0.1669	0.023976	3.378e-12	0.03168	35371	0.0013681	48.4546
CCL8	rs117446927	C	T	0.1404	0.024454	9.39e-09	0.03103	35366	0.000931202	32.9617
CCL8	rs117491983	T	C	0.1471	0.020688	1.157e-12	0.0424	35373	0.00142724	50.555
CCL8	rs117516277	G	A	-0.3146	0.023633	1.976e-40	0.03276	35368	0.00498538	177.197
CCL8	rs117620244	T	C	0.2282	0.032256	1.498e-12	0.01676	35367	0.00141318	50.0479
CCL8	rs117627996	T	A	-0.9626	0.013666	1e-200	0.04749	35370	0.123017	4961.17
CCL8	rs117814539	T	C	-0.9386	0.016253	1e-200	0.03328	35374	0.0861553	3334.8
CCL8	rs117919833	C	A	-0.2888	0.039992	5.142e-13	0.01073	35375	0.00147201	52.1463
CCL8	rs117958408	G	A	0.2092	0.029153	7.178e-13	0.02012	35371	0.00145371	51.4911
CCL8	rs117971411	G	A	-0.4261	0.030164	2.62e-45	0.01981	35371	0.00560989	199.536
CCL8	rs117980760	G	C	0.1473	0.024253	1.252e-09	0.03183	35368	0.00104186	36.885
CCL8	rs118003219	C	A	-0.2539	0.033585	4.033e-14	0.01573	35367	0.00161337	57.1492
CCL8	rs118005818	G	A	0.1217	0.021074	7.706e-09	0.03971	35373	0.000941903	33.3475
CCL8	rs118165375	T	C	0.153	0.019913	1.547e-14	0.04891	35375	0.00166605	59.0316
CCL8	rs12449765	G	A	-0.095	0.010175	9.99e-21	0.21934	35366	0.0024588	87.1673
CCL8	rs12450373	A	G	0.1398	0.012027	3.114e-31	0.14312	35371	0.00380537	135.106
CCL8	rs12452554	C	G	-0.166	0.024379	9.817e-12	0.03108	35370	0.00130912	46.3618
CCL8	rs12452818	A	G	-0.3371	0.006084	1e-200	0.37684	35374	0.0798565	3069.83
CCL8	rs12453775	T	C	0.0806	0.011135	4.545e-13	0.17142	35372	0.00147906	52.392
CCL8	rs12602965	C	T	-0.0529	0.009475	2.363e-08	0.26435	35375	0.000880388	31.1694
CCL8	rs12943905	T	C	-0.1288	0.022643	1.284e-08	0.03491	35374	0.000913866	32.3548
CCL8	rs138609024	C	T	-0.3237	0.038746	6.579e-17	0.01244	35374	0.00196921	69.7922
CCL8	rs138717952	TG	T	-0.1181	0.018545	1.911e-10	0.05132	35373	0.00114519	40.5529
CCL8	rs139085292	C	T	0.2704	0.03517	1.491e-14	0.01351	35371	0.00166838	59.1077
CCL8	rs140163684	A	C	0.2704	0.026809	6.356e-24	0.0252	35370	0.00286794	101.725
CCL8	rs140933322	G	A	0.324	0.041226	3.868e-15	0.01045	35370	0.00174323	61.7622
CCL8	rs140976744	T	C	0.3979	0.026914	1.858e-49	0.02393	35369	0.00614176	218.558
CCL8	rs141118248	G	A	-0.5153	0.02813	5.873e-75	0.02191	35371	0.00939794	335.549
CCL8	rs143972888	T	A	0.2583	0.036248	1.034e-12	0.01388	35366	0.00143374	50.7757
CCL8	rs144101664	T	C	-0.7204	0.026985	5.208e-157	0.02404	35371	0.0197511	712.653
CCL8	rs144488620	C	G	-0.3282	0.038721	2.33e-17	0.01133	35364	0.00202741	71.8389
CCL8	rs146400806	A	G	-0.2288	0.025935	1.123e-18	0.02594	35370	0.00219558	77.8243
CCL8	rs146617285	A	G	-0.2292	0.027997	2.687e-16	0.02302	35374	0.00189104	67.0165
CCL8	rs147683529	A	G	0.2251	0.022177	3.31e-24	0.03614	35373	0.00290409	103.02
CCL8	rs148762793	C	T	0.246	0.041176	2.311e-09	0.01065	35367	0.0010082	35.6909
CCL8	rs1504580	A	T	-0.1754	0.024274	4.985e-13	0.03094	35375	0.0014738	52.2098
CCL8	rs159268	G	A	-0.1689	0.009651	1.429e-68	0.25311	35373	0.00858418	306.26
CCL8	rs16969454	C	T	0.3699	0.007014	1e-200	0.23203	35373	0.0728944	2781.07
CCL8	rs16970010	G	C	0.1239	0.01652	6.376e-14	0.06967	35371	0.00158776	56.2468
CCL8	rs17250896	T	C	-0.0828	0.01192	3.754e-12	0.14485	35371	0.00136229	48.2485
CCL8	rs185768634	T	C	-0.1878	0.020582	7.206e-20	0.04391	35373	0.00234814	83.2514
CCL8	rs1871892	C	T	0.0643	0.008877	4.363e-13	0.33146	35370	0.00148119	52.4644
CCL8	rs188234686	G	C	0.2631	0.034633	3.034e-14	0.01512	35373	0.00162885	57.7081
CCL8	rs189119593	T	C	-0.1737	0.026147	3.067e-11	0.02713	35370	0.00124618	44.1297
CCL8	rs189463081	A	C	-0.2871	0.038438	8.072e-14	0.0123	35373	0.00157467	55.7854
CCL8	rs190850301	T	C	-0.6185	0.033669	2.289e-75	0.01549	35374	0.00944956	337.438
CCL8	rs191088251	A	G	0.2472	0.033887	2.992e-13	0.01616	35366	0.00150242	53.2116
CCL8	rs192663730	A	G	0.1871	0.031644	3.365e-09	0.01832	35374	0.000987306	34.9575
CCL8	rs2005314	T	C	0.1776	0.010364	7.923e-66	0.20771	35372	0.00823343	293.634
CCL8	rs2079662	T	C	-0.5724	0.009954	1e-200	0.09829	35372	0.0854932	3306.58
CCL8	rs2127828	C	G	0.0729	0.009536	2.094e-14	0.25794	35368	0.00164966	58.4384
CCL8	rs213141	T	C	0.262	0.028093	1.096e-20	0.02347	35366	0.00245332	86.9725
CCL8	rs2188583	A	G	0.092	0.00944	1.925e-22	0.26778	35370	0.00267813	94.9745
CCL8	rs2215230	A	G	-0.1666	0.009543	3.04e-68	0.25834	35366	0.00854413	304.758
CCL8	rs2338968	C	T	-0.0757	0.008557	9.058e-19	0.41083	35371	0.00220771	78.2572
CCL8	rs2375912	G	A	-0.096	0.017256	2.646e-08	0.06332	35370	0.000874273	30.9484
CCL8	rs2637348	C	T	-0.1126	0.009002	6.742e-36	0.32083	35373	0.00440362	156.45
CCL8	rs295089	A	G	0.1523	0.025679	3.011e-09	0.02735	35370	0.000993521	35.1738
CCL8	rs3033297	GCGCACACGCGCGCGCACACACACA	GCGCACACGCGCGCGCACACACA	0.1353	0.009991	8.766e-42	0.22462	35374	0.0051576	183.38
CCL8	rs3135980	C	T	-0.1243	0.010113	1.015e-34	0.22264	35371	0.00425289	151.063
CCL8	rs3138032	A	G	0.2098	0.014803	1.344e-45	0.08789	35372	0.00564667	200.857
CCL8	rs317343	G	A	0.056	0.010052	2.531e-08	0.22319	35373	0.000876634	31.0346
CCL8	rs320640	T	C	-0.0769	0.008406	5.791e-20	0.44445	35375	0.00236021	83.6853
CCL8	rs34202026	T	A	-0.7153	0.030419	2.889e-122	0.01915	35373	0.0153914	552.92
CCL8	rs35490644	G	T	0.238	0.01876	7.004e-37	0.05376	35374	0.00452932	160.94
CCL8	rs35735275	T	C	0.131	0.020842	3.268e-10	0.04324	35369	0.00111572	39.5038
CCL8	rs35842727	G	C	0.1722	0.019083	1.82e-19	0.05031	35374	0.00229663	81.4233
CCL8	rs35960966	A	G	-0.1064	0.014125	4.971e-14	0.09818	35363	0.00160199	56.739
CCL8	rs3744358	G	T	0.0898	0.009009	2.117e-23	0.31128	35371	0.00280113	99.3516
CCL8	rs3744516	G	A	0.1515	0.008331	6.843e-74	0.4526	35372	0.00926254	330.679
CCL8	rs399240	G	C	-0.3928	0.005954	1e-200	0.42924	35369	0.109572	4352.12
CCL8	rs4041613	G	C	0.1471	0.009113	1.299e-58	0.30225	35371	0.00731253	260.542
CCL8	rs41527847	T	C	0.2952	0.012885	3.709e-116	0.12159	35372	0.014622	524.855
CCL8	rs4305127	T	C	0.051	0.008582	2.801e-09	0.4105	35372	0.000997402	35.3133
CCL8	rs4411544	G	A	0.2502	0.035016	8.984e-13	0.0152	35368	0.00144147	51.0525
CCL8	rs4432293	T	C	0.0861	0.008471	2.876e-24	0.39553	35371	0.00291221	103.303
CCL8	rs4577134	C	G	0.0758	0.008442	2.743e-19	0.44597	35366	0.00227443	80.6164
CCL8	rs4622557	G	A	-0.1107	0.008337	3.082e-40	0.49375	35369	0.00496013	176.299
CCL8	rs4795929	C	T	-0.0567	0.009398	1.607e-09	0.27281	35366	0.00102816	36.3974
CCL8	rs4795936	G	A	0.1597	0.014701	1.719e-27	0.08575	35370	0.00332533	118.003
CCL8	rs4796033	T	C	0.1144	0.011706	1.472e-22	0.15088	35370	0.00269295	95.5016
CCL8	rs55644062	T	C	0.0651	0.009376	3.841e-12	0.27811	35373	0.00136102	48.2061
CCL8	rs56056763	T	A	0.0603	0.008444	9.277e-13	0.43202	35375	0.00143951	50.9934
CCL8	rs56406346	C	A	0.1178	0.011002	9.385e-27	0.17534	35365	0.00323123	114.636
CCL8	rs57607553	A	G	-0.221	0.02932	4.791e-14	0.0208	35370	0.00160371	56.811
CCL8	rs57652827	A	C	0.0791	0.009482	7.279e-17	0.26176	35363	0.00196404	69.5871
CCL8	rs62054929	A	G	0.1953	0.023893	2.982e-16	0.0313	35373	0.00188526	66.8096
CCL8	rs62055778	G	C	0.0933	0.014447	1.059e-10	0.09214	35374	0.00117764	41.7045
CCL8	rs62056818	C	T	0.0639	0.008404	2.887e-14	0.44584	35371	0.00163182	57.8103
CCL8	rs62057448	T	C	-0.0642	0.010242	3.643e-10	0.21144	35371	0.00110961	39.2895
CCL8	rs62062164	C	T	-0.2214	0.019121	5.287e-31	0.05141	35365	0.00377674	134.063
CCL8	rs71377488	G	A	-0.1631	0.028386	9.153e-09	0.02163	35375	0.000932391	33.0122
CCL8	rs716408	G	A	0.1776	0.021187	5.186e-17	0.04072	35370	0.00198267	70.2623
CCL8	rs7207118	C	T	-0.0773	0.009882	5.181e-15	0.23899	35369	0.00172701	61.185
CCL8	rs7207803	C	A	0.1571	0.010458	5.327e-51	0.1995	35371	0.00633937	225.648
CCL8	rs7207960	T	C	-0.1044	0.012371	3.201e-17	0.13005	35371	0.00200942	71.2142
CCL8	rs7215597	A	G	-0.0997	0.011656	1.19e-17	0.1518	35371	0.00206418	73.1588
CCL8	rs7219880	G	A	-0.0548	0.009642	1.318e-08	0.25644	35367	0.000912499	32.3
CCL8	rs72814910	G	A	-0.1419	0.019383	2.464e-13	0.05141	35374	0.0015128	53.5918
CCL8	rs72814937	T	C	-0.1255	0.019326	8.365e-11	0.0504	35373	0.00119073	42.1676
CCL8	rs72821031	T	C	-0.3732	0.025383	6.209e-49	0.02874	35373	0.00607407	216.159
CCL8	rs72821157	A	G	0.1287	0.013635	3.763e-21	0.1045	35374	0.00251229	89.0886
CCL8	rs72822909	T	C	-0.1297	0.016759	1.002e-14	0.0665	35367	0.00169064	59.8907
CCL8	rs72822935	T	C	0.2207	0.025588	6.403e-18	0.02849	35371	0.00209881	74.3888
CCL8	rs72825048	A	G	-0.8063	0.015235	1e-200	0.0394	35374	0.0733719	2800.81
CCL8	rs72827021	A	G	0.3375	0.023811	1.326e-45	0.03272	35372	0.00564772	200.894
CCL8	rs72827075	A	G	0.2321	0.014824	2.962e-55	0.08477	35373	0.00688253	245.129
CCL8	rs73276641	T	C	0.1786	0.025013	9.309e-13	0.02879	35371	0.00143932	50.9808
CCL8	rs73990107	A	G	0.0815	0.013924	4.828e-09	0.09861	35371	0.000967652	34.258
CCL8	rs7406221	G	A	0.0973	0.010071	4.405e-22	0.21746	35364	0.00263254	93.3374
CCL8	rs740633	G	T	-0.2431	0.024173	8.601e-24	0.02997	35371	0.00285116	101.131
CCL8	rs74328708	A	G	0.1175	0.015562	4.331e-14	0.07922	35371	0.00160916	57.006
CCL8	rs74829193	T	C	-0.2283	0.018675	2.288e-34	0.0525	35371	0.00420738	149.44
CCL8	rs75161959	T	C	0.3019	0.027091	7.677e-29	0.02545	35374	0.0034984	124.18
CCL8	rs75365264	G	A	-0.4379	0.037177	5.03e-32	0.01273	35368	0.00390742	138.732
CCL8	rs75410920	C	A	0.1515	0.013242	2.616e-30	0.11275	35372	0.00368684	130.886
CCL8	rs75474473	C	T	0.2166	0.037673	8.953e-09	0.01259	35375	0.000933586	33.0546
CCL8	rs756882	A	G	-0.0945	0.00842	3.129e-29	0.47763	35371	0.00354853	125.955
CCL8	rs75928340	C	T	-0.1637	0.019652	8.093e-17	0.04689	35372	0.00195782	69.384
CCL8	rs76105710	G	A	-0.205	0.035435	7.239e-09	0.01427	35373	0.000945279	33.4671
CCL8	rs76492376	A	G	0.235	0.035612	4.14e-11	0.01477	35370	0.00122963	43.543
CCL8	rs76727125	ACGTGTATTTGTAACAGCATGTTGTGAGCCT	ACGTGTATTTGTAACAGCATGTTGTAAGCCT	0.2356	0.019183	1.134e-34	0.04778	35374	0.00424605	150.832
CCL8	rs77086916	TG	CG	0.3908	0.021066	8.037e-77	0.04041	35374	0.0096351	344.128
CCL8	rs772111	T	C	-0.2854	0.025092	5.637e-30	0.02858	35366	0.00364473	129.364
CCL8	rs77439074	T	G	-0.1094	0.018483	3.239e-09	0.05324	35372	0.000989464	35.032
CCL8	rs77563125	G	A	-0.2505	0.025468	7.874e-23	0.02713	35366	0.00272806	96.7389
CCL8	rs77956144	A	G	-0.152	0.019286	3.242e-15	0.04904	35374	0.0017529	62.1124
CCL8	rs78439158	A	G	-0.1916	0.025564	6.631e-14	0.02725	35374	0.00158548	56.1706
CCL8	rs78631594	A	G	0.2579	0.030633	3.798e-17	0.01895	35369	0.00200001	70.876
CCL8	rs78655733	T	G	-0.0965	0.015609	6.312e-10	0.07913	35374	0.00107932	38.2191
CCL8	rs78785632	T	A	-0.2186	0.027261	1.068e-15	0.02229	35370	0.00181465	64.2972
CCL8	rs80030306	T	C	0.0864	0.01571	3.806e-08	0.07718	35375	0.000854294	30.2448
CCL8	rs80219280	T	G	-0.9895	0.012693	1e-200	0.05597	35373	0.146614	6076.85
CCL8	rs8069555	A	G	-0.0826	0.014101	4.693e-09	0.0986	35373	0.000969097	34.3112
CCL8	rs8070150	G	A	-0.3801	0.026401	5.388e-47	0.02572	35370	0.00582616	207.267
CCL8	rs8071766	A	T	0.2385	0.024826	7.467e-22	0.02932	35364	0.00260297	92.2866
CCL8	rs8075337	C	T	-0.1976	0.008314	7.524e-125	0.46225	35374	0.0157177	564.845
CCL8	rs9891703	T	C	-0.0532	0.008435	2.849e-10	0.43466	35369	0.00112342	39.7767
CCL8	rs9893682	T	C	0.07	0.011479	1.075e-09	0.15796	35364	0.00105044	37.1846
CCL8	rs9905691	G	C	0.0673	0.010025	1.907e-11	0.22578	35366	0.00127269	45.0647
CCL8	rs9911782	T	C	-0.3037	0.03879	4.904e-15	0.01162	35374	0.00172987	61.2951
MCF2L	rs1006879	T	C	-0.0606	0.008127	8.849e-14	0.49609	34912	0.00159008	55.5981
MCF2L	rs112414406	T	C	0.1677	0.029825	1.879e-08	0.0189	34900	0.000905079	31.6141
MCF2L	rs12864060	C	T	0.1424	0.013221	4.747e-27	0.10453	34900	0.00331303	116.002
MCF2L	rs3011487	C	T	0.2089	0.008039	6.985e-149	0.48488	34900	0.0189812	675.224
MCF2L	rs3011547	T	C	0.0817	0.008678	4.771e-21	0.32479	34896	0.00253354	88.6298
MCF2L	rs34743317	GTCTAGCCCCAGCCCCGGCCCCG	GTCCAGCCCCAGCCCCGGCCCCG	-0.0684	0.00925	1.42e-13	0.26024	34897	0.00156445	54.6769
MCF2L	rs72661975	C	T	0.0934	0.012719	2.083e-13	0.11381	34893	0.00154305	53.9216
MCF2L	rs77833530	C	T	0.0834	0.014436	7.602e-09	0.08518	34921	0.000954854	33.3744
MCF2L	rs8002283	G	A	0.0563	0.008145	4.763e-12	0.49401	34894	0.00136738	47.776
MCF2L	rs9549321	A	G	-0.1528	0.0132	5.448e-31	0.10515	34900	0.0038248	133.99
NUDT12	rs10900870	G	C	0.0488	0.008086	1.586e-09	0.4609	35344	0.00102946	36.4206
NUDT12	rs113870602	C	G	-0.0811	0.010482	1.019e-14	0.17955	35344	0.00169084	59.8589
NUDT12	rs114639578	T	C	-0.1706	0.028623	2.52e-09	0.0202	35342	0.00100415	35.5225
NUDT12	rs114878471	A	G	0.1844	0.033425	3.452e-08	0.01522	35343	0.000860403	30.4337
NUDT12	rs115090895	T	C	-0.4983	0.027102	1.696e-75	0.02083	35342	0.00947444	338.029
NUDT12	rs1152153	G	A	-0.1096	0.017001	1.143e-10	0.05959	35342	0.00117455	41.5573
NUDT12	rs115521825	A	G	-0.3307	0.031373	5.595e-26	0.01634	35342	0.00313402	111.105
NUDT12	rs115774322	G	A	0.2436	0.039855	9.83e-10	0.01029	35342	0.00105594	37.3563
NUDT12	rs116355189	A	G	-0.1695	0.022137	1.907e-14	0.03298	35343	0.00165607	58.6242
NUDT12	rs12654624	T	C	-0.098	0.008255	1.663e-32	0.38158	35342	0.0039719	140.927
NUDT12	rs1345614	T	C	0.0929	0.008271	2.839e-29	0.37584	35342	0.00355694	126.151
NUDT12	rs140216035	A	G	-0.1936	0.025164	1.43e-14	0.02518	35344	0.00167189	59.1871
NUDT12	rs1420863	G	C	-0.0656	0.011297	6.362e-09	0.14865	35342	0.000953183	33.7176
NUDT12	rs142454125	A	C	-0.1649	0.028971	1.256e-08	0.02031	35341	0.000915878	32.3959
NUDT12	rs143993354	T	C	-0.4136	0.024249	3.147e-65	0.02819	35343	0.00816413	290.903
NUDT12	rs145026971	A	C	-0.2345	0.032725	7.729e-13	0.01521	35342	0.00145079	51.3454
NUDT12	rs147684933	T	C	0.2019	0.02818	7.8e-13	0.02117	35344	0.00145026	51.3294
NUDT12	rs149522178	C	A	-0.2216	0.039394	1.853e-08	0.01103	35343	0.000894514	31.6413
NUDT12	rs150409353	TTTTTTTTTG	TTTTTTTTG	-0.1378	0.01063	1.986e-38	0.17203	35341	0.00473252	168.038
NUDT12	rs17154813	A	T	-0.1189	0.019457	9.898e-10	0.04411	35343	0.00105548	37.3411
NUDT12	rs17361885	T	A	-0.1223	0.010997	9.886e-29	0.15692	35341	0.00348745	123.674
NUDT12	rs185803780	C	T	-0.1951	0.029648	4.687e-11	0.01881	35339	0.00122388	43.3011
NUDT12	rs1895218	A	C	0.051	0.009337	4.706e-08	0.24362	35344	0.000843419	29.8333
NUDT12	rs193177917	GA	GC	-0.2365	0.035106	1.619e-11	0.01293	35342	0.00128248	45.3811
NUDT12	rs246380	C	G	-0.1231	0.019708	4.209e-10	0.04352	35344	0.00110265	39.0127
NUDT12	rs2657471	T	G	-0.1125	0.01482	3.169e-14	0.08255	35340	0.00162793	57.6214
NUDT12	rs2657477	G	A	0.055	0.008389	5.531e-11	0.35349	35340	0.00121482	42.9814
NUDT12	rs28626471	G	C	-0.1282	0.013235	3.442e-22	0.10159	35341	0.00264788	93.8218
NUDT12	rs370918484	TTGTGTGTGTGTGTGTGTGTG	TTGTGTGTGTGTGTGTGTG	-0.1464	0.02124	5.482e-12	0.0373	35339	0.00134257	47.506
NUDT12	rs3857361	G	A	0.0675	0.008178	1.53e-16	0.41752	35343	0.00192386	68.1222
NUDT12	rs4122274	A	G	0.049	0.008461	6.976e-09	0.34799	35344	0.000948028	33.537
NUDT12	rs443022	A	G	-0.1071	0.009785	7.038e-28	0.21967	35343	0.00337819	119.793
NUDT12	rs6867791	G	A	-0.0554	0.009697	1.111e-08	0.22224	35343	0.000922657	32.6377
NUDT12	rs6885931	A	G	-0.187	0.031606	3.285e-09	0.01622	35343	0.000989489	35.0042
NUDT12	rs71586380	C	G	-0.1953	0.033186	3.982e-09	0.01566	35342	0.00097899	34.6314
NUDT12	rs71586552	T	A	0.0754	0.011601	8.05e-11	0.14323	35343	0.00119379	42.2403
NUDT12	rs72772323	CCA	CCG	0.0785	0.012154	1.057e-10	0.1215	35342	0.00117896	41.7135
NUDT12	rs72773277	G	A	-0.1627	0.027136	2.025e-09	0.02267	35342	0.00101613	35.9467
NUDT12	rs73190041	G	C	-0.5032	0.009424	1e-200	0.14708	35343	0.0746474	2850.93
NUDT12	rs75790388	C	A	-0.3086	0.023014	5.324e-41	0.03109	35343	0.00506175	179.797
NUDT12	rs76160968	G	A	0.1384	0.018661	1.204e-13	0.04985	35343	0.0015539	55.0019
NUDT12	rs77109671	G	A	0.0999	0.016698	2.192e-09	0.06235	35343	0.00101172	35.7913
NUDT12	rs77644652	TTTTAAAAAA	TTTAAAAAAA	-0.1915	0.026453	4.508e-13	0.02297	35343	0.00148061	52.4038
NUDT12	rs78175259	T	C	-0.1297	0.016298	1.746e-15	0.06552	35342	0.00178872	63.3267
NUDT12	rs9327887	A	G	0.2012	0.009692	1.023e-95	0.21992	35343	0.0120465	430.928
IL15RA	rs10508300	G	C	-0.1613	0.016283	3.93e-23	0.07664	35359	0.00276756	98.124
IL15RA	rs10905916	C	G	0.2035	0.010398	2.72e-85	0.22015	35354	0.0107179	383.005
IL15RA	rs11256251	T	C	-0.1331	0.019568	1.032e-11	0.05012	35358	0.0013068	46.2635
IL15RA	rs11256610	A	G	0.2454	0.028639	1.045e-17	0.02185	35359	0.0020722	73.4191
IL15RA	rs11256929	A	C	0.2029	0.027302	1.072e-13	0.02554	35356	0.00155968	55.2269
IL15RA	rs11258630	T	C	0.1679	0.023796	1.717e-12	0.03344	35379	0.0014052	49.7816
IL15RA	rs113403802	T	C	-0.2692	0.020125	8.322e-41	0.04707	35359	0.00503485	178.918
IL15RA	rs116171295	C	G	-0.2989	0.036012	1.041e-16	0.01465	35356	0.00194468	68.8863
IL15RA	rs116888396	C	T	-0.2393	0.033688	1.218e-12	0.01583	35371	0.00142452	50.4557
IL15RA	rs117318602	A	G	-0.1449	0.024224	2.208e-09	0.03375	35353	0.00101107	35.7784
IL15RA	rs12240985	G	C	-0.3091	0.026111	2.482e-32	0.0277	35359	0.0039476	140.128
IL15RA	rs12244238	G	A	-0.108	0.008803	1.347e-34	0.39702	35359	0.00423878	150.509
IL15RA	rs12258316	CAGATTTTTTTTA	AAGATTTTTTTTA	-0.0506	0.008766	7.815e-09	0.4037	35363	0.000941326	33.3176
IL15RA	rs12259375	T	G	-0.1454	0.015476	5.697e-21	0.08651	35353	0.00249059	88.2646
IL15RA	rs12260706	T	G	0.0707	0.009875	8.099e-13	0.25763	35365	0.00144731	51.2555
IL15RA	rs12571627	A	C	0.0566	0.009762	6.723e-09	0.25893	35373	0.000949447	33.6148
IL15RA	rs12722557	T	C	0.1574	0.020546	1.847e-14	0.04661	35359	0.00165705	58.6854
IL15RA	rs138479843	A	G	-0.1901	0.022005	5.683e-18	0.03891	35360	0.00210617	74.6272
IL15RA	rs139415196	G	A	-0.1597	0.027161	4.109e-09	0.02773	35349	0.00097705	34.5696
IL15RA	rs140904447	T	C	-0.2305	0.031287	1.742e-13	0.01918	35348	0.00153314	54.2737
IL15RA	rs141200498	A	G	-0.1107	0.015684	1.69e-12	0.08257	35370	0.00140649	49.8146
IL15RA	rs143034162	A	G	-0.2737	0.038107	6.852e-13	0.01267	35372	0.00145629	51.5841
IL15RA	rs143547051	T	C	-0.2019	0.03471	6.001e-09	0.01541	35374	0.000955573	33.8329
IL15RA	rs143607770	A	G	-0.3048	0.035305	5.956e-18	0.01564	35359	0.0021035	74.5303
IL15RA	rs144293331	A	T	-0.2368	0.043375	4.779e-08	0.01016	35378	0.000841754	29.803
IL15RA	rs145810566	G	C	-0.2454	0.02768	7.599e-19	0.02529	35372	0.00221714	78.5945
IL15RA	rs148235865	T	C	-0.224	0.019131	1.146e-31	0.05381	35372	0.00386083	137.087
IL15RA	rs148513083	G	A	0.1104	0.014885	1.198e-13	0.09076	35359	0.00155334	55.0067
IL15RA	rs148841219	C	T	-0.1942	0.032891	3.539e-09	0.01707	35368	0.000984705	34.8594
IL15RA	rs149447514	T	C	-0.2189	0.035064	4.294e-10	0.01527	35374	0.00110054	38.9712
IL15RA	rs151246931	T	C	0.164	0.02658	6.831e-10	0.02646	35373	0.00107507	38.0674
IL15RA	rs17151105	A	G	0.1337	0.012664	4.689e-26	0.13122	35354	0.00314279	111.454
IL15RA	rs181435922	T	C	0.267	0.033139	7.814e-16	0.01654	35359	0.00183251	64.9111
IL15RA	rs183820419	G	A	0.2396	0.041748	9.512e-09	0.01003	35353	0.000930833	32.9365
IL15RA	rs184979795	G	C	-0.2942	0.041378	1.16e-12	0.01125	35362	0.00142754	50.5501
IL15RA	rs186453860	T	C	0.2002	0.030595	6.005e-11	0.01931	35359	0.00120949	42.8157
IL15RA	rs1972409	C	T	-0.2223	0.009183	1.879e-129	0.31241	35355	0.0163049	585.983
IL15RA	rs3136630	T	C	-0.3279	0.010349	1e-200	0.21953	35359	0.0276075	1003.83
IL15RA	rs34260721	GT	G	-0.1335	0.009495	6.641e-45	0.28518	35359	0.0055597	197.673
IL15RA	rs34277279	A	C	-0.0625	0.009888	2.606e-10	0.25846	35374	0.00112815	39.9502
IL15RA	rs34353319	T	A	-0.134	0.010487	2.183e-37	0.21948	35358	0.00459641	163.261
IL15RA	rs34410111	A	G	0.1441	0.009521	9.512e-52	0.28297	35358	0.00643681	229.054
IL15RA	rs34666696	A	G	0.0606	0.009832	7.115e-10	0.26189	35372	0.00107284	37.9872
IL15RA	rs35335304	G	C	-0.0679	0.009838	5.134e-12	0.26044	35355	0.00134552	47.6323
IL15RA	rs4077511	A	G	0.0742	0.011535	1.254e-10	0.16897	35374	0.00116837	41.376
IL15RA	rs41294013	C	T	-0.2495	0.03565	2.584e-12	0.01434	35357	0.00138339	48.9776
IL15RA	rs41294655	T	G	-0.1654	0.028813	9.444e-09	0.02393	35359	0.000931085	32.9511
IL15RA	rs41294657	G	T	0.1463	0.017405	4.263e-17	0.06749	35359	0.00199422	70.6506
IL15RA	rs41294659	G	A	-0.1561	0.013206	3.072e-32	0.1202	35359	0.00393596	139.714
IL15RA	rs41295263	C	A	0.3381	0.033634	8.981e-24	0.0157	35357	0.00284983	101.044
IL15RA	rs41295265	G	A	-0.2593	0.021676	5.581e-33	0.04246	35357	0.00403104	143.094
IL15RA	rs4310524	TAA	TAG	-0.0814	0.008645	4.696e-21	0.45659	35356	0.00250131	88.6532
IL15RA	rs45451594	A	G	-0.0941	0.011946	3.359e-15	0.15287	35378	0.00175081	62.0454
IL15RA	rs4747882	T	A	0.1644	0.009817	5.95e-63	0.25751	35358	0.00786914	280.428
IL15RA	rs4749858	G	C	0.6342	0.025542	4.24e-136	0.0284	35359	0.017137	616.479
IL15RA	rs56251728	G	A	0.0882	0.010438	2.912e-17	0.21674	35377	0.00201422	71.3967
IL15RA	rs585881	A	G	-0.0704	0.010776	6.441e-11	0.20066	35354	0.00120578	42.6781
IL15RA	rs58872114	GA	G	0.0905	0.011077	3.074e-16	0.18816	35357	0.00188434	66.7465
IL15RA	rs599247	C	T	-0.0555	0.008818	3.101e-10	0.38802	35350	0.00111936	39.6115
IL15RA	rs61832754	G	A	-0.1852	0.023559	3.805e-15	0.03533	35377	0.00174377	61.7936
IL15RA	rs61834543	A	G	-0.1644	0.024565	2.196e-11	0.03199	35357	0.00126516	44.7863
IL15RA	rs61843062	T	C	0.1769	0.027852	2.132e-10	0.02372	35347	0.00113997	40.3384
IL15RA	rs61856128	A	C	-0.0529	0.009521	2.761e-08	0.29125	35371	0.000872007	30.8689
IL15RA	rs62626316	A	G	-0.1733	0.024552	1.682e-12	0.03006	35359	0.00140706	49.8194
IL15RA	rs641034	G	A	-0.2134	0.014815	4.827e-47	0.09234	35358	0.00583387	207.473
IL15RA	rs6602322	A	G	-0.1085	0.008583	1.261e-36	0.48936	35358	0.0044992	159.793
IL15RA	rs6602360	A	G	-0.1875	0.008779	3.289e-101	0.3799	35358	0.0127367	456.129
IL15RA	rs687805	T	C	0.1658	0.009425	2.876e-69	0.29849	35357	0.00867653	309.444
IL15RA	rs7071157	C	T	-0.0546	0.008789	5.218e-10	0.4014	35343	0.00109076	38.5906
IL15RA	rs7074607	A	G	-0.0912	0.011495	2.129e-15	0.16541	35374	0.0017763	62.943
IL15RA	rs7083321	T	G	-0.0679	0.010061	1.491e-11	0.24118	35350	0.00128679	45.5442
IL15RA	rs72776098	A	G	-0.1842	0.030199	1.064e-09	0.0206	35359	0.00105108	37.2023
IL15RA	rs73606764	A	G	-0.1244	0.01879	3.576e-11	0.05457	35372	0.00123763	43.8291
IL15RA	rs74679113	A	G	0.1174	0.020781	1.61e-08	0.04425	35362	0.000901726	31.9138
IL15RA	rs74934234	T	C	-0.2458	0.021952	4.217e-29	0.03926	35356	0.00353358	125.369
IL15RA	rs76323240	CTT	CTC	-0.3514	0.038509	7.161e-20	0.01227	35355	0.00234967	83.2635
IL15RA	rs76324734	A	G	0.1259	0.018273	5.579e-12	0.05932	35373	0.00134022	47.4687
IL15RA	rs77448812	A	G	-0.1886	0.023887	2.891e-15	0.03472	35347	0.00176053	62.3355
IL15RA	rs78419161	A	G	0.1388	0.013023	1.604e-26	0.12347	35355	0.00320268	113.588
IL15RA	rs79036644	C	G	-0.2949	0.039782	1.235e-13	0.01147	35359	0.00155168	54.948
IL15RA	rs79046049	A	G	0.2392	0.034813	6.374e-12	0.01573	35351	0.0013337	47.2079
IL15RA	rs79070484	A	G	0.1833	0.023386	4.578e-15	0.0349	35373	0.00173375	61.4311
IL15RA	rs7911111	C	G	0.0859	0.008865	3.334e-22	0.38925	35351	0.00264896	93.8867
IL15RA	rs7914655	T	C	-0.3358	0.013969	1.103e-127	0.10493	35359	0.0160802	577.838
IL15RA	rs79203718	C	T	-0.116	0.01902	1.068e-09	0.05473	35372	0.00105046	37.1938
IL15RA	rs79226963	T	C	0.262	0.022172	3.206e-32	0.03906	35351	0.00393441	139.627
IL15RA	rs8177628	T	C	-0.257	0.011989	6.239e-102	0.14989	35359	0.012829	459.49
IL15RA	rs8177656	A	G	0.2988	0.014484	1.506e-94	0.09514	35359	0.0118929	425.559
IL15RA	rs8177683	T	C	0.4055	0.006683	1e-200	0.38612	35359	0.0943023	3681.41
IL15RA	rs8177751	T	A	-0.1612	0.011093	7.613e-48	0.18638	35357	0.00593705	211.158
IL15RA	rs8177770	T	G	0.3305	0.025004	6.925e-40	0.02979	35359	0.00491681	174.703
IL15RA	rs8177779	A	G	0.4285	0.017633	1.892e-130	0.06282	35359	0.0164269	590.506
IL15RA	rs9423444	T	C	-0.0504	0.008842	1.197e-08	0.37495	35372	0.000917702	32.4889
IL18R1	rs10175179	C	T	-0.1028	0.008396	1.813e-34	0.37067	35363	0.00422139	149.905
IL18R1	rs10439410	T	G	-0.3525	0.006049	1e-200	0.4781	35367	0.0876063	3395.68
IL18R1	rs111231148	C	G	-0.2237	0.03561	3.344e-10	0.01372	35363	0.00111469	39.4606
IL18R1	rs11123950	T	C	0.0821	0.013188	4.802e-10	0.1086	35364	0.00109469	38.7529
IL18R1	rs112254084	A	C	0.5682	0.032254	1.842e-69	0.01615	35365	0.00869896	310.321
IL18R1	rs112447248	A	T	-0.1341	0.022047	1.183e-09	0.0339	35368	0.00104495	36.9942
IL18R1	rs11274150	TGTATAGGATTTGAGAATTT	T	-0.1341	0.015089	6.276e-19	0.07716	35365	0.0022284	78.9791
IL18R1	rs113081247	T	C	-0.3327	0.039408	3.107e-17	0.01085	35368	0.00201118	71.2709
IL18R1	rs113392149	G	A	0.3382	0.028553	2.292e-32	0.02119	35363	0.00395162	140.288
IL18R1	rs114003263	A	G	0.6474	0.033111	3.915e-85	0.01483	35367	0.0106938	382.275
IL18R1	rs11465724	T	C	-0.3389	0.023784	4.543e-46	0.03063	35366	0.00570823	203.025
IL18R1	rs115540952	TATA	CATA	-0.2124	0.038116	2.512e-08	0.01138	35366	0.000877258	31.0506
IL18R1	rs115634497	C	T	0.2334	0.016906	2.342e-43	0.06058	35363	0.00536088	190.588
IL18R1	rs115860741	A	G	0.2446	0.026197	9.921e-21	0.02412	35367	0.00245891	87.1736
IL18R1	rs115932256	A	G	-0.348	0.036042	4.662e-22	0.01286	35366	0.00262913	93.2215
IL18R1	rs116008574	TCTCAATTTAAAAAAAAAAC	TCTCAATTAAAAAAAAAAAC	0.111	0.02034	4.833e-08	0.04243	35368	0.000841333	29.7796
IL18R1	rs116287156	C	T	-0.0572	0.009099	3.249e-10	0.27048	35368	0.00111612	39.5167
IL18R1	rs12712095	C	T	0.069	0.008157	2.705e-17	0.45563	35368	0.00201906	71.5505
IL18R1	rs12712113	T	C	0.1186	0.018002	4.448e-11	0.05653	35368	0.0012257	43.4014
IL18R1	rs13016771	A	G	-0.4447	0.016507	7.588e-160	0.06324	35366	0.020109	725.727
IL18R1	rs13019803	T	C	-0.1773	0.017478	3.518e-24	0.05779	35365	0.00290134	102.899
IL18R1	rs13031110	C	A	0.1306	0.013455	2.835e-22	0.10056	35361	0.00265729	94.2094
IL18R1	rs140330695	A	G	-0.1636	0.029412	2.663e-08	0.01958	35368	0.000874032	30.938
IL18R1	rs140879872	C	T	-0.242	0.028872	5.214e-17	0.01897	35366	0.00198257	70.251
IL18R1	rs144424122	G	A	-0.221	0.02771	1.518e-15	0.02201	35368	0.00179523	63.6044
IL18R1	rs144641193	TA	TC	-0.089	0.012301	4.648e-13	0.12441	35366	0.00147799	52.3449
IL18R1	rs147167107	A	C	-0.2038	0.036982	3.571e-08	0.01173	35363	0.000858036	30.3671
IL18R1	rs148378006	T	C	0.5939	0.024659	3.663e-128	0.02763	35366	0.0161371	580.031
IL18R1	rs150279884	G	A	0.4576	0.023521	2.667e-84	0.03033	35368	0.0105883	378.474
IL18R1	rs1509498	G	A	0.08	0.011123	6.371e-13	0.16268	35367	0.00146051	51.7263
IL18R1	rs183542099	TCCACCTC	TCCATCTC	0.1792	0.02112	2.162e-17	0.03746	35368	0.0020314	71.9886
IL18R1	rs183611009	G	A	-0.4492	0.029779	2.053e-51	0.01918	35364	0.00639311	227.528
IL18R1	rs183775293	CATATAGGGGGG	CATATAGGGGGA	0.2211	0.033688	5.265e-11	0.01456	35368	0.00121643	43.0727
IL18R1	rs188840549	T	C	-0.1056	0.018256	7.273e-09	0.05027	35363	0.000945272	33.4574
IL18R1	rs1921622	A	G	-0.4124	0.006084	1e-200	0.41827	35367	0.114978	4594.46
IL18R1	rs2241132	A	C	-0.1846	0.012864	1.06e-46	0.10975	35363	0.00578949	205.914
IL18R1	rs2310318	A	T	-0.0601	0.010961	4.184e-08	0.16523	35366	0.000849364	30.0624
IL18R1	rs2732865	A	C	0.2059	0.021274	3.728e-22	0.03682	35366	0.00264168	93.6677
IL18R1	rs34058323	G	A	-0.0842	0.00941	3.626e-19	0.24911	35366	0.0022588	80.0609
IL18R1	rs34173109	G	A	-0.2278	0.032917	4.501e-12	0.01544	35368	0.00135229	47.8897
IL18R1	rs35789178	G	T	0.1487	0.010173	2.189e-48	0.19366	35368	0.00600479	213.648
IL18R1	rs36036501	G	T	-0.1609	0.014758	1.118e-27	0.08231	35362	0.00335014	118.859
IL18R1	rs369489990	ATT	A	-0.1152	0.008597	6.075e-41	0.34245	35365	0.0050517	179.55
IL18R1	rs3917279	G	T	0.0919	0.009049	3.136e-24	0.27629	35364	0.00290806	103.135
IL18R1	rs4070569	C	T	-0.0874	0.008134	6.242e-27	0.49605	35363	0.00325424	115.449
[truncated: 10,778 more rows]

## Sheet: Sheet4
Table S3. Association of the protein with type 2 diabetes: Mendelian randomization analysis results
Protein	Method	SNP	β	P-Value	OR	or_lci95	or_uci95
SIGLEC12	MR Egger	136	-0.0150986	0.0509716	0.985015	0.970324	0.999928
SIGLEC12	Weighted median	136	-0.0130931	0.0848014	0.986992	0.972405	1.0018
SIGLEC12	Inverse variance weighted	136	-0.0110763	0.033326	0.988985	0.978947	0.999125
SIGLEC12	Simple mode	136	-0.0174505	0.320926	0.982701	0.949535	1.01703
SIGLEC12	Weighted mode	136	-0.0132491	0.0557298	0.986838	0.973648	1.00021
STAT3	MR Egger	10	0.0361705	0.668716	1.03683	0.883862	1.21628
STAT3	Weighted median	10	-0.0454658	0.210017	0.955552	0.88998	1.02596
STAT3	Inverse variance weighted	10	-0.0814002	0.00382685	0.921825	0.872349	0.974107
STAT3	Simple mode	10	-0.0692496	0.27241	0.933094	0.830813	1.04797
STAT3	Weighted mode	10	-0.057953	0.157999	0.943694	0.876585	1.01594
PCDH9	MR Egger	46	-0.0274678	0.227217	0.972906	0.931063	1.01663
PCDH9	Weighted median	46	-0.0332632	0.0300909	0.967284	0.93864	0.996801
PCDH9	Inverse variance weighted	46	-0.0390339	0.000284609	0.961718	0.941655	0.982209
PCDH9	Simple mode	46	-0.0392744	0.152766	0.961487	0.911922	1.01375
PCDH9	Weighted mode	46	-0.0305977	0.0527847	0.969866	0.941061	0.999552
APMAP	MR Egger	7	-0.126249	0.42245	0.881395	0.663918	1.17011
APMAP	Weighted median	7	-0.114067	0.0287239	0.892198	0.805507	0.988218
APMAP	Inverse variance weighted	7	-0.140435	0.0269376	0.86898	0.767323	0.984105
APMAP	Simple mode	7	-0.185429	0.0680348	0.830748	0.705384	0.978392
APMAP	Weighted mode	7	-0.125144	0.0619274	0.882369	0.792751	0.982119
PLOD3	MR Egger	9	0.0673624	0.640233	1.06968	0.816277	1.40176
PLOD3	Weighted median	9	0.193103	3.31855e-05	1.21301	1.10729	1.32882
PLOD3	Inverse variance weighted	9	0.167296	0.00963551	1.1821	1.04146	1.34174
PLOD3	Simple mode	9	0.278955	0.00648185	1.32175	1.13793	1.53525
PLOD3	Weighted mode	9	0.197425	0.00302062	1.21826	1.11089	1.33601
MSMB	MR Egger	82	-0.00300264	0.754809	0.997002	0.978453	1.0159
MSMB	Weighted median	82	-0.000222367	0.973912	0.999778	0.986541	1.01319
MSMB	Inverse variance weighted	82	-0.0138561	0.00639805	0.986239	0.976465	0.996112
MSMB	Simple mode	82	-0.014729	0.22512	0.985379	0.962379	1.00893
MSMB	Weighted mode	82	-0.00802339	0.220942	0.992009	0.979442	1.00474
GNRH2	MR Egger	7	-0.0694978	0.265733	0.932862	0.83674	1.04003
GNRH2	Weighted median	7	-0.108888	0.00225961	0.896831	0.836295	0.96175
GNRH2	Inverse variance weighted	7	-0.110249	0.000744157	0.895611	0.840031	0.95487
GNRH2	Simple mode	7	-0.1368	0.0791823	0.872144	0.768149	0.990218
GNRH2	Weighted mode	7	-0.112991	0.0196632	0.893159	0.832634	0.958084
ACE	MR Egger	93	0.0216163	0.150843	1.02185	0.992401	1.05218
ACE	Weighted median	93	0.0240923	0.013605	1.02438	1.00497	1.04418
ACE	Inverse variance weighted	93	0.023345	0.00237375	1.02362	1.00832	1.03915
ACE	Simple mode	93	0.0266148	0.182155	1.02697	0.987884	1.06761
ACE	Weighted mode	93	0.017809	0.0413692	1.01797	1.00094	1.03529
SMPD1	MR Egger	42	-0.0476503	0.0399176	0.953467	0.912447	0.996331
SMPD1	Weighted median	42	-0.0377793	0.0434131	0.962925	0.928262	0.998884
SMPD1	Inverse variance weighted	42	-0.0399604	0.0011511	0.960828	0.937954	0.984259
SMPD1	Simple mode	42	-0.0211674	0.463736	0.979055	0.925649	1.03554
SMPD1	Weighted mode	42	-0.0339847	0.0581473	0.966586	0.934112	1.00019
HHIP	MR Egger	9	0.219827	0.0688748	1.24586	1.01937	1.52267
HHIP	Weighted median	9	0.163529	5.98341e-05	1.17766	1.08727	1.27556
HHIP	Inverse variance weighted	9	0.160008	0.00167711	1.17352	1.06205	1.29669
HHIP	Simple mode	9	0.195509	0.012058	1.21593	1.0799	1.36909
HHIP	Weighted mode	9	0.182957	0.0036882	1.20076	1.099	1.31195
CD58	MR Egger	4	0.0980228	0.13803	1.10299	1.01829	1.19473
CD58	Weighted median	4	0.0824744	0.000513457	1.08597	1.03659	1.1377
CD58	Inverse variance weighted	4	0.0862102	0.000105788	1.09004	1.04355	1.13859
CD58	Simple mode	4	0.107103	0.0954918	1.11305	1.01999	1.21459
CD58	Weighted mode	4	0.0785572	0.0627451	1.08173	1.0257	1.14081
SPINK7	MR Egger	3	-0.238836	0.44061	0.787544	0.53427	1.16088
SPINK7	Weighted median	3	-0.175415	0.000146119	0.839109	0.766478	0.918623
SPINK7	Inverse variance weighted	3	-0.167891	8.56557e-05	0.845446	0.777504	0.919324
SPINK7	Simple mode	3	-0.174968	0.104206	0.839484	0.744318	0.946817
SPINK7	Weighted mode	3	-0.179654	0.0763341	0.835559	0.753556	0.926485
REG4	MR Egger	10	-0.137128	0.347658	0.871859	0.665959	1.14142
REG4	Weighted median	10	-0.0622639	0.0799522	0.939635	0.876375	1.00746
REG4	Inverse variance weighted	10	-0.105982	0.0152232	0.899441	0.825661	0.979813
REG4	Simple mode	10	-0.0445711	0.460386	0.956408	0.853972	1.07113
REG4	Weighted mode	10	-0.0445711	0.400751	0.956408	0.866213	1.05599
HSPB1	MR Egger	53	-0.0144376	0.562852	0.985666	0.938921	1.03474
HSPB1	Weighted median	53	0.0334598	0.0470035	1.03403	1.00044	1.06874
HSPB1	Inverse variance weighted	53	0.0270003	0.0420782	1.02737	1.00097	1.05447
HSPB1	Simple mode	53	0.0425143	0.185705	1.04343	0.980573	1.11032
HSPB1	Weighted mode	53	0.0338976	0.122528	1.03448	0.99161	1.0792
SVEP1	MR Egger	78	0.0268556	0.035228	1.02722	1.00231	1.05275
SVEP1	Weighted median	78	0.0421544	0.000583683	1.04306	1.0183	1.06842
SVEP1	Inverse variance weighted	78	0.0337975	1.76024e-05	1.03438	1.01854	1.05046
SVEP1	Simple mode	78	0.0182202	0.429912	1.01839	0.973572	1.06527
SVEP1	Weighted mode	78	0.0408082	0.000660083	1.04165	1.01845	1.06539
MTRF1L	MR Egger	13	-0.0871075	0.361873	0.916579	0.766	1.09676
MTRF1L	Weighted median	13	-0.084718	0.00618065	0.918771	0.864709	0.976214
MTRF1L	Inverse variance weighted	13	-0.0913348	0.0136615	0.912712	0.848804	0.981432
MTRF1L	Simple mode	13	-0.117191	0.0628512	0.889415	0.795148	0.994858
MTRF1L	Weighted mode	13	-0.0787331	0.0216877	0.924287	0.871753	0.979987
SVEP1	MR Egger	81	0.0258718	0.035044	1.02621	1.00223	1.05076
SVEP1	Weighted median	81	0.0452636	6.49564e-05	1.0463	1.02332	1.0698
SVEP1	Inverse variance weighted	81	0.0412917	1.03165e-07	1.04216	1.02643	1.05813
SVEP1	Simple mode	81	0.0431687	0.0494622	1.04411	1.00075	1.08935
SVEP1	Weighted mode	81	0.0447809	0.000110493	1.0458	1.02348	1.06861
TBCE	MR Egger	5	-0.215028	0.31473	0.806519	0.568414	1.14436
TBCE	Weighted median	5	-0.144799	0.00372861	0.865197	0.784543	0.954142
TBCE	Inverse variance weighted	5	-0.172005	3.18497e-05	0.841975	0.776429	0.913054
TBCE	Simple mode	5	-0.156134	0.0700486	0.855445	0.755199	0.968997
TBCE	Weighted mode	5	-0.145609	0.0701692	0.864496	0.76957	0.97113
TXNDC5	MR Egger	20	0.0668778	0.183911	1.06916	0.972411	1.17555
TXNDC5	Weighted median	20	0.0622611	0.0412533	1.06424	1.00247	1.12981
TXNDC5	Inverse variance weighted	20	0.076801	0.00139642	1.07983	1.03014	1.13191
TXNDC5	Simple mode	20	0.0813369	0.17025	1.08474	0.969959	1.2131
TXNDC5	Weighted mode	20	0.0525738	0.15935	1.05398	0.98238	1.1308
FGFBP3	MR Egger	27	-0.000536624	0.993572	0.999464	0.878276	1.13737
FGFBP3	Weighted median	27	-0.0890647	3.59845e-05	0.914786	0.876943	0.954263
FGFBP3	Inverse variance weighted	27	-0.112861	0.00327372	0.893275	0.828547	0.963059
FGFBP3	Simple mode	27	-0.13311	0.0127358	0.875369	0.794041	0.965027
FGFBP3	Weighted mode	27	-0.0900067	0.000284984	0.913925	0.876238	0.953233
UROS	MR Egger	15	0.108113	0.0652697	1.11417	1.00286	1.23784
UROS	Weighted median	15	0.0503122	0.118867	1.0516	0.987164	1.12024
UROS	Inverse variance weighted	15	0.0546307	0.0344185	1.05615	1.00401	1.11099
UROS	Simple mode	15	0.0453044	0.468405	1.04635	0.928826	1.17874
UROS	Weighted mode	15	0.04734	0.163472	1.04848	0.984376	1.11676
TNR	MR Egger	5	-0.183384	0.179944	0.832448	0.677216	1.02326
TNR	Weighted median	5	-0.100452	0.0124322	0.904429	0.835924	0.978547
TNR	Inverse variance weighted	5	-0.0774587	0.0273831	0.925465	0.863916	0.991399
TNR	Simple mode	5	-0.0922429	0.232295	0.911884	0.801892	1.03696
TNR	Weighted mode	5	-0.103456	0.0755874	0.901716	0.828217	0.981738
APOL1	MR Egger	34	-0.0398217	0.0434741	0.960961	0.92594	0.997306
APOL1	Weighted median	34	-0.0333418	0.0539197	0.967208	0.934965	1.00056
APOL1	Inverse variance weighted	34	-0.027547	0.0268954	0.972829	0.949382	0.996855
APOL1	Simple mode	34	-0.000829974	0.98096	0.99917	0.933814	1.0691
APOL1	Weighted mode	34	-0.0433737	0.00612807	0.957553	0.930158	0.985756
HIBCH	MR Egger	51	-0.038923	0.163317	0.961825	0.911351	1.01509
HIBCH	Weighted median	51	-0.05349	0.00242264	0.947915	0.915707	0.981256
HIBCH	Inverse variance weighted	51	-0.0556436	3.94725e-05	0.945876	0.92111	0.971308
HIBCH	Simple mode	51	-0.0750722	0.0483139	0.927677	0.862634	0.997624
HIBCH	Weighted mode	51	-0.0549552	0.0018292	0.946528	0.91606	0.978009
STAMBPL1	MR Egger	5	-0.401132	0.0880175	0.669562	0.488642	0.917467
STAMBPL1	Weighted median	5	-0.204929	0.000174205	0.814705	0.732031	0.906715
STAMBPL1	Inverse variance weighted	5	-0.180712	4.68112e-05	0.834676	0.765125	0.910549
STAMBPL1	Simple mode	5	-0.190307	0.096599	0.826705	0.69574	0.982323
STAMBPL1	Weighted mode	5	-0.224608	0.0218781	0.798829	0.707936	0.901393
LYPLAL1	MR Egger	3	-0.099024	0.607326	0.905721	0.68885	1.19087
LYPLAL1	Weighted median	3	-0.117048	0.0527356	0.889542	0.790191	1.00139
LYPLAL1	Inverse variance weighted	3	-0.119008	0.0325191	0.8878	0.796037	0.990142
LYPLAL1	Simple mode	3	-0.121247	0.241311	0.885815	0.766796	1.02331
LYPLAL1	Weighted mode	3	-0.115194	0.208459	0.891194	0.787846	1.0081
PLEKHA1	MR Egger	31	0.0713404	0.0616794	1.07395	0.999406	1.15405
PLEKHA1	Weighted median	31	0.069857	0.0005838	1.07235	1.0305	1.11591
PLEKHA1	Inverse variance weighted	31	0.0443202	0.0193055	1.04532	1.00722	1.08486
PLEKHA1	Simple mode	31	0.0408004	0.45654	1.04164	0.936866	1.15814
PLEKHA1	Weighted mode	31	0.0654962	0.00822094	1.06769	1.02034	1.11723
TAX1BP3	MR Egger	3	-0.115038	0.597091	0.891333	0.655464	1.21208
TAX1BP3	Weighted median	3	-0.202085	0.0381637	0.817025	0.67493	0.989036
TAX1BP3	Inverse variance weighted	3	-0.202475	0.0121753	0.816707	0.697139	0.956782
TAX1BP3	Simple mode	3	-0.224998	0.185281	0.798518	0.639585	0.996945
TAX1BP3	Weighted mode	3	-0.207304	0.23048	0.812772	0.64035	1.03162
HPGDS	MR Egger	65	-0.0265154	0.0240842	0.973833	0.952183	0.995975
HPGDS	Weighted median	65	-0.0191611	0.0295527	0.981021	0.964235	0.9981
HPGDS	Inverse variance weighted	65	-0.0198498	0.0154491	0.980346	0.964722	0.996223
HPGDS	Simple mode	65	-0.0314234	0.19088	0.969065	0.924953	1.01528
HPGDS	Weighted mode	65	-0.0244509	0.000857485	0.975846	0.962568	0.989306
TNFAIP8	MR Egger	19	-0.0918322	0.18355	0.912258	0.801186	1.03873
TNFAIP8	Weighted median	19	0.0687955	0.0338962	1.07122	1.00524	1.14152
TNFAIP8	Inverse variance weighted	19	0.0703866	0.0364107	1.07292	1.00446	1.14605
TNFAIP8	Simple mode	19	-0.00368006	0.954898	0.996327	0.87858	1.12985
TNFAIP8	Weighted mode	19	-0.00557773	0.88856	0.994438	0.920813	1.07395
TRDMT1	MR Egger	45	-0.0448974	0.164694	0.956096	0.89839	1.01751
TRDMT1	Weighted median	45	-0.0347522	0.0605177	0.965845	0.931424	1.00154
TRDMT1	Inverse variance weighted	45	-0.0331349	0.0391781	0.967408	0.937418	0.998358
TRDMT1	Simple mode	45	-0.039529	0.259527	0.961242	0.898205	1.0287
TRDMT1	Weighted mode	45	-0.0365469	0.0385141	0.964113	0.932277	0.997035
PTGFRN	MR Egger	102	-0.0302325	0.00447981	0.97022	0.950651	0.990192
PTGFRN	Weighted median	102	-0.0269462	0.000728114	0.973414	0.958316	0.988749
PTGFRN	Inverse variance weighted	102	-0.0201737	0.00325356	0.980028	0.966948	0.993286
PTGFRN	Simple mode	102	-0.012465	0.485207	0.987612	0.953763	1.02266
PTGFRN	Weighted mode	102	-0.0263384	0.000257762	0.974005	0.960823	0.987368
ELMO1	MR Egger	5	-0.0401706	0.848859	0.960626	0.65738	1.40376
ELMO1	Weighted median	5	-0.135818	0.00876376	0.873001	0.788693	0.966322
ELMO1	Inverse variance weighted	5	-0.134621	0.00137555	0.874047	0.804863	0.949178
ELMO1	Simple mode	5	-0.11937	0.190364	0.88748	0.764974	1.0296
ELMO1	Weighted mode	5	-0.138217	0.102187	0.87091	0.766096	0.990064
ECI2	MR Egger	45	-0.00937486	0.629315	0.990669	0.953926	1.02883
ECI2	Weighted median	45	0.02133	0.167785	1.02156	0.991061	1.053
ECI2	Inverse variance weighted	45	0.0320427	0.00267919	1.03256	1.01119	1.05439
ECI2	Simple mode	45	0.0227104	0.321293	1.02297	0.978569	1.06939
ECI2	Weighted mode	45	0.0214572	0.165324	1.02169	0.991683	1.0526
ALDH3B1	MR Egger	3	0.218917	0.552537	1.24473	0.750106	2.06551
ALDH3B1	Weighted median	3	0.198143	5.48015e-05	1.21914	1.10724	1.34234
ALDH3B1	Inverse variance weighted	3	0.197234	0.0152004	1.21803	1.03872	1.42829
ALDH3B1	Simple mode	3	0.231394	0.113968	1.26036	1.06565	1.49063
ALDH3B1	Weighted mode	3	0.199568	0.0632392	1.22088	1.10102	1.35378
CCS	MR Egger	5	-0.0237222	0.862653	0.976557	0.762895	1.25006
CCS	Weighted median	5	0.129636	0.00738601	1.13841	1.0354	1.25167
CCS	Inverse variance weighted	5	0.154515	0.000240919	1.16709	1.07469	1.26744
CCS	Simple mode	5	0.138861	0.151888	1.14896	0.984987	1.34024
CCS	Weighted mode	5	0.119081	0.0745604	1.12646	1.02197	1.24164
RSPO3	MR Egger	19	0.0719456	0.301453	1.0746	0.941414	1.22662
RSPO3	Weighted median	19	0.0466111	0.156178	1.04771	0.982344	1.11744
RSPO3	Inverse variance weighted	19	0.0988798	0.000956192	1.10393	1.04103	1.17064
RSPO3	Simple mode	19	0.198799	0.00649079	1.21994	1.07486	1.3846
RSPO3	Weighted mode	19	0.0451003	0.191791	1.04613	0.980123	1.11659
LYPD3	MR Egger	3	-0.123597	0.478211	0.883736	0.704824	1.10806
LYPD3	Weighted median	3	-0.0932287	0.0271415	0.910985	0.838676	0.989529
LYPD3	Inverse variance weighted	3	-0.088205	0.0279984	0.915573	0.846298	0.990519
LYPD3	Simple mode	3	-0.0934161	0.216695	0.910814	0.821878	1.00937
LYPD3	Weighted mode	3	-0.0933302	0.208853	0.910893	0.824211	1.00669
NEGR1	MR Egger	11	-0.0301046	0.859629	0.970344	0.701638	1.34196
NEGR1	Weighted median	11	-0.109696	0.00372179	0.896107	0.832091	0.965048
NEGR1	Inverse variance weighted	11	-0.116004	0.0165632	0.890472	0.809865	0.979102
NEGR1	Simple mode	11	-0.0453266	0.475866	0.955685	0.847677	1.07746
NEGR1	Weighted mode	11	-0.111779	0.0170399	0.894242	0.828235	0.96551
FSTL1	MR Egger	10	-0.115457	0.248448	0.890959	0.742854	1.06859
FSTL1	Weighted median	10	-0.0747578	0.0325495	0.927968	0.86649	0.993808
FSTL1	Inverse variance weighted	10	-0.0921399	0.000889313	0.911978	0.863743	0.962906
FSTL1	Simple mode	10	-0.140192	0.0360568	0.869191	0.777391	0.971832
FSTL1	Weighted mode	10	-0.0770562	0.0559149	0.925838	0.86424	0.991826
CD177	MR Egger	131	0.0111657	0.0660907	1.01123	0.999359	1.02324
CD177	Weighted median	131	0.0100256	0.0700825	1.01008	0.999178	1.02109
CD177	Inverse variance weighted	131	0.00867743	0.0169119	1.00872	1.00156	1.01592
CD177	Simple mode	131	0.0107098	0.300879	1.01077	0.990545	1.0314
CD177	Weighted mode	131	0.0107098	0.0494497	1.01077	1.00013	1.02152
FLRT2	MR Egger	42	-0.0326949	0.403314	0.967834	0.897125	1.04412
FLRT2	Weighted median	42	-0.0300409	0.158308	0.970406	0.930739	1.01176
FLRT2	Inverse variance weighted	42	-0.036261	0.0424066	0.964389	0.931201	0.998759
FLRT2	Simple mode	42	-0.0317957	0.361019	0.968704	0.905508	1.03631
FLRT2	Weighted mode	42	-0.0294168	0.123722	0.971012	0.936035	1.0073
ISLR2	MR Egger	34	0.0128411	0.772922	1.01292	0.929001	1.10443
ISLR2	Weighted median	34	0.0294618	0.203681	1.0299	0.984161	1.07777
ISLR2	Inverse variance weighted	34	0.0447489	0.0129408	1.04577	1.0095	1.08333
ISLR2	Simple mode	34	0.012005	0.795886	1.01208	0.924756	1.10764
ISLR2	Weighted mode	34	0.0282191	0.275831	1.02862	0.978539	1.08127
PXDN	MR Egger	11	-0.149618	0.0640166	0.861037	0.749338	0.989387
PXDN	Weighted median	11	-0.0844297	0.0108323	0.919036	0.861247	0.980703
PXDN	Inverse variance weighted	11	-0.068708	0.00856996	0.933599	0.886977	0.982673
PXDN	Simple mode	11	-0.085271	0.0992561	0.918263	0.837569	1.00673
PXDN	Weighted mode	11	-0.0911031	0.0115408	0.912924	0.861584	0.967322
ARHGEF25	MR Egger	5	-0.0420343	0.699043	0.958837	0.79011	1.1636
ARHGEF25	Weighted median	5	-0.121197	0.00766305	0.885859	0.810357	0.968396
ARHGEF25	Inverse variance weighted	5	-0.132047	0.000532694	0.8763	0.813209	0.944285
ARHGEF25	Simple mode	5	-0.0883005	0.291009	0.915486	0.793989	1.05557
ARHGEF25	Weighted mode	5	-0.112433	0.0835973	0.893657	0.811764	0.983812
EIF1AD	MR Egger	6	-0.0824562	0.117888	0.920852	0.84891	0.99889
EIF1AD	Weighted median	6	-0.0896976	0.00442031	0.914208	0.859452	0.972452
EIF1AD	Inverse variance weighted	6	-0.105749	0.0015334	0.89965	0.842679	0.960473
EIF1AD	Simple mode	6	-0.102235	0.146086	0.902817	0.803527	1.01438
EIF1AD	Weighted mode	6	-0.0895151	0.0460699	0.914374	0.855546	0.977248
NADK	MR Egger	7	0.0566718	0.625973	1.05831	0.85437	1.31093
NADK	Weighted median	7	-0.11287	0.00893191	0.893267	0.820797	0.972136
NADK	Inverse variance weighted	7	-0.0782394	0.0437788	0.924743	0.857017	0.997821
NADK	Simple mode	7	-0.137402	0.119527	0.871619	0.751396	1.01108
NADK	Weighted mode	7	-0.120303	0.0569931	0.886652	0.802033	0.980198
INHBB	MR Egger	23	0.0369327	0.326015	1.03762	0.965561	1.11506
INHBB	Weighted median	23	0.0532651	0.00170397	1.05471	1.02019	1.09039
INHBB	Inverse variance weighted	23	0.0595022	0.00302887	1.06131	1.02037	1.10389
INHBB	Simple mode	23	0.0592882	0.195284	1.06108	0.972673	1.15752
INHBB	Weighted mode	23	0.0501919	0.00865939	1.05147	1.01618	1.08799
IL12B	MR Egger	54	-0.0079197	0.591497	0.992112	0.963999	1.02104
IL12B	Weighted median	54	-0.0100877	0.485623	0.989963	0.962286	1.01844
IL12B	Inverse variance weighted	54	-0.0198893	0.0382024	0.980307	0.962042	0.998919
IL12B	Simple mode	54	-0.0578204	0.0427529	0.943819	0.89368	0.996772
IL12B	Weighted mode	54	-0.0121761	0.321918	0.987898	0.964597	1.01176
CCL8	MR Egger	156	-0.00956588	0.228362	0.99048	0.975243	1.00595
CCL8	Weighted median	156	-0.0149246	0.0494246	0.985186	0.970628	0.999963
CCL8	Inverse variance weighted	156	-0.0119915	0.0191904	0.98808	0.978213	0.998047
CCL8	Simple mode	156	-0.00873185	0.559669	0.991306	0.962706	1.02076
CCL8	Weighted mode	156	-0.0130385	0.0581053	0.987046	0.973921	1.00035
MCF2L	MR Egger	9	0.0603447	0.246237	1.0622	0.967415	1.16628
MCF2L	Weighted median	9	0.0626383	0.0172048	1.06464	1.01117	1.12095
MCF2L	Inverse variance weighted	9	0.0549484	0.0122137	1.05649	1.01204	1.10288
MCF2L	Simple mode	9	0.0633305	0.147384	1.06538	0.986042	1.1511
MCF2L	Weighted mode	9	0.0624925	0.0549337	1.06449	1.00798	1.12416
NUDT12	MR Egger	39	0.010254	0.756605	1.01031	0.947327	1.07747
NUDT12	Weighted median	39	0.00943129	0.596589	1.00948	0.97483	1.04535
NUDT12	Inverse variance weighted	39	0.0414202	0.0466364	1.04229	1.00062	1.0857
NUDT12	Simple mode	39	0.0337099	0.420053	1.03428	0.953761	1.12161
NUDT12	Weighted mode	39	0.0131185	0.447637	1.0132	0.979816	1.04773
IL15RA	MR Egger	89	0.00150446	0.911609	1.00151	0.975328	1.02839
IL15RA	Weighted median	89	-0.000313727	0.976251	0.999686	0.979249	1.02055
IL15RA	Inverse variance weighted	89	0.0145033	0.0437554	1.01461	1.00041	1.02901
IL15RA	Simple mode	89	0.00555415	0.750724	1.00557	0.971799	1.04051
IL15RA	Weighted mode	89	0.00146439	0.882007	1.00147	0.982341	1.02096
IL18R1	MR Egger	73	0.0183056	0.065948	1.01847	0.999095	1.03823
IL18R1	Weighted median	73	0.0103061	0.294751	1.01036	0.991067	1.03003
IL18R1	Inverse variance weighted	73	0.0178792	0.00188492	1.01804	1.00663	1.02958
IL18R1	Simple mode	73	0.0232952	0.18488	1.02357	0.989247	1.05908
IL18R1	Weighted mode	73	0.0158001	0.0615702	1.01593	0.999493	1.03263
MTHFS	MR Egger	79	0.0227967	0.180796	1.02306	0.989765	1.05747
MTHFS	Weighted median	79	0.0221519	0.12343	1.0224	0.993987	1.05162
MTHFS	Inverse variance weighted	79	0.0244033	0.0111486	1.0247	1.00557	1.0442
MTHFS	Simple mode	79	-0.000869137	0.97387	0.999131	0.948655	1.05229
MTHFS	Weighted mode	79	0.0177163	0.155863	1.01787	0.993505	1.04284
EFNB2	MR Egger	3	0.739892	0.238806	2.09571	1.18396	3.70958
EFNB2	Weighted median	3	0.292664	0.00185677	1.33999	1.11444	1.61119
EFNB2	Inverse variance weighted	3	0.280405	0.00041148	1.32367	1.13295	1.54648
EFNB2	Simple mode	3	0.31416	0.120311	1.36911	1.08197	1.73244
EFNB2	Weighted mode	3	0.321176	0.10495	1.37875	1.10449	1.7211
AMIGO2	MR Egger	7	0.310625	0.0591134	1.36428	1.06232	1.75206
AMIGO2	Weighted median	7	0.14298	0.00577774	1.15371	1.04232	1.277
AMIGO2	Inverse variance weighted	7	0.124772	0.00208449	1.13289	1.04636	1.22658
AMIGO2	Simple mode	7	0.167461	0.0677734	1.1823	1.02011	1.37027
AMIGO2	Weighted mode	7	0.157913	0.0397401	1.17106	1.04045	1.31808
ISG15	MR Egger	28	-0.0597211	0.0273357	0.942027	0.896031	0.990384
ISG15	Weighted median	28	-0.0476674	0.00357454	0.953451	0.923361	0.984521
ISG15	Inverse variance weighted	28	-0.041247	0.00767646	0.959592	0.93093	0.989137
ISG15	Simple mode	28	-0.0252646	0.49862	0.975052	0.907139	1.04805
ISG15	Weighted mode	28	-0.0408046	0.0102753	0.960017	0.93259	0.98825
PREP	MR Egger	15	-0.058608	0.301825	0.943076	0.847518	1.04941
PREP	Weighted median	15	-0.0491669	0.123497	0.952022	0.894284	1.01349
PREP	Inverse variance weighted	15	-0.0612379	0.0104251	0.940599	0.89754	0.985725
PREP	Simple mode	15	-0.0461242	0.383633	0.954923	0.863608	1.05589
PREP	Weighted mode	15	-0.0498116	0.185355	0.951409	0.887009	1.02048
CST6	MR Egger	8	-0.112893	0.05833	0.893247	0.812451	0.982077
CST6	Weighted median	8	-0.0806876	0.0198096	0.922482	0.861945	0.987271
CST6	Inverse variance weighted	8	-0.0719251	0.0159643	0.930601	0.877721	0.986666
CST6	Simple mode	8	-0.109406	0.178305	0.896366	0.776667	1.03451
CST6	Weighted mode	8	-0.089916	0.0402011	0.914008	0.852113	0.980399
SDF2	MR Egger	22	-0.136727	0.00432127	0.872208	0.802503	0.947968
SDF2	Weighted median	22	-0.0567439	0.0215409	0.944836	0.900204	0.991681
SDF2	Inverse variance weighted	22	-0.0601143	0.0011231	0.941657	0.908208	0.976338
SDF2	Simple mode	22	-0.0628713	0.128092	0.939064	0.868788	1.01503
SDF2	Weighted mode	22	-0.0606973	0.0173729	0.941108	0.898736	0.985478
BPIFB1	MR Egger	59	0.0521564	0.0449907	1.05354	1.00229	1.10741
BPIFB1	Weighted median	59	0.0423104	0.00366926	1.04322	1.01386	1.07342
BPIFB1	Inverse variance weighted	59	0.0360509	0.00237523	1.03671	1.01288	1.0611
BPIFB1	Simple mode	59	0.0457627	0.131775	1.04683	0.987172	1.11009
BPIFB1	Weighted mode	59	0.0286644	0.143607	1.02908	0.990811	1.06883
BOLA1	MR Egger	16	-0.0532684	0.0185335	0.948125	0.911679	0.986029
BOLA1	Weighted median	16	-0.0332491	0.0396299	0.967298	0.937141	0.998424
BOLA1	Inverse variance weighted	16	-0.0411821	0.00266034	0.959654	0.934216	0.985785
BOLA1	Simple mode	16	-0.000434368	0.989466	0.999566	0.938143	1.06501
BOLA1	Weighted mode	16	-0.0406778	0.00593	0.960138	0.936532	0.98434
FABP2	MR Egger	99	-0.012383	0.269604	0.987693	0.966338	1.00952
FABP2	Weighted median	99	-0.0241816	0.00316656	0.976108	0.960557	0.991912
FABP2	Inverse variance weighted	99	-0.0209189	0.000222709	0.979298	0.968482	0.990235
FABP2	Simple mode	99	0.0105498	0.529936	1.01061	0.977992	1.04431
FABP2	Weighted mode	99	-0.0247902	0.00232923	0.975515	0.960471	0.990794
FCGR3A	MR Egger	190	0.0153091	0.0129984	1.01543	1.00335	1.02765
FCGR3A	Weighted median	190	0.00969366	0.0781699	1.00974	0.998908	1.02069
FCGR3A	Inverse variance weighted	190	0.010716	0.00235489	1.01077	1.00382	1.01778
FCGR3A	Simple mode	190	0.00416447	0.706599	1.00417	0.982665	1.02615
FCGR3A	Weighted mode	190	0.00685366	0.265339	1.00688	0.994843	1.01906
GAS6	MR Egger	26	-0.0312023	0.368659	0.969279	0.906694	1.03618
GAS6	Weighted median	26	-0.0479958	0.0398316	0.953138	0.9105	0.997773
GAS6	Inverse variance weighted	26	-0.0744101	4.56945e-06	0.928291	0.899219	0.958303
GAS6	Simple mode	26	-0.0430734	0.369813	0.957841	0.873268	1.0506
GAS6	Weighted mode	26	-0.0456425	0.0593901	0.955383	0.913077	0.99965
GSTM1	MR Egger	139	-0.0132576	0.159158	0.98683	0.968881	1.00511
GSTM1	Weighted median	139	-0.0207188	0.0305341	0.979494	0.961277	0.998057
GSTM1	Inverse variance weighted	139	-0.0146811	0.0175885	0.985426	0.973555	0.997442
GSTM1	Simple mode	139	-0.0129846	0.476003	0.987099	0.952568	1.02288
GSTM1	Weighted mode	139	-0.0208054	0.00498982	0.97941	0.965513	0.993506
SORD	MR Egger	29	-0.0351356	0.363649	0.965474	0.896137	1.04018
SORD	Weighted median	29	-0.0581422	0.0304965	0.943516	0.895106	0.994544
SORD	Inverse variance weighted	29	-0.0564862	0.00575373	0.94508	0.907939	0.983739
SORD	Simple mode	29	-0.104843	0.0435735	0.900466	0.817047	0.992402
SORD	Weighted mode	29	-0.0679661	0.0116824	0.934292	0.889283	0.98158
CD8A	MR Egger	33	-0.0329187	0.229024	0.967617	0.918054	1.01986
CD8A	Weighted median	33	-0.0553414	0.00634101	0.946162	0.909301	0.984518
CD8A	Inverse variance weighted	33	-0.0322954	0.0362609	0.968221	0.93939	0.997936
CD8A	Simple mode	33	0.0351597	0.469753	1.03579	0.94267	1.1381
CD8A	Weighted mode	33	-0.0489542	0.0471185	0.952225	0.908989	0.997517
HEXB	MR Egger	17	0.0551693	0.0779296	1.05672	0.998025	1.11887
HEXB	Weighted median	17	0.0839066	8.19495e-05	1.08753	1.04305	1.1339
HEXB	Inverse variance weighted	17	0.0805816	3.36785e-07	1.08392	1.05087	1.118
HEXB	Simple mode	17	0.0574663	0.132959	1.05915	0.986412	1.13725
HEXB	Weighted mode	17	0.0778471	0.00123312	1.08096	1.03964	1.12391
VNN2	MR Egger	103	0.0118519	0.240762	1.01192	0.992197	1.03204
VNN2	Weighted median	103	0.00803563	0.363737	1.00807	0.990738	1.0257
VNN2	Inverse variance weighted	103	0.0146239	0.0229266	1.01473	1.00202	1.0276
VNN2	Simple mode	103	0.0113453	0.56612	1.01141	0.973085	1.05124
VNN2	Weighted mode	103	0.0133169	0.0790819	1.01341	0.998603	1.02843
AGRN	MR Egger	27	0.0535215	0.192947	1.05498	0.975425	1.14102
AGRN	Weighted median	27	0.0685279	0.00165552	1.07093	1.02617	1.11764
AGRN	Inverse variance weighted	27	0.0582416	0.00135127	1.05997	1.02288	1.09841
AGRN	Simple mode	27	0.0815075	0.0398272	1.08492	1.00772	1.16804
AGRN	Weighted mode	27	0.0649992	0.0109656	1.06716	1.01867	1.11796
LEFTY2	MR Egger	17	0.0369481	0.518418	1.03764	0.930017	1.15772
LEFTY2	Weighted median	17	0.0502097	0.103885	1.05149	0.989751	1.11708
LEFTY2	Inverse variance weighted	17	0.0665931	0.00309796	1.06886	1.02272	1.11708
LEFTY2	Simple mode	17	0.0766766	0.133231	1.07969	0.981841	1.1873
LEFTY2	Weighted mode	17	0.0514812	0.117964	1.05283	0.990458	1.11913
BCHE	MR Egger	50	-0.00961093	0.626135	0.990435	0.953106	1.02923
BCHE	Weighted median	50	-0.0259333	0.0395793	0.9744	0.95063	0.998764
BCHE	Inverse variance weighted	50	-0.0253041	0.0156028	0.975013	0.955219	0.995218
BCHE	Simple mode	50	-0.0169066	0.427551	0.983235	0.943342	1.02482
BCHE	Weighted mode	50	-0.0332572	0.00333226	0.96729	0.947073	0.987938
ALAD	MR Egger	35	0.0634647	0.0326832	1.06552	1.00771	1.12665
ALAD	Weighted median	35	0.0424095	0.034395	1.04332	1.00312	1.08513
ALAD	Inverse variance weighted	35	0.0465612	0.00600617	1.04766	1.01343	1.08305
ALAD	Simple mode	35	0.081242	0.035592	1.08463	1.00852	1.16649
ALAD	Weighted mode	35	0.0527772	0.00509455	1.05419	1.0184	1.09125
GSS	MR Egger	10	0.439843	0.0174355	1.55246	1.16317	2.07205
GSS	Weighted median	10	0.260505	1.61915e-08	1.29758	1.18544	1.42034
GSS	Inverse variance weighted	10	0.209746	2.25109e-06	1.23337	1.13068	1.34537
GSS	Simple mode	10	0.274082	0.0120775	1.31532	1.10802	1.56141
GSS	Weighted mode	10	0.298542	0.00162309	1.34789	1.18147	1.53776
PRSS27	MR Egger	10	-0.115523	0.117051	0.8909	0.783157	1.01347
PRSS27	Weighted median	10	-0.147811	2.04666e-06	0.862595	0.811543	0.916857
PRSS27	Inverse variance weighted	10	-0.139067	0.000167889	0.87017	0.809368	0.935539
PRSS27	Simple mode	10	-0.211413	0.00532653	0.809439	0.722547	0.906782
PRSS27	Weighted mode	10	-0.151487	0.0007767	0.859429	0.809527	0.912408
VIM	MR Egger	6	0.124304	0.461175	1.13236	0.839546	1.5273
VIM	Weighted median	6	0.135554	0.0218302	1.14517	1.0199	1.28583
VIM	Inverse variance weighted	6	0.131048	0.00480321	1.14002	1.04077	1.24874
VIM	Simple mode	6	0.101526	0.31411	1.10686	0.926492	1.32234
VIM	Weighted mode	6	0.147259	0.13192	1.15865	0.986912	1.36028
NCAN	MR Egger	9	-0.0750677	0.12998	0.927681	0.85143	1.01076
NCAN	Weighted median	9	-0.145525	2.53642e-05	0.864568	0.807953	0.92515
NCAN	Inverse variance weighted	9	-0.163169	2.92921e-06	0.849447	0.793289	0.909581
NCAN	Simple mode	9	-0.160341	0.0680127	0.851854	0.733905	0.988758
NCAN	Weighted mode	9	-0.147459	0.00658728	0.862898	0.797036	0.934203
FCRLB	MR Egger	52	0.0446587	0.0148774	1.04567	1.01001	1.08259
FCRLB	Weighted median	52	0.05521	0.000119827	1.05676	1.02745	1.08691
FCRLB	Inverse variance weighted	52	0.0488514	2.48061e-06	1.05006	1.02893	1.07163
FCRLB	Simple mode	52	0.0823972	0.0032305	1.08589	1.03061	1.14413
FCRLB	Weighted mode	52	0.0617493	6.30537e-05	1.0637	1.03458	1.09363
IL6R	MR Egger	116	-0.0221293	0.00640976	0.978114	0.962957	0.993509
IL6R	Weighted median	116	-0.0152286	0.0263154	0.984887	0.971743	0.998209
IL6R	Inverse variance weighted	116	-0.0210914	2.99044e-05	0.979129	0.96948	0.988874
IL6R	Simple mode	116	-0.0345012	0.0149895	0.966087	0.939994	0.992904
IL6R	Weighted mode	116	-0.020553	0.000349846	0.979657	0.969007	0.990424
NLGN1	MR Egger	8	-0.0133485	0.894006	0.98674	0.817433	1.19111
NLGN1	Weighted median	8	0.123665	0.003357	1.13164	1.04188	1.22913
NLGN1	Inverse variance weighted	8	0.121029	0.000308071	1.12866	1.05685	1.20535
NLGN1	Simple mode	8	0.153257	0.0395806	1.16562	1.03484	1.31294
NLGN1	Weighted mode	8	0.133327	0.0166737	1.14262	1.05102	1.24221
HSPG2	MR Egger	27	0.0658567	0.108932	1.06807	0.988277	1.15431
HSPG2	Weighted median	27	0.0882986	0.000160239	1.09231	1.04336	1.14356
HSPG2	Inverse variance weighted	27	0.0488589	0.0362208	1.05007	1.00314	1.0992
HSPG2	Simple mode	27	0.0569116	0.294545	1.05856	0.953746	1.1749
HSPG2	Weighted mode	27	0.0918919	0.00311307	1.09625	1.0373	1.15854
IGF2R	MR Egger	62	0.026078	0.114721	1.02642	0.994161	1.05973
IGF2R	Weighted median	62	0.0242258	0.0678455	1.02452	0.998224	1.05151
IGF2R	Inverse variance weighted	62	0.0196002	0.0411482	1.01979	1.00079	1.03916
IGF2R	Simple mode	62	0.0175893	0.483586	1.01774	0.969164	1.06876
IGF2R	Weighted mode	62	0.0215821	0.0803156	1.02182	0.997799	1.04641
MYOC	MR Egger	50	0.000111902	0.995444	1.00011	0.962621	1.03906
MYOC	Weighted median	50	-0.0158839	0.321319	0.984242	0.953825	1.01563
MYOC	Inverse variance weighted	50	-0.0249976	0.0192596	0.975312	0.955107	0.995945
MYOC	Simple mode	50	-0.0457413	0.160069	0.955289	0.897098	1.01725
MYOC	Weighted mode	50	-0.000333389	0.9838	0.999667	0.968166	1.03219
FAIM	MR Egger	31	-0.00427113	0.872515	0.995738	0.945557	1.04858
FAIM	Weighted median	31	0.00552007	0.775632	1.00554	0.96808	1.04444
FAIM	Inverse variance weighted	31	-0.0485091	0.0159525	0.952649	0.915797	0.990983
FAIM	Simple mode	31	-0.0476156	0.229503	0.9535	0.883645	1.02888
FAIM	Weighted mode	31	-0.0191775	0.269883	0.981005	0.948745	1.01436
ENO3	MR Egger	29	0.0321141	0.290656	1.03264	0.974057	1.09474
ENO3	Weighted median	29	0.0454527	0.0164082	1.0465	1.00836	1.08608
ENO3	Inverse variance weighted	29	0.0615702	4.38482e-05	1.06351	1.03256	1.09538
ENO3	Simple mode	29	0.0645373	0.127278	1.06667	0.984177	1.15607
ENO3	Weighted mode	29	0.0445776	0.0128603	1.04559	1.01177	1.08053
PDE5A	MR Egger	27	-0.0409412	0.430021	0.959886	0.868509	1.06088
PDE5A	Weighted median	27	-0.0500129	0.0675028	0.951217	0.901561	1.00361
PDE5A	Inverse variance weighted	27	-0.0558318	0.00604569	0.945698	0.908743	0.984156
PDE5A	Simple mode	27	-0.0219393	0.644837	0.9783	0.89213	1.07279
PDE5A	Weighted mode	27	-0.0452306	0.0928062	0.955777	0.908432	1.00559
NME4	MR Egger	12	0.115382	0.128706	1.1223	0.979047	1.28652
NME4	Weighted median	12	0.11291	0.0015164	1.11953	1.04408	1.20044
NME4	Inverse variance weighted	12	0.105045	0.00117502	1.11076	1.04247	1.18352
NME4	Simple mode	12	0.133825	0.0587215	1.14319	1.00947	1.29462
NME4	Weighted mode	12	0.117455	0.0104983	1.12463	1.0436	1.21195
ATXN3	MR Egger	31	-0.141838	0.00190698	0.867762	0.79991	0.941369
ATXN3	Weighted median	31	-0.105751	9.79973e-07	0.899649	0.862354	0.938556
ATXN3	Inverse variance weighted	31	-0.0571047	0.00952797	0.944495	0.904587	0.986165
ATXN3	Simple mode	31	-0.0982623	0.00433082	0.906411	0.851581	0.964772
ATXN3	Weighted mode	31	-0.105004	1.65857e-05	0.900321	0.864851	0.937246
CFHR3	MR Egger	4	-0.193036	0.292682	0.824453	0.631025	1.07717
CFHR3	Weighted median	4	-0.113606	0.0334197	0.89261	0.803891	0.99112
CFHR3	Inverse variance weighted	4	-0.0965873	0.0487783	0.907931	0.824763	0.999484
CFHR3	Simple mode	4	-0.133446	0.222344	0.875075	0.737981	1.03764
CFHR3	Weighted mode	4	-0.118322	0.148007	0.88841	0.788212	1.00135
GSTZ1	MR Egger	183	0.00109612	0.852296	1.0011	0.989628	1.0127
GSTZ1	Weighted median	183	0.00927824	0.060273	1.00932	0.999599	1.01914
GSTZ1	Inverse variance weighted	183	0.00873896	0.0133666	1.00878	1.00182	1.01579
GSTZ1	Simple mode	183	0.0171689	0.0526681	1.01732	0.999915	1.03502
GSTZ1	Weighted mode	183	0.00939268	0.0481278	1.00944	1.00014	1.01882
ADAMTSL1	MR Egger	54	-0.0379169	0.135309	0.962793	0.916764	1.01113
ADAMTSL1	Weighted median	54	-0.0352243	0.0376165	0.965389	0.933857	0.997986
ADAMTSL1	Inverse variance weighted	54	-0.0306267	0.0221213	0.969838	0.944727	0.995616
ADAMTSL1	Simple mode	54	0.0171086	0.611393	1.01726	0.952659	1.08623
ADAMTSL1	Weighted mode	54	-0.0332871	0.0950225	0.967261	0.930839	1.00511
SEMA4A	MR Egger	10	0.0602743	0.473996	1.06213	0.907582	1.24299
SEMA4A	Weighted median	10	0.0787158	0.0252188	1.0819	1.00983	1.15911
SEMA4A	Inverse variance weighted	10	0.106339	0.00153556	1.1122	1.04138	1.18784
SEMA4A	Simple mode	10	0.183696	0.0341282	1.20165	1.04019	1.38817
SEMA4A	Weighted mode	10	0.0632509	0.150706	1.06529	0.984444	1.15278
DBI	MR Egger	22	0.000188227	0.996888	1.00019	0.910991	1.09812
DBI	Weighted median	22	0.0369302	0.245554	1.03762	0.974916	1.10436
DBI	Inverse variance weighted	22	0.0974345	0.00104269	1.10234	1.03997	1.16845
DBI	Simple mode	22	0.0566256	0.434573	1.05826	0.920635	1.21646
DBI	Weighted mode	22	0.0240341	0.47834	1.02433	0.959615	1.0934
GSTA1	MR Egger	44	0.0420768	0.0423929	1.04297	1.00268	1.08488
GSTA1	Weighted median	44	0.0403228	0.0200792	1.04115	1.00635	1.07715
GSTA1	Inverse variance weighted	44	0.0373092	0.00157608	1.03801	1.01427	1.06231
GSTA1	Simple mode	44	0.0394286	0.23989	1.04022	0.974904	1.1099
GSTA1	Weighted mode	44	0.0409072	0.0168524	1.04176	1.0087	1.07589
ANXA4	MR Egger	27	0.0552176	0.168335	1.05677	0.979152	1.14054
ANXA4	Weighted median	27	0.0324467	0.154893	1.03298	0.987813	1.08021
ANXA4	Inverse variance weighted	27	0.0551713	0.00694667	1.05672	1.01523	1.09991
ANXA4	Simple mode	27	0.0366267	0.415871	1.03731	0.95104	1.1314
ANXA4	Weighted mode	27	0.0346023	0.134956	1.03521	0.990688	1.08173
KREMEN1	MR Egger	19	0.11113	0.0981403	1.11754	0.986755	1.26566
KREMEN1	Weighted median	19	0.085637	0.00157287	1.08941	1.03307	1.14882
KREMEN1	Inverse variance weighted	19	0.0671061	0.0396023	1.06941	1.0032	1.13999
KREMEN1	Simple mode	19	-0.00542601	0.911407	0.994589	0.905132	1.09289
KREMEN1	Weighted mode	19	0.0718424	0.0113271	1.07449	1.02216	1.12949
SFRP4	MR Egger	7	-0.00928297	0.873296	0.99076	0.888967	1.10421
SFRP4	Weighted median	7	-0.0244678	0.433863	0.975829	0.917827	1.0375
SFRP4	Inverse variance weighted	7	-0.0611487	0.0410289	0.940683	0.887092	0.997512
SFRP4	Simple mode	7	-0.157857	0.0679979	0.853972	0.742976	0.981551
SFRP4	Weighted mode	7	-0.00317222	0.927241	0.996833	0.933822	1.0641
MX1	MR Egger	41	0.0580955	0.134107	1.05982	0.983801	1.1417
MX1	Weighted median	41	0.0740885	0.000340652	1.0769	1.03412	1.12145
MX1	Inverse variance weighted	41	0.0751468	4.86185e-05	1.07804	1.03965	1.11785
MX1	Simple mode	41	0.0167792	0.714413	1.01692	0.930106	1.11184
MX1	Weighted mode	41	0.0629895	0.0156485	1.06502	1.01419	1.11839
CD46	MR Egger	15	-0.101158	0.100297	0.90379	0.807975	1.01097
CD46	Weighted median	15	-0.0639521	0.00581855	0.93805	0.896369	0.981669
CD46	Inverse variance weighted	15	-0.056103	0.00375042	0.945442	0.910245	0.981999
CD46	Simple mode	15	-0.103724	0.021061	0.901474	0.83362	0.974851
CD46	Weighted mode	15	-0.0639168	0.0171055	0.938083	0.89562	0.982559
UGT1A1	MR Egger	17	-0.0353986	0.628424	0.965221	0.83876	1.11075
UGT1A1	Weighted median	17	-0.0847217	0.00170344	0.918768	0.871407	0.968703
UGT1A1	Inverse variance weighted	17	-0.0883236	0.00376067	0.915465	0.862372	0.971826
UGT1A1	Simple mode	17	-0.0791367	0.171627	0.923914	0.829016	1.02967
UGT1A1	Weighted mode	17	-0.0856515	0.0067263	0.917914	0.869691	0.968811
WWOX	MR Egger	3	0.354667	0.526295	1.42571	0.670043	3.0336
WWOX	Weighted median	3	0.3469	1.2999e-05	1.41467	1.21041	1.65341
WWOX	Inverse variance weighted	3	0.348893	1.37251e-07	1.4175	1.24496	1.61394
WWOX	Simple mode	3	0.336144	0.0811842	1.39954	1.14571	1.70961
WWOX	Weighted mode	3	0.345002	0.0730249	1.41199	1.16359	1.71343
SNUPN	MR Egger	7	-0.126633	0.333615	0.881057	0.698626	1.11113
SNUPN	Weighted median	7	-0.139914	0.000343425	0.869433	0.805323	0.938647
SNUPN	Inverse variance weighted	7	-0.181964	0.000310191	0.833631	0.755141	0.92028
SNUPN	Simple mode	7	-0.145763	0.0404966	0.864363	0.774516	0.964632
SNUPN	Weighted mode	7	-0.159588	0.00745939	0.852495	0.787735	0.922579
LDLRAP1	MR Egger	4	0.195819	0.158595	1.21631	1.02175	1.44792
LDLRAP1	Weighted median	4	0.0992336	0.0769886	1.10432	0.989308	1.23271
LDLRAP1	Inverse variance weighted	4	0.125193	0.00482135	1.13337	1.03888	1.23645
LDLRAP1	Simple mode	4	0.089235	0.334478	1.09334	0.938739	1.2734
LDLRAP1	Weighted mode	4	0.0881804	0.301355	1.09219	0.950675	1.25476
PSAT1	MR Egger	5	-0.0933611	0.424087	0.910865	0.747055	1.11059
PSAT1	Weighted median	5	-0.0914728	0.0281651	0.912586	0.841009	0.990255
PSAT1	Inverse variance weighted	5	-0.0859795	0.0172618	0.917613	0.854914	0.98491
PSAT1	Simple mode	5	-0.097061	0.163966	0.907501	0.81153	1.01482
PSAT1	Weighted mode	5	-0.101449	0.10551	0.903527	0.821314	0.993969
ALDH2	MR Egger	6	0.0318136	0.716102	1.03233	0.879956	1.21108
ALDH2	Weighted median	6	0.0750234	0.157719	1.07791	0.971359	1.19615
ALDH2	Inverse variance weighted	6	0.0881423	0.034165	1.09214	1.0066	1.18495
ALDH2	Simple mode	6	0.0674397	0.418589	1.06977	0.920741	1.24291
ALDH2	Weighted mode	6	0.0558113	0.415556	1.0574	0.934752	1.19614
ALKBH3	MR Egger	30	0.0148503	0.677686	1.01496	0.947006	1.08779
ALKBH3	Weighted median	30	0.0278549	0.150406	1.02825	0.989942	1.06803
ALKBH3	Inverse variance weighted	30	0.0470122	0.00354711	1.04813	1.01553	1.08179
ALKBH3	Simple mode	30	0.0189711	0.53743	1.01915	0.960207	1.08172
ALKBH3	Weighted mode	30	0.0331227	0.0767753	1.03368	0.997747	1.0709
ARF4	MR Egger	4	-0.628712	0.34609	0.533278	0.194589	1.46147
ARF4	Weighted median	4	0.173729	0.0121197	1.18973	1.03873	1.36269
ARF4	Inverse variance weighted	4	0.173822	0.0073224	1.18984	1.0479	1.35102
ARF4	Simple mode	4	0.237777	0.0953039	1.26843	1.04512	1.53945
ARF4	Weighted mode	4	0.163075	0.140731	1.17712	1.00243	1.38226
PRSS3	MR Egger	54	-0.0102271	0.680134	0.989825	0.943108	1.03886
PRSS3	Weighted median	54	0.0483209	0.00032974	1.04951	1.02219	1.07756
PRSS3	Inverse variance weighted	54	0.0324446	0.0155966	1.03298	1.00617	1.0605
PRSS3	Simple mode	54	0.0404728	0.0785006	1.0413	0.996265	1.08838
PRSS3	Weighted mode	54	0.0484318	0.0225017	1.04962	1.00808	1.09288
GSTM4	MR Egger	137	-0.00905867	0.358575	0.990982	0.972066	1.01027
GSTM4	Weighted median	137	-0.0209832	0.0285443	0.979235	0.961015	0.997801
GSTM4	Inverse variance weighted	137	-0.0149491	0.0202569	0.985162	0.972807	0.997675
GSTM4	Simple mode	137	-0.0116981	0.535019	0.98837	0.952597	1.02549
GSTM4	Weighted mode	137	-0.0239765	0.00389097	0.976309	0.960812	0.992055
SLIT2	MR Egger	7	0.177543	0.321786	1.19428	0.870185	1.63908
SLIT2	Weighted median	7	0.0991232	0.0107498	1.1042	1.02322	1.19159
SLIT2	Inverse variance weighted	7	0.0785905	0.012716	1.08176	1.01691	1.15075
SLIT2	Simple mode	7	0.106838	0.133198	1.11275	0.986327	1.25539
SLIT2	Weighted mode	7	0.108911	0.0818007	1.11506	1.00671	1.23508
PPP1R14A	MR Egger	15	-0.00333387	0.962727	0.996672	0.868929	1.14319
PPP1R14A	Weighted median	15	0.0512275	0.0940119	1.05256	0.991308	1.1176
PPP1R14A	Inverse variance weighted	15	0.0798708	0.0236431	1.08315	1.01075	1.16073
PPP1R14A	Simple mode	15	0.230995	0.0209244	1.25985	1.0586	1.49937
PPP1R14A	Weighted mode	15	0.0433233	0.174754	1.04428	0.984057	1.10818
MPPED2	MR Egger	4	-0.154589	0.452492	0.856767	0.61752	1.18871
MPPED2	Weighted median	4	-0.145732	0.00493376	0.864389	0.78088	0.956829
MPPED2	Inverse variance weighted	4	-0.176347	0.011271	0.838327	0.731442	0.960832
MPPED2	Simple mode	4	-0.0885451	0.362416	0.915262	0.778421	1.07616
MPPED2	Weighted mode	4	-0.14793	0.0771551	0.862491	0.773025	0.962312
DTD1	MR Egger	13	-0.0913618	0.156899	0.912687	0.811212	1.02686
DTD1	Weighted median	13	-0.073386	0.0154381	0.929242	0.875662	0.986101
DTD1	Inverse variance weighted	13	-0.0558011	0.0265789	0.945727	0.900217	0.993538
DTD1	Simple mode	13	-0.0797719	0.144466	0.923327	0.835332	1.02059
DTD1	Weighted mode	13	-0.0760043	0.029962	0.926812	0.872383	0.984637
SRGN	MR Egger	17	0.119679	0.135103	1.12713	0.97157	1.30761
SRGN	Weighted median	17	0.102886	0.00257829	1.10836	1.03663	1.18506
SRGN	Inverse variance weighted	17	0.0922907	0.0167323	1.09668	1.01682	1.18281
SRGN	Simple mode	17	0.127018	0.0542816	1.13544	1.00717	1.28004
SRGN	Weighted mode	17	0.108878	0.00877335	1.11503	1.03806	1.1977
HAGH	MR Egger	8	-0.00663073	0.910053	0.993391	0.889645	1.10924
HAGH	Weighted median	8	0.0807062	0.0311178	1.08405	1.00735	1.1666
HAGH	Inverse variance weighted	8	0.0843878	0.00832986	1.08805	1.02194	1.15844
HAGH	Simple mode	8	0.171633	0.0503433	1.18724	1.02952	1.36913
HAGH	Weighted mode	8	0.0593007	0.174011	1.06109	0.982639	1.14581
GSR	MR Egger	7	0.00346436	0.978503	1.00347	0.789537	1.27537
GSR	Weighted median	7	0.0684862	0.161593	1.07089	0.97296	1.17867
GSR	Inverse variance weighted	7	0.113434	0.0133326	1.12012	1.02388	1.22541
GSR	Simple mode	7	0.0766186	0.294579	1.07963	0.947275	1.23048
GSR	Weighted mode	7	0.0952028	0.114829	1.09988	0.993999	1.21704
VPS26A	MR Egger	7	-0.329719	0.0140864	0.719126	0.603709	0.856608
VPS26A	Weighted median	7	-0.165369	3.41161e-06	0.847581	0.790446	0.908845
VPS26A	Inverse variance weighted	7	-0.157806	0.00462776	0.854015	0.765652	0.952577
VPS26A	Simple mode	7	0.0791284	0.536933	1.08234	0.854055	1.37165
VPS26A	Weighted mode	7	-0.183005	0.00259234	0.832764	0.774491	0.895421
MATN3	MR Egger	139	-0.00792542	0.353696	0.992106	0.975683	1.00881
MATN3	Weighted median	139	-0.0115967	0.144516	0.98847	0.973192	1.00399
MATN3	Inverse variance weighted	139	-0.018894	0.000310286	0.981283	0.971259	0.991411
MATN3	Simple mode	139	-0.00745119	0.636977	0.992577	0.962397	1.0237
MATN3	Weighted mode	139	-0.0122319	0.108519	0.987843	0.97329	1.00261
OLFM2	MR Egger	85	-0.000887735	0.940692	0.999113	0.976087	1.02268
OLFM2	Weighted median	85	-0.0122189	0.25689	0.987855	0.967207	1.00894
OLFM2	Inverse variance weighted	85	-0.0151606	0.0327834	0.984954	0.971339	0.99876
OLFM2	Simple mode	85	-0.0367087	0.113726	0.963957	0.921526	1.00834
OLFM2	Weighted mode	85	-0.0122806	0.168339	0.987795	0.970831	1.00505
APOE	MR Egger	34	0.123438	0.0422629	1.13138	1.00912	1.26846
APOE	Weighted median	34	0.108166	1.06362e-06	1.11423	1.06686	1.16371
APOE	Inverse variance weighted	34	0.138364	3.03671e-08	1.14839	1.09352	1.20602
APOE	Simple mode	34	0.144534	0.00929172	1.1555	1.0429	1.28026
APOE	Weighted mode	34	0.10536	0.000812472	1.11111	1.05057	1.17514
CFI	MR Egger	16	-0.0790186	0.43657	0.924023	0.761552	1.12115
CFI	Weighted median	16	-0.0698302	0.0428721	0.932552	0.871604	0.997763
CFI	Inverse variance weighted	16	-0.0645616	0.0163389	0.937478	0.889354	0.988206
CFI	Simple mode	16	-0.025823	0.684608	0.974508	0.86241	1.10118
CFI	Weighted mode	16	-0.0935472	0.0355474	0.910695	0.841197	0.985935
MPO	MR Egger	47	0.02983	0.0837469	1.03028	0.996776	1.06491
MPO	Weighted median	47	0.0228676	0.0935083	1.02313	0.996151	1.05084
MPO	Inverse variance weighted	47	0.0319227	0.0033375	1.03244	1.01066	1.05468
MPO	Simple mode	47	0.0417501	0.143123	1.04263	0.986907	1.10151
MPO	Weighted mode	47	0.0156751	0.228242	1.0158	0.990561	1.04168
MRC1	MR Egger	109	-0.0146992	0.159037	0.985408	0.965592	1.00563
MRC1	Weighted median	109	-0.0354947	0.00151975	0.965128	0.944183	0.986537
MRC1	Inverse variance weighted	109	-0.0199389	0.00181821	0.980259	0.968051	0.992621
MRC1	Simple mode	109	-0.0376354	0.0791732	0.963064	0.923802	1.004
MRC1	Weighted mode	109	-0.0279469	0.00424568	0.97244	0.954376	0.990846
PRKCA	MR Egger	3	0.545806	0.298094	1.726	1.00476	2.96495
PRKCA	Weighted median	3	0.18868	0.00792562	1.20765	1.05064	1.38813
PRKCA	Inverse variance weighted	3	0.172879	0.00817946	1.18872	1.04577	1.35122
PRKCA	Simple mode	3	0.232181	0.122901	1.26135	1.05756	1.5044
PRKCA	Weighted mode	3	0.210661	0.129066	1.23449	1.047	1.45556
PLAUR	MR Egger	15	-0.0821956	0.0751127	0.921092	0.847492	1.00108
PLAUR	Weighted median	15	-0.0706422	0.0250592	0.931795	0.875955	0.991195
PLAUR	Inverse variance weighted	15	-0.0557723	0.0143206	0.945754	0.90447	0.988923
PLAUR	Simple mode	15	-0.0643249	0.162744	0.9377	0.860804	1.02147
PLAUR	Weighted mode	15	-0.0735143	0.0470927	0.929123	0.869616	0.992702
SPINT2	MR Egger	83	0.0189762	0.158496	1.01916	0.99287	1.04614
SPINT2	Weighted median	83	0.00323032	0.753323	1.00324	0.983226	1.02365
SPINT2	Inverse variance weighted	83	0.0199893	0.015055	1.02019	1.00388	1.03677
SPINT2	Simple mode	83	0.00486193	0.830751	1.00487	0.961193	1.05054
SPINT2	Weighted mode	83	0.00486193	0.662691	1.00487	0.983237	1.02699
TIE1	MR Egger	25	0.0128111	0.734913	1.01289	0.941338	1.08989
TIE1	Weighted median	25	0.0294039	0.233172	1.02984	0.981243	1.08085
TIE1	Inverse variance weighted	25	0.0474882	0.0038509	1.04863	1.0154	1.08295
TIE1	Simple mode	25	0.0676975	0.103849	1.07004	0.989273	1.1574
TIE1	Weighted mode	25	0.0370705	0.179645	1.03777	0.984622	1.09378
C5	MR Egger	11	0.0268192	0.721878	1.02718	0.890216	1.18522
C5	Weighted median	11	-0.0568393	0.174155	0.944746	0.870388	1.02546
C5	Inverse variance weighted	11	-0.0672472	0.041652	0.934964	0.876382	0.997462
C5	Simple mode	11	-0.0242304	0.74938	0.976061	0.84464	1.12793
C5	Weighted mode	11	-0.0436215	0.385701	0.957316	0.871205	1.05194
MAPK3	MR Egger	20	-0.0329801	0.707258	0.967558	0.816772	1.14618
MAPK3	Weighted median	20	-0.0977385	0.00161806	0.906886	0.853421	0.963701
MAPK3	Inverse variance weighted	20	-0.0679114	0.00216504	0.934343	0.894656	0.975792
MAPK3	Simple mode	20	-0.10927	0.0419069	0.896488	0.81266	0.988963
MAPK3	Weighted mode	20	-0.0994453	0.0206505	0.905339	0.838066	0.978013
CXCL5	MR Egger	6	0.0155334	0.862632	1.01565	0.861117	1.19793
CXCL5	Weighted median	6	0.0743698	0.112726	1.07721	0.982619	1.1809
CXCL5	Inverse variance weighted	6	0.0928669	0.0159893	1.09732	1.01746	1.18343
CXCL5	Simple mode	6	0.0532371	0.539861	1.05468	0.899929	1.23604
CXCL5	Weighted mode	6	0.0663722	0.246622	1.06862	0.967727	1.18004
CXCL1	MR Egger	75	-0.0227899	0.0891017	0.977468	0.952455	1.00314
CXCL1	Weighted median	75	-0.0253885	0.0231477	0.974931	0.953801	0.996529
CXCL1	Inverse variance weighted	75	-0.022658	0.00768257	0.977597	0.961445	0.99402
CXCL1	Simple mode	75	-0.00374579	0.861188	0.996261	0.955438	1.03883
CXCL1	Weighted mode	75	-0.0177656	0.0791068	0.982391	0.963365	1.00179
TGFBR3	MR Egger	8	0.364104	0.0163689	1.43922	1.15948	1.78646
TGFBR3	Weighted median	8	0.17586	8.74391e-05	1.19227	1.09199	1.30177
TGFBR3	Inverse variance weighted	8	0.165246	3.35039e-06	1.17968	1.10028	1.26482
TGFBR3	Simple mode	8	0.235365	0.0251487	1.26537	1.07548	1.48879
TGFBR3	Weighted mode	8	0.228778	0.010044	1.25706	1.10575	1.42908
CD209	MR Egger	37	0.0255081	0.302269	1.02584	0.978003	1.07601
CD209	Weighted median	37	0.03576	0.0134765	1.03641	1.00742	1.06623
CD209	Inverse variance weighted	37	0.0506356	0.000450878	1.05194	1.0226	1.08212
CD209	Simple mode	37	0.0140263	0.620375	1.01413	0.959832	1.07149
CD209	Weighted mode	37	0.0397623	0.00609633	1.04056	1.0131	1.06877
LGALS2	MR Egger	19	0.114213	0.0179322	1.12099	1.02918	1.22099
LGALS2	Weighted median	19	0.0555332	0.0291897	1.0571	1.00564	1.1112
LGALS2	Inverse variance weighted	19	0.0392154	0.0286634	1.03999	1.0041	1.07718
LGALS2	Simple mode	19	0.0218016	0.562269	1.02204	0.950682	1.09876
LGALS2	Weighted mode	19	0.0488826	0.0555968	1.0501	1.00207	1.10043
RARRES2	MR Egger	16	0.0551829	0.296985	1.05673	0.956323	1.16769
RARRES2	Weighted median	16	0.0438635	0.102497	1.04484	0.991251	1.10133
RARRES2	Inverse variance weighted	16	0.0780595	0.00403481	1.08119	1.02516	1.14027
RARRES2	Simple mode	16	0.08154	0.173298	1.08496	0.970209	1.21328
RARRES2	Weighted mode	16	0.04426	0.140353	1.04525	0.988604	1.10515
IDUA	MR Egger	78	0.0458205	0.00371506	1.04689	1.01595	1.07877
IDUA	Weighted median	78	0.0338654	0.00130089	1.03445	1.01331	1.05602
IDUA	Inverse variance weighted	78	0.0317568	0.000345809	1.03227	1.01447	1.05038
IDUA	Simple mode	78	0.0388148	0.0332776	1.03958	1.00372	1.07671
IDUA	Weighted mode	78	0.0351028	0.00197036	1.03573	1.01372	1.0582
ARSB	MR Egger	7	0.0177412	0.874009	1.0179	0.826431	1.25373
ARSB	Weighted median	7	0.0737127	0.0572267	1.0765	0.997738	1.16147
ARSB	Inverse variance weighted	7	0.0874768	0.0422427	1.09142	1.00307	1.18755
ARSB	Simple mode	7	0.0806643	0.17187	1.08401	0.978957	1.20033
ARSB	Weighted mode	7	0.0727367	0.116311	1.07545	0.995023	1.16237
NAAA	MR Egger	94	-0.00480233	0.680823	0.995209	0.972765	1.01817
NAAA	Weighted median	94	0.00784657	0.325891	1.00788	0.992223	1.02378
NAAA	Inverse variance weighted	94	0.015689	0.0329541	1.01581	1.00127	1.03057
NAAA	Simple mode	94	0.0424493	0.0131247	1.04336	1.0096	1.07826
NAAA	Weighted mode	94	0.013107	0.0447597	1.01319	1.00048	1.02607
ASAH2	MR Egger	87	-0.028163	0.00748373	0.97223	0.95284	0.992014
ASAH2	Weighted median	87	-0.0288292	0.000682872	0.971582	0.955552	0.987882
ASAH2	Inverse variance weighted	87	-0.0193384	0.00205593	0.980847	0.968859	0.992984
ASAH2	Simple mode	87	-0.0253063	0.116539	0.975011	0.94498	1.006
ASAH2	Weighted mode	87	-0.0301426	0.000123308	0.970307	0.95616	0.984663
RET	MR Egger	45	0.00320963	0.879217	1.00321	0.962768	1.04536
RET	Weighted median	45	0.036185	0.00767102	1.03685	1.00963	1.0648
RET	Inverse variance weighted	45	0.0562606	3.16473e-06	1.05787	1.03313	1.08321
RET	Simple mode	45	0.0164742	0.476353	1.01661	0.971925	1.06335
RET	Weighted mode	45	0.0325068	0.0108904	1.03304	1.00858	1.05809
SFRP1	MR Egger	25	-0.132679	0.140919	0.875746	0.73844	1.03858
SFRP1	Weighted median	25	-0.0388104	0.165165	0.961933	0.91063	1.01613
SFRP1	Inverse variance weighted	25	-0.056983	0.032567	0.94461	0.896518	0.995282
SFRP1	Simple mode	25	-0.0104929	0.810113	0.989562	0.90924	1.07698
SFRP1	Weighted mode	25	-2.67786e-05	0.999392	0.999973	0.934123	1.07047
TGFBI	MR Egger	69	-0.041559	0.0180282	0.959293	0.9276	0.992068
TGFBI	Weighted median	69	-0.0507785	0.000294445	0.950489	0.924714	0.976983
TGFBI	Inverse variance weighted	69	-0.0483386	1.23728e-06	0.952811	0.934377	0.971609
TGFBI	Simple mode	69	-0.0230429	0.440957	0.977221	0.921908	1.03585
TGFBI	Weighted mode	69	-0.0493724	0.000199517	0.951827	0.928692	0.975538
CNTN2	MR Egger	125	-0.0195542	0.105817	0.980636	0.957837	1.00398
CNTN2	Weighted median	125	-0.0258165	0.00434924	0.974514	0.957375	0.99196
CNTN2	Inverse variance weighted	125	-0.0221062	0.00143135	0.978136	0.964934	0.99152
CNTN2	Simple mode	125	-0.0202223	0.272943	0.979981	0.945335	1.0159
CNTN2	Weighted mode	125	-0.0202223	0.0210624	0.979981	0.963498	0.996746
FCGR2A	MR Egger	165	-0.0149442	0.01592	0.985167	0.973393	0.997083
FCGR2A	Weighted median	165	-0.0126536	0.0182714	0.987426	0.977104	0.997857
FCGR2A	Inverse variance weighted	165	-0.015245	1.279e-05	0.984871	0.97815	0.991638
FCGR2A	Simple mode	165	0.000877318	0.929101	1.00088	0.98175	1.02038
FCGR2A	Weighted mode	165	-0.00980441	0.0760355	0.990244	0.979643	1.00096
FCGR2B	MR Egger	164	-0.00642484	0.289006	0.993596	0.981903	1.00543
FCGR2B	Weighted median	164	-0.0034671	0.51917	0.996539	0.986089	1.0071
FCGR2B	Inverse variance weighted	164	-0.00901033	0.0135496	0.99103	0.983967	0.998144
FCGR2B	Simple mode	164	-0.0185932	0.0767893	0.981579	0.961697	1.00187
FCGR2B	Weighted mode	164	-0.00500291	0.329069	0.99501	0.985092	1.00503
FCGR3B	MR Egger	50	0.0133647	0.492995	1.01345	0.975746	1.05262
FCGR3B	Weighted median	50	0.0274046	0.0753038	1.02778	0.997209	1.0593
FCGR3B	Inverse variance weighted	50	0.043822	7.06973e-05	1.0448	1.02246	1.06762
FCGR3B	Simple mode	50	0.070787	0.0225154	1.07335	1.01197	1.13846
FCGR3B	Weighted mode	50	0.0268381	0.0716284	1.0272	0.998272	1.05697
GFRA1	MR Egger	5	-0.0140966	0.904776	0.986002	0.797247	1.21945
GFRA1	Weighted median	5	0.1077	0.000458441	1.11371	1.0486	1.18287
GFRA1	Inverse variance weighted	5	0.128134	0.00542861	1.13671	1.03853	1.24416
GFRA1	Simple mode	5	0.212651	0.0556545	1.23695	1.05834	1.44571
GFRA1	Weighted mode	5	0.105187	0.0344086	1.11092	1.04061	1.18598
NTN4	MR Egger	20	0.0368114	0.230439	1.0375	0.978911	1.09959
NTN4	Weighted median	20	0.0420701	0.0515623	1.04297	0.999714	1.08809
NTN4	Inverse variance weighted	20	0.0502816	0.00262222	1.05157	1.01768	1.08658
NTN4	Simple mode	20	0.0415279	0.237331	1.0424	0.975134	1.11431
NTN4	Weighted mode	20	0.0382428	0.0932059	1.03898	0.995843	1.08399
RGMB	MR Egger	12	-0.0249514	0.756846	0.975357	0.836422	1.13737
RGMB	Weighted median	12	-0.061546	0.0701616	0.94031	0.879712	1.00508
RGMB	Inverse variance weighted	12	-0.0626044	0.0149477	0.939315	0.893129	0.98789
RGMB	Simple mode	12	-0.117839	0.0448316	0.888839	0.80261	0.984333
RGMB	Weighted mode	12	-0.0548522	0.181333	0.946625	0.877928	1.0207
THBS2	MR Egger	95	0.0170149	0.236859	1.01716	0.989064	1.04606
THBS2	Weighted median	95	0.0195266	0.0921096	1.01972	0.99681	1.04315
THBS2	Inverse variance weighted	95	0.0199604	0.00804965	1.02016	1.00521	1.03533
THBS2	Simple mode	95	0.0243004	0.292263	1.0246	0.979542	1.07173
THBS2	Weighted mode	95	0.0221486	0.0584615	1.0224	0.999486	1.04583
THBS4	MR Egger	21	-0.052032	0.199398	0.949299	0.879207	1.02498
THBS4	Weighted median	21	-0.0330285	0.128542	0.967511	0.927167	1.00961
THBS4	Inverse variance weighted	21	-0.0437162	0.0411696	0.957226	0.917887	0.99825
THBS4	Simple mode	21	-0.015205	0.654575	0.98491	0.922361	1.0517
THBS4	Weighted mode	21	-0.0277334	0.211926	0.972648	0.9325	1.01452
TPSB2	MR Egger	226	0.0151652	0.0168691	1.01528	1.00282	1.02789
TPSB2	Weighted median	226	0.00707691	0.243295	1.0071	0.995201	1.01915
TPSB2	Inverse variance weighted	226	0.00848053	0.030151	1.00852	1.00081	1.01628
TPSB2	Simple mode	226	0.0140494	0.270322	1.01415	0.989189	1.03974
TPSB2	Weighted mode	226	0.012125	0.0349734	1.0122	1.00092	1.0236
TNFSF8	MR Egger	8	-0.124396	0.247374	0.88303	0.73002	1.06811
TNFSF8	Weighted median	8	-0.081692	0.0501966	0.921556	0.849204	1.00007
TNFSF8	Inverse variance weighted	8	-0.0813349	0.0131493	0.921885	0.864483	0.983098
TNFSF8	Simple mode	8	-0.0504309	0.436342	0.95082	0.843515	1.07177
TNFSF8	Weighted mode	8	-0.0767404	0.12327	0.92613	0.84993	1.00916
INSR	MR Egger	3	-0.174116	0.490214	0.840199	0.603475	1.16978
INSR	Weighted median	3	0.186057	0.00534185	1.20449	1.0567	1.37296
INSR	Inverse variance weighted	3	0.161383	0.0436938	1.17513	1.00457	1.37466
INSR	Simple mode	3	0.256513	0.130084	1.29242	1.0565	1.58102
INSR	Weighted mode	3	0.254546	0.185654	1.28988	1.00312	1.6586
CXCL6	MR Egger	98	-0.0197166	0.15092	0.980477	0.954653	1.007
CXCL6	Weighted median	98	-0.0159452	0.132212	0.984181	0.96396	1.00483
CXCL6	Inverse variance weighted	98	-0.0166137	0.0251476	0.983524	0.969324	0.997931
CXCL6	Simple mode	98	-0.00779996	0.677915	0.99223	0.956476	1.02932
CXCL6	Weighted mode	98	-0.0158356	0.0905664	0.984289	0.966579	1.00232
CCL22	MR Egger	41	-0.0527592	0.0289521	0.948608	0.906327	0.992863
CCL22	Weighted median	41	-0.02985	0.0893266	0.970591	0.937736	1.0046
CCL22	Inverse variance weighted	41	-0.0313854	0.0116707	0.969102	0.94575	0.993031
CCL22	Simple mode	41	0.00336815	0.918469	1.00337	0.941088	1.06978
CCL22	Weighted mode	41	-0.0392713	0.106367	0.96149	0.917718	1.00735
CPB2	MR Egger	70	0.0142469	0.504615	1.01435	0.972991	1.05746
CPB2	Weighted median	70	0.0438371	0.00162222	1.04481	1.01672	1.07369
CPB2	Inverse variance weighted	70	0.02942	0.0106648	1.02986	1.00686	1.05338
CPB2	Simple mode	70	-0.00347799	0.916031	0.996528	0.934357	1.06284
CPB2	Weighted mode	70	0.0375734	0.0122022	1.03829	1.009	1.06842
ADIPOQ	MR Egger	30	0.0392494	0.310481	1.04003	0.965386	1.12045
ADIPOQ	Weighted median	30	-0.0192228	0.374601	0.980961	0.940205	1.02348
ADIPOQ	Inverse variance weighted	30	-0.0589611	0.0131801	0.942743	0.899802	0.987734
ADIPOQ	Simple mode	30	-0.0813933	0.035352	0.921831	0.85756	0.990919
ADIPOQ	Weighted mode	30	-0.0101414	0.621051	0.98991	0.951307	1.03008
AHSG	MR Egger	66	-0.0159851	0.539003	0.984142	0.935465	1.03535
AHSG	Weighted median	66	-0.00256869	0.863056	0.997435	0.968742	1.02698
AHSG	Inverse variance weighted	66	-0.0302549	0.0236123	0.970198	0.945109	0.995953
AHSG	Simple mode	66	-0.0193834	0.560711	0.980803	0.91911	1.04664
AHSG	Weighted mode	66	-0.00943582	0.516175	0.990609	0.962939	1.01907
CHIT1	MR Egger	133	0.0204071	0.0223419	1.02062	1.00311	1.03843
CHIT1	Weighted median	133	0.0174467	0.0234043	1.0176	1.00236	1.03307
CHIT1	Inverse variance weighted	133	0.0179522	0.00131049	1.01811	1.00703	1.02932
CHIT1	Simple mode	133	0.0317974	0.0441353	1.03231	1.00113	1.06446
CHIT1	Weighted mode	133	0.0206431	0.0020932	1.02086	1.00778	1.0341
DKK3	MR Egger	46	-0.034667	0.112509	0.965927	0.926237	1.00732
DKK3	Weighted median	46	-0.0155054	0.353205	0.984614	0.952905	1.01738
DKK3	Inverse variance weighted	46	-0.0370145	0.000699225	0.963662	0.943257	0.984508
DKK3	Simple mode	46	-0.0267751	0.429257	0.97358	0.911589	1.03979
DKK3	Weighted mode	46	-0.0220347	0.231065	0.978206	0.94402	1.01363
HGFAC	MR Egger	154	-0.0143946	0.0374556	0.985708	0.972549	0.999046
HGFAC	Weighted median	154	-0.0122713	0.0573717	0.987804	0.975381	1.00038
HGFAC	Inverse variance weighted	154	-0.00960365	0.0364063	0.990442	0.981572	0.999393
HGFAC	Simple mode	154	-0.00335283	0.773802	0.996653	0.974162	1.01966
HGFAC	Weighted mode	154	-0.0115999	0.0337903	0.988467	0.97803	0.999016
CST5	MR Egger	108	0.00284594	0.822627	1.00285	0.978264	1.02805
CST5	Weighted median	108	-0.00422373	0.64244	0.995785	0.978187	1.0137
CST5	Inverse variance weighted	108	-0.0150957	0.030043	0.985018	0.971675	0.998543
CST5	Simple mode	108	-0.0109168	0.565915	0.989143	0.953064	1.02659
CST5	Weighted mode	108	-0.0043989	0.609399	0.995611	0.979	1.0125
ESM1	MR Egger	8	-0.178894	0.227571	0.836195	0.644165	1.08547
ESM1	Weighted median	8	-0.0955715	0.0178413	0.908853	0.839754	0.983639
ESM1	Inverse variance weighted	8	-0.108496	0.0048518	0.897183	0.831943	0.967539
ESM1	Simple mode	8	-0.0893468	0.251244	0.914528	0.795035	1.05198
ESM1	Weighted mode	8	-0.0736491	0.102672	0.928998	0.860218	1.00328
EPHA5	MR Egger	4	-0.195384	0.252157	0.822518	0.646767	1.04603
EPHA5	Weighted median	4	-0.10222	0.0626048	0.902831	0.810729	1.0054
EPHA5	Inverse variance weighted	4	-0.0880463	0.0461957	0.915719	0.839786	0.998517
EPHA5	Simple mode	4	-0.132071	0.193565	0.876279	0.750435	1.02323
EPHA5	Weighted mode	4	-0.135484	0.159381	0.873293	0.75727	1.00709
NTF3	MR Egger	9	-0.0432417	0.641928	0.95768	0.804371	1.14021
NTF3	Weighted median	9	-0.0584557	0.232243	0.94322	0.856959	1.03816
NTF3	Inverse variance weighted	9	-0.0823641	0.0270985	0.920937	0.856066	0.990723
NTF3	Simple mode	9	-0.0685648	0.393077	0.933733	0.804572	1.08363
NTF3	Weighted mode	9	-0.0525071	0.410224	0.948848	0.842862	1.06816
KLKB1	MR Egger	52	0.00430248	0.840149	1.00431	0.963398	1.04696
KLKB1	Weighted median	52	0.0126502	0.444029	1.01273	0.98045	1.04607
KLKB1	Inverse variance weighted	52	0.0251508	0.0318068	1.02547	1.00219	1.04929
KLKB1	Simple mode	52	-0.00282533	0.920722	0.997179	0.943469	1.05395
KLKB1	Weighted mode	52	0.0159797	0.315546	1.01611	0.985191	1.048
PLAU	MR Egger	28	-0.068258	0.0139741	0.934019	0.887791	0.982656
PLAU	Weighted median	28	-0.0689194	0.000335877	0.933402	0.898895	0.969234
PLAU	Inverse variance weighted	28	-0.058531	1.7227e-05	0.943149	0.918308	0.968662
PLAU	Simple mode	28	-0.0654563	0.0734204	0.93664	0.8743	1.00343
PLAU	Weighted mode	28	-0.0755054	0.00162682	0.927275	0.888901	0.967305
IGF1R	MR Egger	11	0.297015	0.0736128	1.34584	1.00947	1.79427
IGF1R	Weighted median	11	-0.0880269	0.12833	0.915736	0.817519	1.02575
IGF1R	Inverse variance weighted	11	-0.101474	0.023119	0.903505	0.827758	0.986182
IGF1R	Simple mode	11	-0.0866417	0.40895	0.917006	0.753011	1.11672
IGF1R	Weighted mode	11	-0.0434671	0.60074	0.957464	0.817817	1.12096
IL1RL1	MR Egger	96	0.010718	0.249387	1.01078	0.99262	1.02926
IL1RL1	Weighted median	96	0.0102506	0.225958	1.0103	0.993678	1.02721
IL1RL1	Inverse variance weighted	96	0.0106246	0.0438487	1.01068	1.00029	1.02118
IL1RL1	Simple mode	96	0.022513	0.150177	1.02277	0.992126	1.05436
IL1RL1	Weighted mode	96	0.0114735	0.181741	1.01154	0.994771	1.02859
BOC	MR Egger	21	0.0249736	0.526732	1.02529	0.950343	1.10614
BOC	Weighted median	21	0.0697887	0.00573659	1.07228	1.02048	1.12671
BOC	Inverse variance weighted	21	0.0592324	0.00978139	1.06102	1.0144	1.10979
BOC	Simple mode	21	0.00673438	0.910306	1.00676	0.896766	1.13024
BOC	Weighted mode	21	0.0795852	0.00841448	1.08284	1.02656	1.1422
CLEC1B	MR Egger	8	-0.115369	0.197624	0.891037	0.762259	1.04157
CLEC1B	Weighted median	8	-0.0729165	0.0492151	0.929678	0.864517	0.999751
CLEC1B	Inverse variance weighted	8	-0.0735738	0.0138904	0.929068	0.876173	0.985155
CLEC1B	Simple mode	8	-0.131127	0.0592529	0.877107	0.782404	0.983273
CLEC1B	Weighted mode	8	-0.0721478	0.0947259	0.930393	0.864708	1.00107
ICAM1	MR Egger	140	0.0207396	0.00221694	1.02096	1.00773	1.03435
ICAM1	Weighted median	140	0.0180971	0.00128541	1.01826	1.0071	1.02954
ICAM1	Inverse variance weighted	140	0.0175405	7.16484e-06	1.0177	1.00993	1.02552
ICAM1	Simple mode	140	0.0186884	0.075198	1.01886	0.998257	1.0399
ICAM1	Weighted mode	140	0.0208627	4.80794e-05	1.02108	1.01118	1.03108
MST1	MR Egger	41	-0.0124479	0.492319	0.987629	0.953471	1.02301
MST1	Weighted median	41	0.0134484	0.0472516	1.01354	1.00016	1.02709
MST1	Inverse variance weighted	41	0.0178226	0.00547808	1.01798	1.00526	1.03087
MST1	Simple mode	41	0.0146684	0.21201	1.01478	0.992033	1.03804
MST1	Weighted mode	41	0.0137215	0.0936178	1.01382	0.998065	1.02982
PCSK7	MR Egger	171	-0.0225289	0.0221693	0.977723	0.959201	0.996603
PCSK7	Weighted median	171	-0.0239315	0.00179793	0.976353	0.961792	0.991134
PCSK7	Inverse variance weighted	171	-0.0137166	0.0259098	0.986377	0.974544	0.998354
PCSK7	Simple mode	171	-0.0207438	0.145657	0.97947	0.952602	1.0071
PCSK7	Weighted mode	171	-0.0232725	0.000626539	0.976996	0.964291	0.989869
CHST15	MR Egger	3	0.143149	0.74361	1.1539	0.597241	2.2294
CHST15	Weighted median	3	0.144261	0.00649875	1.15519	1.04119	1.28166
CHST15	Inverse variance weighted	3	0.140806	0.00406489	1.1512	1.04577	1.26727
CHST15	Simple mode	3	0.146918	0.140993	1.15826	1.02589	1.3077
CHST15	Weighted mode	3	0.145695	0.150422	1.15684	1.02054	1.31135
ADGRE2	MR Egger	64	0.0408549	0.00928137	1.0417	1.0111	1.07323
ADGRE2	Weighted median	64	0.0355269	0.0120534	1.03617	1.00782	1.06531
ADGRE2	Inverse variance weighted	64	0.0266607	0.00180075	1.02702	1.00997	1.04436
ADGRE2	Simple mode	64	0.0203096	0.388792	1.02052	0.974763	1.06842
ADGRE2	Weighted mode	64	0.0309043	0.0160513	1.03139	1.00645	1.05695
KYNU	MR Egger	45	-0.054664	0.0659119	0.946803	0.894545	1.00211
KYNU	Weighted median	45	-0.0717174	0.000119828	0.930794	0.897393	0.965438
KYNU	Inverse variance weighted	45	-0.0495815	0.00151261	0.951628	0.922917	0.981231
KYNU	Simple mode	45	-0.0251405	0.493941	0.975173	0.907942	1.04738
KYNU	Weighted mode	45	-0.0591995	0.00352569	0.942519	0.907713	0.978659
SMPDL3A	MR Egger	10	-0.0542757	0.179751	0.947171	0.88105	1.01825
SMPDL3A	Weighted median	10	-0.0692963	0.00443586	0.93305	0.889558	0.978668
SMPDL3A	Inverse variance weighted	10	-0.0673096	0.000822801	0.934906	0.898751	0.972515
SMPDL3A	Simple mode	10	-0.0620728	0.16089	0.939814	0.867881	1.01771
SMPDL3A	Weighted mode	10	-0.068017	0.0186834	0.934245	0.891742	0.978773
CCL7	MR Egger	71	-0.00316266	0.76485	0.996842	0.976477	1.01763
CCL7	Weighted median	71	-0.0215983	0.0301421	0.978633	0.959712	0.997928
CCL7	Inverse variance weighted	71	-0.024669	0.00095685	0.975633	0.961455	0.99002
CCL7	Simple mode	71	-0.014902	0.41091	0.985208	0.95103	1.02062
CCL7	Weighted mode	71	-0.0227029	0.014101	0.977553	0.960428	0.994983
MMP1	MR Egger	123	-0.0173915	0.141078	0.982759	0.960405	1.00563
MMP1	Weighted median	123	-0.0144641	0.135344	0.98564	0.967105	1.00453
MMP1	Inverse variance weighted	123	-0.0141218	0.0259626	0.985977	0.973798	0.99831
MMP1	Simple mode	123	-0.0354939	0.074873	0.965129	0.928471	1.00323
MMP1	Weighted mode	123	-0.0256881	0.0232545	0.974639	0.953519	0.996227
SHBG	MR Egger	17	-0.305722	0.0111014	0.736591	0.598884	0.905964
SHBG	Weighted median	17	-0.124375	0.000342255	0.883049	0.824936	0.945255
SHBG	Inverse variance weighted	17	-0.141089	2.48819e-05	0.868412	0.813278	0.927284
SHBG	Simple mode	17	-0.0316917	0.686627	0.968805	0.83287	1.12693
SHBG	Weighted mode	17	-0.207402	0.000693307	0.812693	0.737545	0.895497
ERAP1	MR Egger	137	-0.0171158	0.0156252	0.98303	0.969653	0.996591
ERAP1	Weighted median	137	-0.0222905	5.62928e-05	0.977956	0.967406	0.988622
ERAP1	Inverse variance weighted	137	-0.0172429	4.54679e-06	0.982905	0.975686	0.990177
ERAP1	Simple mode	137	-0.010099	0.375942	0.989952	0.968137	1.01226
ERAP1	Weighted mode	137	-0.022167	6.52125e-05	0.978077	0.967819	0.988443
CD274	MR Egger	24	-0.0361189	0.272567	0.964526	0.905719	1.02715
CD274	Weighted median	24	-0.0263966	0.260801	0.973949	0.930153	1.01981
CD274	Inverse variance weighted	24	-0.0413709	0.0103998	0.959473	0.929584	0.990323
CD274	Simple mode	24	-0.0115268	0.769369	0.988539	0.916057	1.06676
CD274	Weighted mode	24	-0.0210775	0.358889	0.979143	0.936876	1.02332
NOTCH3	MR Egger	3	-0.139312	0.542345	0.869957	0.636777	1.18853
NOTCH3	Weighted median	3	-0.133577	0.0583251	0.87496	0.761959	1.00472
NOTCH3	Inverse variance weighted	3	-0.131574	0.0357725	0.876714	0.775377	0.991295
NOTCH3	Simple mode	3	-0.133711	0.2594	0.874843	0.739452	1.03502
NOTCH3	Weighted mode	3	-0.133675	0.230517	0.874874	0.750179	1.0203
ROBO2	MR Egger	6	0.334073	0.0693686	1.39664	1.07076	1.82171
ROBO2	Weighted median	6	0.19482	0.00120372	1.21509	1.07993	1.36718
ROBO2	Inverse variance weighted	6	0.164818	0.00450466	1.17918	1.05242	1.32121
ROBO2	Simple mode	6	0.233736	0.0541927	1.26331	1.05213	1.51688
ROBO2	Weighted mode	6	0.207459	0.0363172	1.23055	1.0663	1.42009
SEMA6B	MR Egger	4	-0.201821	0.378287	0.817241	0.57453	1.16249
SEMA6B	Weighted median	4	-0.126876	0.0377542	0.880843	0.781472	0.992849
SEMA6B	Inverse variance weighted	4	-0.101495	0.0465637	0.903486	0.817546	0.998459
SEMA6B	Simple mode	4	-0.129819	0.222074	0.878254	0.744194	1.03646
SEMA6B	Weighted mode	4	-0.129819	0.163837	0.878254	0.764545	1.00888
ICAM5	MR Egger	85	-0.0519407	3.27396e-06	0.949385	0.930213	0.968953
ICAM5	Weighted median	85	-0.0485854	5.54244e-08	0.952576	0.936025	0.96942
ICAM5	Inverse variance weighted	85	-0.0360598	2.28249e-09	0.964583	0.953242	0.976058
ICAM5	Simple mode	85	-0.052387	0.0020874	0.948962	0.918775	0.98014
ICAM5	Weighted mode	85	-0.0421812	5.32515e-08	0.958696	0.945526	0.972049
TNFRSF19	MR Egger	7	0.103356	0.453326	1.10889	0.86424	1.42279
TNFRSF19	Weighted median	7	0.0779417	0.0679464	1.08106	0.994268	1.17543
TNFRSF19	Inverse variance weighted	7	0.0817814	0.0217196	1.08522	1.01202	1.16372
TNFRSF19	Simple mode	7	0.0641632	0.341449	1.06627	0.944043	1.20431
TNFRSF19	Weighted mode	7	0.0701411	0.213504	1.07266	0.971743	1.18406
UNC5C	MR Egger	26	-0.0536124	0.353529	0.947799	0.848165	1.05914
UNC5C	Weighted median	26	-0.0657691	0.0153366	0.936347	0.88786	0.987482
UNC5C	Inverse variance weighted	26	-0.0706244	0.00166894	0.931812	0.891671	0.97376
UNC5C	Simple mode	26	-0.0959305	0.0692566	0.908527	0.822853	1.00312
UNC5C	Weighted mode	26	-0.0818535	0.0160718	0.921407	0.865897	0.980475
PDE5A	MR Egger	31	0.00197019	0.969516	1.00197	0.906459	1.10755
PDE5A	Weighted median	31	-0.0555692	0.0182747	0.945947	0.903283	0.990626
PDE5A	Inverse variance weighted	31	-0.0494538	0.0156679	0.951749	0.914329	0.9907
PDE5A	Simple mode	31	-0.0453803	0.251431	0.955634	0.885646	1.03115
PDE5A	Weighted mode	31	-0.0525811	0.0277068	0.948777	0.907447	0.99199
ALCAM	MR Egger	14	-0.010947	0.889474	0.989113	0.850357	1.15051
ALCAM	Weighted median	14	-0.0449452	0.278932	0.95605	0.881344	1.03709
ALCAM	Inverse variance weighted	14	-0.059332	0.043233	0.942394	0.88971	0.998198
ALCAM	Simple mode	14	-0.0206521	0.79213	0.97956	0.842727	1.13861
ALCAM	Weighted mode	14	0.00255717	0.967453	1.00256	0.888751	1.13094
CTSD	MR Egger	40	-0.0175139	0.572331	0.982639	0.925164	1.04368
CTSD	Weighted median	40	0.0429337	0.0447931	1.04387	1.001	1.08858
CTSD	Inverse variance weighted	40	0.0352632	0.0241718	1.03589	1.00462	1.06814
CTSD	Simple mode	40	0.0221924	0.527887	1.02244	0.954948	1.0947
CTSD	Weighted mode	40	0.0356226	0.22924	1.03626	0.978692	1.09722
FGFR1	MR Egger	5	0.31862	0.223334	1.37523	0.914525	2.06802
FGFR1	Weighted median	5	0.106456	0.0686229	1.11233	0.9919	1.24738
FGFR1	Inverse variance weighted	5	0.123518	0.00590814	1.13147	1.03621	1.23548
FGFR1	Simple mode	5	0.0595757	0.590796	1.06139	0.868926	1.29648
FGFR1	Weighted mode	5	0.195618	0.0411269	1.21606	1.06881	1.38361
PDIA5	MR Egger	81	0.0310382	0.0847769	1.03152	0.996194	1.06811
PDIA5	Weighted median	81	0.0166742	0.0875065	1.01681	0.997551	1.03645
PDIA5	Inverse variance weighted	81	0.0307983	0.00640563	1.03128	1.00869	1.05437
PDIA5	Simple mode	81	-0.0272175	0.432111	0.97315	0.909572	1.04117
PDIA5	Weighted mode	81	0.0208338	0.041541	1.02105	1.00112	1.04138
HPSE	MR Egger	4	-0.280732	0.280489	0.755231	0.518782	1.09945
HPSE	Weighted median	4	-0.165326	0.0223357	0.847617	0.735531	0.976783
HPSE	Inverse variance weighted	4	-0.160954	0.00820214	0.851331	0.755567	0.959232
HPSE	Simple mode	4	-0.172452	0.156125	0.841599	0.703357	1.00701
HPSE	Weighted mode	4	-0.168773	0.155983	0.844701	0.708718	1.00677
MFNG	MR Egger	6	-0.0878035	0.233532	0.915941	0.81014	1.03556
MFNG	Weighted median	6	-0.0752602	0.0617211	0.927502	0.857088	1.0037
MFNG	Inverse variance weighted	6	-0.0773389	0.0245229	0.925576	0.865243	0.990116
MFNG	Simple mode	6	-0.0857702	0.193881	0.917805	0.820504	1.02664
MFNG	Weighted mode	6	-0.0745086	0.122848	0.928199	0.857907	1.00425
PAM	MR Egger	84	-0.035873	0.00134807	0.964763	0.944541	0.985417
PAM	Weighted median	84	-0.0501134	1.18868e-09	0.951122	0.935884	0.966607
PAM	Inverse variance weighted	84	-0.036493	2.94001e-08	0.964165	0.951808	0.976682
PAM	Simple mode	84	-0.0432432	0.0154498	0.957678	0.925409	0.991073
PAM	Weighted mode	84	-0.0568176	2.99672e-11	0.944766	0.931141	0.958591
CRTAC1	MR Egger	54	-0.0195214	0.467772	0.980668	0.93069	1.03333
CRTAC1	Weighted median	54	0.0228307	0.130498	1.02309	0.993261	1.05382
CRTAC1	Inverse variance weighted	54	0.0298645	0.0453973	1.03031	1.00061	1.0609
CRTAC1	Simple mode	54	0.0112057	0.676059	1.01127	0.959766	1.06554
CRTAC1	Weighted mode	54	0.00732184	0.581746	1.00735	0.9816	1.03377
NTNG1	MR Egger	71	-0.00777426	0.388662	0.992256	0.97498	1.00984
NTNG1	Weighted median	71	-0.00358149	0.658334	0.996425	0.980733	1.01237
NTNG1	Inverse variance weighted	71	-0.0132996	0.0298815	0.986788	0.975014	0.998705
NTNG1	Simple mode	71	-0.0150837	0.292639	0.985029	0.957944	1.01288
NTNG1	Weighted mode	71	-0.0101811	0.154574	0.989871	0.97624	1.00369
CLEC3B	MR Egger	17	0.184161	0.0697034	1.20221	0.999364	1.44623
CLEC3B	Weighted median	17	0.160962	1.72838e-06	1.17464	1.09966	1.25473
CLEC3B	Inverse variance weighted	17	0.128876	0.00243954	1.13755	1.04658	1.23642
CLEC3B	Simple mode	17	0.0961796	0.358187	1.10096	0.902055	1.34372
CLEC3B	Weighted mode	17	0.164396	0.000433619	1.17868	1.09572	1.26792
LEAP2	MR Egger	38	-0.0830046	0.00375793	0.920347	0.873275	0.969956
LEAP2	Weighted median	38	-0.0601252	0.00337328	0.941647	0.904543	0.980272
LEAP2	Inverse variance weighted	38	-0.0563878	0.000203317	0.945173	0.917467	0.973715
LEAP2	Simple mode	38	-0.00627654	0.894534	0.993743	0.906252	1.08968
LEAP2	Weighted mode	38	-0.0564463	0.0196133	0.945117	0.903215	0.988963
SPINK6	MR Egger	64	-0.016807	0.079894	0.983333	0.965308	1.0017
SPINK6	Weighted median	64	-0.0198278	0.0368315	0.980368	0.962286	0.998789
SPINK6	Inverse variance weighted	64	-0.0148829	0.0229101	0.985227	0.972675	0.997942
SPINK6	Simple mode	64	-0.0231822	0.236113	0.977084	0.940665	1.01491
SPINK6	Weighted mode	64	-0.0190139	0.0244684	0.981166	0.96543	0.997158
TREML2	MR Egger	91	-0.0328217	0.0189218	0.967711	0.942019	0.994104
TREML2	Weighted median	91	-0.048463	2.23098e-05	0.952693	0.931589	0.974274
TREML2	Inverse variance weighted	91	-0.0437006	5.67471e-08	0.95724	0.942256	0.972463
TREML2	Simple mode	91	-0.082442	0.00171237	0.920865	0.875972	0.968058
TREML2	Weighted mode	91	-0.0432804	0.000219037	0.957643	0.936785	0.978965
CLPS	MR Egger	75	0.0404093	0.0635171	1.04124	0.998376	1.08594
CLPS	Weighted median	75	0.060957	1.28524e-05	1.06285	1.03414	1.09236
CLPS	Inverse variance weighted	75	0.0387465	0.00047529	1.03951	1.01716	1.06235
CLPS	Simple mode	75	0.0504517	0.0946141	1.05175	0.992083	1.115
CLPS	Weighted mode	75	0.063277	0.000124383	1.06532	1.0332	1.09844
ARG1	MR Egger	4	-0.201334	0.429202	0.817639	0.547318	1.22147
ARG1	Weighted median	4	-0.398481	9.78601e-11	0.671339	0.595001	0.75747
ARG1	Inverse variance weighted	4	-0.360152	1.99305e-09	0.69757	0.620126	0.784687
ARG1	Simple mode	4	-0.122446	0.33082	0.884754	0.719093	1.08858
ARG1	Weighted mode	4	-0.399789	0.00836081	0.670461	0.591153	0.76041
CRHBP	MR Egger	82	-0.0368695	0.0524134	0.963802	0.929071	0.999831
CRHBP	Weighted median	82	-0.0247247	0.0559639	0.975578	0.951154	1.00063
CRHBP	Inverse variance weighted	82	-0.0335085	0.0015528	0.967047	0.947184	0.987326
CRHBP	Simple mode	82	-0.0439566	0.0853976	0.956995	0.910803	1.00553
CRHBP	Weighted mode	82	-0.0283042	0.0184161	0.972093	0.949933	0.994769
CHRDL2	MR Egger	27	0.059757	0.0317433	1.06158	1.00831	1.11766
CHRDL2	Weighted median	27	0.0609392	0.00171129	1.06283	1.02312	1.10409
CHRDL2	Inverse variance weighted	27	0.0672537	6.65329e-06	1.06957	1.03872	1.10133
CHRDL2	Simple mode	27	0.103313	0.00978968	1.10884	1.03115	1.19238
CHRDL2	Weighted mode	27	0.0766262	0.00231629	1.07964	1.03267	1.12874
PSAP	MR Egger	45	-0.0498472	0.0372794	0.951375	0.909097	0.995619
PSAP	Weighted median	45	-0.0493897	0.0020319	0.95181	0.922412	0.982145
PSAP	Inverse variance weighted	45	-0.0276863	0.0199497	0.972693	0.950276	0.99564
PSAP	Simple mode	45	-0.016552	0.603557	0.983584	0.924432	1.04652
PSAP	Weighted mode	45	-0.0436672	0.00540597	0.957272	0.929682	0.985682
VIT	MR Egger	74	-0.0227783	0.251418	0.977479	0.940454	1.01596
VIT	Weighted median	74	-0.0366068	0.00233178	0.964055	0.9416	0.987046
VIT	Inverse variance weighted	74	-0.0402797	9.61091e-06	0.960521	0.943538	0.977809
VIT	Simple mode	74	-0.0392616	0.0918978	0.961499	0.919139	1.00581
VIT	Weighted mode	74	-0.0315872	0.0216715	0.968906	0.943676	0.994812
CPXM1	MR Egger	73	0.04386	0.0259629	1.04484	1.00608	1.08508
CPXM1	Weighted median	73	0.04371	0.00281656	1.04468	1.01514	1.07508
CPXM1	Inverse variance weighted	73	0.0351368	0.00202954	1.03576	1.0129	1.05914
CPXM1	Simple mode	73	-0.010233	0.792328	0.989819	0.917477	1.06787
CPXM1	Weighted mode	73	0.0476977	0.00464997	1.04885	1.01582	1.08296
NPNT	MR Egger	9	0.104536	0.361548	1.1102	0.899984	1.36951
NPNT	Weighted median	9	0.125247	0.000296133	1.13343	1.05909	1.21299
NPNT	Inverse variance weighted	9	0.092086	0.0171653	1.09646	1.01649	1.18273
NPNT	Simple mode	9	0.0968915	0.284395	1.10174	0.933673	1.30006
NPNT	Weighted mode	9	0.12355	0.00674767	1.13151	1.05836	1.20971
TXNDC15	MR Egger	22	0.0159144	0.592245	1.01604	0.959453	1.07597
TXNDC15	Weighted median	22	0.0493169	0.00126087	1.05055	1.01953	1.08252
TXNDC15	Inverse variance weighted	22	0.0616014	0.00402422	1.06354	1.01982	1.10913
TXNDC15	Simple mode	22	0.0111806	0.798059	1.01124	0.929241	1.10048
TXNDC15	Weighted mode	22	0.0454857	0.0141794	1.04654	1.01223	1.08201
MANBA	MR Egger	53	-0.0889041	0.000158073	0.914933	0.876688	0.954848
MANBA	Weighted median	53	-0.0940799	1.50308e-09	0.91021	0.88286	0.938407
MANBA	Inverse variance weighted	53	-0.0616866	1.16712e-06	0.940178	0.917082	0.963855
MANBA	Simple mode	53	-0.0401396	0.248552	0.960655	0.898025	1.02765
MANBA	Weighted mode	53	-0.0813181	3.08597e-07	0.9219	0.897206	0.947275
VWA1	MR Egger	40	0.018761	0.25386	1.01894	0.987106	1.0518
VWA1	Weighted median	40	0.0134484	0.327834	1.01354	0.986601	1.04121
VWA1	Inverse variance weighted	40	0.025592	0.0446364	1.02592	1.00061	1.05187
VWA1	Simple mode	40	0.0109098	0.670621	1.01097	0.961761	1.0627
VWA1	Weighted mode	40	0.0153868	0.191185	1.01551	0.992741	1.03879
CCDC126	MR Egger	31	0.0600583	0.161927	1.0619	0.978279	1.15267
CCDC126	Weighted median	31	0.0778466	0.000421909	1.08096	1.03518	1.12876
CCDC126	Inverse variance weighted	31	0.0533703	0.00867933	1.05482	1.0136	1.09771
CCDC126	Simple mode	31	0.0336869	0.473073	1.03426	0.944427	1.13264
CCDC126	Weighted mode	31	0.0824563	0.00144289	1.08595	1.03707	1.13714
PCYOX1	MR Egger	77	-4.81138e-07	0.999967	1	0.977235	1.02329
PCYOX1	Weighted median	77	-0.00848215	0.399369	0.991554	0.972185	1.01131
PCYOX1	Inverse variance weighted	77	-0.0170293	0.0249782	0.983115	0.968586	0.997862
PCYOX1	Simple mode	77	-0.020143	0.382815	0.980059	0.936956	1.02514
PCYOX1	Weighted mode	77	-0.00915793	0.341591	0.990884	0.972472	1.00964
FAM20A	MR Egger	12	0.0444512	0.402091	1.04545	0.946374	1.15491
FAM20A	Weighted median	12	-0.0385469	0.202007	0.962187	0.906863	1.02088
FAM20A	Inverse variance weighted	12	-0.0550853	0.0223041	0.946404	0.902729	0.992193
FAM20A	Simple mode	12	-0.024588	0.612813	0.975712	0.889479	1.0703
FAM20A	Weighted mode	12	-0.0352294	0.275869	0.965384	0.908964	1.02531
TIMP4	MR Egger	53	0.0955259	0.0169051	1.10024	1.01991	1.18689
TIMP4	Weighted median	53	0.0520198	0.00322176	1.0534	1.01756	1.0905
TIMP4	Inverse variance weighted	53	0.0612408	0.00463778	1.06315	1.01902	1.1092
TIMP4	Simple mode	53	0.0643107	0.104416	1.06642	0.988114	1.15094
TIMP4	Weighted mode	53	0.048191	0.00446366	1.04937	1.01655	1.08325
CFHR4	MR Egger	91	-0.0268835	0.000234659	0.973475	0.960188	0.986945
CFHR4	Weighted median	91	-0.0230029	2.83985e-05	0.97726	0.96679	0.987842
CFHR4	Inverse variance weighted	91	-0.0173061	4.62611e-05	0.982843	0.974693	0.991061
CFHR4	Simple mode	91	-0.0233194	0.00792036	0.97695	0.960648	0.993529
CFHR4	Weighted mode	91	-0.0202805	0.000294628	0.979924	0.969638	0.990319
DLK1	MR Egger	75	-0.00889432	0.700912	0.991145	0.947334	1.03698
DLK1	Weighted median	75	-0.0180158	0.217397	0.982146	0.954428	1.01067
DLK1	Inverse variance weighted	75	-0.0317881	0.00834873	0.968712	0.946098	0.991867
DLK1	Simple mode	75	-0.0566261	0.123925	0.944947	0.879902	1.0148
DLK1	Weighted mode	75	0.0040191	0.751725	1.00403	0.979426	1.02925
TRIL	MR Egger	3	0.0410498	0.748094	1.0419	0.859367	1.26321
TRIL	Weighted median	3	0.0838711	0.0522675	1.08749	0.999176	1.18361
TRIL	Inverse variance weighted	3	0.0907333	0.0214333	1.09498	1.01351	1.18299
TRIL	Simple mode	3	0.0840989	0.2499	1.08774	0.981511	1.20546
TRIL	Weighted mode	3	0.0820964	0.256325	1.08556	0.980014	1.20247
SERPINA12	MR Egger	107	0.00628525	0.640376	1.00631	0.980191	1.03311
SERPINA12	Weighted median	107	0.00405624	0.704372	1.00406	0.983245	1.02532
SERPINA12	Inverse variance weighted	107	0.0215172	0.00913774	1.02175	1.00535	1.03841
SERPINA12	Simple mode	107	0.0242525	0.301073	1.02455	0.97874	1.0725
SERPINA12	Weighted mode	107	0.0104516	0.341568	1.01051	0.989069	1.03241
ENPP5	MR Egger	126	0.0157377	0.0452032	1.01586	1.00049	1.03147
ENPP5	Weighted median	126	0.0142642	0.072445	1.01437	0.998701	1.03028
ENPP5	Inverse variance weighted	126	0.0167528	0.0012815	1.01689	1.00658	1.02732
ENPP5	Simple mode	126	0.0384543	0.0142287	1.0392	1.00817	1.07119
ENPP5	Weighted mode	126	0.0145434	0.0220063	1.01465	1.00226	1.0272
GFRAL	MR Egger	38	0.0119519	0.745982	1.01202	0.941944	1.08732
GFRAL	Weighted median	38	-0.0186122	0.406033	0.98156	0.939398	1.02561
GFRAL	Inverse variance weighted	38	-0.0353009	0.0279609	0.965315	0.935399	0.996187
GFRAL	Simple mode	38	-0.0335875	0.419397	0.96697	0.892074	1.04815
GFRAL	Weighted mode	38	-0.0160266	0.561125	0.984101	0.932778	1.03825
NDST1	MR Egger	9	0.146103	0.0467234	1.15732	1.02769	1.30329
NDST1	Weighted median	9	0.0876399	0.00635053	1.0916	1.02501	1.16251
NDST1	Inverse variance weighted	9	0.08498	0.00552699	1.0887	1.02526	1.15605
NDST1	Simple mode	9	0.0716459	0.159685	1.07427	0.98124	1.17613
NDST1	Weighted mode	9	0.0871882	0.0348022	1.0911	1.02006	1.16709
FUT10	MR Egger	95	0.00750842	0.539175	1.00754	0.983764	1.03188
FUT10	Weighted median	95	0.00165628	0.836015	1.00166	0.986071	1.01749
FUT10	Inverse variance weighted	95	0.0131904	0.0434204	1.01328	1.00039	1.02633
FUT10	Simple mode	95	0.0380037	0.0597985	1.03874	0.998909	1.08015
FUT10	Weighted mode	95	0.0040363	0.596149	1.00404	0.989217	1.01909
FAM20B	MR Egger	6	-0.0483715	0.744053	0.95278	0.726642	1.24929
FAM20B	Weighted median	6	-0.145592	0.00776432	0.86451	0.776636	0.962328
FAM20B	Inverse variance weighted	6	-0.113373	0.0360604	0.892818	0.803019	0.992658
FAM20B	Simple mode	6	-0.120535	0.212118	0.886446	0.751453	1.04569
FAM20B	Weighted mode	6	-0.167344	0.0524963	0.845909	0.743075	0.962974
ATP1B2	MR Egger	39	0.0414097	0.34505	1.04228	0.957482	1.13459
ATP1B2	Weighted median	39	0.0451937	0.0429838	1.04623	1.00143	1.09304
ATP1B2	Inverse variance weighted	39	0.0586753	0.00307325	1.06043	1.02002	1.10244
ATP1B2	Simple mode	39	0.0485308	0.37299	1.04973	0.944613	1.16654
ATP1B2	Weighted mode	39	0.0399591	0.0833682	1.04077	0.995924	1.08763
C1QTNF3	MR Egger	9	0.00327386	0.965857	1.00328	0.868158	1.15943
C1QTNF3	Weighted median	9	0.0694691	0.0919976	1.07194	0.988724	1.16216
C1QTNF3	Inverse variance weighted	9	0.087538	0.0060199	1.09148	1.02539	1.16184
C1QTNF3	Simple mode	9	0.118175	0.127136	1.12544	0.982259	1.28949
C1QTNF3	Weighted mode	9	0.0672518	0.155609	1.06956	0.983307	1.16339
KNG1	MR Egger	29	-0.040352	0.115815	0.960451	0.91482	1.00836
KNG1	Weighted median	29	-0.0393877	0.0425668	0.961378	0.925468	0.998681
KNG1	Inverse variance weighted	29	-0.0393343	0.0121531	0.961429	0.932321	0.991446
KNG1	Simple mode	29	-0.0195274	0.567537	0.980662	0.917883	1.04773
KNG1	Weighted mode	29	-0.0397991	0.0295299	0.960983	0.928848	0.994229
ROR2	MR Egger	16	0.0140639	0.87609	1.01416	0.852557	1.2064
ROR2	Weighted median	16	0.0633887	0.0446413	1.06544	1.00152	1.13344
ROR2	Inverse variance weighted	16	0.0805878	0.00267059	1.08392	1.02839	1.14246
ROR2	Simple mode	16	0.110072	0.0509641	1.11636	1.00841	1.23587
ROR2	Weighted mode	16	0.0754024	0.0315322	1.07832	1.01317	1.14766
TMEM132A	MR Egger	75	-0.0264946	0.0769759	0.973853	0.946066	1.00246
TMEM132A	Weighted median	75	-0.0191381	0.0594683	0.981044	0.961712	1.00076
TMEM132A	Inverse variance weighted	75	-0.0303161	0.000462033	0.970139	0.953816	0.986741
TMEM132A	Simple mode	75	-0.0247038	0.172599	0.975599	0.941895	1.01051
TMEM132A	Weighted mode	75	-0.0201697	0.0222329	0.980032	0.963583	0.996763
UGT1A6	MR Egger	24	-0.0416269	0.368858	0.959228	0.877606	1.04844
UGT1A6	Weighted median	24	-0.0533312	0.0202225	0.948066	0.906337	0.991716
UGT1A6	Inverse variance weighted	24	-0.052499	0.0172655	0.948855	0.908723	0.99076
UGT1A6	Simple mode	24	-0.0209248	0.634535	0.979293	0.899373	1.06631
UGT1A6	Weighted mode	24	-0.0537929	0.0269108	0.947628	0.90629	0.990852
SEMA4C	MR Egger	7	0.00377689	0.901007	1.00378	0.948566	1.06222
SEMA4C	Weighted median	7	0.0448839	0.0529091	1.04591	0.999436	1.09454
SEMA4C	Inverse variance weighted	7	0.0574282	0.01917	1.05911	1.00942	1.11125
SEMA4C	Simple mode	7	0.0512303	0.274769	1.05257	0.968187	1.1443
SEMA4C	Weighted mode	7	0.0339257	0.198273	1.03451	0.988018	1.08319
SPINT3	MR Egger	39	0.0325409	0.3859	1.03308	0.960649	1.11096
SPINT3	Weighted median	39	0.0220827	0.231577	1.02233	0.986002	1.05999
SPINT3	Inverse variance weighted	39	0.037445	0.0316147	1.03815	1.0033	1.07422
SPINT3	Simple mode	39	0.0341524	0.362319	1.03474	0.962284	1.11266
SPINT3	Weighted mode	39	0.0360856	0.0323417	1.03674	1.00426	1.07028
GLTPD2	MR Egger	20	-0.00697959	0.849768	0.993045	0.924807	1.06632
GLTPD2	Weighted median	20	0.0268328	0.255365	1.0272	0.980781	1.07581
GLTPD2	Inverse variance weighted	20	0.0540966	0.00290055	1.05559	1.01867	1.09385
GLTPD2	Simple mode	20	-0.00295688	0.958262	0.997047	0.893826	1.11219
GLTPD2	Weighted mode	20	0.0265551	0.298873	1.02691	0.978068	1.07819
CRTAM	MR Egger	39	-0.0374274	0.0751682	0.963264	0.925434	1.00264
CRTAM	Weighted median	39	-0.0518546	0.00489926	0.949467	0.915781	0.984391
CRTAM	Inverse variance weighted	39	-0.0482808	2.96316e-05	0.952866	0.931518	0.974704
CRTAM	Simple mode	39	-0.0524109	0.147008	0.948939	0.885325	1.01712
CRTAM	Weighted mode	39	-0.0478772	0.0128848	0.953251	0.919586	0.988148
TPST2	MR Egger	12	-0.0448328	0.68482	0.956157	0.774854	1.17988
TPST2	Weighted median	12	0.0838532	0.0291348	1.08747	1.00856	1.17256
TPST2	Inverse variance weighted	12	0.0824409	0.0380409	1.08593	1.00456	1.1739
TPST2	Simple mode	12	-0.0325278	0.720954	0.967996	0.813435	1.15192
TPST2	Weighted mode	12	0.0785765	0.111148	1.08175	0.989719	1.18233
ICAM5	MR Egger	80	-0.0502263	1.73833e-05	0.951014	0.930788	0.97168
ICAM5	Weighted median	80	-0.0505905	7.70888e-09	0.950668	0.934483	0.967133
ICAM5	Inverse variance weighted	80	-0.0364394	1.65737e-08	0.964217	0.952093	0.976495
ICAM5	Simple mode	80	-0.0538006	0.0031112	0.947621	0.915422	0.980953
ICAM5	Weighted mode	80	-0.0423515	4.80044e-07	0.958533	0.944138	0.973147
TNFRSF11B	MR Egger	25	0.0950368	0.0773818	1.0997	0.994301	1.21627
TNFRSF11B	Weighted median	25	0.0588929	0.048855	1.06066	1.00029	1.12467
TNFRSF11B	Inverse variance weighted	25	0.0438462	0.0269572	1.04482	1.00501	1.08621
TNFRSF11B	Simple mode	25	0.0208909	0.666281	1.02111	0.929706	1.1215
TNFRSF11B	Weighted mode	25	0.0515802	0.178067	1.05293	0.978938	1.13252
HYAL1	MR Egger	3	0.187561	0.239945	1.2063	1.04294	1.39525
HYAL1	Weighted median	3	0.126774	0.0168232	1.13516	1.0231	1.2595
HYAL1	Inverse variance weighted	3	0.120169	0.0118857	1.12769	1.02689	1.23837
HYAL1	Simple mode	3	0.0440025	0.718416	1.04498	0.848903	1.28636
HYAL1	Weighted mode	3	0.147541	0.111702	1.15898	1.04271	1.28822
GPX7	MR Egger	52	-0.0417565	0.0189867	0.959103	0.927267	0.992032
GPX7	Weighted median	52	-0.0327396	0.00692995	0.967791	0.945062	0.991065
GPX7	Inverse variance weighted	52	-0.0259877	0.0147512	0.974347	0.954205	0.994914
GPX7	Simple mode	52	-0.0314056	0.167788	0.969082	0.927376	1.01266
GPX7	Weighted mode	52	-0.0314056	0.00821496	0.969082	0.947635	0.991015
PRSS57	MR Egger	72	-0.0334441	0.0435973	0.967109	0.936749	0.998453
PRSS57	Weighted median	72	-0.0303577	0.00967827	0.970098	0.948042	0.992668
PRSS57	Inverse variance weighted	72	-0.0331955	0.000176775	0.967349	0.950711	0.984279
PRSS57	Simple mode	72	-0.0233421	0.317071	0.976928	0.933562	1.02231
PRSS57	Weighted mode	72	-0.0300963	0.0130936	0.970352	0.948122	0.993104
OXT	MR Egger	40	0.0504414	0.13322	1.05174	0.986106	1.12173
OXT	Weighted median	40	0.0439516	0.0144568	1.04493	1.00877	1.08239
OXT	Inverse variance weighted	40	0.0453694	0.00727734	1.04641	1.01231	1.08167
OXT	Simple mode	40	0.079037	0.0684104	1.08224	0.996388	1.1755
OXT	Weighted mode	40	0.0440511	0.0165671	1.04504	1.00962	1.0817
LHB	MR Egger	27	-0.0270503	0.35021	0.973312	0.920589	1.02906
LHB	Weighted median	27	-0.0236261	0.229844	0.976651	0.939704	1.01505
LHB	Inverse variance weighted	27	-0.0418501	0.0190104	0.959014	0.926052	0.993148
LHB	Simple mode	27	-0.0259693	0.546257	0.974365	0.89653	1.05896
LHB	Weighted mode	27	-0.0221475	0.256846	0.978096	0.942151	1.01541
QSOX2	MR Egger	55	-0.0449384	0.105533	0.956056	0.906263	1.00859
QSOX2	Weighted median	55	-0.0475789	0.00307691	0.953535	0.923962	0.984055
QSOX2	Inverse variance weighted	55	-0.0428865	0.00487156	0.95802	0.92984	0.987054
QSOX2	Simple mode	55	0.000217211	0.994361	1.00022	0.94201	1.06202
QSOX2	Weighted mode	55	-0.044932	0.00212193	0.956062	0.930331	0.982505
RSPO3	MR Egger	25	0.00782605	0.880267	1.00786	0.911302	1.11464
RSPO3	Weighted median	25	0.0371136	0.190582	1.03781	0.981706	1.09712
RSPO3	Inverse variance weighted	25	0.0963091	0.000594138	1.1011	1.04221	1.16332
RSPO3	Simple mode	25	0.187931	0.0210551	1.20675	1.0395	1.40091
RSPO3	Weighted mode	25	0.0420636	0.108662	1.04296	0.992612	1.09586
OLFML3	MR Egger	3	0.3954	0.350862	1.48498	0.922235	2.3911
OLFML3	Weighted median	3	0.11822	0.056582	1.12549	0.99669	1.27094
OLFML3	Inverse variance weighted	3	0.11775	0.0351216	1.12496	1.00825	1.25519
OLFML3	Simple mode	3	0.0541112	0.627458	1.0556	0.875726	1.27242
OLFML3	Weighted mode	3	0.15456	0.166811	1.16714	1.01247	1.34545
GPC1	MR Egger	52	0.0203174	0.230018	1.02053	0.987623	1.05452
GPC1	Weighted median	52	0.0182124	0.230868	1.01838	0.988486	1.04918
GPC1	Inverse variance weighted	52	0.0240193	0.0263689	1.02431	1.00282	1.04626
GPC1	Simple mode	52	0.0390639	0.233297	1.03984	0.975884	1.10798
GPC1	Weighted mode	52	0.0203687	0.165476	1.02058	0.992027	1.04995
TFRC	MR Egger	3	0.530128	0.546861	1.69915	0.509478	5.6668
TFRC	Weighted median	3	0.25211	0.00122333	1.28674	1.10438	1.4992
TFRC	Inverse variance weighted	3	0.247785	0.000124896	1.28118	1.12884	1.45409
TFRC	Simple mode	3	0.248859	0.115376	1.28256	1.06935	1.53828
TFRC	Weighted mode	3	0.263757	0.107222	1.30181	1.08253	1.56551
PSAPL1	MR Egger	52	-0.0133787	0.442362	0.98671	0.953857	1.0207
PSAPL1	Weighted median	52	-0.0251488	0.0640831	0.975165	0.949547	1.00147
PSAPL1	Inverse variance weighted	52	-0.0263178	0.0128457	0.974026	0.954039	0.99443
PSAPL1	Simple mode	52	-0.0202584	0.411611	0.979945	0.934054	1.02809
PSAPL1	Weighted mode	52	-0.0202584	0.108406	0.979945	0.95642	1.00405
TMEM132B	MR Egger	5	-0.12819	0.298973	0.879686	0.719852	1.07501
TMEM132B	Weighted median	5	-0.0960006	0.00388411	0.908463	0.85115	0.969636
TMEM132B	Inverse variance weighted	5	-0.0905819	0.00330071	0.913399	0.859843	0.970292
TMEM132B	Simple mode	5	-0.0869444	0.12588	0.916728	0.839238	1.00137
TMEM132B	Weighted mode	5	-0.0984606	0.0611754	0.906231	0.840976	0.97655
NEO1	MR Egger	12	-0.0237916	0.854283	0.976489	0.762448	1.25062
NEO1	Weighted median	12	-0.123667	0.00349213	0.883674	0.813299	0.960138
NEO1	Inverse variance weighted	12	-0.122864	0.0213453	0.884384	0.796536	0.98192
NEO1	Simple mode	12	-0.13103	0.121579	0.877192	0.752679	1.0223
NEO1	Weighted mode	12	-0.125743	0.0414289	0.881842	0.792537	0.98121
SCARF2	MR Egger	6	-0.111073	0.646455	0.894874	0.576526	1.38901
SCARF2	Weighted median	6	-0.143885	0.00312552	0.865987	0.787165	0.952703
SCARF2	Inverse variance weighted	6	-0.13583	0.0458008	0.872991	0.764046	0.997472
SCARF2	Simple mode	6	-0.255229	0.0325652	0.774739	0.653209	0.91888
SCARF2	Weighted mode	6	-0.183332	0.0387083	0.832492	0.731696	0.947174
ERAP2	MR Egger	121	-0.00233013	0.810089	0.997673	0.978932	1.01677
ERAP2	Weighted median	121	0.0155624	0.0126131	1.01568	1.00334	1.02818
ERAP2	Inverse variance weighted	121	0.0103884	0.0236029	1.01044	1.00139	1.01957
ERAP2	Simple mode	121	0.0112824	0.419518	1.01135	0.984111	1.03934
ERAP2	Weighted mode	121	0.0179086	0.0279203	1.01807	1.00214	1.03425
SCUBE1	MR Egger	18	0.0635124	0.228715	1.06557	0.964689	1.17701
SCUBE1	Weighted median	18	0.0583652	0.032136	1.0601	1.00499	1.11824
SCUBE1	Inverse variance weighted	18	0.0561198	0.004776	1.05772	1.01729	1.09977
SCUBE1	Simple mode	18	0.0894153	0.0271603	1.09353	1.01706	1.17576
SCUBE1	Weighted mode	18	0.0726946	0.0278761	1.0754	1.01353	1.14105
SERPINA11	MR Egger	48	0.0024095	0.935666	1.00241	0.945748	1.06247
SERPINA11	Weighted median	48	0.0469072	0.0125901	1.04802	1.01011	1.08736
SERPINA11	Inverse variance weighted	48	0.0457897	0.00217894	1.04685	1.01664	1.07796
SERPINA11	Simple mode	48	0.0458151	0.193696	1.04688	0.97796	1.12066
SERPINA11	Weighted mode	48	0.0370868	0.0583812	1.03778	0.99962	1.0774
LCT	MR Egger	55	-0.00191043	0.766523	0.998091	0.985647	1.01069
LCT	Weighted median	55	0.012927	0.0135812	1.01301	1.00267	1.02346
LCT	Inverse variance weighted	55	0.0110317	0.00489162	1.01109	1.00335	1.01889
LCT	Simple mode	55	0.014267	0.0753766	1.01437	0.998845	1.03014
LCT	Weighted mode	55	0.014267	0.0114063	1.01437	1.0036	1.02526
PENK	MR Egger	89	-0.0186454	0.166237	0.981527	0.956168	1.00756
PENK	Weighted median	89	-0.00869901	0.399962	0.991339	0.971459	1.01163
PENK	Inverse variance weighted	89	-0.0127921	0.0397213	0.987289	0.975326	0.999399
PENK	Simple mode	89	0.00921701	0.659877	1.00926	0.968803	1.05141
PENK	Weighted mode	89	-0.00853652	0.435167	0.9915	0.970563	1.01289
PLXNB2	MR Egger	79	-0.0249593	0.114487	0.97535	0.945915	1.0057
PLXNB2	Weighted median	79	-0.00876556	0.450637	0.991273	0.968952	1.01411
PLXNB2	Inverse variance weighted	79	-0.0168178	0.0263381	0.983323	0.968838	0.998024
PLXNB2	Simple mode	79	-0.0558435	0.0260536	0.945687	0.901145	0.992431
PLXNB2	Weighted mode	79	-0.0173103	0.165641	0.982839	0.959297	1.00696
NPTX1	MR Egger	66	-0.0546612	0.0227114	0.946806	0.904339	0.991267
NPTX1	Weighted median	66	-0.0325383	0.0386816	0.967985	0.938583	0.998309
NPTX1	Inverse variance weighted	66	-0.041939	0.000547855	0.958928	0.936391	0.982008
NPTX1	Simple mode	66	-0.0202166	0.543376	0.979986	0.918442	1.04565
NPTX1	Weighted mode	66	-0.0446143	0.0167629	0.956366	0.922905	0.991041
AZGP1	MR Egger	17	-0.138061	0.115509	0.871045	0.740796	1.0242
AZGP1	Weighted median	17	-0.0792839	0.00333656	0.923778	0.876138	0.974008
AZGP1	Inverse variance weighted	17	-0.0921887	0.0120306	0.911933	0.848622	0.979967
AZGP1	Simple mode	17	-0.1662	0.0791	0.846877	0.711847	1.00752
AZGP1	Weighted mode	17	-0.0834569	0.0158362	0.919931	0.865814	0.97743
RCN1	MR Egger	5	-0.161026	0.17377	0.85127	0.71269	1.0168
RCN1	Weighted median	5	-0.0870183	0.0336324	0.91666	0.845945	0.993287
RCN1	Inverse variance weighted	5	-0.0789035	0.0294623	0.924129	0.860765	0.992158
RCN1	Simple mode	5	-0.0410104	0.505449	0.959819	0.859837	1.07143
RCN1	Weighted mode	5	-0.0689584	0.188112	0.933365	0.85708	1.01644
PSG9	MR Egger	35	0.0452601	0.174729	1.0463	0.981477	1.1154
PSG9	Weighted median	35	0.0455656	0.0645565	1.04662	0.997251	1.09843
PSG9	Inverse variance weighted	35	0.0487685	0.00638408	1.04998	1.01382	1.08743
PSG9	Simple mode	35	0.0573824	0.167096	1.05906	0.977965	1.14688
PSG9	Weighted mode	35	0.0462644	0.0617609	1.04735	0.999323	1.09769
PLA2G12B	MR Egger	3	0.0509332	0.732258	1.05225	0.841751	1.3154
PLA2G12B	Weighted median	3	0.129399	0.037136	1.13814	1.00774	1.28542
PLA2G12B	Inverse variance weighted	3	0.14548	0.00437448	1.15659	1.04647	1.27831
PLA2G12B	Simple mode	3	0.117917	0.265537	1.12515	0.967453	1.30855
PLA2G12B	Weighted mode	3	0.117917	0.23609	1.12515	0.980063	1.29172
DSG2	MR Egger	27	0.111853	0.0199578	1.11835	1.02395	1.22145
DSG2	Weighted median	27	0.0822885	0.00190593	1.08577	1.0308	1.14367
DSG2	Inverse variance weighted	27	0.068322	0.000107486	1.07071	1.03432	1.10838
DSG2	Simple mode	27	0.0170585	0.705038	1.0172	0.932112	1.11007
DSG2	Weighted mode	27	0.0739063	0.0186699	1.07671	1.0163	1.1407
MANSC4	MR Egger	54	-0.0727462	0.00109645	0.929837	0.892268	0.968987
MANSC4	Weighted median	54	-0.0602131	1.79594e-05	0.941564	0.916008	0.967833
MANSC4	Inverse variance weighted	54	-0.0391672	0.00279416	0.96159	0.937212	0.986602
MANSC4	Simple mode	54	-0.0307466	0.283657	0.969721	0.917241	1.0252
MANSC4	Weighted mode	54	-0.0630661	4.75336e-06	0.938881	0.916376	0.961939
LAMC2	MR Egger	70	0.00948932	0.534575	1.00953	0.979898	1.04007
LAMC2	Weighted median	70	0.0381577	0.000310976	1.0389	1.01757	1.06067
LAMC2	Inverse variance weighted	70	0.0366189	0.000102109	1.0373	1.01831	1.05664
LAMC2	Simple mode	70	0.0161493	0.407474	1.01628	0.978407	1.05562
LAMC2	Weighted mode	70	0.033804	0.00151283	1.03438	1.01385	1.05533
GSTM3	MR Egger	122	0.00700816	0.592788	1.00703	0.981565	1.03316
GSTM3	Weighted median	122	-0.0174902	0.0602061	0.982662	0.964899	1.00075
GSTM3	Inverse variance weighted	122	-0.0209048	0.00817449	0.979312	0.964257	0.994602
GSTM3	Simple mode	122	0.000866897	0.967108	1.00087	0.960547	1.04288
GSTM3	Weighted mode	122	-0.011733	0.203145	0.988336	0.970732	1.00626
DNER	MR Egger	29	-0.128361	0.00178467	0.879535	0.817946	0.945762
DNER	Weighted median	29	-0.0671778	0.00485647	0.935029	0.892322	0.97978
DNER	Inverse variance weighted	29	-0.074222	3.39766e-05	0.928466	0.896445	0.96163
DNER	Simple mode	29	0.00895036	0.863287	1.00899	0.912109	1.11616
DNER	Weighted mode	29	-0.0696617	0.0107773	0.932709	0.88724	0.980509
CEL	MR Egger	65	-0.0390066	0.0536253	0.961744	0.925075	0.999867
CEL	Weighted median	65	-0.0430251	0.00182945	0.957887	0.932316	0.98416
CEL	Inverse variance weighted	65	-0.0386791	0.00409839	0.962059	0.936983	0.987806
CEL	Simple mode	65	-0.0686061	0.00738048	0.933694	0.88941	0.980183
CEL	Weighted mode	65	-0.0426476	0.000612142	0.958249	0.936283	0.98073
TIRAP	MR Egger	15	0.00986321	0.810478	1.00991	0.933209	1.09292
TIRAP	Weighted median	15	0.00471497	0.862855	1.00473	0.952387	1.05994
TIRAP	Inverse variance weighted	15	0.0490501	0.0341951	1.05027	1.00366	1.09905
TIRAP	Simple mode	15	0.0186993	0.793527	1.01888	0.888091	1.16892
TIRAP	Weighted mode	15	0.000430373	0.988771	1.00043	0.943229	1.0611
DUSP28	MR Egger	21	0.0230596	0.320181	1.02333	0.979006	1.06966
DUSP28	Weighted median	21	0.0291803	0.161907	1.02961	0.988358	1.07258
DUSP28	Inverse variance weighted	21	0.036655	0.0140696	1.03734	1.00742	1.06813
DUSP28	Simple mode	21	0.049747	0.180305	1.05101	0.979725	1.12747
DUSP28	Weighted mode	21	0.0265009	0.201676	1.02686	0.987239	1.06806

## Sheet: Sheet5
Table S4. Association of the protein with type 2 diabetes: Cochran's Q test
Protein	Method	Q	Q_df	Q_pval
SIGLEC12	MR Egger	156.412	134	0.0901908
SIGLEC12	Inverse variance weighted	157.01	135	0.0945973
STAT3	MR Egger	6.66016	8	0.573703
STAT3	Inverse variance weighted	9.02598	9	0.434879
PCDH9	MR Egger	46.6454	44	0.364168
PCDH9	Inverse variance weighted	47.0132	45	0.390041
APMAP	MR Egger	15.7326	5	0.00765048
APMAP	Inverse variance weighted	15.772	6	0.0150316
PLOD3	MR Egger	34.2867	7	1.52219e-05
PLOD3	Inverse variance weighted	37.6195	8	8.84998e-06
MSMB	MR Egger	111.865	80	0.0108104
MSMB	Inverse variance weighted	114.352	81	0.00867973
GNRH2	MR Egger	5.84095	5	0.322004
GNRH2	Inverse variance weighted	6.82063	6	0.337754
ACE	MR Egger	178.939	91	1.08015e-07
ACE	Inverse variance weighted	178.975	92	1.52094e-07
SMPD1	MR Egger	39.8774	40	0.475712
SMPD1	Inverse variance weighted	40.0453	41	0.51293
HHIP	MR Egger	22.1851	7	0.00236029
HHIP	Inverse variance weighted	23.6579	8	0.00261469
CD58	MR Egger	2.97682	2	0.225732
CD58	Inverse variance weighted	3.19095	3	0.363111
SPINK7	MR Egger	0.117293	1	0.731989
SPINK7	Inverse variance weighted	0.251998	2	0.881616
REG4	MR Egger	34.6525	8	3.09295e-05
REG4	Inverse variance weighted	34.9032	9	6.19719e-05
HSPB1	MR Egger	103.088	51	2.19277e-05
HSPB1	Inverse variance weighted	110.849	52	3.814e-06
SVEP1	MR Egger	78.4072	76	0.40238
SVEP1	Inverse variance weighted	78.9332	77	0.417561
MTRF1L	MR Egger	31.616	11	0.000878735
MTRF1L	Inverse variance weighted	31.6235	12	0.00158139
SVEP1	MR Egger	81.5238	79	0.40067
SVEP1	Inverse variance weighted	84.3579	80	0.347913
TBCE	MR Egger	2.15975	3	0.53992
TBCE	Inverse variance weighted	2.22113	4	0.695163
TXNDC5	MR Egger	22.5132	18	0.209993
TXNDC5	Inverse variance weighted	22.5843	19	0.25615
FGFBP3	MR Egger	159.389	25	1.53471e-21
FGFBP3	Inverse variance weighted	185.886	26	4.29362e-26
UROS	MR Egger	15.3775	13	0.28438
UROS	Inverse variance weighted	16.8949	14	0.261821
TNR	MR Egger	2.06935	3	0.558139
TNR	Inverse variance weighted	3.20795	4	0.523648
APOL1	MR Egger	41.7109	32	0.116903
APOL1	Inverse variance weighted	42.6802	33	0.120599
HIBCH	MR Egger	70.3801	49	0.0242755
HIBCH	Inverse variance weighted	71.083	50	0.0266011
STAMBPL1	MR Egger	0.524319	3	0.913517
STAMBPL1	Inverse variance weighted	2.56079	4	0.633784
LYPLAL1	MR Egger	0.0930732	1	0.760306
LYPLAL1	Inverse variance weighted	0.117421	2	0.94298
PLEKHA1	MR Egger	53.6087	29	0.00358763
PLEKHA1	Inverse variance weighted	54.9788	30	0.00356956
TAX1BP3	MR Egger	0.204077	1	0.65145
TAX1BP3	Inverse variance weighted	0.627144	2	0.730832
HPGDS	MR Egger	117.123	63	4.13564e-05
HPGDS	Inverse variance weighted	118.412	64	4.19549e-05
TNFAIP8	MR Egger	33.3943	17	0.0100422
TNFAIP8	Inverse variance weighted	47.9431	18	0.000153521
TRDMT1	MR Egger	75.3443	43	0.00165948
TRDMT1	Inverse variance weighted	75.6693	44	0.00209929
PTGFRN	MR Egger	190.697	100	1.25067e-07
PTGFRN	Inverse variance weighted	193.841	101	8.03027e-08
ELMO1	MR Egger	2.2155	3	0.528902
ELMO1	Inverse variance weighted	2.4655	4	0.650825
ECI2	MR Egger	27.841	43	0.964479
ECI2	Inverse variance weighted	34.4917	44	0.847308
ALDH3B1	MR Egger	6.75527	1	0.00934714
ALDH3B1	Inverse variance weighted	6.81443	2	0.0331333
CCS	MR Egger	1.21871	3	0.74852
CCS	Inverse variance weighted	3.47198	4	0.482151
RSPO3	MR Egger	53.2784	17	1.29054e-05
RSPO3	Inverse variance weighted	53.9065	18	1.89765e-05
LYPD3	MR Egger	0.00249341	1	0.960175
LYPD3	Inverse variance weighted	0.109472	2	0.946735
NEGR1	MR Egger	30.9903	9	0.000297166
NEGR1	Inverse variance weighted	32.013	10	0.000398451
FSTL1	MR Egger	6.57665	8	0.582918
FSTL1	Inverse variance weighted	6.64605	9	0.673917
CD177	MR Egger	136.43	129	0.310191
CD177	Inverse variance weighted	136.715	130	0.326122
FLRT2	MR Egger	74.3987	40	0.000775659
FLRT2	Inverse variance weighted	74.4189	41	0.00108521
ISLR2	MR Egger	47.3733	32	0.0392444
ISLR2	Inverse variance weighted	48.3041	33	0.0416442
PXDN	MR Egger	8.72815	9	0.462737
PXDN	Inverse variance weighted	10.2303	10	0.420522
ARHGEF25	MR Egger	2.52284	3	0.471178
ARHGEF25	Inverse variance weighted	3.49924	4	0.477994
EIF1AD	MR Egger	5.13788	4	0.27344
EIF1AD	Inverse variance weighted	6.31874	5	0.276428
NADK	MR Egger	6.19076	5	0.288097
NADK	Inverse variance weighted	8.32007	6	0.215579
INHBB	MR Egger	49.5205	21	0.000425215
INHBB	Inverse variance weighted	50.802	22	0.000456436
IL12B	MR Egger	63.1336	52	0.138597
IL12B	Inverse variance weighted	64.5445	53	0.132941
CCL8	MR Egger	190.092	154	0.0254633
CCL8	Inverse variance weighted	190.293	155	0.0282585
MCF2L	MR Egger	1.48007	7	0.982992
MCF2L	Inverse variance weighted	1.4963	8	0.992769
NUDT12	MR Egger	117.85	37	2.30481e-10
NUDT12	Inverse variance weighted	122.606	38	7.79584e-11
IL15RA	MR Egger	109.771	87	0.0500177
IL15RA	Inverse variance weighted	111.398	88	0.0467604
IL18R1	MR Egger	72.4567	71	0.429634
IL18R1	Inverse variance weighted	72.4597	72	0.462639
MTHFS	MR Egger	118.825	77	0.00157269
MTHFS	Inverse variance weighted	118.845	78	0.0019912
EFNB2	MR Egger	0.112053	1	0.737819
EFNB2	Inverse variance weighted	2.74186	2	0.253871
AMIGO2	MR Egger	0.76773	5	0.979046
AMIGO2	Inverse variance weighted	3.12584	6	0.792895
ISG15	MR Egger	44.2994	26	0.0140327
ISG15	Inverse variance weighted	45.7128	27	0.0136585
PREP	MR Egger	9.26269	13	0.752827
PREP	Inverse variance weighted	9.26558	14	0.813671
CST6	MR Egger	7.22535	6	0.300509
CST6	Inverse variance weighted	8.60319	7	0.282414
SDF2	MR Egger	21.0154	20	0.396225
SDF2	Inverse variance weighted	25.1088	21	0.242482
BPIFB1	MR Egger	100.74	57	0.000315829
BPIFB1	Inverse variance weighted	101.647	58	0.0003479
BOLA1	MR Egger	21.0046	14	0.101514
BOLA1	Inverse variance weighted	22.0569	15	0.106321
FABP2	MR Egger	116.275	97	0.0887135
FABP2	Inverse variance weighted	117.223	98	0.0902469
FCGR3A	MR Egger	234.905	188	0.0114077
FCGR3A	Inverse variance weighted	235.966	189	0.0114827
GAS6	MR Egger	17.1015	24	0.844303
GAS6	Inverse variance weighted	19.1846	25	0.788185
GSTM1	MR Egger	250.869	137	1.04139e-08
GSTM1	Inverse variance weighted	250.945	138	1.39862e-08
SORD	MR Egger	37.4525	27	0.086926
SORD	Inverse variance weighted	38.0731	28	0.0970244
CD8A	MR Egger	40.8265	31	0.111439
CD8A	Inverse variance weighted	40.8276	32	0.136231
HEXB	MR Egger	14.7145	15	0.472169
HEXB	Inverse variance weighted	15.7898	16	0.467728
VNN2	MR Egger	146.209	101	0.00220849
VNN2	Inverse variance weighted	146.397	102	0.00262716
AGRN	MR Egger	44.2583	25	0.0101455
AGRN	Inverse variance weighted	44.2897	26	0.0140667
LEFTY2	MR Egger	10.509	15	0.786559
LEFTY2	Inverse variance weighted	10.8452	16	0.818938
BCHE	MR Egger	72.5699	48	0.0125374
BCHE	Inverse variance weighted	73.9265	49	0.0122197
ALAD	MR Egger	50.2223	33	0.0278616
ALAD	Inverse variance weighted	51.0601	34	0.0302985
GSS	MR Egger	14.7592	8	0.0639998
GSS	Inverse variance weighted	19.6353	9	0.0203017
PRSS27	MR Egger	19.9926	8	0.010364
PRSS27	Inverse variance weighted	20.4829	9	0.015155
VIM	MR Egger	2.51455	4	0.642031
VIM	Inverse variance weighted	2.51671	5	0.773977
NCAN	MR Egger	6.97588	7	0.431395
NCAN	Inverse variance weighted	13.4848	8	0.0962228
FCRLB	MR Egger	68.4902	50	0.0422409
FCRLB	Inverse variance weighted	68.6083	51	0.0505134
IL6R	MR Egger	190.714	114	8.89732e-06
IL6R	Inverse variance weighted	190.762	115	1.15528e-05
NLGN1	MR Egger	4.45293	6	0.615626
NLGN1	Inverse variance weighted	6.68259	7	0.462659
HSPG2	MR Egger	59.4154	25	0.000125804
HSPG2	Inverse variance weighted	60.0953	26	0.000162821
IGF2R	MR Egger	73.6343	60	0.111043
IGF2R	Inverse variance weighted	73.9334	61	0.123735
MYOC	MR Egger	55.4284	48	0.214906
MYOC	Inverse variance weighted	58.1353	49	0.174274
FAIM	MR Egger	75.7049	29	4.83596e-06
FAIM	Inverse variance weighted	90.4944	30	5.52529e-08
ENO3	MR Egger	36.0448	27	0.114323
ENO3	Inverse variance weighted	37.7913	28	0.102412
PDE5A	MR Egger	35.3579	25	0.0819236
PDE5A	Inverse variance weighted	35.502	26	0.101216
NME4	MR Egger	15.9636	10	0.100679
NME4	Inverse variance weighted	16.0096	11	0.140773
ATXN3	MR Egger	55.8614	29	0.00196285
ATXN3	Inverse variance weighted	66.4694	30	0.000141837
CFHR3	MR Egger	0.955717	2	0.62011
CFHR3	Inverse variance weighted	1.5297	3	0.675433
GSTZ1	MR Egger	232.279	181	0.00603387
GSTZ1	Inverse variance weighted	235.657	182	0.00453078
ADAMTSL1	MR Egger	87.7281	52	0.00142578
ADAMTSL1	Inverse variance weighted	87.9307	53	0.00182038
SEMA4A	MR Egger	13.619	8	0.092253
SEMA4A	Inverse variance weighted	14.3097	9	0.111727
DBI	MR Egger	34.305	20	0.0241342
DBI	Inverse variance weighted	44.7043	21	0.00189348
GSTA1	MR Egger	29.3671	42	0.929569
GSTA1	Inverse variance weighted	29.4529	43	0.942547
ANXA4	MR Egger	48.2978	25	0.00343499
ANXA4	Inverse variance weighted	48.2978	26	0.00498941
KREMEN1	MR Egger	60.9282	17	7.3796e-07
KREMEN1	Inverse variance weighted	63.284	18	5.9654e-07
SFRP4	MR Egger	7.37083	5	0.19449
SFRP4	Inverse variance weighted	9.17649	6	0.163893
MX1	MR Egger	77.6341	39	0.000229502
MX1	Inverse variance weighted	78.1635	40	0.000289359
CD46	MR Egger	18.3142	13	0.14595
CD46	Inverse variance weighted	19.305	14	0.153621
UGT1A1	MR Egger	37.1763	15	0.00119259
UGT1A1	Inverse variance weighted	38.8352	16	0.0011488
WWOX	MR Egger	0.453169	1	0.500834
WWOX	Inverse variance weighted	0.4534	2	0.79716
SNUPN	MR Egger	16.7568	5	0.00498482
SNUPN	Inverse variance weighted	17.6798	6	0.0070842
LDLRAP1	MR Egger	0.436156	2	0.804063
LDLRAP1	Inverse variance weighted	1.27644	3	0.734734
PSAT1	MR Egger	2.60166	3	0.457199
PSAT1	Inverse variance weighted	2.60776	4	0.625449
ALDH2	MR Egger	1.31365	4	0.859055
ALDH2	Inverse variance weighted	1.96026	5	0.854616
ALKBH3	MR Egger	36.4981	28	0.130349
ALKBH3	Inverse variance weighted	37.8592	29	0.125499
ARF4	MR Egger	1.20197	2	0.54827
ARF4	Inverse variance weighted	3.66838	3	0.299572
PRSS3	MR Egger	144.967	52	1.03604e-10
PRSS3	Inverse variance weighted	156.542	53	3.67781e-12
GSTM4	MR Egger	259.984	135	5.98532e-10
GSTM4	Inverse variance weighted	261.196	136	6.21697e-10
SLIT2	MR Egger	4.33963	5	0.501623
SLIT2	Inverse variance weighted	4.7298	6	0.578906
PPP1R14A	MR Egger	33.2551	13	0.00155999
PPP1R14A	Inverse variance weighted	38.0114	14	0.000517571
MPPED2	MR Egger	6.76242	2	0.0340063
MPPED2	Inverse variance weighted	6.83963	3	0.0771889
DTD1	MR Egger	12.9944	11	0.29369
DTD1	Inverse variance weighted	13.5006	12	0.33373
SRGN	MR Egger	46.3786	15	4.62787e-05
SRGN	Inverse variance weighted	46.9343	16	6.9725e-05
HAGH	MR Egger	4.68972	6	0.584179
HAGH	Inverse variance weighted	8.28704	7	0.307965
GSR	MR Egger	6.73601	5	0.241026
GSR	Inverse variance weighted	8.00451	6	0.237773
VPS26A	MR Egger	11.3469	5	0.0449201
VPS26A	Inverse variance weighted	22.3822	6	0.00103215
MATN3	MR Egger	155.575	137	0.13243
MATN3	Inverse variance weighted	158.584	138	0.110866
OLFM2	MR Egger	97.5699	83	0.130979
OLFM2	Inverse variance weighted	100.179	84	0.109966
APOE	MR Egger	126.291	32	3.80279e-13
APOE	Inverse variance weighted	126.609	33	6.81547e-13
CFI	MR Egger	17.4295	14	0.234013
CFI	Inverse variance weighted	17.4585	15	0.292202
MPO	MR Egger	67.6535	45	0.0160677
MPO	Inverse variance weighted	67.6937	46	0.0203058
MRC1	MR Egger	130.228	107	0.06296
MRC1	Inverse variance weighted	130.731	108	0.0675309
PRKCA	MR Egger	0.39367	1	0.530377
PRKCA	Inverse variance weighted	2.31181	2	0.314773
PLAUR	MR Egger	12.1694	13	0.513805
PLAUR	Inverse variance weighted	12.712	14	0.549315
SPINT2	MR Egger	136.071	81	0.000124663
SPINT2	Inverse variance weighted	136.086	82	0.000164108
TIE1	MR Egger	22.016	23	0.519285
TIE1	Inverse variance weighted	23.0828	24	0.514916
C5	MR Egger	8.8503	9	0.451206
C5	Inverse variance weighted	10.8934	10	0.365879
MAPK3	MR Egger	15.5219	18	0.625872
MAPK3	Inverse variance weighted	15.6967	19	0.677406
CXCL5	MR Egger	1.85659	4	0.762115
CXCL5	Inverse variance weighted	2.92338	5	0.711797
CXCL1	MR Egger	109.406	73	0.00374521
CXCL1	Inverse variance weighted	109.406	74	0.0047031
TGFBR3	MR Egger	4.29951	6	0.636215
TGFBR3	Inverse variance weighted	7.88235	7	0.343083
CD209	MR Egger	64.9099	35	0.00156419
CD209	Inverse variance weighted	67.9217	36	0.00101676
LGALS2	MR Egger	12.1095	17	0.793463
LGALS2	Inverse variance weighted	15.6705	18	0.615531
RARRES2	MR Egger	26.9123	14	0.019765
RARRES2	Inverse variance weighted	27.4648	15	0.02517
IDUA	MR Egger	131.698	76	7.79034e-05
IDUA	Inverse variance weighted	133.898	77	6.354e-05
ARSB	MR Egger	9.9084	5	0.0778727
ARSB	Inverse variance weighted	10.946	6	0.0900613
NAAA	MR Egger	189.468	92	9.88595e-09
NAAA	Inverse variance weighted	199.817	93	8.74854e-10
ASAH2	MR Egger	113.596	85	0.0208561
ASAH2	Inverse variance weighted	115.165	86	0.0195874
RET	MR Egger	66.4162	43	0.0124722
RET	Inverse variance weighted	80.1213	44	0.000712142
SFRP1	MR Egger	52.4447	23	0.000435677
SFRP1	Inverse variance weighted	54.3507	24	0.000382652
TGFBI	MR Egger	93.649	67	0.0174911
TGFBI	Inverse variance weighted	93.9814	68	0.0201872
CNTN2	MR Egger	210.321	123	1.58323e-06
CNTN2	Inverse variance weighted	210.438	124	2.04426e-06
FCGR2A	MR Egger	183.151	163	0.133562
FCGR2A	Inverse variance weighted	183.155	164	0.145582
FCGR2B	MR Egger	207.911	162	0.00867327
FCGR2B	Inverse variance weighted	208.283	163	0.00955195
FCGR3B	MR Egger	59.4811	48	0.123757
FCGR3B	Inverse variance weighted	63.9239	49	0.0745326
GFRA1	MR Egger	6.5365	3	0.088234
GFRA1	Inverse variance weighted	10.9184	4	0.027496
NTN4	MR Egger	21.4672	18	0.256502
NTN4	Inverse variance weighted	21.8341	19	0.292588
RGMB	MR Egger	5.9982	10	0.815415
RGMB	Inverse variance weighted	6.25666	11	0.855702
THBS2	MR Egger	114.314	93	0.0661258
THBS2	Inverse variance weighted	114.387	94	0.0750694
THBS4	MR Egger	41.8776	19	0.00184104
THBS4	Inverse variance weighted	42.0227	20	0.00274679
TPSB2	MR Egger	352.446	224	9.02182e-08
TPSB2	Inverse variance weighted	355.324	225	6.61694e-08
TNFSF8	MR Egger	3.99319	6	0.677598
TNFSF8	Inverse variance weighted	4.21527	7	0.754676
INSR	MR Egger	0.0131102	1	0.908842
INSR	Inverse variance weighted	4.4092	2	0.110295
CXCL6	MR Egger	142.148	96	0.00155792
CXCL6	Inverse variance weighted	142.257	97	0.00189779
CCL22	MR Egger	35.3814	39	0.635688
CCL22	Inverse variance weighted	36.564	40	0.625735
CPB2	MR Egger	123.013	68	5.03995e-05
CPB2	Inverse variance weighted	124.324	69	5.06434e-05
ADIPOQ	MR Egger	60.9286	28	0.000309518
ADIPOQ	Inverse variance weighted	81.7659	29	6.36994e-07
AHSG	MR Egger	130.468	64	1.87336e-06
AHSG	Inverse variance weighted	131.316	65	2.17294e-06
CHIT1	MR Egger	215.266	131	4.90582e-06
CHIT1	Inverse variance weighted	215.479	132	6.09739e-06
DKK3	MR Egger	38.4118	44	0.709201
DKK3	Inverse variance weighted	38.4281	45	0.744869
HGFAC	MR Egger	208.726	152	0.00155748
HGFAC	Inverse variance weighted	209.941	153	0.00154677
CST5	MR Egger	173.496	106	3.88828e-05
CST5	Inverse variance weighted	178.167	107	1.90412e-05
ESM1	MR Egger	11.692	6	0.0692038
ESM1	Inverse variance weighted	12.2928	7	0.0913317
EPHA5	MR Egger	1.2102	2	0.54602
EPHA5	Inverse variance weighted	2.09028	3	0.553881
NTF3	MR Egger	5.10245	7	0.647462
NTF3	Inverse variance weighted	5.33672	8	0.721055
KLKB1	MR Egger	58.971	50	0.180297
KLKB1	Inverse variance weighted	60.6032	51	0.168005
PLAU	MR Egger	30.8964	26	0.23215
PLAU	Inverse variance weighted	31.1308	27	0.265801
IGF1R	MR Egger	5.90666	9	0.749222
IGF1R	Inverse variance weighted	13.8131	10	0.181688
IL1RL1	MR Egger	89.6827	94	0.606801
IL1RL1	Inverse variance weighted	89.6829	95	0.634791
BOC	MR Egger	34.4071	19	0.0164464
BOC	Inverse variance weighted	36.5773	20	0.0131441
CLEC1B	MR Egger	6.73585	6	0.345968
CLEC1B	Inverse variance weighted	7.10217	7	0.41832
ICAM1	MR Egger	181.356	138	0.00782809
ICAM1	Inverse variance weighted	181.821	139	0.00859257
MST1	MR Egger	100.111	39	2.826e-07
MST1	Inverse variance weighted	108.408	40	3.17915e-08
PCSK7	MR Egger	326.638	169	4.05431e-12
PCSK7	Inverse variance weighted	329.254	170	2.97713e-12
CHST15	MR Egger	0.174766	1	0.675911
CHST15	Inverse variance weighted	0.174815	2	0.916303
ADGRE2	MR Egger	59.652	62	0.560988
ADGRE2	Inverse variance weighted	60.9232	63	0.550722
KYNU	MR Egger	85.6995	43	0.000117045
KYNU	Inverse variance weighted	85.7868	44	0.00016574
SMPDL3A	MR Egger	7.18923	8	0.51636
SMPDL3A	Inverse variance weighted	7.36651	9	0.599018
CCL7	MR Egger	74.2498	69	0.311192
CCL7	Inverse variance weighted	82.5438	70	0.14496
MMP1	MR Egger	167.932	121	0.00308782
MMP1	Inverse variance weighted	168.085	122	0.00362234
SHBG	MR Egger	41.029	15	0.000316556
SHBG	Inverse variance weighted	48.3429	16	4.19533e-05
ERAP1	MR Egger	179.746	135	0.00604851
ERAP1	Inverse variance weighted	179.747	136	0.00711651
CD274	MR Egger	18.534	22	0.6739
CD274	Inverse variance weighted	18.5698	23	0.725889
NOTCH3	MR Egger	0.00357397	1	0.952329
NOTCH3	Inverse variance weighted	0.00636941	2	0.99682
ROBO2	MR Egger	5.96038	4	0.202126
ROBO2	Inverse variance weighted	8.71455	5	0.121006
SEMA6B	MR Egger	0.689389	2	0.708437
SEMA6B	Inverse variance weighted	1.02803	3	0.794471
ICAM5	MR Egger	100.257	83	0.0955411
ICAM5	Inverse variance weighted	104.432	84	0.0649366
TNFRSF19	MR Egger	1.17908	5	0.946868
TNFRSF19	Inverse variance weighted	1.21031	6	0.976372
UNC5C	MR Egger	45.9483	24	0.00449075
UNC5C	Inverse variance weighted	46.1545	25	0.00615824
PDE5A	MR Egger	47.6795	29	0.0158631
PDE5A	Inverse variance weighted	49.6589	30	0.0134531
ALCAM	MR Egger	14.0995	12	0.294397
ALCAM	Inverse variance weighted	14.6444	13	0.330076
CTSD	MR Egger	45.5578	38	0.186543
CTSD	Inverse variance weighted	50.2105	39	0.107732
FGFR1	MR Egger	2.6798	3	0.443671
FGFR1	Inverse variance weighted	3.60119	4	0.46266
PDIA5	MR Egger	220.959	79	2.26995e-15
PDIA5	Inverse variance weighted	220.96	80	3.83316e-15
HPSE	MR Egger	0.404509	2	0.816887
HPSE	Inverse variance weighted	0.839199	3	0.84007
MFNG	MR Egger	5.38314	4	0.250194
MFNG	Inverse variance weighted	5.44305	5	0.364231
PAM	MR Egger	181.949	82	1.51611e-09
PAM	Inverse variance weighted	181.961	83	2.2792e-09
CRTAC1	MR Egger	128.293	52	2.17824e-08
CRTAC1	Inverse variance weighted	140.221	53	8.20359e-10
NTNG1	MR Egger	97.4199	69	0.0137442
NTNG1	Inverse variance weighted	98.4306	70	0.0141684
CLEC3B	MR Egger	52.7273	15	4.27999e-06
CLEC3B	Inverse variance weighted	54.2588	16	4.70424e-06
LEAP2	MR Egger	44.9059	36	0.14666
LEAP2	Inverse variance weighted	46.7101	37	0.131596
SPINK6	MR Egger	61.3216	62	0.500469
SPINK6	Inverse variance weighted	61.4016	63	0.533496
TREML2	MR Egger	141.57	89	0.000332647
TREML2	Inverse variance weighted	143.093	90	0.000315091
CLPS	MR Egger	129.809	73	4.84915e-05
CLPS	Inverse variance weighted	129.823	74	6.56789e-05
ARG1	MR Egger	3.14851	2	0.207162
ARG1	Inverse variance weighted	4.19668	3	0.240994
CRHBP	MR Egger	169.831	80	2.00532e-08
CRHBP	Inverse variance weighted	169.932	81	2.88109e-08
CHRDL2	MR Egger	31.8337	25	0.16288
CHRDL2	Inverse variance weighted	31.9895	26	0.193468
PSAP	MR Egger	64.0182	43	0.0203942
PSAP	Inverse variance weighted	65.8594	44	0.0180154
VIT	MR Egger	90.4803	72	0.0694984
VIT	Inverse variance weighted	91.7411	73	0.0682019
CPXM1	MR Egger	121.036	71	0.000199335
CPXM1	Inverse variance weighted	121.574	72	0.000235912
NPNT	MR Egger	14.1974	7	0.04778
NPNT	Inverse variance weighted	14.2296	8	0.0759746
TXNDC15	MR Egger	54.9505	20	4.17668e-05
TXNDC15	Inverse variance weighted	67.3646	21	9.23679e-07
MANBA	MR Egger	86.6799	51	0.00134764
MANBA	Inverse variance weighted	90.6439	52	0.00072566
VWA1	MR Egger	71.559	38	0.000801131
VWA1	Inverse variance weighted	72.4595	39	0.000901528
CCDC126	MR Egger	61.6518	29	0.000383128
CCDC126	Inverse variance weighted	61.7236	30	0.000566572
PCYOX1	MR Egger	95.9957	75	0.0515991
PCYOX1	Inverse variance weighted	100.512	76	0.0314309
FAM20A	MR Egger	6.04415	10	0.811541
FAM20A	Inverse variance weighted	10.999	11	0.443351
TIMP4	MR Egger	278.371	51	4.61755e-33
TIMP4	Inverse variance weighted	284.604	52	8.35236e-34
CFHR4	MR Egger	125.501	89	0.00656387
CFHR4	Inverse variance weighted	129.609	90	0.00399063
DLK1	MR Egger	160.453	73	1.64871e-08
DLK1	Inverse variance weighted	163.426	74	1.07101e-08
TRIL	MR Egger	0.0441466	1	0.833581
TRIL	Inverse variance weighted	0.348854	2	0.839938
SERPINA12	MR Egger	152.051	105	0.0018447
SERPINA12	Inverse variance weighted	155.038	106	0.00135221
ENPP5	MR Egger	169.685	124	0.00405927
ENPP5	Inverse variance weighted	169.727	125	0.00481198
GFRAL	MR Egger	46.9737	36	0.104188
GFRAL	Inverse variance weighted	49.6475	37	0.07995
NDST1	MR Egger	10.1576	7	0.179818
NDST1	Inverse variance weighted	12.112	8	0.146277
FUT10	MR Egger	168.957	93	2.48135e-06
FUT10	Inverse variance weighted	169.513	94	2.97875e-06
FAM20B	MR Egger	7.66586	4	0.104614
FAM20B	Inverse variance weighted	8.18212	5	0.14648
ATP1B2	MR Egger	100.114	37	1.01325e-07
ATP1B2	Inverse variance weighted	100.662	38	1.42452e-07
C1QTNF3	MR Egger	5.29353	7	0.624191
C1QTNF3	Inverse variance weighted	6.89588	8	0.547907
KNG1	MR Egger	36.8514	27	0.0978749
KNG1	Inverse variance weighted	36.8553	28	0.122086
ROR2	MR Egger	20.896	14	0.104326
ROR2	Inverse variance weighted	21.8258	15	0.112454
TMEM132A	MR Egger	123.614	73	0.000199791
TMEM132A	Inverse variance weighted	123.788	74	0.000255481
UGT1A6	MR Egger	44.4028	22	0.00315726
UGT1A6	Inverse variance weighted	44.5565	23	0.00450249
SEMA4C	MR Egger	6.17989	5	0.289106
SEMA4C	Inverse variance weighted	13.3162	6	0.0382803
SPINT3	MR Egger	82.7198	37	2.39519e-05
SPINT3	Inverse variance weighted	82.7703	38	3.62252e-05
GLTPD2	MR Egger	22.2862	18	0.219525
GLTPD2	Inverse variance weighted	26.7731	19	0.11005
CRTAM	MR Egger	37.3089	37	0.454876
CRTAM	Inverse variance weighted	37.7285	38	0.481897
TPST2	MR Egger	20.2376	10	0.0270838
TPST2	Inverse variance weighted	23.5121	11	0.0149546
ICAM5	MR Egger	104.149	78	0.0256507
ICAM5	Inverse variance weighted	107.348	79	0.0186482
TNFRSF11B	MR Egger	19.7398	23	0.657554
TNFRSF11B	Inverse variance weighted	20.9047	24	0.644342
HYAL1	MR Egger	0.374487	1	0.540569
HYAL1	Inverse variance weighted	1.78067	2	0.410518
GPX7	MR Egger	84.2263	50	0.0017572
GPX7	Inverse variance weighted	86.505	51	0.00140287
PRSS57	MR Egger	98.9993	70	0.0128436
PRSS57	Inverse variance weighted	98.9998	71	0.0157312
OXT	MR Egger	78.3887	38	0.000126466
OXT	Inverse variance weighted	78.4561	39	0.000183388
LHB	MR Egger	41.2984	25	0.0213523
LHB	Inverse variance weighted	42.0489	26	0.0242658
QSOX2	MR Egger	124.696	53	1.03619e-07
QSOX2	Inverse variance weighted	124.716	54	1.60828e-07
RSPO3	MR Egger	68.5177	23	2.0554e-06
RSPO3	Inverse variance weighted	80.5292	24	5.00943e-08
OLFML3	MR Egger	0.138991	1	0.709286
OLFML3	Inverse variance weighted	1.51696	2	0.468377
GPC1	MR Egger	66.7013	50	0.0571991
GPC1	Inverse variance weighted	66.8153	51	0.067751
TFRC	MR Egger	0.000993184	1	0.974859
TFRC	Inverse variance weighted	0.214435	2	0.89833
PSAPL1	MR Egger	65.8895	50	0.0653444
PSAPL1	Inverse variance weighted	67.0732	51	0.0650031
TMEM132B	MR Egger	0.339535	3	0.952429
TMEM132B	Inverse variance weighted	0.488168	4	0.974643
NEO1	MR Egger	42.1519	10	7.04609e-06
NEO1	Inverse variance weighted	45.3291	11	4.24633e-06
SCARF2	MR Egger	22.4646	4	0.000161953
SCARF2	Inverse variance weighted	22.5418	5	0.000412895
ERAP2	MR Egger	180.132	119	0.000253982
ERAP2	Inverse variance weighted	183.498	120	0.0001708
SCUBE1	MR Egger	15.943	16	0.456946
SCUBE1	Inverse variance weighted	15.9681	17	0.526099
SERPINA11	MR Egger	66.4113	46	0.0259967
SERPINA11	Inverse variance weighted	70.4877	47	0.0148809
LCT	MR Egger	57.3902	53	0.315773
LCT	Inverse variance weighted	64.118	54	0.163064
PENK	MR Egger	94.4403	87	0.274606
PENK	Inverse variance weighted	94.7072	88	0.293483
PLXNB2	MR Egger	96.9101	77	0.0622055
PLXNB2	Inverse variance weighted	97.3571	78	0.0681319
NPTX1	MR Egger	95.4876	64	0.00653595
NPTX1	Inverse variance weighted	96.0919	65	0.00733908
AZGP1	MR Egger	58.9536	15	3.81287e-07
AZGP1	Inverse variance weighted	60.4774	16	4.34808e-07
RCN1	MR Egger	3.38489	3	0.336001
RCN1	Inverse variance weighted	4.48808	4	0.343963
PSG9	MR Egger	38.7755	33	0.225343
PSG9	Inverse variance weighted	38.7952	34	0.262302
PLA2G12B	MR Egger	0.288649	1	0.591087
PLA2G12B	Inverse variance weighted	1.15129	2	0.562342
DSG2	MR Egger	22.8962	25	0.583626
DSG2	Inverse variance weighted	24.0023	26	0.575833
MANSC4	MR Egger	119.73	52	2.92658e-07
MANSC4	Inverse variance weighted	128.989	53	2.81168e-08
LAMC2	MR Egger	110.777	68	0.000811397
LAMC2	Inverse variance weighted	118.925	69	0.000178519
GSTM3	MR Egger	243.065	120	2.27158e-10
GSTM3	Inverse variance weighted	257.248	121	7.55801e-12
DNER	MR Egger	34.7124	27	0.146303
DNER	Inverse variance weighted	38.234	28	0.0940524
CEL	MR Egger	160.597	63	1.80025e-10
CEL	Inverse variance weighted	160.598	64	2.9126e-10
TIRAP	MR Egger	19.7869	13	0.100652
TIRAP	Inverse variance weighted	21.9072	14	0.0805406
DUSP28	MR Egger	21.0234	19	0.335509
DUSP28	Inverse variance weighted	21.7447	20	0.354522

## Sheet: Sheet6
Table S5. Association of the protein with type 2 diabetes: MR-Egger intercept test
Protein	Egger_intercept	SE	P-Value
SIGLEC12	0.000920293	0.00128597	0.475459
STAT3	-0.0129032	0.00838895	0.162577
PCDH9	-0.00186766	0.00317107	0.558895
APMAP	-0.00142526	0.0127385	0.915267
PLOD3	0.0189236	0.0229412	0.436645
MSMB	-0.00431008	0.00323174	0.186097
GNRH2	-0.00490206	0.00535294	0.401796
ACE	0.000515217	0.00380477	0.892584
SMPD1	0.00134979	0.00329438	0.684193
HHIP	-0.0063078	0.00925301	0.517339
CD58	-0.0045004	0.011865	0.740949
SPINK7	0.00787422	0.0214544	0.776064
REG4	0.00606777	0.0252232	0.815944
HSPB1	0.00779973	0.00398047	0.0555309
SVEP1	0.00134444	0.00188297	0.477413
MTRF1L	-0.000526816	0.0103429	0.96029
SVEP1	0.00306794	0.00185126	0.101441
TBCE	0.00358172	0.014457	0.820317
TXNDC5	0.00139627	0.00585968	0.814352
FGFBP3	-0.0182187	0.00893657	0.0521913
UROS	-0.00812529	0.00717405	0.277842
TNR	0.010705	0.0100324	0.364195
APOL1	0.00273929	0.00317651	0.394907
HIBCH	-0.00276038	0.00394574	0.487494
STAMBPL1	0.0178581	0.012514	0.248843
LYPLAL1	-0.00210569	0.0134947	0.901457
PLEKHA1	-0.00381108	0.0044267	0.39634
TAX1BP3	-0.0076851	0.0118153	0.632873
HPGDS	0.00212291	0.00254925	0.408128
TNFAIP8	0.0191102	0.00702206	0.0145098
TRDMT1	0.00171171	0.00397421	0.668833
PTGFRN	0.00310892	0.00242139	0.202129
ELMO1	-0.00808461	0.0161694	0.651451
ECI2	0.00759976	0.00294692	0.0134171
ALDH3B1	-0.00209422	0.0223768	0.940593
CCS	0.0151646	0.0101024	0.230323
RSPO3	0.00416505	0.00930361	0.660036
LYPD3	0.00408204	0.0124804	0.798759
NEGR1	-0.00840531	0.0154235	0.599019
FSTL1	0.00262537	0.0099663	0.798881
CD177	-0.000985109	0.00189935	0.60489
FLRT2	-0.00046406	0.00445334	0.917527
ISLR2	0.00404365	0.00509955	0.433651
PXDN	0.00933074	0.00761293	0.251437
ARHGEF25	-0.0125511	0.0127019	0.39594
EIF1AD	-0.00542309	0.00565601	0.391947
NADK	-0.0149541	0.0114032	0.246714
INHBB	0.00450423	0.00611002	0.469166
IL12B	-0.00291962	0.00270836	0.286007
CCL8	-0.000606044	0.00150322	0.687386
MCF2L	-0.000734799	0.00576679	0.902192
NUDT12	0.00598429	0.00489744	0.229465
IL15RA	0.00270842	0.00238515	0.259271
IL18R1	-0.000117964	0.00218751	0.957145
MTHFS	0.000284123	0.00244594	0.907827
EFNB2	-0.030617	0.0188799	0.351778
AMIGO2	-0.0169139	0.0110144	0.185228
ISG15	0.00387619	0.00425582	0.37077
PREP	-0.000346832	0.0064602	0.958
CST6	0.00659364	0.00616424	0.325904
SDF2	0.0104129	0.00527574	0.0623886
BPIFB1	-0.00307113	0.00428717	0.476698
BOLA1	0.00373388	0.0044585	0.416394
FABP2	-0.0021892	0.0024627	0.376233
FCGR3A	-0.00155664	0.00168927	0.357978
GAS6	-0.00622033	0.00430977	0.161861
GSTM1	-0.000424141	0.00209005	0.839488
SORD	-0.00296366	0.00443098	0.50927
CD8A	0.000110932	0.00387511	0.977346
HEXB	0.0050258	0.00484678	0.316194
VNN2	0.000763612	0.00211934	0.71937
AGRN	0.000819675	0.00615658	0.89515
LEFTY2	0.00385192	0.00664361	0.570661
BCHE	-0.00371918	0.00392626	0.348252
ALAD	-0.00286153	0.00385686	0.463377
GSS	-0.024676	0.0151784	0.142662
PRSS27	-0.00345374	0.00779718	0.669536
VIM	0.000447395	0.00964632	0.965231
NCAN	-0.0161729	0.00633919	0.0380339
FCRLB	0.000803781	0.0027372	0.77024
IL6R	0.000363834	0.00215352	0.866137
NLGN1	0.0145827	0.00976601	0.185994
HSPG2	-0.00257436	0.00481304	0.597465
IGF2R	-0.00133395	0.00270204	0.623331
MYOC	-0.00498436	0.00325549	0.132318
FAIM	-0.0102932	0.00432452	0.0240948
ENO3	0.00511868	0.00447519	0.262751
PDE5A	-0.0017659	0.00553271	0.752246
NME4	-0.00116745	0.00687431	0.868532
ATXN3	0.0108749	0.00463414	0.0259819
CFHR3	0.00818529	0.010804	0.527778
GSTZ1	0.00242871	0.00149697	0.106455
ADAMTSL1	0.00107268	0.00309528	0.730325
SEMA4A	0.00597422	0.00937912	0.541938
DBI	0.0106038	0.00430648	0.0230091
GSTA1	-0.000795888	0.00271568	0.770911
ANXA4	-6.73285e-06	0.00478936	0.998889
KREMEN1	-0.00608604	0.00750668	0.428714
SFRP4	-0.00909919	0.00822161	0.318789
MX1	0.00225201	0.004367	0.608984
CD46	0.00717442	0.00855508	0.416839
UGT1A1	-0.00711771	0.00870001	0.426091
WWOX	-0.000335933	0.0220785	0.990314
SNUPN	-0.00646626	0.0123216	0.622157
LDLRAP1	-0.00760946	0.00830118	0.456083
PSAT1	0.000762672	0.00976239	0.942649
ALDH2	0.00582789	0.00724755	0.466399
ALKBH3	0.00497551	0.00486899	0.315588
ARF4	0.0622346	0.0396278	0.25689
PRSS3	0.00990377	0.00486037	0.0466872
GSTM4	-0.00171701	0.00216403	0.428919
SLIT2	-0.00881951	0.0141195	0.559606
PPP1R14A	0.0108969	0.00799143	0.195849
MPPED2	-0.00198169	0.0131139	0.893751
DTD1	0.00445014	0.00679858	0.526195
SRGN	-0.00378912	0.0089379	0.677627
HAGH	0.0123844	0.00652958	0.106663
GSR	0.0142265	0.0146612	0.376437
VPS26A	0.021107	0.00957165	0.0785824
MATN3	-0.0026202	0.00160973	0.105882
OLFM2	-0.00321287	0.00215673	0.140095
APOE	0.00241385	0.00850056	0.778268
CFI	0.00142059	0.00930183	0.880797
MPO	0.000440765	0.00269421	0.870781
MRC1	-0.0010765	0.00167316	0.521344
PRKCA	-0.0261054	0.0188491	0.398119
PLAUR	0.00339924	0.00461463	0.474435
SPINT2	0.000248627	0.00256617	0.923056
TIE1	0.0045505	0.0044058	0.312415
C5	-0.010187	0.00712685	0.186672
MAPK3	-0.00404082	0.00966512	0.680832
CXCL5	0.0107205	0.0103794	0.360025
CXCL1	3.50945e-05	0.00268188	0.989595
TGFBR3	-0.0176602	0.00933001	0.107229
CD209	0.00473641	0.00371666	0.210927
LGALS2	-0.00913233	0.00483943	0.0763483
RARRES2	0.00350972	0.0065472	0.600328
IDUA	-0.00307223	0.00272621	0.263321
ARSB	0.00683755	0.00944958	0.501746
NAAA	0.00609244	0.00271786	0.0273897
ASAH2	0.00233521	0.00215548	0.2817
RET	0.0102261	0.00343298	0.00474269
SFRP1	0.0102718	0.011235	0.370062
TGFBI	-0.00135159	0.00277191	0.627424
CNTN2	-0.000631163	0.00241831	0.794534
FCGR2A	-0.00010388	0.00173897	0.952438
FCGR2B	-0.000925738	0.00172088	0.591354
FCGR3B	0.00592332	0.0031283	0.0643326
GFRA1	0.027537	0.0194176	0.251177
NTN4	0.00229284	0.00413336	0.585917
RGMB	-0.00399316	0.00785449	0.622205
THBS2	0.000538419	0.00221579	0.808547
THBS4	0.00124522	0.00485356	0.800278
TPSB2	-0.00220251	0.00162866	0.177627
TNFSF8	0.00451496	0.00958079	0.654108
INSR	0.0299309	0.0142753	0.283317
CXCL6	0.000772776	0.00283813	0.785989
CCL22	0.00305542	0.00280969	0.28351
CPB2	0.00280578	0.00329649	0.397678
ADIPOQ	-0.014738	0.00476265	0.00444061
AHSG	-0.0022664	0.00351402	0.521259
CHIT1	-0.000698974	0.00194157	0.719423
DKK3	-0.000335771	0.00263366	0.899132
HGFAC	0.00147461	0.00156761	0.348367
CST5	-0.00437486	0.00258964	0.0940884
ESM1	0.00798116	0.0143734	0.598785
EPHA5	0.010257	0.0109335	0.447211
NTF3	-0.00333972	0.00690005	0.643151
KLKB1	0.00340866	0.00289752	0.245003
PLAU	0.0019139	0.0043091	0.660607
IGF1R	-0.0276728	0.00984152	0.0203158
IL1RL1	-2.62322e-05	0.00213395	0.990218
BOC	0.00549619	0.00502057	0.287317
CLEC1B	0.00552585	0.00967357	0.588584
ICAM1	-0.00115039	0.00193329	0.55279
MST1	0.0169167	0.0094096	0.0799521
PCSK7	0.00217206	0.00186712	0.24634
CHST15	-0.000199729	0.028333	0.995512
ADGRE2	-0.00254231	0.00225484	0.26388
KYNU	0.000786207	0.00375548	0.835164
SMPDL3A	-0.00217278	0.00516046	0.684806
CCL7	-0.00501224	0.0018054	0.00707271
MMP1	0.000783244	0.00236283	0.740851
SHBG	0.0196331	0.0120064	0.122809
ERAP1	-4.84927e-05	0.00224478	0.982797
CD274	-0.000718367	0.00379406	0.851563
NOTCH3	0.00105903	0.0200301	0.966372
ROBO2	-0.0150127	0.0110426	0.245571
SEMA6B	0.00764971	0.0131455	0.619473
ICAM5	0.00443755	0.00238695	0.0665588
TNFRSF19	-0.0021907	0.0123962	0.866661
UNC5C	-0.00204642	0.00623641	0.745651
PDE5A	-0.00660617	0.00602073	0.281565
ALCAM	-0.00439126	0.00644861	0.508823
CTSD	0.00683374	0.00346892	0.0561593
FGFR1	-0.0147156	0.0153305	0.407922
PDIA5	-5.90697e-05	0.00336711	0.986048
HPSE	0.0092187	0.0139823	0.57746
MFNG	0.00175016	0.00829466	0.843202
PAM	-0.000191659	0.00264072	0.942318
CRTAC1	0.00864604	0.00393229	0.0323698
NTNG1	-0.00169024	0.00199776	0.400439
CLEC3B	-0.00625162	0.00947126	0.519222
LEAP2	0.00433627	0.00360558	0.23696
SPINK6	0.000533827	0.00188798	0.77831
TREML2	-0.00218881	0.00223725	0.330554
CLPS	-0.000317757	0.0034992	0.927893
ARG1	-0.0155452	0.019051	0.500238
CRHBP	0.000685072	0.00313907	0.827798
CHRDL2	0.00124091	0.00354728	0.729403
PSAP	0.00382554	0.00344	0.272285
VIT	-0.00301217	0.00300724	0.319872
CPXM1	-0.00135596	0.00241301	0.575928
NPNT	-0.00180125	0.0142991	0.903298
TXNDC15	0.0110044	0.00517701	0.0461825
MANBA	0.00541716	0.00354714	0.132892
VWA1	0.00181661	0.00262714	0.493468
CCDC126	-0.000957435	0.00520867	0.855437
PCYOX1	-0.00405182	0.00215705	0.0642115
FAM20A	-0.0124845	0.00560863	0.0501867
TIMP4	-0.0059939	0.00560892	0.290265
CFHR4	0.00407176	0.00238569	0.0913564
DLK1	-0.0041479	0.00356647	0.248607
TRIL	0.00642079	0.0116318	0.678902
SERPINA12	0.00271461	0.00189031	0.153956
ENPP5	0.000329463	0.00187109	0.860518
GFRAL	-0.0058239	0.00406844	0.160917
NDST1	-0.00875213	0.00754142	0.283873
FUT10	0.00182725	0.00330209	0.581344
FAM20B	-0.00599351	0.0115477	0.631139
ATP1B2	0.00255407	0.00567777	0.655452
C1QTNF3	0.0093402	0.00737864	0.24607
KNG1	0.000175574	0.00328071	0.957714
ROR2	0.00801142	0.0101507	0.443129
TMEM132A	-0.00089159	0.00278287	0.749592
UGT1A6	-0.00173484	0.00628661	0.785156
SEMA4C	0.014123	0.00587752	0.0614018
SPINT3	0.000832856	0.00553908	0.881297
GLTPD2	0.0104751	0.00550259	0.0730687
CRTAM	-0.00173212	0.00268516	0.52286
TPST2	0.0132674	0.0104302	0.232152
ICAM5	0.00381155	0.00246257	0.12572
TNFRSF11B	-0.00554692	0.00513936	0.291642
HYAL1	-0.0109149	0.00920446	0.446008
GPX7	0.00373361	0.00321017	0.250328
PRSS57	5.08337e-05	0.0027832	0.98548
OXT	-0.000810755	0.00448625	0.857548
LHB	-0.00251733	0.00373476	0.506479
QSOX2	0.000353877	0.0038885	0.927831
RSPO3	0.013419	0.00668282	0.0565306
OLFML3	-0.0214828	0.0183008	0.44919
GPC1	0.00072542	0.00248207	0.771294
TFRC	-0.0195959	0.0424157	0.72448
PSAPL1	-0.00233362	0.00246222	0.347805
TMEM132B	0.00469938	0.0121894	0.725558
NEO1	-0.012612	0.0145267	0.405644
SCARF2	-0.00301435	0.0257011	0.912287
ERAP2	0.00454508	0.00304804	0.138569
SCUBE1	-0.000882045	0.00557033	0.876165
SERPINA11	0.00584411	0.00347793	0.0996705
LCT	0.00666057	0.00267212	0.0158407
PENK	0.00132282	0.00266777	0.62125
PLXNB2	0.00172089	0.0028876	0.55295
NPTX1	0.00179721	0.00282378	0.526749
AZGP1	0.0069883	0.0112233	0.542859
RCN1	0.00904504	0.00914738	0.395654
PSG9	0.000463188	0.00358044	0.897853
PLA2G12B	0.011395	0.0122687	0.523495
DSG2	-0.00560543	0.0053297	0.302982
MANSC4	0.00693463	0.00345801	0.0501391
LAMC2	0.00610041	0.0027277	0.0286049
GSTM3	-0.00653454	0.00246954	0.00923498
DNER	0.00669657	0.00404612	0.109492
CEL	5.91114e-05	0.00260944	0.981999
TIRAP	0.00578636	0.00490257	0.259039
DUSP28	0.00256639	0.0031786	0.42943

## Sheet: Sheet7
Table S6. Association of the protein with type 2 diabetes: Reverse MR
Protein	method	nsnp	b	se	pval
ARG1	Wald ratio	1	-1.77729	0.193403	3.94594e-20
PAM	Wald ratio	1	-10.4697	0.123079	0
APOE	Inverse variance weighted	2	1.65952	1.81957	0.361747
MANBA	Wald ratio	1	-7.04509	0.144832	0
GSS	Wald ratio	1	2.96532	0.207404	2.27278e-46
NCAN	Inverse variance weighted	2	-0.923275	0.868443	0.287719
SHBG	Wald ratio	1	-3.45321	0.191641	1.37763e-72

## Sheet: Sheet8
Table S7. Association of the protein with type 2 diabetes: Validation processes
Protein	β	SE	P
APOE	0.088221	0.0226337	9.70846e-05
SVEP1	0.0435966	0.00985398	9.67709e-06
NCAN	-0.125493	0.0347124	0.000300093
CHRDL2	0.0515971	0.0190756	0.00683321
SHBG	-0.725139	0.0767253	3.3526e-21

## Sheet: Sheet9
Table S8. KEGG 2021 Human
Term	P-value	Adjusted P-value	Odds Ratio	Combined Score	Proteins
Other glycan degradation	0.000226706	0.013829	108.473	910.289	MANBA;HEXB
Staphylococcus aureus infection	0.00623782	0.151106	18.59	94.3837	FCGR2A;ICAM1
NF-kappa B signaling pathway	0.00743142	0.151106	16.942	83.0505	PLAU;ICAM1
Lysosome	0.0110733	0.168867	13.6984	61.687	MANBA;HEXB
Glycosaminoglycan degradation	0.023495	0.21779	46.1968	173.283	HEXB
Arginine biosynthesis	0.0271559	0.21779	39.5913	142.772	ARG1
Coronavirus disease	0.0337361	0.21779	7.46503	25.3004	FCGR2A;IL6R
African trypanosomiasis	0.045264	0.21779	23.0775	71.4306	ICAM1
Thyroid cancer	0.045264	0.21779	23.0775	71.4306	RET
Various types of N-glycan biosynthesis	0.0476538	0.21779	21.8607	66.5396	HEXB
Ferroptosis	0.0500379	0.21779	20.7656	62.1925	GSS
Glycosphingolipid biosynthesis	0.0547889	0.21779	18.8741	54.8153	HEXB
Amino sugar and nucleotide sugar metabolism	0.0583371	0.21779	17.6667	50.2001	HEXB
Arginine and proline metabolism	0.0606955	0.21779	16.9439	47.4748	ARG1
Malaria	0.0606955	0.21779	16.9439	47.4748	ICAM1
Cholesterol metabolism	0.0606955	0.21779	16.9439	47.4748	APOE
Cysteine and methionine metabolism	0.0606955	0.21779	16.9439	47.4748	GSS
Glutathione metabolism	0.0689053	0.232451	14.8207	39.6457	GSS
Viral myocarditis	0.0724027	0.232451	14.065	36.9277	ICAM1
Central carbon metabolism in cancer	0.0839697	0.238184	12.0205	29.7784	RET
Non-small cell lung cancer	0.0862665	0.238184	11.6808	28.6215	RET
Leishmaniasis	0.0919841	0.238184	10.9095	26.0317	FCGR2A
Complement and coagulation cascades	0.101061	0.238184	9.86657	22.6145	PLAU
Rheumatoid arthritis	0.110051	0.238184	9.00498	19.8723	ICAM1
Fc gamma R-mediated phagocytosis	0.114513	0.238184	8.62804	18.6975	FCGR2A
Prostate cancer	0.114513	0.238184	8.62804	18.6975	PLAU
Hematopoietic cell lineage	0.116736	0.238184	8.45111	18.1516	IL6R
AGE-RAGE signaling pathway in diabetic complications	0.117846	0.238184	8.36532	17.8882	ICAM1
Viral protein interaction with cytokine and cytokine receptor	0.117846	0.238184	8.36532	17.8882	IL6R
Amoebiasis	0.120061	0.238184	8.19884	17.3795	ARG1
Th17 cell differentiation	0.125576	0.238184	7.81014	16.2049	IL6R
HIF-1 signaling pathway	0.127772	0.238184	7.66474	15.7703	IL6R
TNF signaling pathway	0.131057	0.238184	7.45646	15.1524	ICAM1
Leukocyte transendothelial migration	0.13324	0.238184	7.32375	14.7618	ICAM1
Pathways in cancer	0.141641	0.238184	3.19652	6.24746	RET;IL6R
Platelet activation	0.144078	0.238184	6.72493	13.0289	FCGR2A
Osteoclast differentiation	0.147304	0.238184	6.56382	12.5714	FCGR2A
Natural killer cell mediated cytotoxicity	0.151587	0.238184	6.36058	11.9999	ICAM1
Systemic lupus erythematosus	0.155849	0.238184	6.16947	11.4682	FCGR2A
Yersinia infection	0.157972	0.238184	6.07812	11.2162	FCGR2A
Fluid shear stress and atherosclerosis	0.160091	0.238184	5.98943	10.9727	ICAM1
Cell adhesion molecules	0.16956	0.245184	5.62018	9.97329	ICAM1
Phagosome	0.173735	0.245184	5.4702	9.57406	FCGR2A
Non-alcoholic fatty liver disease	0.176854	0.245184	5.36282	9.29073	IL6R
JAK-STAT signaling pathway	0.184086	0.249539	5.12785	8.67812	IL6R
Influenza A	0.194313	0.257675	4.82554	7.90561	ICAM1
Tuberculosis	0.202405	0.261487	4.60801	7.36122	FCGR2A
Neutrophil extracellular trap formation	0.211416	0.261487	4.38542	6.81462	FCGR2A
Transcriptional misregulation in cancer	0.214398	0.261487	4.31588	6.64613	PLAU
Kaposi sarcoma-associated herpesvirus infection	0.215389	0.261487	4.29319	6.59137	ICAM1
Pathogenic Escherichia coli infection	0.219343	0.261487	4.20472	6.37906	FCGR2A
Epstein-Barr virus infection	0.224259	0.261487	4.09909	6.12795	ICAM1
Proteoglycans in cancer	0.227194	0.261487	4.03819	5.98441	PLAU
Lipid and atherosclerosis	0.236901	0.267015	3.84755	5.5409	ICAM1
Human T-cell leukemia virus 1 infection	0.240751	0.267015	3.77619	5.37726	ICAM1
Human cytomegalovirus infection	0.246491	0.268499	3.67392	5.14507	IL6R
Calcium signaling pathway	0.260659	0.278951	3.44073	4.6262	RET
Cytokine-cytokine receptor interaction	0.310453	0.326511	2.78926	3.26266	IL6R
MicroRNAs in cancer	0.323464	0.334429	2.65183	2.99304	PLAU
PI3K-Akt signaling pathway	0.360285	0.36629	2.3161	2.36441	IL6R
Alzheimer disease	0.372392	0.372392	2.22	2.19293	APOE

## Sheet: Sheet10
Table S9. DsigDB
Term	P-value	Adjusted P-value	Odds Ratio	Combined Score	Proteins
ARSENIC CTD 00005442	6.13188e-05	0.022007	8.79321	85.2891	RET;NCAN;GSS;ICAM5;APOE;IL6R;ICAM1
IRON CTD 00006166	6.92341e-05	0.022007	21.4275	205.233	GSS;TREML2;APOE;ICAM1
17-Hydroxyandrostan-3-one CTD 00006776	8.02764e-05	0.022007	20.6006	194.264	APOE;GAS6;SHBG;ICAM1
HEXACHLOROETHANE BOSS	8.53813e-05	0.022007	20.2652	189.852	PLAU;SHBG;IL6R;ICAM1
TOSYLPHENYLALANYL CHLOROMETHYL KETONE CTD 00006910	0.000109775	0.0220179	37.6951	343.669	PLAU;APOE;ICAM1
berberine BOSS	0.000128135	0.0220179	35.7039	319.994	PLAU;SHBG;ICAM1
raloxifene CTD 00007367	0.000161433	0.0221743	8.96053	78.2381	RET;PLAU;TGFBI;GAS6;SHBG;IL6R
estradiol CTD 00005920	0.000189191	0.0221743	4.60944	39.5156	RET;ARG1;GSS;CRTAM;ICAM1;TGFBR3;FCRLB;PLAU;SVEP1;TGFBI;GAS6;SHBG;IL6R;PAM
verteporfin MCF7 DOWN	0.000193568	0.0221743	16.2804	139.195	RET;HEXB;ERAP1;PAM
ACMC-20mvek CTD 00002629	0.000257515	0.025544	27.9447	230.947	PLAU;APOE;ICAM1
irbesartan CTD 00002968	0.000281099	0.025544	96.4106	788.331	RET;ERAP1
L-arginine BOSS	0.000297311	0.025544	26.5682	215.753	ARG1;SHBG;ICAM1
tamoxifen CTD 00006827	0.000375534	0.0297827	7.6087	60.0111	RET;PLAU;APOE;TGFBI;GAS6;SHBG
L-sorbose CTD 00006006	0.000407085	0.0299789	78.8656	615.664	SHBG;ICAM1
Antimycin A CTD 00005427	0.000478624	0.0328974	72.2862	552.599	IL6R;ICAM1
DEXMEDETOMIDINE BOSS	0.000516518	0.0332832	69.3913	525.181	SHBG;ICAM1
clindamycin HL60 UP	0.000716022	0.0434246	11.4094	82.6246	RET;NCAN;SVEP1;APOE
valsartan BOSS	0.000773425	0.0443001	55.9439	400.82	SHBG;ICAM1
chloropyramine PC3 UP	0.000821136	0.0445574	54.1929	385.031	PLAU;ICAM1
TAXIFOLIN CTD 00000115	0.000920721	0.045203	51	356.508	GAS6;ICAM1
Amiloride hydrochloride dihydrate BOSS	0.000920721	0.045203	51	356.508	PLAU;ICAM1
Decitabine CTD 00000750	0.00113377	0.0470717	4.77495	32.3847	WWOX;MANBA;PLAU;HEXB;SVEP1;TGFBI;IL6R;ICAM1
sevoflurane BOSS	0.00131265	0.0470717	42.2778	280.543	SHBG;ICAM1
ALDOSTERONE BOSS	0.00133616	0.0470717	15.6085	103.296	PLAU;SHBG;ICAM1
COPPER BOSS	0.00151789	0.0470717	14.9126	96.7893	TGFBI;SHBG;ICAM1
L-proline BOSS	0.00151789	0.0470717	14.9126	96.7893	WWOX;ARG1;SHBG
ethanol BOSS	0.00158984	0.0470717	14.6672	94.5175	PLAU;SHBG;ICAM1
sodium chloride BOSS	0.00158984	0.0470717	14.6672	94.5175	PLAU;SHBG;ICAM1
hydrogen peroxide BOSS	0.00163898	0.0470717	14.5081	93.0501	PLAU;SHBG;ICAM1
Coke BOSS	0.00163898	0.0470717	14.5081	93.0501	PLAU;SHBG;ICAM1
D-Norepinephrine d-bitartrate BOSS	0.00166391	0.0470717	14.4298	92.33	PLAU;SHBG;ICAM1
cholesterol BOSS	0.00166391	0.0470717	14.4298	92.33	APOE;SHBG;ICAM1
nitric oxide BOSS	0.00168907	0.0470717	14.3523	91.6188	ARG1;SHBG;ICAM1
cimetidine PC3 UP	0.00173941	0.0470717	8.91183	56.6276	FCGR2A;NCAN;ERAP1;APOE
cerivastatin BOSS	0.00174011	0.0470717	14.1998	90.2226	APOE;SHBG;ICAM1
Simvastatin and niacin BOSS	0.00174011	0.0470717	14.1998	90.2226	APOE;SHBG;ICAM1
furosemide BOSS	0.00176599	0.0470717	14.1247	89.5371	PLAU;SHBG;ICAM1
PIPERONYL BUTOXIDE BOSS	0.00176599	0.0470717	14.1247	89.5371	PLAU;SHBG;ICAM1
raloxifene BOSS	0.00184211	0.0470717	35.3611	222.664	SHBG;IL6R
LAMININ BOSS	0.00184507	0.0470717	13.9042	87.5301	PLAU;SHBG;ICAM1
Acetylcholine bromide BOSS	0.00187191	0.0470717	13.8322	86.877	PLAU;SHBG;ICAM1
cephaeline HL60 UP	0.00229565	0.0563527	6.30348	38.3046	TGFBR3;MANBA;FCGR2A;PLAU;ICAM1
quinisocaine PC3 UP	0.00237549	0.0569565	30.9301	186.897	ERAP1;ICAM1
albendazole CTD 00007095	0.00253974	0.0595108	29.8606	178.438	IL6R;ICAM1
Iniprol BOSS	0.00270922	0.0597694	28.8623	170.608	TGFBR3;SHBG
PHENCYCLIDINE CTD 00005881	0.00272543	0.0597694	12.0783	71.3237	PLAU;GSS;ICAM1
T0901317 CTD 00003912	0.00279591	0.0597694	28.3877	166.908	APOE;ICAM1
Telmisartan BOSS	0.00279591	0.0597694	28.3877	166.908	SHBG;ICAM1
Phorbol 12-myristate 13-acetate CTD 00006852	0.00284064	0.0597694	7.75266	45.4595	PLAU;CRTAM;IL6R;ICAM1
3,3',4,4',5-Pentachlorobiphenyl CTD 00001077	0.00311671	0.0637927	11.5041	66.3898	ICAM5;TGFBI;ICAM1
ketamine BOSS	0.0031556	0.0637927	26.6355	153.382	SHBG;ICAM1
Calcifediol BOSS	0.00324875	0.0644126	26.2306	150.288	SHBG;ICAM1
genistein CTD 00007324	0.00345411	0.0671921	4.83351	27.3973	TGFBR3;PLAU;GSS;GAS6;SHBG;IL6R
Perfluorooctanesulfonic acid CTD 00002876	0.00353585	0.0675085	25.0863	141.607	ARG1;ICAM1
profenamine PC3 UP	0.00363409	0.0681227	24.7267	138.9	PLAU;ICAM1
methylprednisolone BOSS	0.00393644	0.0712012	23.707	131.277	PLAU;ICAM1
propofol BOSS	0.00393644	0.0712012	23.707	131.277	SHBG;ICAM1
Arsenenous acid CTD 00000922	0.00424028	0.0753747	4.62383	25.2606	RET;FCRLB;WWOX;PLAU;GSS;ICAM1
warfarin BOSS	0.00435718	0.0761399	22.4709	122.15	PLAU;APOE
Isoflavone BOSS	0.00502566	0.0863576	20.8402	110.311	SHBG;ICAM1
IN1152 CTD 00001901	0.00537654	0.0908723	20.1102	105.09	ERAP1;ICAM1
Octa-2,4,6-trienoic acid CTD 00002551	0.00549594	0.0913922	19.8781	103.44	RET;TGFBI
Heparitin BOSS	0.00561656	0.0919155	19.6512	101.833	PLAU;ICAM1
SB 202190 CTD 00003161	0.0057384	0.092442	19.4294	100.267	PLAU;ICAM1
bezafibrate CTD 00005506	0.00586144	0.0929715	19.2126	98.7403	APOE;ICAM1
17-Ethynyl estradiol CTD 00005932	0.0062429	0.0975216	8.91302	45.2452	GAS6;SHBG;IL6R
tretinoin MCF7 UP	0.00636569	0.0979556	18.3913	93.0018	RET;TGFBI
D-Sorbitol BOSS	0.00688907	0.104451	17.6371	87.7942	SHBG;ICAM1
losartan BOSS	0.00715789	0.106953	17.2826	85.3681	SHBG;ICAM1
Imatinib CTD 00003267	0.00756995	0.109924	16.7767	81.9302	RET;ICAM1
MAGNESIUM BOSS	0.00756995	0.109924	16.7767	81.9302	SHBG;ICAM1
LITHOCHOLIC ACID CTD 00006221	0.00901911	0.116749	15.2843	71.9649	GSS;ICAM1
deferoxamine CTD 00005759	0.0102608	0.116749	14.2681	65.3395	PLAU;ICAM1
(17S)-17-hydroxy-13,17-dimethyl-1,2,6,7,8,14,15,16-octahydrocyclopenta[a]phenanthren-3-one CTD 00007088	0.0104485	0.116749	7.34678	33.5108	ARG1;HEXB;GSS
solanine HL60 UP	0.0109085	0.116749	13.8087	62.3906	TGFBR3;NCAN
Docosahexaenoic acid BOSS	0.011574	0.116749	13.3778	59.6516	APOE;ICAM1
1-Methyl-3-nitro-1-nitrosoguanidine CTD 00006318	0.0117432	0.116749	13.2742	58.9972	GSS;ICAM1
Agarose BOSS	0.0119134	0.116749	13.1723	58.3543	PLAU;ICAM1
Medroxyprogesterone acetate CTD 00006623	0.0122257	0.116749	6.92028	30.4784	RET;PLAU;ICAM1
9001-31-4 BOSS	0.0122571	0.116749	12.9729	57.102	PLAU;ICAM1
glutathione CTD 00006035	0.0124306	0.116749	12.8754	56.4921	GSS;ICAM1
3,7,11-trimethyldodeca-2,6,10-trien-1-yl trihydrogen diphosphate CTD 00000172	0.0136677	0.116749	83.1875	357.101	ICAM1
P-CRESOL CTD 00001567	0.0136677	0.116749	83.1875	357.101	ICAM1
proscillaridin CTD 00006639	0.0136677	0.116749	83.1875	357.101	IL6R
Chromium (Iii) Chloride CTD 00001073	0.0136677	0.116749	83.1875	357.101	ICAM1
Ginsenoside Rh1 CTD 00003920	0.0136677	0.116749	83.1875	357.101	ICAM1
meclizine CTD 00006252	0.0136677	0.116749	83.1875	357.101	RET
Glaucine Methiodide TTD 00008221	0.0136677	0.116749	83.1875	357.101	ERAP1
Deacetylchitin BOSS	0.0136751	0.116749	12.2319	52.5015	PLAU;ICAM1
atorvastatin BOSS	0.0136751	0.116749	12.2319	52.5015	APOE;ICAM1
ibuprofen CTD 00006137	0.0147833	0.116749	11.7291	49.4293	PLAU;ICAM1
4-Methylhistamine CTD 00001201	0.0149012	0.116749	75.6212	318.086	ICAM1
Sorafenib TTD 00011025	0.0149012	0.116749	75.6212	318.086	RET
hyperforin CTD 00000051	0.0149012	0.116749	75.6212	318.086	ICAM1
Candesartan cilexetil CTD 00002890	0.0149012	0.116749	75.6212	318.086	ICAM1
dexamethasone CTD 00005779	0.0151058	0.116749	6.38006	26.7495	PLAU;IL6R;ICAM1
nitrate BOSS	0.0153516	0.116749	11.4928	47.9999	SHBG;ICAM1
pyrithyldione HL60 DOWN	0.0159293	0.116749	11.2657	46.6355	RET;GSS
sanguinarine HL60 DOWN	0.0160785	0.116749	6.2278	25.7225	PLAU;ERAP1;ICAM1
carisoprodol BOSS	0.0161239	0.116749	11.192	46.1944	PLAU;ICAM1
AM-630 CTD 00003207	0.0161334	0.116749	69.316	286.058	ICAM1
methazolamide CTD 00006289	0.0161334	0.116749	69.316	286.058	RET
7-hydroxycoumarin CTD 00001513	0.0161334	0.116749	69.316	286.058	ERAP1
oxotremorine-M CTD 00001937	0.0161334	0.116749	69.316	286.058	ERAP1
Neocuproine CTD 00000090	0.0161334	0.116749	69.316	286.058	ICAM1
VECURONIUM BROMIDE CTD 00006983	0.0161334	0.116749	69.316	286.058	HEXB
herbimycin a CTD 00001010	0.0161334	0.116749	69.316	286.058	ICAM1
emetine PC3 UP	0.01652	0.116749	4.58338	18.8065	PLAU;TGFBI;IL6R;ICAM1
Pyrrolidine dithiocarbamate CTD 00001021	0.0167139	0.116749	10.9765	44.9103	PLAU;ICAM1
5630-53-5 CTD 00001286	0.017364	0.116749	63.9808	259.337	ICAM1
L-cysteine CTD 00005741	0.017364	0.116749	63.9808	259.337	RET
Estrone sulfate BOSS	0.018332	0.116749	10.4401	41.7509	SHBG;ICAM1
CHEMBL55802 CTD 00003118	0.0185931	0.116749	59.4077	236.738	ICAM1
naringin CTD 00000212	0.0185931	0.116749	59.4077	236.738	ICAM1
Dimaprit CTD 00007150	0.0185931	0.116749	59.4077	236.738	ICAM1
oxindole i TTD 00009978	0.0185931	0.116749	59.4077	236.738	RET
scopoletin TTD 00010903	0.0185931	0.116749	59.4077	236.738	ERAP1
A 77636 CTD 00002927	0.0185931	0.116749	59.4077	236.738	ERAP1
bicalutamide CTD 00002279	0.0189553	0.116749	10.2521	40.6563	ARG1;ICAM1
dirithromycin HL60 UP	0.0191651	0.116749	10.1909	40.3016	RET;APOE
morphine BOSS	0.0193759	0.116749	10.1304	39.9517	PLAU;SHBG
L-aspartic acid BOSS	0.0195876	0.116749	10.0707	39.6066	SHBG;ICAM1
alexidine CTD 00000048	0.0198208	0.116749	55.4444	217.399	IL6R
p-Propenylanisole CTD 00000298	0.0198208	0.116749	55.4444	217.399	PLAU
PYRENE CTD 00001472	0.0198208	0.116749	55.4444	217.399	ICAM1
Rimonabant hydrochloride CTD 00003133	0.0198208	0.116749	55.4444	217.399	ICAM1
sodium chloride CTD 00006751	0.0198208	0.116749	55.4444	217.399	ICAM1
1,3-Dimethylthiourea CTD 00001818	0.0198208	0.116749	55.4444	217.399	ICAM1
emetine HL60 UP	0.020033	0.116749	4.3122	16.8623	TGFBR3;MANBA;FCGR2A;ICAM1
dimethyl sulfoxide BOSS	0.0204444	0.116749	9.83851	38.2723	PLAU;ICAM1
palmitic acid BOSS	0.0204444	0.116749	9.83851	38.2723	PLAU;ICAM1
niclosamide HL60 UP	0.020661	0.116749	9.78211	37.9498	MANBA;ICAM1
O,P'-DDT CTD 00000838	0.020661	0.116749	9.78211	37.9498	SHBG;IL6R
dUTP BOSS	0.0208786	0.116749	9.72636	37.6316	PLAU;ICAM1
Palmatine CTD 00000225	0.021047	0.116749	51.9766	200.681	IL6R
curcumin II CTD 00002181	0.021047	0.116749	51.9766	200.681	PLAU
Diethylcarbamodithioic acid CTD 00005815	0.021047	0.116749	51.9766	200.681	ICAM1
puromycin CTD 00006652	0.021047	0.116749	51.9766	200.681	IL6R
Tosyllysyl chloromethane CTD 00006909	0.021047	0.116749	51.9766	200.681	ICAM1
leukotriene D4 CTD 00007224	0.021047	0.116749	51.9766	200.681	ICAM1
clopamide HL60 UP	0.0210972	0.116749	9.67123	37.3175	NCAN;APOE
histamine BOSS	0.0210972	0.116749	9.67123	37.3175	SHBG;ICAM1
CORTICOSTERONE BOSS	0.0210972	0.116749	9.67123	37.3175	APOE;ICAM1
1,9-Pyrazoloanthrone CTD 00003948	0.0213168	0.116749	9.61671	37.0076	PLAU;ICAM1
L-threonine BOSS	0.0213168	0.116749	9.61671	37.0076	PLAU;APOE
folic acid BOSS	0.0213168	0.116749	9.61671	37.0076	APOE;ICAM1
L-leucine BOSS	0.0215373	0.116749	9.5628	36.7018	PLAU;SHBG
bilirubin BOSS	0.0215373	0.116749	9.5628	36.7018	SHBG;ICAM1
maltotriose BOSS	0.0215373	0.116749	9.5628	36.7018	MANBA;ICAM1
Anethole trithione CTD 00005404	0.0222717	0.116749	48.9167	186.1	GSS
hesperidin CTD 00006087	0.0222717	0.116749	48.9167	186.1	ICAM1
Nebivolol CTD 00002249	0.0222717	0.116749	48.9167	186.1	ICAM1
fucose TTD 00008125	0.0222717	0.116749	48.9167	186.1	PLAU
lactic acid BOSS	0.0224289	0.116749	9.35302	35.5172	SHBG;ICAM1
Ethylparaben BOSS	0.0224289	0.116749	9.35302	35.5172	SHBG;ICAM1
D-Arginine BOSS	0.0226542	0.116749	9.302	35.2305	ARG1;SHBG
Quercetin dihydrate BOSS	0.0226542	0.116749	9.302	35.2305	PLAU;ICAM1
Erythorbic acid BOSS	0.0226542	0.116749	9.302	35.2305	SHBG;ICAM1
D-glucose BOSS	0.0228804	0.116749	9.25152	34.9474	SHBG;ICAM1
metformin BOSS	0.0231076	0.116749	9.20158	34.6678	SHBG;ICAM1
GLYCOPROTEIN BOSS	0.0231076	0.116749	9.20158	34.6678	IL6R;ICAM1
Superoxide BOSS	0.0231076	0.116749	9.20158	34.6678	SHBG;ICAM1
actinomycin D CTD 00005748	0.0233357	0.116749	9.15217	34.3918	PLAU;GAS6
glutathione BOSS	0.0233357	0.116749	9.15217	34.3918	PLAU;ICAM1
L-glutamine BOSS	0.0233357	0.116749	9.15217	34.3918	PLAU;SHBG
Trimethyl-beta-cyclodextrin CTD 00003512	0.023495	0.116749	46.1968	173.283	ICAM1
dequalinium CTD 00005770	0.023495	0.116749	46.1968	173.283	IL6R
ketamine CTD 00006188	0.023495	0.116749	46.1968	173.283	APOE
cannabidiol CTD 00005567	0.023495	0.116749	46.1968	173.283	ICAM1
raloxifene TTD 00010501	0.023495	0.116749	46.1968	173.283	IL6R
AGN-PC-0JHFVD BOSS	0.0235648	0.116749	9.10329	34.1191	IL6R;ICAM1
N-Acetyl-L-cysteine BOSS	0.0235648	0.116749	9.10329	34.1191	PLAU;ICAM1
Insulin BOSS	0.0235648	0.116749	9.10329	34.1191	SHBG;ICAM1
GONADORELIN BOSS	0.0237948	0.116749	9.05492	33.8499	PLAU;SHBG
cyclosporin A BOSS	0.0237948	0.116749	9.05492	33.8499	PLAU;ICAM1
Isoguanine BOSS	0.0237948	0.116749	9.05492	33.8499	SHBG;ICAM1
diazepam BOSS	0.0240257	0.116749	9.00706	33.584	PLAU;ICAM1
Angiotensin II, human BOSS	0.0240257	0.116749	9.00706	33.584	SHBG;ICAM1
Silica CTD 00006678	0.02407	0.116749	4.06541	15.1509	VIT;FCGR2A;ICAM5;ICAM1
folic acid CTD 00005997	0.0242576	0.116749	8.95969	33.3213	PLAU;GAS6
17-Hydroxy-17-methylandrost-4-en-3-one BOSS	0.0242576	0.116749	8.95969	33.3213	PLAU;SHBG
UNII-CXY7B3Q98Z BOSS	0.0244904	0.116749	8.91282	33.0619	SHBG;ICAM1
Medroxyprogesterone acetate	0.0247168	0.116749	43.7632	161.936	SHBG
GSK1007102B GSK	0.0247168	0.116749	43.7632	161.936	RET
Kinome 511 Roche	0.0247168	0.116749	43.7632	161.936	RET
F0447-0125 MCF7 DOWN	0.0247168	0.116749	43.7632	161.936	RET
TTNPB MCF7 UP	0.0247168	0.116749	43.7632	161.936	TGFBI
diflorasone PC3 UP	0.0247168	0.116749	43.7632	161.936	IL6R
domperidone PC3 UP	0.0247168	0.116749	43.7632	161.936	ICAM1
Sodium salicylate CTD 00006761	0.0247168	0.116749	43.7632	161.936	ICAM1
cytochalasin D CTD 00007076	0.0247168	0.116749	43.7632	161.936	ICAM1
Indoxyl sulfate BOSS	0.0247168	0.116749	43.7632	161.936	ICAM1
Congo red BOSS	0.0247168	0.116749	43.7632	161.936	TGFBI
Sunitinib TTD 00011140	0.0247168	0.116749	43.7632	161.936	RET
Dinoprostone BOSS	0.0247241	0.116749	8.86643	32.8056	PLAU;ICAM1
2-Butanone BOSS	0.0247241	0.116749	8.86643	32.8056	PLAU;ICAM1
water BOSS	0.0247241	0.116749	8.86643	32.8056	PLAU;ICAM1
11-cis-Retinal BOSS	0.0249588	0.116749	8.82051	32.5524	PLAU;ICAM1
5-Fluorouracil BOSS	0.0249588	0.116749	8.82051	32.5524	PLAU;SHBG
hydrocortisone BOSS	0.0251944	0.116749	8.77507	32.3022	SHBG;ICAM1
cephaeline PC3 UP	0.0255099	0.116749	5.19409	19.0555	PLAU;IL6R;ICAM1
dopamine BOSS	0.0256683	0.116749	8.68555	31.8108	PLAU;SHBG
losartan CTD 00007310	0.0259371	0.116749	41.5729	151.828	ICAM1
Lenvatinib FDA	0.0259371	0.116749	41.5729	151.828	RET
GW559768X GSK	0.0259371	0.116749	41.5729	151.828	RET
hycanthone PC3 UP	0.0259371	0.116749	41.5729	151.828	ICAM1
Styrene oxide CTD 00000717	0.0259371	0.116749	41.5729	151.828	TGFBR3
TEPROTIDE BOSS	0.0259371	0.116749	41.5729	151.828	SHBG
chlorothiazide BOSS	0.0259371	0.116749	41.5729	151.828	SHBG
kynurenic acid BOSS	0.0259371	0.116749	41.5729	151.828	SHBG
maltotetraose BOSS	0.0259371	0.116749	41.5729	151.828	MANBA
Vitamin D3 BOSS	0.026386	0.116749	8.55462	31.0954	SHBG;ICAM1
N-methyl-D-aspartic acid BOSS	0.026386	0.116749	8.55462	31.0954	PLAU;SHBG
norgestrel CTD 00006422	0.0268691	0.116749	8.46948	30.6322	GAS6;SHBG
scopoletin CTD 00006727	0.0271559	0.116749	39.5913	142.772	ERAP1
Dovitinib RBC	0.0271559	0.116749	39.5913	142.772	RET
BMS-540215 Kinome Scan	0.0271559	0.116749	39.5913	142.772	RET
AZD-1152HQPA Kinome Scan	0.0271559	0.116749	39.5913	142.772	RET
7-Ketocholesterol CTD 00000104	0.0271559	0.116749	39.5913	142.772	ICAM1
24939-16-0 CTD 00001660	0.0271559	0.116749	39.5913	142.772	PLAU
labetalol HL60 UP	0.0271559	0.116749	39.5913	142.772	ARG1
pioglitazone PC3 DOWN	0.0271559	0.116749	39.5913	142.772	PLAU
Garcinol CTD 00002324	0.0271559	0.116749	39.5913	142.772	ICAM1
Tozasertib TTD 00011505	0.0271559	0.116749	39.5913	142.772	RET
curcumin CTD 00000663	0.0273415	0.116749	5.05195	18.1837	PLAU;GAS6;ICAM1
epinephrine BOSS	0.0273557	0.116749	8.386	30.1798	SHBG;ICAM1
Sodium dichromate CTD 00000827	0.0276004	0.116749	8.34487	29.9575	PLAU;TGFBI
testosterone enanthate CTD 00000155	0.0280124	0.116749	5.003	17.8863	FCGR2A;APOE;IL6R
AMG-706 Kinome Scan	0.0283733	0.116749	37.7898	134.619	RET
Kinome 800 Roche	0.0283733	0.116749	37.7898	134.619	RET
Sunitinib RBC	0.0283733	0.116749	37.7898	134.619	RET
PHENANTHRENE CTD 00001483	0.0283733	0.116749	37.7898	134.619	ICAM1
8-Anilino-1-naphthalenesulfonic acid CTD 00001273	0.0283733	0.116749	37.7898	134.619	ERAP1
cytochalasin B MCF7 UP	0.0283733	0.116749	37.7898	134.619	TGFBI
(-)-Epigallocatechin gallate BOSS	0.0285881	0.116749	8.18427	29.0931	PLAU;ICAM1
carbon monoxide CTD 00005586	0.0295893	0.116749	36.1449	127.243	ICAM1
L-methionine CTD 00006293	0.0295893	0.116749	36.1449	127.243	ARG1
Prolinedithiocarbamate CTD 00002658	0.0295893	0.116749	36.1449	127.243	ICAM1
7-aminocephalosporanic acid PC3 UP	0.0295893	0.116749	36.1449	127.243	ERAP1
fenbendazole CTD 00005958	0.0295893	0.116749	36.1449	127.243	IL6R
isotretinoin PC3 UP	0.0295893	0.116749	36.1449	127.243	APOE
NORGESTIMATE CTD 00000907	0.0295893	0.116749	36.1449	127.243	SHBG
Tozasertib CTD 00004298	0.0295893	0.116749	36.1449	127.243	RET
S-1,2-Dichlorovinyl-N-acetylcysteine CTD 00002159	0.0295893	0.116749	36.1449	127.243	APOE
Bonuten CTD 00005895	0.0295893	0.116749	36.1449	127.243	APOE
jasplakinolide CTD 00002409	0.0295893	0.116749	36.1449	127.243	ICAM1
oxyphenbutazone BOSS	0.0298426	0.116749	7.99191	28.0661	SHBG;ICAM1
7646-79-9 CTD 00000928	0.0300469	0.116749	2.57543	9.02686	FCRLB;PLAU;GSS;ERAP1;SVEP1;TGFBI;GAS6;ICAM1
puromycin PC3 UP	0.0306432	0.116749	4.82514	16.8173	TGFBI;IL6R;ICAM1
FEXOFENADINE HYDROCHLORIDE CTD 00003191	0.0308037	0.116749	34.6372	120.541	ICAM1
GW768505A GSK	0.0308037	0.116749	34.6372	120.541	RET
EMETINE CTD 00005892	0.0308037	0.116749	34.6372	120.541	IL6R
carnosol CTD 00002718	0.0308037	0.116749	34.6372	120.541	ICAM1
mebendazole CTD 00006249	0.0308037	0.116749	34.6372	120.541	IL6R
lasalocid PC3 UP	0.0308037	0.116749	34.6372	120.541	ICAM1
lycorine MCF7 DOWN	0.0308037	0.116749	34.6372	120.541	RET
nifuroxazide HL60 DOWN	0.0308037	0.116749	34.6372	120.541	ARG1
Hydroxytyrosol CTD 00000267	0.0308037	0.116749	34.6372	120.541	ICAM1
phosphate CTD 00006536	0.0308037	0.116749	34.6372	120.541	GAS6
CHRYSENE CTD 00001482	0.0308037	0.116749	34.6372	120.541	ICAM1
putrescine BOSS	0.0308037	0.116749	34.6372	120.541	SHBG
Aliskiren BOSS	0.0308037	0.116749	34.6372	120.541	SHBG
irbesartan BOSS	0.0308037	0.116749	34.6372	120.541	SHBG
cytochalasin D BOSS	0.0308037	0.116749	34.6372	120.541	ICAM1
Spermine tetrahydrochloride BOSS	0.0308037	0.116749	34.6372	120.541	SHBG
progesterone BOSS	0.0308619	0.116749	7.84435	27.2845	SHBG;ICAM1
POTASSIUM DICHROMATE CTD 00006598	0.0312133	0.116749	4.78925	16.6039	NCAN;TGFBI;ICAM1
[6-[6-(butanoylamino)purin-9-yl]-2-hydroxy-2-oxo-4a,6,7,7a-tetrahydro-4H-furo[3,2-d][1,3,2]dioxaphosphinin-7-yl] butanoate CTD 00005796	0.0316355	0.116749	7.73717	26.7201	RET;ICAM1
aspirin CTD 00005447	0.0319339	0.116749	4.74511	16.3426	APOE;GAS6;ICAM1
estradiol	0.0320167	0.116749	33.25	114.43	SHBG
XMD-12 LINCS	0.0320167	0.116749	33.25	114.43	RET
ILORASERTIB Roche	0.0320167	0.116749	33.25	114.43	RET
KIN001-123/WZ-1-84 LINCS	0.0320167	0.116749	33.25	114.43	RET
amprolium PC3 UP	0.0320167	0.116749	33.25	114.43	ERAP1
Olmesartan BOSS	0.0320167	0.116749	33.25	114.43	SHBG
metoprolol BOSS	0.0320167	0.116749	33.25	114.43	SHBG
Anacardic acid C15:3 CTD 00003117	0.0320167	0.116749	33.25	114.43	ICAM1
LY 294002 CTD 00003061	0.0324169	0.116749	7.63285	26.1736	GSS;ICAM1
vinblastine CTD 00006986	0.0324169	0.116749	7.63285	26.1736	PLAU;ICAM1
pyrimethamine CTD 00006670	0.0332283	0.116749	31.9696	108.836	HEXB
60282-87-3 CTD 00001598	0.0332283	0.116749	31.9696	108.836	SHBG
2,6,9,9-tetramethylcycloundeca-2,6,10-trien-1-one CTD 00003763	0.0332283	0.116749	31.9696	108.836	ICAM1
Evodiamine CTD 00002158	0.0332283	0.116749	31.9696	108.836	ICAM1
niclosamide MCF7 DOWN	0.0332283	0.116749	31.9696	108.836	RET
AC1L1KON CTD 00000061	0.0332283	0.116749	31.9696	108.836	ICAM1
alpha-D-Mannose TTD 00001913	0.0332283	0.116749	31.9696	108.836	IL6R
sulfasalazine BOSS	0.0332283	0.116749	31.9696	108.836	ICAM1
pentoxifylline BOSS	0.0332283	0.116749	31.9696	108.836	ICAM1
aminoguanidine BOSS	0.0332283	0.116749	31.9696	108.836	SHBG
Ademetionine CTD 00006715	0.0332283	0.116749	31.9696	108.836	GSS
LITHIUM CHLORIDE CTD 00007226	0.0334705	0.116749	7.49801	25.4714	PLAU;ICAM1
ethanol CTD 00005337	0.0334705	0.116749	7.49801	25.4714	SHBG;ICAM1
NICKEL SULFATE CTD 00001417	0.0341489	0.116749	4.61733	15.5928	PLAU;APOE;ICAM1
Aflodac CTD 00006817	0.0342696	0.116749	7.39993	24.9636	RET;ICAM1
Pazopanib hydrochloride	0.0344384	0.116749	30.784	103.698	RET
PEPCID CTD 00007086	0.0344384	0.116749	30.784	103.698	ICAM1
Digoxigenin CTD 00005824	0.0344384	0.116749	30.784	103.698	IL6R
isotretinoin MCF7 UP	0.0344384	0.116749	30.784	103.698	TGFBI
cerivastatin CTD 00003073	0.0344384	0.116749	30.784	103.698	ICAM1
15442-64-5 CTD 00000915	0.0344384	0.116749	30.784	103.698	ICAM1
PROPIDIUM CTD 00006632	0.0344384	0.116749	30.784	103.698	IL6R
thiotepa CTD 00006869	0.0344384	0.116749	30.784	103.698	ERAP1
58-64-0 CTD 00005321	0.0344384	0.116749	30.784	103.698	GAS6
Epirubicin CTD 00007057	0.0344384	0.116749	30.784	103.698	IL6R
gemcitabine CTD 00002382	0.0345377	0.116749	7.36779	24.7978	PLAU;ICAM1
Kinome 635 Roche	0.035647	0.118174	29.683	98.9659	RET
butyl hydroxybenzoate PC3 DOWN	0.035647	0.118174	29.683	98.9659	PLAU
ICN 1229 CTD 00006697	0.035647	0.118174	29.683	98.9659	ICAM1
lanatoside C CTD 00000952	0.035647	0.118174	29.683	98.9659	IL6R
withaferin A PC3 DOWN	0.035647	0.118174	29.683	98.9659	PLAU
D-MONAPTERIN BOSS	0.035647	0.118174	29.683	98.9659	ICAM1
tretinoin HL60 UP	0.0361633	0.118186	7.18064	23.8377	ARG1;ICAM1
danazol	0.0368542	0.118186	28.658	94.5941	SHBG
GW843682 LINCS	0.0368542	0.118186	28.658	94.5941	RET
Indirubin Derivative E804 RBC	0.0368542	0.118186	28.658	94.5941	RET
Digitoxigenin CTD 00005821	0.0368542	0.118186	28.658	94.5941	IL6R
OLEANOLIC ACID CTD 00006433	0.0368542	0.118186	28.658	94.5941	ICAM1
succinylsulfathiazole PC3 DOWN	0.0368542	0.118186	28.658	94.5941	ERAP1
1'-Acetoxychavicol acetate CTD 00002113	0.0368542	0.118186	28.658	94.5941	ICAM1
DESOGESTREL CTD 00007143	0.0368542	0.118186	28.658	94.5941	APOE
stearic acid BOSS	0.0368542	0.118186	28.658	94.5941	ICAM1
cytarabine CTD 00005743	0.0369115	0.118186	4.47254	14.756	TGFBR3;FCGR2A;SVEP1
AG1478 LINCS	0.03806	0.11927	27.7014	90.5446	RET
CHIR-265/RAF-265 Kinome Scan	0.03806	0.11927	27.7014	90.5446	RET
CI-1033 Kinome Scan	0.03806	0.11927	27.7014	90.5446	RET
Gly-His-Lys PC3 UP	0.03806	0.11927	27.7014	90.5446	PLAU
2,4-Diisocyanato-1-methylbenzene CTD 00006908	0.03806	0.11927	27.7014	90.5446	ICAM1
peptidoglycan CTD 00006490	0.03806	0.11927	27.7014	90.5446	ICAM1
ranitidine CTD 00006691	0.03806	0.11927	27.7014	90.5446	ICAM1
sodium fluoride CTD 00006755	0.0392642	0.121566	26.8065	86.7843	ICAM1
27-hydroxycholesterol CTD 00002877	0.0392642	0.121566	26.8065	86.7843	ICAM1
1,6-Diisocyanatohexane CTD 00000793	0.0392642	0.121566	26.8065	86.7843	ICAM1
minocycline CTD 00006338	0.0392642	0.121566	26.8065	86.7843	IL6R
alsterpaullone MCF7 UP	0.0403552	0.123437	6.75145	21.6724	MANBA;APOE
Regorafenib FDA	0.0404671	0.123437	25.9674	83.2845	RET
flutamide CTD 00005995	0.0404671	0.123437	25.9674	83.2845	GAS6
fentanyl BOSS	0.0404671	0.123437	25.9674	83.2845	SHBG
phthalic acid BOSS	0.0404671	0.123437	25.9674	83.2845	SHBG
Xanthohumol CTD 00003425	0.0416685	0.123796	25.1793	80.0201	ICAM1
diazepam CTD 00005789	0.0416685	0.123796	25.1793	80.0201	TGFBR3
bisacodyl PC3 UP	0.0416685	0.123796	25.1793	80.0201	IL6R
Geranylgeranyl pyrophosphate CTD 00000102	0.0416685	0.123796	25.1793	80.0201	ICAM1
geldanamycin MCF7 DOWN	0.0416685	0.123796	25.1793	80.0201	RET
fluticasone CTD 00002635	0.0416685	0.123796	25.1793	80.0201	ICAM1
SU9516 TTD 00011110	0.0416685	0.123796	25.1793	80.0201	RET
SU 5416 TTD 00011104	0.0416685	0.123796	25.1793	80.0201	RET
(-)-Epigallocatechin gallate CTD 00002033	0.0421648	0.123796	2.67657	8.47448	TGFBR3;PLAU;GSS;APOE;TGFBI;ICAM1
Erlotinib FDA	0.0428684	0.123796	24.4375	76.9688	RET
Ki-20227 Kinome Scan	0.0428684	0.123796	24.4375	76.9688	RET
Erlotinib Kinome Scan	0.0428684	0.123796	24.4375	76.9688	RET
warfarin CTD 00005716	0.0428684	0.123796	24.4375	76.9688	APOE
Methylbenzethonium chloride CTD 00000197	0.0428684	0.123796	24.4375	76.9688	IL6R
oxozinc CTD 00007012	0.0428684	0.123796	24.4375	76.9688	ICAM1
Fenbuconazole CTD 00004512	0.0428684	0.123796	24.4375	76.9688	ICAM1
Vandetanib CTD 00004046	0.0428684	0.123796	24.4375	76.9688	RET
estrone BOSS	0.0428684	0.123796	24.4375	76.9688	SHBG
tolnaftate PC3 UP	0.0432483	0.123796	6.49242	20.3914	FCGR2A;SVEP1
6-Mercaptopurine CTD 00007042	0.0440669	0.123796	23.7381	74.1114	GSS
BIRB-796 Kinome Scan	0.0440669	0.123796	23.7381	74.1114	RET
BAS-012416453 PC3 DOWN	0.0440669	0.123796	23.7381	74.1114	PLAU
Destruxin B CTD 00001859	0.0440669	0.123796	23.7381	74.1114	PLAU
fenbendazole MCF7 UP	0.0440669	0.123796	23.7381	74.1114	ICAM1
harmol PC3 DOWN	0.0440669	0.123796	23.7381	74.1114	PLAU
Luronit CTD 00006106	0.0440669	0.123796	23.7381	74.1114	PLAU
Phytomenadione BOSS	0.0440669	0.123796	23.7381	74.1114	GAS6
candesartan BOSS	0.0440669	0.123796	23.7381	74.1114	SHBG
su6656 TTD 00011109	0.0440669	0.123796	23.7381	74.1114	RET
ethinyl estradiol	0.045264	0.124446	23.0775	71.4306	SHBG
progesterone	0.045264	0.124446	23.0775	71.4306	SHBG
Kinome 1194 Roche	0.045264	0.124446	23.0775	71.4306	RET
2,2',5,5'-TETRACHLOROBIPHENYL CTD 00000481	0.045264	0.124446	23.0775	71.4306	APOE
ivermectin MCF7 UP	0.045264	0.124446	23.0775	71.4306	ICAM1
Romidepsin CTD 00003096	0.045264	0.124446	23.0775	71.4306	ICAM1
sodium benzoate BOSS	0.045264	0.124446	23.0775	71.4306	SHBG
Tenofovir BOSS	0.045264	0.124446	23.0775	71.4306	ICAM1
azacyclonol HL60 UP	0.0459174	0.124739	6.27552	19.3343	RET;NCAN
troglitazone CTD 00002415	0.0464053	0.124739	4.06713	12.4875	PLAU;APOE;ICAM1
Beryllium sulfate CTD 00001005	0.0464596	0.124739	22.4527	68.9112	ICAM1
Nilotinib Kinome Scan	0.0464596	0.124739	22.4527	68.9112	RET
15-delta prostaglandin J2 MCF7 DOWN	0.0464596	0.124739	22.4527	68.9112	RET
362-05-0 CTD 00000041	0.0464596	0.124739	22.4527	68.9112	SHBG
Ephedrone CTD 00002112	0.0464596	0.124739	22.4527	68.9112	CRTAM
Lidocaine hydrochloride BOSS	0.0464596	0.124739	22.4527	68.9112	ICAM1
2-Naphthoxyacetic acid BOSS	0.0464596	0.124739	22.4527	68.9112	PLAU
Barasertib LINCS	0.0476538	0.125334	21.8607	66.5396	RET
Nilotinib FDA	0.0476538	0.125334	21.8607	66.5396	RET
Axitinib FDA	0.0476538	0.125334	21.8607	66.5396	RET
AG-013736 Kinome Scan	0.0476538	0.125334	21.8607	66.5396	RET
erythromycin CTD 00005916	0.0476538	0.125334	21.8607	66.5396	ICAM1
spermidine BOSS	0.0476538	0.125334	21.8607	66.5396	SHBG
ethinyl estradiol BOSS	0.0476538	0.125334	21.8607	66.5396	SHBG
Fasudil hydrochloride BOSS	0.0476538	0.125334	21.8607	66.5396	ICAM1
verteporfin HL60 DOWN	0.0483404	0.126817	6.09438	18.4629	HEXB;IL6R
VALPROIC ACID CTD 00006977	0.0485876	0.127142	2.11125	6.38522	RET;VIT;WWOX;MANBA;HEXB;NCAN;ERAP1;ICAM1;TGFBR3;PLAU;APOE;TGFBI;GAS6;IL6R;PAM
mebendazole MCF7 UP	0.0488466	0.127174	21.2991	64.3036	TGFBI
Bandrowski's base CTD 00002216	0.0488466	0.127174	21.2991	64.3036	ICAM1
irinotecan MCF7 UP	0.0500015	0.128651	3.94128	11.8069	PLAU;TGFBI;GAS6
benzethonium chloride CTD 00005485	0.0500379	0.128651	20.7656	62.1925	IL6R
Esculetin CTD 00000358	0.0500379	0.128651	20.7656	62.1925	ERAP1
FLUORANTHENE CTD 00000365	0.0500379	0.128651	20.7656	62.1925	ICAM1
methylglyoxal BOSS	0.0500379	0.128651	20.7656	62.1925	ICAM1
Sorafenib tosylate	0.0512278	0.128819	20.2581	60.1965	RET
STOCK1N-35215 MCF7 DOWN	0.0512278	0.128819	20.2581	60.1965	RET
amantadine PC3 DOWN	0.0512278	0.128819	20.2581	60.1965	ERAP1
Telmisartan CTD 00003021	0.0512278	0.128819	20.2581	60.1965	ICAM1
astemizole CTD 00007123	0.0512278	0.128819	20.2581	60.1965	ICAM1
CHEMBL402761 BOSS	0.0512278	0.128819	20.2581	60.1965	PLAU
N-Formyl-Met-Leu-Phe BOSS	0.0512278	0.128819	20.2581	60.1965	ICAM1
Enalapril maleate BOSS	0.0512278	0.128819	20.2581	60.1965	SHBG
Acteoside CTD 00002463	0.0512278	0.128819	20.2581	60.1965	ICAM1
ajmaline HL60 UP	0.0517477	0.129595	5.86152	17.3582	RET;SVEP1
Sorafenib Kinome Scan	0.0524162	0.129595	19.7748	58.3068	RET
ABT-869 Kinome Scan	0.0524162	0.129595	19.7748	58.3068	RET
olanzapine CTD 00002854	0.0524162	0.129595	19.7748	58.3068	SHBG
1,3,5[10]-Estratriene-3,4,17 beta-triol CTD 00000733	0.0524162	0.129595	19.7748	58.3068	SHBG
levamisole BOSS	0.0524162	0.129595	19.7748	58.3068	ICAM1
Cetrorelix CTD 00002564	0.0524162	0.129595	19.7748	58.3068	APOE
3-methylcholanthrene CTD 00006310	0.0526919	0.129965	5.80103	17.0741	PLAU;CHRDL2
METHACYCLINE HYDROCHLORIDE	0.0536033	0.130035	19.314	56.5154	ERAP1
ZM-447439 LINCS	0.0536033	0.130035	19.314	56.5154	RET
etynodiol HL60 DOWN	0.0536033	0.130035	19.314	56.5154	ICAM1
STYRENE CTD 00001125	0.0536033	0.130035	19.314	56.5154	TGFBR3
Acetovanillone CTD 00002374	0.0536033	0.130035	19.314	56.5154	ICAM1
nicotinic acid BOSS	0.0536033	0.130035	19.314	56.5154	ICAM1
CHEMBL521784 BOSS	0.0536033	0.130035	19.314	56.5154	ICAM1
22-Hydroxycholesterol CTD 00000121	0.0547889	0.130456	18.8741	54.8153	ICAM1
PKR Inhibitor RBC	0.0547889	0.130456	18.8741	54.8153	RET
dorsomorphin CTD 00004649	0.0547889	0.130456	18.8741	54.8153	ICAM1
SU11652 RBC	0.0547889	0.130456	18.8741	54.8153	RET
capsazepine CTD 00002764	0.0547889	0.130456	18.8741	54.8153	ICAM1
Acridine orange BOSS	0.0547889	0.130456	18.8741	54.8153	ICAM1
Bazedoxifene CTD 00004022	0.0547889	0.130456	18.8741	54.8153	IL6R
vitamin B12 BOSS	0.0547889	0.130456	18.8741	54.8153	APOE
simvastatin CTD 00007319	0.0549191	0.130465	5.66456	16.4379	APOE;ICAM1
AZD-2171 Kinome Scan	0.0559731	0.131155	18.4537	53.1999	RET
benzocaine PC3 UP	0.0559731	0.131155	18.4537	53.1999	SVEP1
DEHP CTD 00005816	0.0559731	0.131155	18.4537	53.1999	HEXB
Idose BOSS	0.0559731	0.131155	18.4537	53.1999	SHBG
2-deoxy-D-glucose BOSS	0.0559731	0.131155	18.4537	53.1999	PLAU
CHROMIUM BOSS	0.0559731	0.131155	18.4537	53.1999	ICAM1
mitomycin C CTD 00007136	0.0562069	0.131404	5.58937	16.0902	PLAU;TGFBI
benserazide PC3 UP	0.0571558	0.131829	18.0516	51.6633	ERAP1
p-benzoquinone CTD 00000148	0.0571558	0.131829	18.0516	51.6633	GSS
mitotane CTD 00006344	0.0571558	0.131829	18.0516	51.6633	SHBG
loxapine PC3 UP	0.0571558	0.131829	18.0516	51.6633	ICAM1
Ursolic acid CTD 00000232	0.0571558	0.131829	18.0516	51.6633	ICAM1
AMILORIDE CTD 00005369	0.0571558	0.131829	18.0516	51.6633	PLAU
pergolide HL60 UP	0.0575054	0.132339	5.51613	15.7534	MANBA;FCGR2A
BUTHIONINE SULFOXIMINE CTD 00007280	0.0583371	0.132772	17.6667	50.2001	ICAM1
pizotifen PC3 UP	0.0583371	0.132772	17.6667	50.2001	ICAM1
OZONE BOSS	0.0583371	0.132772	17.6667	50.2001	ICAM1
androstenedione BOSS	0.0583371	0.132772	17.6667	50.2001	SHBG
lansoprazole CTD 00007481	0.0583371	0.132772	17.6667	50.2001	APOE
N-Acetyl-L-cysteine CTD 00005305	0.0584863	0.132818	5.46243	15.5076	PLAU;ICAM1
Pazopanib FDA	0.059517	0.133396	17.2977	48.8055	RET
Go 6976 RBC	0.059517	0.133396	17.2977	48.8055	RET
Pazopanib Kinome Scan	0.059517	0.133396	17.2977	48.8055	RET
progesterone HL60 DOWN	0.059517	0.133396	17.2977	48.8055	ARG1
mycophenolic acid BOSS	0.059517	0.133396	17.2977	48.8055	ICAM1
Platelet activating factor BOSS	0.059517	0.133396	17.2977	48.8055	ICAM1
oxytetracycline CTD 00006459	0.0606955	0.134286	16.9439	47.4748	IL6R
Cabozantinib FDA	0.0606955	0.134286	16.9439	47.4748	RET
506-26-3 CTD 00007216	0.0606955	0.134286	16.9439	47.4748	HEXB
geldanamycin CTD 00000033	0.0606955	0.134286	16.9439	47.4748	PLAU
caffeic acid BOSS	0.0606955	0.134286	16.9439	47.4748	ICAM1
methacholine BOSS	0.0606955	0.134286	16.9439	47.4748	ICAM1
5155877 MCF7 UP	0.0618726	0.13515	16.6042	46.204	IL6R
VERAPAMIL CTD 00006985	0.0618726	0.13515	16.6042	46.204	RET
apigenin MCF7 UP	0.0618726	0.13515	16.6042	46.204	RET
MK 886 CTD 00002517	0.0618726	0.13515	16.6042	46.204	PLAU
parthenolide CTD 00000087	0.0618726	0.13515	16.6042	46.204	ICAM1
Chalcone BOSS	0.0618726	0.13515	16.6042	46.204	ICAM1
securinine PC3 UP	0.0630483	0.136848	16.2778	44.9894	IL6R
isoflurane BOSS	0.0630483	0.136848	16.2778	44.9894	ICAM1
ethopropazine BOSS	0.0630483	0.136848	16.2778	44.9894	PLAU
Melitten CTD 00006261	0.0642225	0.138522	15.9639	43.8274	ICAM1
HELENALIN CTD 00000035	0.0642225	0.138522	15.9639	43.8274	ICAM1
Cyclohexanecarboxamide, 4-(1-aminoethyl)-N-4-pyridinyl-, trans- CTD 00003513	0.0642225	0.138522	15.9639	43.8274	ICAM1
trichostatin A CTD 00000660	0.0645149	0.138862	2.15805	5.9149	RET;TGFBR3;WWOX;PLAU;NCAN;ERAP1;TGFBI;IL6R
2,4-Dinitrofluorobenzene CTD 00005849	0.0653953	0.139881	15.6619	42.7149	ICAM1
Indole-3-carbinol CTD 00000845	0.0653953	0.139881	15.6619	42.7149	PLAU
PRASTERONE BOSS	0.0653953	0.139881	15.6619	42.7149	SHBG
nicotinic acid CTD 00006387	0.0665667	0.140062	15.3711	41.6489	ICAM1
azathioprine CTD 00005457	0.0665667	0.140062	15.3711	41.6489	GSS
Vandetanib Kinome Scan	0.0665667	0.140062	15.3711	41.6489	RET
Vandetanib FDA	0.0665667	0.140062	15.3711	41.6489	RET
H-7 PC3 UP	0.0665667	0.140062	15.3711	41.6489	TGFBI
atovaquone HL60 DOWN	0.0665667	0.140062	15.3711	41.6489	ARG1
zidovudine PC3 UP	0.0665667	0.140062	15.3711	41.6489	ERAP1
Rosuvastatin BOSS	0.0665667	0.140062	15.3711	41.6489	ICAM1
Sorafenib LINCS	0.0677367	0.1408	15.0909	40.6266	RET
AZ-628 LINCS	0.0677367	0.1408	15.0909	40.6266	RET
chenodeoxycholic acid CTD 00005623	0.0677367	0.1408	15.0909	40.6266	ICAM1
nilutamide PC3 UP	0.0677367	0.1408	15.0909	40.6266	ERAP1
pentachlorophenol CTD 00006479	0.0677367	0.1408	15.0909	40.6266	SHBG
mitoxantrone TTD 00009332	0.0677367	0.1408	15.0909	40.6266	ERAP1
Paricalcitol CTD 00003033	0.0689053	0.142766	14.8207	39.6457	APOE
mebendazole HL60 UP	0.0689599	0.142766	4.96234	13.2704	FCGR2A;ICAM1
Tyrphostin B42 CTD 00003234	0.0700725	0.143914	14.5599	38.7036	ICAM1
Puerarin CTD 00001616	0.0700725	0.143914	14.5599	38.7036	ICAM1
nocodazole CTD 00007087	0.0700725	0.143914	14.5599	38.7036	IL6R
alpha-Tocopherol CTD 00007387	0.0700725	0.143914	14.5599	38.7036	ICAM1
5-azacytidine CTD 00005455	0.0710553	0.145152	4.87578	12.893	RET;IL6R
sulfasalazine CTD 00006719	0.0712383	0.145152	14.3082	37.7983	ICAM1
PONATINIB CTD 00004976	0.0712383	0.145152	14.3082	37.7983	RET
lovastatin BOSS	0.0712383	0.145152	14.3082	37.7983	ICAM1
cicloheximide MCF7 UP	0.0717585	0.145858	4.84758	12.7707	PLAU;ICAM1
Sorafenib FDA	0.0724027	0.145858	14.065	36.9277	RET
H-89 PC3 DOWN	0.0724027	0.145858	14.065	36.9277	PLAU
STOCK1N-35215 MCF7 UP	0.0724027	0.145858	14.065	36.9277	IL6R
STOCK1N-35696 PC3 DOWN	0.0724027	0.145858	14.065	36.9277	PLAU
INCB18424 Kinome Scan	0.0735657	0.145858	13.8299	36.0901	RET
cimetidine CTD 00005672	0.0735657	0.145858	13.8299	36.0901	ICAM1
tamoxifen MCF7 UP	0.0735657	0.145858	13.8299	36.0901	ICAM1
DEOXYCHOLIC ACID CTD 00005765	0.0735657	0.145858	13.8299	36.0901	ICAM1
MPTP BOSS	0.0735657	0.145858	13.8299	36.0901	PLAU
Electrocorundum CTD 00005364	0.0735657	0.145858	13.8299	36.0901	ICAM1
Sodium dodecyl sulfate BOSS	0.0735657	0.145858	13.8299	36.0901	SHBG
Propranolol hydrochloride BOSS	0.0735657	0.145858	13.8299	36.0901	ICAM1
taurine BOSS	0.0735657	0.145858	13.8299	36.0901	PLAU
cefotiam PC3 UP	0.0747273	0.14703	13.6025	35.2836	ERAP1
Chromium(III) oxide CTD 00001091	0.0747273	0.14703	13.6025	35.2836	RET
dipyridamole BOSS	0.0747273	0.14703	13.6025	35.2836	PLAU
DL-Methamphetamine BOSS	0.0747273	0.14703	13.6025	35.2836	PLAU
MERCURY CTD 00006274	0.0753091	0.147345	4.71127	12.1841	GSS;APOE
arsenite CTD 00000779	0.0755599	0.147345	2.7453	7.09063	SVEP1;ICAM5;TGFBI;PAM
Ruxolitinib FDA	0.0758875	0.147345	13.3824	34.5065	RET
Dibenziodolium CTD 00000351	0.0758875	0.147345	13.3824	34.5065	ICAM1
digoxin CTD 00005825	0.0758875	0.147345	13.3824	34.5065	IL6R
Androstanolone BOSS	0.0758875	0.147345	13.3824	34.5065	SHBG
valsartan CTD 00002971	0.0758875	0.147345	13.3824	34.5065	APOE
arecoline CTD 00005439	0.0770463	0.147923	13.1693	33.7575	GSS
PHA-665752 Kinome Scan	0.0770463	0.147923	13.1693	33.7575	RET
JWE-035 LINCS	0.0770463	0.147923	13.1693	33.7575	RET
enoxaparin CTD 00006081	0.0770463	0.147923	13.1693	33.7575	FCGR2A
mycophenolate mofetil BOSS	0.0770463	0.147923	13.1693	33.7575	ICAM1
MINOCYCLINE HYDROCHLORIDE BOSS	0.0770463	0.147923	13.1693	33.7575	ICAM1
AFLATOXIN B1 CTD 00007128	0.0780468	0.149035	2.13813	5.45319	WWOX;PLAU;ARG1;APOE;SHBG;IL6R;ICAM1
DL-Mevalonic acid CTD 00006329	0.0782036	0.149035	12.9629	33.0351	ICAM1
Mangiferin CTD 00000713	0.0782036	0.149035	12.9629	33.0351	ICAM1
SODIUM SULFATE BOSS	0.0782036	0.149035	12.9629	33.0351	ICAM1
sulfaguanidine PC3 UP	0.0784018	0.149137	3.24312	8.25669	FCGR2A;SVEP1;APOE
Nilotinib	0.0793596	0.149853	12.7628	32.338	RET
h-89 CTD 00002586	0.0793596	0.149853	12.7628	32.338	APOE
Silybin CTD 00003999	0.0793596	0.149853	12.7628	32.338	PLAU
MERCURY BOSS	0.0793596	0.149853	12.7628	32.338	SHBG
cicloheximide PC3 UP	0.0803746	0.150109	4.53261	11.427	PLAU;IL6R
Chromium(II) chloride CTD 00000877	0.0805143	0.150109	12.5688	31.6649	RET
beclomethasone CTD 00005468	0.0805143	0.150109	12.5688	31.6649	ICAM1
staurosporine BOSS	0.0805143	0.150109	12.5688	31.6649	PLAU
Clopidogrel bisulfate BOSS	0.0805143	0.150109	12.5688	31.6649	ICAM1
thalidomide BOSS	0.0805143	0.150109	12.5688	31.6649	ICAM1
FITC BOSS	0.0805143	0.150109	12.5688	31.6649	ICAM1
benzo[a]pyrene CTD 00005488	0.0810103	0.150669	1.98245	4.98224	VIT;TGFBR3;WWOX;PLAU;ARG1;HEXB;SHBG;IL6R;ICAM1
ampyrone HL60 UP	0.081107	0.150669	4.50817	11.3245	RET;ERAP1
histamine CTD 00006100	0.0816675	0.150895	12.3806	31.0146	ICAM1
deptropine PC3 UP	0.0816675	0.150895	12.3806	31.0146	ICAM1
ebselen TTD 00007775	0.0816675	0.150895	12.3806	31.0146	ERAP1
Tetradioxin CTD 00006848	0.0823703	0.151921	2.02941	5.06649	RET;TGFBR3;PLAU;ARG1;APOE;TGFBI;PAM;ICAM1
triclosan CTD 00006933	0.0828193	0.152476	12.1979	30.3862	PLAU
progesterone CTD 00006624	0.0846626	0.155592	2.36453	5.83821	PLAU;CRTAM;GAS6;IL6R;ICAM1
nitrofural PC3 UP	0.0851188	0.155875	11.8482	29.1905	ERAP1
PHOSPHINE CTD 00006547	0.0851188	0.155875	11.8482	29.1905	APOE
Sodium dodecyl sulfate CTD 00006753	0.0862665	0.156862	11.6808	28.6215	ICAM1
baicalein CTD 00000302	0.0862665	0.156862	11.6808	28.6215	PLAU
chlorpromazine PC3 UP	0.0862665	0.156862	11.6808	28.6215	ICAM1
PARAOXON CTD 00006470	0.0862665	0.156862	11.6808	28.6215	GSS
nimesulide CTD 00000666	0.0874128	0.158388	11.5179	28.0705	ICAM1
benzocaine PC3 DOWN	0.0874128	0.158388	11.5179	28.0705	ERAP1
DMBA CTD 00007046	0.0885577	0.159621	11.3596	27.5368	PLAU
dipyridamole CTD 00005856	0.0885577	0.159621	11.3596	27.5368	APOE
indole-3-acetic acid BOSS	0.0885577	0.159621	11.3596	27.5368	SHBG
AC1L1FUW CTD 00002630	0.0908434	0.162603	11.0556	26.5181	APOE
tanespimycin HL60 UP	0.0908434	0.162603	11.0556	26.5181	FCGR2A
withaferin A MCF7 UP	0.0908434	0.162603	11.0556	26.5181	IL6R
epoprostenol BOSS	0.0908434	0.162603	11.0556	26.5181	ICAM1
alprostadil HL60 UP	0.0919606	0.164076	4.18075	9.97692	MANBA;PAM
A-674563 Kinome Scan	0.0919841	0.164076	10.9095	26.0317	RET
rosiglitazone CTD 00003139	0.0927246	0.164966	4.15988	9.8927	APOE;ICAM1
Cianidanol CTD 00005600	0.0928336	0.164966	3.00535	7.14355	PLAU;ERAP1;ICAM1
Bosutinib LINCS	0.0931235	0.164966	10.7673	25.5598	RET
3,4-Dihydro-2-phenyl-2H-1-benzopyran-3,4-diol BOSS	0.0931235	0.164966	10.7673	25.5598	ICAM1
Pentabromodiphenyl ether CTD 00003077	0.0942585	0.16556	4.11875	9.72731	APOE;ICAM1
clonidine HL60 UP	0.0942616	0.16556	10.6287	25.1017	FCGR2A
temozolomide BOSS	0.0942616	0.16556	10.6287	25.1017	WWOX
rotenone BOSS	0.0942616	0.16556	10.6287	25.1017	PLAU
diphenhydramine BOSS	0.0942616	0.16556	10.6287	25.1017	PLAU
Kinome 3629 Roche	0.0953982	0.166422	10.4937	24.6569	RET
geldanamycin HL60 UP	0.0953982	0.166422	10.4937	24.6569	FCGR2A
hesperadin TTD 00008420	0.0953982	0.166422	10.4937	24.6569	RET
Gallic acid BOSS	0.0953982	0.166422	10.4937	24.6569	ICAM1
ebselen CTD 00001949	0.0965335	0.167271	10.362	24.2249	ERAP1
bromocriptine HL60 UP	0.0965335	0.167271	10.362	24.2249	FCGR2A
ellipticine PC3 UP	0.0965335	0.167271	10.362	24.2249	ICAM1
2'-Deoxy cyclic AMP BOSS	0.0965335	0.167271	10.362	24.2249	ICAM1
KIN001-220 LINCS	0.0976675	0.167546	10.2335	23.8051	RET
Dasatinib Kinome Scan	0.0976675	0.167546	10.2335	23.8051	RET
Dasatinib FDA	0.0976675	0.167546	10.2335	23.8051	RET
dihydroergocristine HL60 UP	0.0976675	0.167546	10.2335	23.8051	MANBA
gabexate PC3 UP	0.0976675	0.167546	10.2335	23.8051	SVEP1
ebselen BOSS	0.0976675	0.167546	10.2335	23.8051	ERAP1
Zoledronic acid CTD 00003127	0.0981263	0.167814	4.01932	9.33086	PLAU;ICAM1
bay 11-7082 CTD 00003959	0.0988	0.167814	10.1082	23.3971	ICAM1
Palbociclib FDA	0.0988	0.167814	10.1082	23.3971	RET
PD0332991 LINCS	0.0988	0.167814	10.1082	23.3971	RET
SB 218078 RBC	0.0988	0.167814	10.1082	23.3971	RET
silibinin BOSS	0.0988	0.167814	10.1082	23.3971	ICAM1
Lead(II) acetate CTD 00000394	0.0999312	0.168303	9.98594	23.0004	RET
fenoterol HL60 UP	0.0999312	0.168303	9.98594	23.0004	FCGR2A
SILVER CTD 00006742	0.0999312	0.168303	9.98594	23.0004	ICAM1
staurosporine MCF7 UP	0.0999312	0.168303	9.98594	23.0004	RET
172889-27-9 BOSS	0.0999312	0.168303	9.98594	23.0004	ICAM1
anisomycin PC3 UP	0.100068	0.168303	2.90366	6.68396	PLAU;IL6R;ICAM1
MS-275 PC3 UP	0.100469	0.168599	3.96189	9.10405	TGFBR3;TGFBI
zalcitabine PC3 UP	0.100829	0.168599	2.89352	6.63867	TREML2;SVEP1;ICAM5
Adenosine triphosphate CTD 00005324	0.101061	0.168599	9.86657	22.6145	ICAM1
Idocyklin BOSS	0.101061	0.168599	9.86657	22.6145	PLAU
acetoacetic acid BOSS	0.101061	0.168599	9.86657	22.6145	ICAM1
primaquine PC3 UP	0.101647	0.168842	3.93378	8.99361	SVEP1;IL6R
deptropine HL60 DOWN	0.10204	0.168842	3.92449	8.95722	PLAU;IL6R
chitosamine CTD 00006030	0.10219	0.168842	9.75	22.239	ICAM1
WH-4-025 LINCS	0.10219	0.168842	9.75	22.239	RET
Spectrum 001666 CTD 00000796	0.10219	0.168842	9.75	22.239	ICAM1
NADP(+) BOSS	0.10219	0.168842	9.75	22.239	ICAM1
carbamazepine CTD 00005574	0.102434	0.168975	3.91525	8.92104	SHBG;ICAM1
VX-680/MK-0457 Kinome Scan	0.103317	0.169617	9.63614	21.8736	RET
felodipine MCF7 UP	0.103317	0.169617	9.63614	21.8736	ICAM1
Pioglitazone BOSS	0.103317	0.169617	9.63614	21.8736	SHBG
GW-8510 PC3 UP	0.104442	0.170921	9.5249	21.5179	TGFBI
GNF-Pf-4325 CTD 00005408	0.104442	0.170921	9.5249	21.5179	IL6R
Ponatinib FDA	0.10669	0.173497	9.30993	20.834	RET
chrysin CTD 00001976	0.10669	0.173497	9.30993	20.834	ICAM1
fenofibrate CTD 00006620	0.10669	0.173497	9.30993	20.834	ICAM1
dextroamphetamine BOSS	0.10669	0.173497	9.30993	20.834	PLAU
ampicillin CTD 00005394	0.107811	0.174495	9.20602	20.5052	ARG1
pimozide MCF7 UP	0.107811	0.174495	9.20602	20.5052	ICAM1
Eicosapentaenoic acid BOSS	0.107811	0.174495	9.20602	20.5052	ICAM1
pyrvinium MCF7 DOWN	0.108932	0.176032	9.1044	20.1847	RET
chlorzoxazone HL60 UP	0.109999	0.177285	3.74738	8.27155	NCAN;SVEP1
Deguelin CTD 00003487	0.110051	0.177285	9.00498	19.8723	ICAM1
meprobamate BOSS	0.111168	0.178806	8.90771	19.5676	SHBG
Cdk1/2 Inhibitor III RBC	0.112285	0.18032	8.8125	19.2704	RET
thapsigargin BOSS	0.1134	0.180983	8.7193	18.9805	PLAU
DL-PHENYLALANINE BOSS	0.1134	0.180983	8.7193	18.9805	SHBG
tetracycline BOSS	0.1134	0.180983	8.7193	18.9805	PLAU
carbon monoxide BOSS	0.1134	0.180983	8.7193	18.9805	ICAM1
hydrocortisone CTD 00006117	0.114513	0.181915	8.62804	18.6975	ICAM1
phenylephrine BOSS	0.114513	0.181915	8.62804	18.6975	SHBG
apigenin BOSS	0.114513	0.181915	8.62804	18.6975	ICAM1
Omega-3 Fatty Acids BOSS	0.115625	0.1834	8.53866	18.4213	ICAM1
alexidine MCF7 UP	0.116736	0.184559	8.45111	18.1516	TGFBI
33258 Hoechst BOSS	0.116736	0.184559	8.45111	18.1516	PLAU
theophylline CTD 00006862	0.116894	0.184559	3.6087	7.74603	WWOX;IL6R
JNJ-28312141 Kinome Scan	0.117846	0.185495	8.36532	17.8882	RET
Hydroxyzine dihydrochloride BOSS	0.117846	0.185495	8.36532	17.8882	ICAM1
celastrol CTD 00002186	0.120061	0.188694	8.19884	17.3795	ICAM1
CHIR-258/TKI-258 Kinome Scan	0.121167	0.190141	8.11806	17.1339	RET
digitoxigenin PC3 UP	0.121415	0.190241	3.52418	7.43088	SVEP1;IL6R
thapsigargin PC3 UP	0.121828	0.190425	3.51669	7.40314	PLAU;ICAM1
A443654 LINCS	0.122271	0.190425	8.03883	16.8937	RET
3,3'-Diindolylmethane CTD 00000841	0.122271	0.190425	8.03883	16.8937	PLAU
phenoxybenzamine PC3 DOWN	0.122271	0.190425	8.03883	16.8937	PLAU
Axitinib	0.123374	0.191564	7.96114	16.659	RET
picrotoxinin HL60 DOWN	0.123374	0.191564	7.96114	16.659	PLAU
buflomedil PC3 DOWN	0.124475	0.192694	7.88492	16.4294	ERAP1
kaempferol CTD 00000297	0.124475	0.192694	7.88492	16.4294	ICAM1
1,10-phenanthroline CTD 00001181	0.125576	0.194106	7.81014	16.2049	ICAM1
4-PHENYLBUTYRIC ACID CTD 00002847	0.126674	0.195511	7.73676	15.9852	GAS6
phenytoin CTD 00006527	0.127772	0.196323	7.66474	15.7703	NCAN
lomustine PC3 DOWN	0.127772	0.196323	7.66474	15.7703	PLAU
celecoxib BOSS	0.127772	0.196323	7.66474	15.7703	ICAM1
butyric acid BOSS	0.128868	0.197713	7.59404	15.5599	PLAU
Dasatinib CTD 00004330	0.129328	0.198124	3.38696	6.92769	PLAU;SVEP1
prenylamine PC3 UP	0.129963	0.198507	7.52462	15.354	ICAM1
rifabutin MCF7 DOWN	0.129963	0.198507	7.52462	15.354	RET
ionomycin CTD 00007090	0.131057	0.199291	7.45646	15.1524	HEXB
apigenin CTD 00007429	0.131057	0.199291	7.45646	15.1524	ICAM1
beta-Levulose BOSS	0.131057	0.199291	7.45646	15.1524	ICAM1
Sorafenib CTD 00004146	0.132149	0.200657	7.38951	14.9551	RET
Glycidamide CTD 00002776	0.13324	0.202016	7.32375	14.7618	WWOX
Healon BOSS	0.13433	0.203369	7.25914	14.5724	ICAM1
resveratrol CTD 00002483	0.135195	0.203819	2.19197	4.38621	RET;PLAU;APOE;ICAM1
Sorafenib	0.135418	0.203819	7.19565	14.3869	RET
PD-173955 Kinome Scan	0.135418	0.203819	7.19565	14.3869	RET
ETHYLENE GLYCOL BOSS	0.135418	0.203819	7.19565	14.3869	PLAU
Vandetanib	0.136505	0.204262	7.13326	14.2051	RET
camptothecin CTD 00005566	0.136505	0.204262	7.13326	14.2051	IL6R
suloctidil MCF7 UP	0.136505	0.204262	7.13326	14.2051	ICAM1
acetaldehyde BOSS	0.136505	0.204262	7.13326	14.2051	PLAU
HG-5-113-01 LINCS	0.137591	0.205291	7.07194	14.027	RET
Ethylene dimethacrylate BOSS	0.137591	0.205291	7.07194	14.027	PLAU
oxygen CTD 00006454	0.138644	0.206015	3.24055	6.40281	PAM;ICAM1
INDOMETHACIN SODIUM BOSS	0.138675	0.206015	7.01165	13.8524	ICAM1
Nandrolone phenpropionate BOSS	0.138675	0.206015	7.01165	13.8524	TGFBR3
CP466722 LINCS	0.139758	0.20673	6.95238	13.6812	RET
luteolin CTD 00007430	0.139758	0.20673	6.95238	13.6812	ICAM1
Deoxycorticosterone acetate BOSS	0.139758	0.20673	6.95238	13.6812	SHBG
PP-242 Kinome Scan	0.14084	0.208032	6.8941	13.5133	RET
cycloheximide BOSS	0.141921	0.209328	6.83678	13.3487	PLAU
niclosamide MCF7 UP	0.143	0.210318	6.7804	13.1873	TGFBI
ARSENIC BOSS	0.143	0.210318	6.7804	13.1873	PLAU
ZINC CTD 00007011	0.14456	0.212275	2.13233	4.12406	PLAU;CRTAM;IL6R;ICAM1
PKC-412 Kinome Scan	0.145154	0.212275	6.67036	12.8735	RET
CGP74514A LINCS	0.145154	0.212275	6.67036	12.8735	RET
oxiglutatione BOSS	0.145154	0.212275	6.67036	12.8735	ICAM1
K-252a, Nocardiopsis sp. RBC	0.14623	0.212942	6.61667	12.7211	RET
azacyclonol MCF7 UP	0.14623	0.212942	6.61667	12.7211	ICAM1
FLUOXETINE HYDROCHLORIDE BOSS	0.14623	0.212942	6.61667	12.7211	PLAU
trichostatin A HL60 DOWN	0.146812	0.213488	3.12368	5.99311	PLAU;IL6R
0297417-0002B PC3 UP	0.147304	0.213901	6.56382	12.5714	ICAM1
AZD4547 LINCS	0.148376	0.214552	6.51181	12.4246	RET
Oxotremorine BOSS	0.148376	0.214552	6.51181	12.4246	ICAM1
L-histidine BOSS	0.148376	0.214552	6.51181	12.4246	SHBG
paclitaxel PC3 UP	0.149448	0.215497	6.46061	12.2804	ERAP1
rosiglitazone BOSS	0.149448	0.215497	6.46061	12.2804	ICAM1
DEOXYNIVALENOL CTD 00000341	0.150518	0.216435	6.41021	12.1388	ICAM1
Chromium(VI) CTD 00002830	0.150518	0.216435	6.41021	12.1388	ICAM1
methazolamide HL60 DOWN	0.151587	0.217668	6.36058	11.9999	RET
colchicine HL60 UP	0.152654	0.218592	6.3117	11.8634	FCGR2A
lindane CTD 00001115	0.152654	0.218592	6.3117	11.8634	SHBG
harmine PC3 DOWN	0.15372	0.219205	6.26357	11.7293	PLAU
tacrolimus BOSS	0.15372	0.219205	6.26357	11.7293	ICAM1
ACRYLAMIDE BOSS	0.15372	0.219205	6.26357	11.7293	SHBG
TG-101348 Kinome Scan	0.154785	0.220419	6.21617	11.5976	RET
COPPER CTD 00005706	0.155384	0.220967	2.06888	3.85196	GSS;ERAP1;SHBG;ICAM1
WH-4-023 LINCS	0.155849	0.221018	6.16947	11.4682	RET
AG-012559 PC3 DOWN	0.155849	0.221018	6.16947	11.4682	PLAU
Irinotecan hydrochloride CTD 00002224	0.156398	0.221492	2.99822	5.56277	TGFBI;PAM
MeIQx CTD 00001739	0.156911	0.221914	6.12346	11.3411	ARG1
thapsigargin MCF7 DOWN	0.157972	0.22306	6.07812	11.2162	RET
vorinostat HL60 DOWN	0.158154	0.22306	2.97646	5.48914	PLAU;IL6R
ursodiol CTD 00006973	0.159032	0.223992	6.03345	11.0934	GSS
ACROLEIN CTD 00005313	0.160091	0.225175	5.98943	10.9727	APOE
thalidomide CTD 00006858	0.162204	0.227217	5.90327	10.7375	ICAM1
Bosutinib FDA	0.162204	0.227217	5.90327	10.7375	RET
daunorubicin PC3 UP	0.162204	0.227217	5.90327	10.7375	ICAM1
BMS-536924,KIN001-126 LINCS	0.163258	0.228385	5.86111	10.6228	RET
R-atenolol PC3 DOWN	0.164312	0.228617	5.81954	10.51	ERAP1
mefloquine MCF7 UP	0.164312	0.228617	5.81954	10.51	ICAM1
CADMIUM BOSS	0.164312	0.228617	5.81954	10.51	PLAU
genistein BOSS	0.164312	0.228617	5.81954	10.51	ICAM1
Dasatinib	0.166415	0.23061	5.73814	10.29	RET
HG-6-64-01 LINCS	0.166415	0.23061	5.73814	10.29	RET
TITANIUM DIOXIDE CTD 00000489	0.166415	0.23061	5.73814	10.29	ICAM1
SU-14813 Kinome Scan	0.167464	0.230823	5.69828	10.1827	RET
fulvestrant PC3 DOWN	0.167464	0.230823	5.69828	10.1827	PLAU
tonzonium bromide PC3 UP	0.167464	0.230823	5.69828	10.1827	IL6R
daunorubicin CTD 00005752	0.167464	0.230823	5.69828	10.1827	IL6R
Crizotinib	0.168513	0.231958	5.65896	10.0772	RET
AST-487 Kinome Scan	0.16956	0.232778	5.62018	9.97329	RET
nifedipine BOSS	0.16956	0.232778	5.62018	9.97329	ICAM1
VANADIUM CTD 00006979	0.170606	0.232973	5.58193	9.87108	PLAU
EXEL-2880/GSK-1363089 Kinome Scan	0.170606	0.232973	5.58193	9.87108	RET
lomustine PC3 UP	0.170606	0.232973	5.58193	9.87108	IL6R
Zinc acetate dihydrate CTD 00007284	0.170606	0.232973	5.58193	9.87108	ICAM1
thioguanosine MCF7 DOWN	0.17165	0.234089	5.54418	9.7705	RET
HC toxin MCF7 DOWN	0.172693	0.23489	5.50694	9.6715	RET
rifabutin PC3 UP	0.172693	0.23489	5.50694	9.6715	TGFBR3
HG-9-91-01 LINCS	0.174776	0.23741	5.43394	9.47814	RET
thioridazine MCF7 UP	0.176854	0.239916	5.36282	9.29073	ICAM1
benzene CTD 00005481	0.178626	0.242002	2.74658	4.73087	TGFBR3;IL6R
N-NITROSODIETHYLAMINE CTD 00005817	0.178926	0.242091	5.29354	9.10901	PLAU
Nintedanib FDA	0.179961	0.242219	5.25955	9.02022	RET
BIBF-1120 (derivative) Kinome Scan	0.179961	0.242219	5.25955	9.02022	RET
PHOSPHINE BOSS	0.179961	0.242219	5.25955	9.02022	SHBG
Pyruvic acid BOSS	0.179961	0.242219	5.25955	9.02022	SHBG
methotrexate CTD 00006299	0.180428	0.242531	2.72821	4.67185	FCGR2A;ICAM1
Cyperquat CTD 00007079	0.180994	0.242659	5.226	8.93276	APOE
oleic acid BOSS	0.180994	0.242659	5.226	8.93276	ICAM1
trichostatin A ssMCF7 DOWN	0.183057	0.245106	5.16016	8.76173	RET
nitroglycerin BOSS	0.184086	0.246165	5.12785	8.67812	SHBG
ammonia BOSS	0.185115	0.246899	5.09594	8.59573	SHBG
Adehl CTD 00006002	0.185115	0.246899	5.09594	8.59573	GAS6
cinnamaldehyde CTD 00000671	0.187167	0.249314	5.03328	8.43454	ICAM1
5-Fluorouracil CTD 00005987	0.187653	0.249639	2.13542	3.5729	TGFBR3;PLAU;TGFBI
gabexate PC3 DOWN	0.188192	0.250033	5.00253	8.35569	ERAP1
emetine MCF7 UP	0.188573	0.250217	2.64841	4.41826	PLAU;ICAM1
acetaminophen BOSS	0.189215	0.250424	4.97214	8.27797	WWOX
DL-METHIONINE BOSS	0.189215	0.250424	4.97214	8.27797	SHBG
niclosamide PC3 UP	0.190237	0.250811	4.94212	8.20137	ICAM1
arachidonic acid CTD 00007139	0.190237	0.250811	4.94212	8.20137	APOE
diphenylpyraline BOSS	0.190237	0.250811	4.94212	8.20137	ICAM1
Coxistac CTD 00000539	0.191258	0.251835	4.91245	8.12585	GAS6
quercetin CTD 00006679	0.191682	0.25184	1.68545	2.78422	PLAU;ARG1;HEXB;APOE;SHBG;ICAM1
Copper sulfate CTD 00007279	0.19175	0.25184	1.55056	2.56085	RET;TGFBR3;WWOX;MANBA;PLAU;ARG1;GSS;TGFBI;IL6R;ICAM1
pyrvinium MCF7 UP	0.192277	0.252211	4.88314	8.0514	PLAU
5109870 MCF7 UP	0.193296	0.253225	4.85417	7.97799	PLAU
hydroquinone CTD 00001535	0.194313	0.254234	4.82554	7.90561	GSS
astemizole MCF7 UP	0.195329	0.254594	4.79724	7.83424	ICAM1
MG-132 CTD 00002789	0.195329	0.254594	4.79724	7.83424	ICAM1
COBALT CTD 00005696	0.195329	0.254594	4.79724	7.83424	APOE
ambroxol PC3 UP	0.197357	0.256912	4.74162	7.69443	ERAP1
ciclopirox HL60 UP	0.19938	0.259219	4.68726	7.55842	ICAM1
digoxigenin HL60 DOWN	0.199977	0.259668	2.5448	4.09599	PLAU;PAM
scriptaid PC3 UP	0.200893	0.260529	2.53684	4.07159	TGFBR3;MANBA
GEMCITABINE HYDROCHLORIDE BOSS	0.201398	0.260856	4.63413	7.42607	ICAM1
testosterone CTD 00006844	0.202154	0.261503	2.05324	3.28256	ARG1;GAS6;SHBG
4-aminobutyric acid BOSS	0.202405	0.261503	4.60801	7.36122	SHBG
hemin BOSS	0.203411	0.26213	4.58218	7.29723	ICAM1
hydrogen sulfide BOSS	0.203411	0.26213	4.58218	7.29723	ICAM1
(-)-isoprenaline HL60 UP	0.204416	0.26213	4.55663	7.2341	MANBA
calmidazolium MCF7 UP	0.204416	0.26213	4.55663	7.2341	TGFBI
clomipramine PC3 UP	0.204416	0.26213	4.55663	7.2341	ICAM1
methotrexate BOSS	0.204416	0.26213	4.55663	7.2341	IL6R
glycerol BOSS	0.20542	0.262418	4.53136	7.17179	SHBG
Velcade(Bortezomib) BOSS	0.20542	0.262418	4.53136	7.17179	PLAU
KW-2449 Kinome Scan	0.206422	0.262418	4.50638	7.11031	RET
terfenadine MCF7 UP	0.206422	0.262418	4.50638	7.11031	ICAM1
ellagic acid BOSS	0.206422	0.262418	4.50638	7.11031	ICAM1
ZEARALENONE CTD 00007008	0.206422	0.262418	4.50638	7.11031	APOE
Melatonin BOSS	0.206422	0.262418	4.50638	7.11031	ICAM1
Sunitinib Kinome Scan	0.207423	0.263042	4.48166	7.04962	RET
IRON BOSS	0.207423	0.263042	4.48166	7.04962	ICAM1
methane BOSS	0.208423	0.26331	4.45721	6.98973	ICAM1
L-alanine BOSS	0.208423	0.26331	4.45721	6.98973	SHBG
L-cysteine BOSS	0.208423	0.26331	4.45721	6.98973	ICAM1
Sunitinib FDA	0.209422	0.26331	4.43302	6.9306	RET
liothyronine BOSS	0.209422	0.26331	4.43302	6.9306	SHBG
ZINC BOSS	0.209422	0.26331	4.43302	6.9306	ICAM1
Hydrogen BOSS	0.209422	0.26331	4.43302	6.9306	ICAM1
cicloheximide HL60 DOWN	0.210089	0.263827	2.4599	3.838	RET;PAM
NICKEL CTD 00006389	0.211416	0.26517	4.38542	6.81462	ICAM1
ciglitazone CTD 00001835	0.212411	0.265725	4.36199	6.75774	ICAM1
L-glutamic acid BOSS	0.212411	0.265725	4.36199	6.75774	SHBG
streptozocin BOSS	0.213405	0.265725	4.33882	6.70158	ICAM1
formaldehyde BOSS	0.213405	0.265725	4.33882	6.70158	SHBG
trimethoprim BOSS	0.213405	0.265725	4.33882	6.70158	ICAM1
serine BOSS	0.213405	0.265725	4.33882	6.70158	PLAU
1-Phosphatidyl-myo-inositol BOSS	0.214398	0.266318	4.31588	6.64613	ICAM1
Phetharbital BOSS	0.214398	0.266318	4.31588	6.64613	PLAU
ethisterone BOSS	0.215389	0.266906	4.29319	6.59137	ICAM1
DICHLOROMETHANE BOSS	0.215389	0.266906	4.29319	6.59137	SHBG
R406 LINCS	0.216379	0.267491	4.27073	6.53729	RET
Aizen uranine BOSS	0.216379	0.267491	4.27073	6.53729	ICAM1
valproic acid HL60 DOWN	0.217368	0.268392	4.2485	6.48389	IL6R
R-atenolol PC3 UP	0.218356	0.268827	4.2265	6.43115	SVEP1
thioridazine PC3 UP	0.218356	0.268827	4.2265	6.43115	ICAM1
azacyclonol HL60 DOWN	0.218872	0.268827	2.39087	3.63238	HEXB;IL6R
Staurosporine, Streptomyces sp. RBC	0.219343	0.268827	4.20472	6.37906	RET
fulvestrant MCF7 DOWN	0.219343	0.268827	4.20472	6.37906	RET
tamoxifen BOSS	0.219343	0.268827	4.20472	6.37906	SHBG
cyclophosphamide BOSS	0.220329	0.268827	4.18316	6.3276	IL6R
rapamycin BOSS	0.220329	0.268827	4.18316	6.3276	PLAU
Acid red 87 BOSS	0.220329	0.268827	4.18316	6.3276	ICAM1
Bisulfite BOSS	0.220329	0.268827	4.18316	6.3276	ICAM1
Bosutinib	0.221313	0.26939	4.16183	6.27677	RET
alprazolam BOSS	0.221313	0.26939	4.16183	6.27677	PLAU
Fonofos CTD 00005884	0.223046	0.271142	2.35946	3.54009	RET;PAM
L-thyroxine BOSS	0.223278	0.271142	4.11979	6.17696	SHBG
Capsaicin BOSS	0.224259	0.271592	4.09909	6.12795	PLAU
dexamethasone BOSS	0.224259	0.271592	4.09909	6.12795	ICAM1
TERBUFOS CTD 00000658	0.224439	0.271592	2.34917	3.51001	RET;PAM
R406 Kinome Scan	0.225238	0.271829	4.07859	6.07953	RET
Pentadecafluorooctanoic acid CTD 00001078	0.225238	0.271829	4.07859	6.07953	APOE
anisomycin MCF7 UP	0.225833	0.271829	2.33896	3.48028	PLAU;ICAM1
TAE-684 Kinome Scan	0.226217	0.271829	4.05829	6.03168	RET
HG-14-10-04 LINCS	0.226217	0.271829	4.05829	6.03168	RET
monobenzone PC3 DOWN	0.226217	0.271829	4.05829	6.03168	PLAU
BX-912 LINCS	0.22817	0.273539	4.01829	5.93769	RET
Capsaicin CTD 00005570	0.22817	0.273539	4.01829	5.93769	PLAU
dimethyl sulfoxide CTD 00005842	0.229145	0.274388	3.99858	5.89152	ICAM1
2,2',4,4',5,5'-Hexachlorobiphenyl CTD 00000731	0.230118	0.275235	3.97907	5.84589	ICAM1
glibenclamide HL60 DOWN	0.23063	0.275526	1.91165	2.80429	HEXB;IL6R;PAM
Cube root extract CTD 00006707	0.233032	0.278074	3.92163	5.71216	ICAM1
TERT-BUTYL HYDROPEROXIDE CTD 00007349	0.233323	0.278099	1.89941	2.76427	APOE;PAM;ICAM1
NVP-TAE684 LINCS	0.234001	0.278586	3.90284	5.6686	RET
MANGANESE CTD 00006240	0.234969	0.278772	3.88424	5.62555	ARG1
PARAQUAT CTD 00006471	0.234969	0.278772	3.88424	5.62555	ICAM1
LUCANTHONE CTD 00006227	0.234969	0.278772	3.88424	5.62555	ICAM1
Mustard gas CTD 00006356	0.235936	0.279597	3.86581	5.58298	IL6R
doxorubicin CTD 00005874	0.24075	0.284649	2.23518	3.18289	PLAU;ERAP1
dexibuprofen PC3 DOWN	0.240751	0.284649	3.77619	5.37726	PLAU
camptothecin MCF7 UP	0.243626	0.287719	3.72436	5.25924	PLAU
EINECS 250-892-2 CTD 00001193	0.244582	0.288188	3.70739	5.22077	PLAU
parthenolide MCF7 UP	0.244582	0.288188	3.70739	5.22077	IL6R
resveratrol BOSS	0.246491	0.290105	3.67392	5.14507	ICAM1
SARIN CTD 00006722	0.250294	0.294246	3.60874	4.99852	APOE
levonorgestrel HL60 UP	0.252189	0.296136	3.57699	4.92758	SVEP1
parathion CTD 00006472	0.25292	0.296571	2.15717	2.96543	RET;PAM
Retinoic acid BOSS	0.253135	0.296571	3.56133	4.89267	ICAM1
diethylstilbestrol CTD 00005818	0.254079	0.297339	3.5458	4.85813	APOE
1-NITROPYRENE CTD 00001569	0.255023	0.298105	3.5304	4.82395	ICAM1
Prestwick-983 HL60 DOWN	0.256906	0.299627	3.5	4.75666	RET
spiperone PC3 UP	0.256906	0.299627	3.5	4.75666	ICAM1
OTSSP167 LINCS	0.257846	0.300383	3.48499	4.72353	RET
8-HYDROXYQUINOLINE CTD 00007045	0.259723	0.302158	3.45536	4.65831	ARG1
LEAD CTD 00006203	0.259955	0.302158	2.11451	2.84876	APOE;TGFBI
tolnaftate PC3 DOWN	0.260659	0.302635	3.44073	4.6262	ERAP1
puromycin MCF7 UP	0.262529	0.30412	3.41183	4.56296	ICAM1
1-chloro-2,4-dinitrobenzene CTD 00005848	0.262529	0.30412	3.41183	4.56296	ICAM1
quinpirole HL60 UP	0.265325	0.307014	3.36936	4.47048	MANBA
cephaeline MCF7 UP	0.269346	0.311318	2.06008	2.70233	PLAU;ICAM1
HEMATOXYLIN BOSS	0.270886	0.312748	3.2875	4.29366	ICAM1
Retinoic acid CTD 00006918	0.272158	0.313864	1.43846	1.87197	RET;PLAU;NCAN;SVEP1;APOE;TGFBI;ICAM1
TPEN CTD 00001994	0.272731	0.314174	3.26108	4.23702	IL6R
AZD7762 LINCS	0.273652	0.314883	3.24802	4.20911	RET
minoxidil PC3 DOWN	0.274571	0.315237	3.23507	4.18147	ERAP1
mitoxantrone CTD 00006345	0.274571	0.315237	3.23507	4.18147	ERAP1
curcumin BOSS	0.276407	0.316992	3.20947	4.127	ICAM1
Sunitinib	0.277324	0.31769	3.19682	4.10015	RET
zuclopenthixol PC3 DOWN	0.279153	0.31943	3.17181	4.04722	ERAP1
ascorbic acid CTD 00005445	0.280066	0.320119	3.15946	4.02114	ICAM1
PD 98059 CTD 00003206	0.280978	0.320451	3.14719	3.9953	ICAM1
piperlongumine MCF7 DOWN	0.280978	0.320451	3.14719	3.9953	RET
Premarin CTD 00005926	0.283706	0.323206	3.11095	3.91923	RET
picrotoxinin PC3 UP	0.284614	0.323882	3.09906	3.89434	IL6R
CEP-701 Kinome Scan	0.290035	0.329687	3.02952	3.7498	RET
captopril PC3 DOWN	0.290491	0.329842	1.94695	2.40678	PLAU;IL6R
VITAMIN E CTD 00006994	0.29151	0.330274	1.67111	2.05995	TGFBI;PAM;ICAM1
2-Nonenal, 4-hydroxy-, (2E,4R)- CTD 00001295	0.291833	0.330274	3.00702	3.70337	IL6R
puromycin HL60 UP	0.291833	0.330274	3.00702	3.70337	FCGR2A
melphalan CTD 00006262	0.29631	0.334973	2.95219	3.59089	ICAM1
cyclophosphamide CTD 00005734	0.297202	0.335613	2.94146	3.569	PLAU
Zinc sulfate CTD 00007264	0.303416	0.342256	2.86844	3.42105	ICAM1
chlortetracycline HL60 UP	0.305182	0.343871	2.84823	3.38042	NCAN
chlorhexidine PC3 UP	0.3087	0.346704	2.80865	3.30124	NCAN
luteolin HL60 DOWN	0.3087	0.346704	2.80865	3.30124	PAM
SELENIUM CTD 00006731	0.308705	0.346704	1.61419	1.89727	TGFBR3;APOE;PAM
digoxigenin PC3 UP	0.311328	0.34927	2.77966	3.24361	IL6R
podophyllotoxin HL60 UP	0.320018	0.358629	2.68716	3.06169	FCGR2A
Fulvestrant CTD 00002740	0.323464	0.362097	2.65183	2.99304	GAS6
ETHYL METHANESULFONATE CTD 00005938	0.327144	0.36582	1.45589	1.62675	FCRLB;WWOX;GSS;PAM
Staurosporine Kinome Scan	0.327749	0.366099	2.60894	2.9103	RET
MG-262 PC3 UP	0.332007	0.370454	2.5674	2.83081	ICAM1
8-azaguanine PC3 UP	0.33455	0.372887	2.54309	2.78461	ICAM1
cycloheximide CTD 00005731	0.335395	0.373023	2.53509	2.76945	ICAM1
helveticoside PC3 UP	0.335395	0.373023	2.53509	2.76945	IL6R
pregnenolone PC3 DOWN	0.33624	0.373559	2.52713	2.7544	ERAP1
thapsigargin PC3 DOWN	0.339607	0.376894	2.49581	2.69539	TGFBR3
menadione HL60 UP	0.343793	0.380419	2.45771	2.62413	ICAM1
mifepristone CTD 00007083	0.343793	0.380419	2.45771	2.62413	ICAM1
amikacin PC3 DOWN	0.344628	0.380419	2.45022	2.6102	PLAU
cyclopenthiazide PC3 UP	0.344628	0.380419	2.45022	2.6102	IL6R
indomethacin CTD 00006147	0.344628	0.380419	2.45022	2.6102	PLAU
lobeline HL60 UP	0.348783	0.384594	2.41347	2.54212	RET
METHYL METHANESULFONATE CTD 00006307	0.350124	0.38566	1.31923	1.38449	FCRLB;WWOX;MANBA;GSS;IL6R;PAM
atovaquone MCF7 DOWN	0.360285	0.396429	2.3161	2.36441	RET
vorinostat PC3 DOWN	0.361099	0.396901	2.30944	2.3524	PLAU
MG-262 PC3 DOWN	0.365154	0.400931	2.27669	2.29362	PLAU
diltiazem PC3 DOWN	0.368381	0.404043	2.25115	2.24808	PLAU
glibenclamide HL60 UP	0.369988	0.405054	2.23858	2.22579	NCAN
diazinon CTD 00005790	0.370088	0.405054	1.60764	1.59801	ICAM5;GAS6
scopolamine PC3 DOWN	0.371592	0.406268	2.22616	2.20381	ERAP1
minoxidil PC3 UP	0.373989	0.408457	2.20777	2.1714	SVEP1
sanguinarine MCF7 DOWN	0.377966	0.412363	2.17778	2.11887	RET
daunorubicin PC3 DOWN	0.381919	0.416235	2.14857	2.0681	PLAU
apigenin HL60 DOWN	0.393632	0.428548	2.0654	1.92565	ARG1
danazol HL60 UP	0.395178	0.429777	2.05479	1.9077	NCAN
NICKEL CHLORIDE CTD 00001064	0.395949	0.430162	2.04952	1.89882	ICAM1
Methaneseleninic acid CTD 00000412	0.398258	0.43148	2.03387	1.8725	TGFBR3
Dronabinol CTD 00006853	0.398258	0.43148	2.03387	1.8725	ICAM1
cyclosporin A CTD 00007121	0.398418	0.43148	1.22341	1.12585	TGFBR3;MANBA;ARG1;ERAP1;APOE;IL6R;ICAM1
lanatoside C PC3 UP	0.405132	0.438291	1.98831	1.79652	IL6R
trichostatin A PC3 UP	0.408163	0.440999	1.9687	1.76413	TGFBR3
ouabain PC3 UP	0.408919	0.440999	1.96386	1.75615	IL6R
vorinostat PC3 UP	0.408919	0.440999	1.96386	1.75615	TGFBR3
paclitaxel PC3 DOWN	0.409673	0.441351	1.95903	1.74823	PLAU
digitoxigenin HL60 UP	0.412682	0.444129	1.93998	1.71703	TGFBR3
Vorinostat CTD 00003560	0.415677	0.446885	1.92129	1.6866	ICAM1
phenobarbital CTD 00006510	0.416214	0.446996	1.45426	1.27475	GAS6;ICAM1
diclofenac CTD 00005804	0.417168	0.447555	1.91207	1.67166	ICAM1
trichostatin A PC3 DOWN	0.417993	0.447974	1.44881	1.26379	PLAU;IL6R
carmustine CTD 00005595	0.418656	0.448219	1.90294	1.6569	ICAM5
menadione CTD 00007386	0.421102	0.45037	1.43937	1.24488	WWOX;PAM
CADMIUM CTD 00005555	0.421989	0.450851	1.43669	1.23954	VIT;HEXB
digoxin MCF7 DOWN	0.433336	0.462495	1.81613	1.51872	RET
hydrogen peroxide CTD 00006118	0.43402	0.462745	1.23506	1.03086	WWOX;ARG1;GSS;ICAM1
digoxin HL60 DOWN	0.435508	0.463852	1.80377	1.49937	PLAU
scopolamine PC3 UP	0.436951	0.464908	1.79562	1.48666	SVEP1
pregnenolone PC3 UP	0.43839	0.465959	1.78755	1.47409	SVEP1
etoposide CTD 00005948	0.441973	0.469284	1.76766	1.44331	PLAU
latamoxef HL60 UP	0.445697	0.472751	1.36778	1.10533	ARG1;SVEP1
calcitriol CTD 00005558	0.448631	0.475374	1.25692	1.00749	RET;ARG1;SVEP1
azacitidine MCF7 DOWN	0.456784	0.483516	1.68867	1.32315	RET
digoxin PC3 UP	0.45748	0.483756	1.68508	1.31777	IL6R
cicloheximide HL60 UP	0.458869	0.484727	1.67794	1.3071	FCGR2A
danazol HL60 DOWN	0.461661	0.487177	1.32406	1.0234	HEXB;IL6R
vorinostat MCF7 DOWN	0.463704	0.488833	1.65343	1.27068	RET
paclitaxel CTD 00007144	0.464391	0.489057	1.64998	1.26558	ICAM1
vincristine CTD 00006988	0.466786	0.491078	1.31043	0.998398	TGFBR3;ICAM1
3-(1-methylpyrrolidin-2-yl)pyridine CTD 00006393	0.468497	0.492375	1.6296	1.23561	PLAU
lycorine PC3 UP	0.474599	0.498281	1.59993	1.19241	IL6R
primaquine PC3 DOWN	0.492505	0.516554	1.51693	1.07437	ERAP1
fisetin PC3 DOWN	0.496404	0.51976	1.49961	1.05028	PLAU
metronidazole PC3 UP	0.49657	0.51976	1.23493	0.864489	CRTAM;APOE
lanatoside C HL60 DOWN	0.510455	0.533751	1.43928	0.967848	PLAU
Disodium selenite CTD 00007229	0.518569	0.541686	1.18275	0.77669	GAS6;ICAM1
sulfaguanidine PC3 DOWN	0.522901	0.545659	1.38839	0.900179	ERAP1
4-Hydroxytamoxifen CTD 00000850	0.524742	0.547026	1.38105	0.890571	RET
trichostatin A MCF7 DOWN	0.525965	0.547747	1.37621	0.884241	RET
azacitidine PC3 DOWN	0.530223	0.551624	1.3595	0.862544	PLAU
etifenin PC3 DOWN	0.538628	0.559804	1.32723	0.8212	IL6R
sulpiride PC3 DOWN	0.543366	0.56416	1.30946	0.798732	PLAU
proscillaridin HL60 DOWN	0.545131	0.565422	1.30291	0.790513	PLAU
ambroxol PC3 DOWN	0.546304	0.566069	1.29858	0.785095	PLAU
amiodarone CTD 00005381	0.548057	0.567316	1.29213	0.777057	ICAM1
neostigmine bromide PC3 DOWN	0.562421	0.581601	1.24076	0.714059	PLAU
8-Bromo-cAMP, Na CTD 00007044	0.563551	0.582186	1.23682	0.709309	ERAP1
lobeline HL60 DOWN	0.572803	0.591151	1.06487	0.593361	HEXB;IL6R
scriptaid MCF7 DOWN	0.573596	0.591378	1.20242	0.668339	RET
formaldehyde CTD 00006001	0.581672	0.599105	1.00299	0.543467	WWOX;GSS;PAM;ICAM1
scriptaid PC3 DOWN	0.585572	0.602519	1.16281	0.622296	PLAU
digitoxigenin PC3 DOWN	0.586644	0.603021	1.15933	0.618314	ERAP1
puromycin PC3 DOWN	0.601383	0.617471	1.11269	0.56583	PLAU
digitoxigenin HL60 DOWN	0.6019	0.617471	1.11109	0.564062	PLAU
zalcitabine PC3 DOWN	0.603447	0.618443	1.10632	0.558801	ERAP1
acetaminophen CTD 00005295	0.611932	0.626516	0.95914	0.471067	MANBA;HEXB;TGFBI;IL6R;ICAM1
medrysone HL60 DOWN	0.62058	0.63474	1.0549	0.503292	IL6R
hydralazine CTD 00006108	0.628395	0.642096	1.03226	0.479573	ICAM1
Vitinoin CTD 00007069	0.630324	0.64343	1.02674	0.473864	APOE
Caspan CTD 00000180	0.643563	0.656294	0.989674	0.436184	APOE
lycorine HL60 UP	0.667822	0.68036	0.92499	0.37345	PLAU
trichostatin A MCF7 UP	0.672993	0.684951	0.911703	0.361053	MANBA
Demecolcine CTD 00005762	0.673847	0.685145	0.909524	0.359036	ICAM1
Bortezomib CTD 00003736	0.674699	0.685335	0.907355	0.357033	ICAM1
0179445-0000 MCF7 DOWN	0.688456	0.69862	0.87294	0.325872	RET
POTASSIUM CHROMATE CTD 00001284	0.70048	0.710123	0.829643	0.295344	TGFBR3;TGFBI
cimetidine PC3 DOWN	0.705158	0.713462	0.832589	0.290852	TGFBI
67526-95-8 CTD 00007263	0.705158	0.713462	0.832589	0.290852	RET
Enterolactone CTD 00001393	0.712049	0.719728	0.816366	0.277244	RET
irinotecan PC3 DOWN	0.722463	0.729539	0.792293	0.257565	PLAU
anisomycin HL60 UP	0.770254	0.777037	0.687774	0.179533	PLAU
Bisphenol A CTD 00000312	0.804163	0.810452	0.618358	0.134773	WWOX
irinotecan MCF7 DOWN	0.806761	0.812276	0.613165	0.131664	RET
chlorzoxazone HL60 DOWN	0.810342	0.815086	0.606031	0.127447	HEXB
camptothecin PC3 DOWN	0.856603	0.860777	0.515796	0.0798355	TGFBR3
latamoxef HL60 DOWN	0.872028	0.875424	0.486102	0.0665639	GSS
clindamycin HL60 DOWN	0.880113	0.882682	0.470513	0.0600866	HEXB
COUMESTROL CTD 00005717	0.907054	0.908817	0.417909	0.0407684	RET
0175029-0000 PC3 DOWN	0.936661	0.93757	0.435594	0.0285027	PLAU;IL6R
atrazine CTD 00005450	0.982019	0.982019	0.23885	0.00433372	HEXB
