# Supplementary figures and images for: Potential Therapeutic Targets for Type 2 Diabetes: A Multi-Center Data Analysis Based on Proteomics
Source: Research Square preprint supplement (doi:10.21203/rs.3.rs-5897046/v1), 2025-01-29

Supplementary material


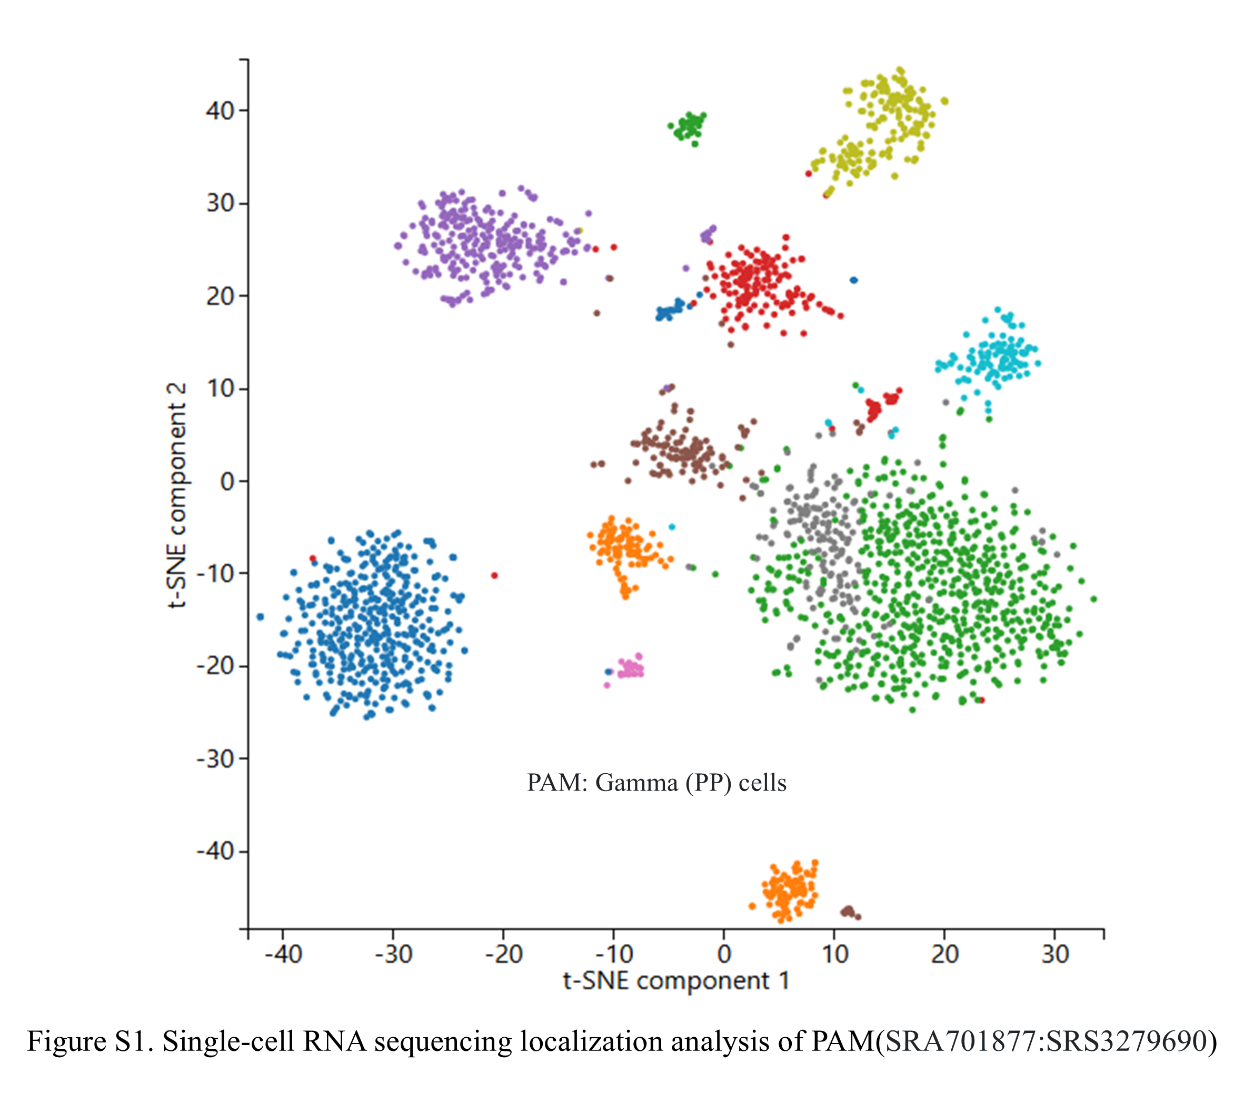


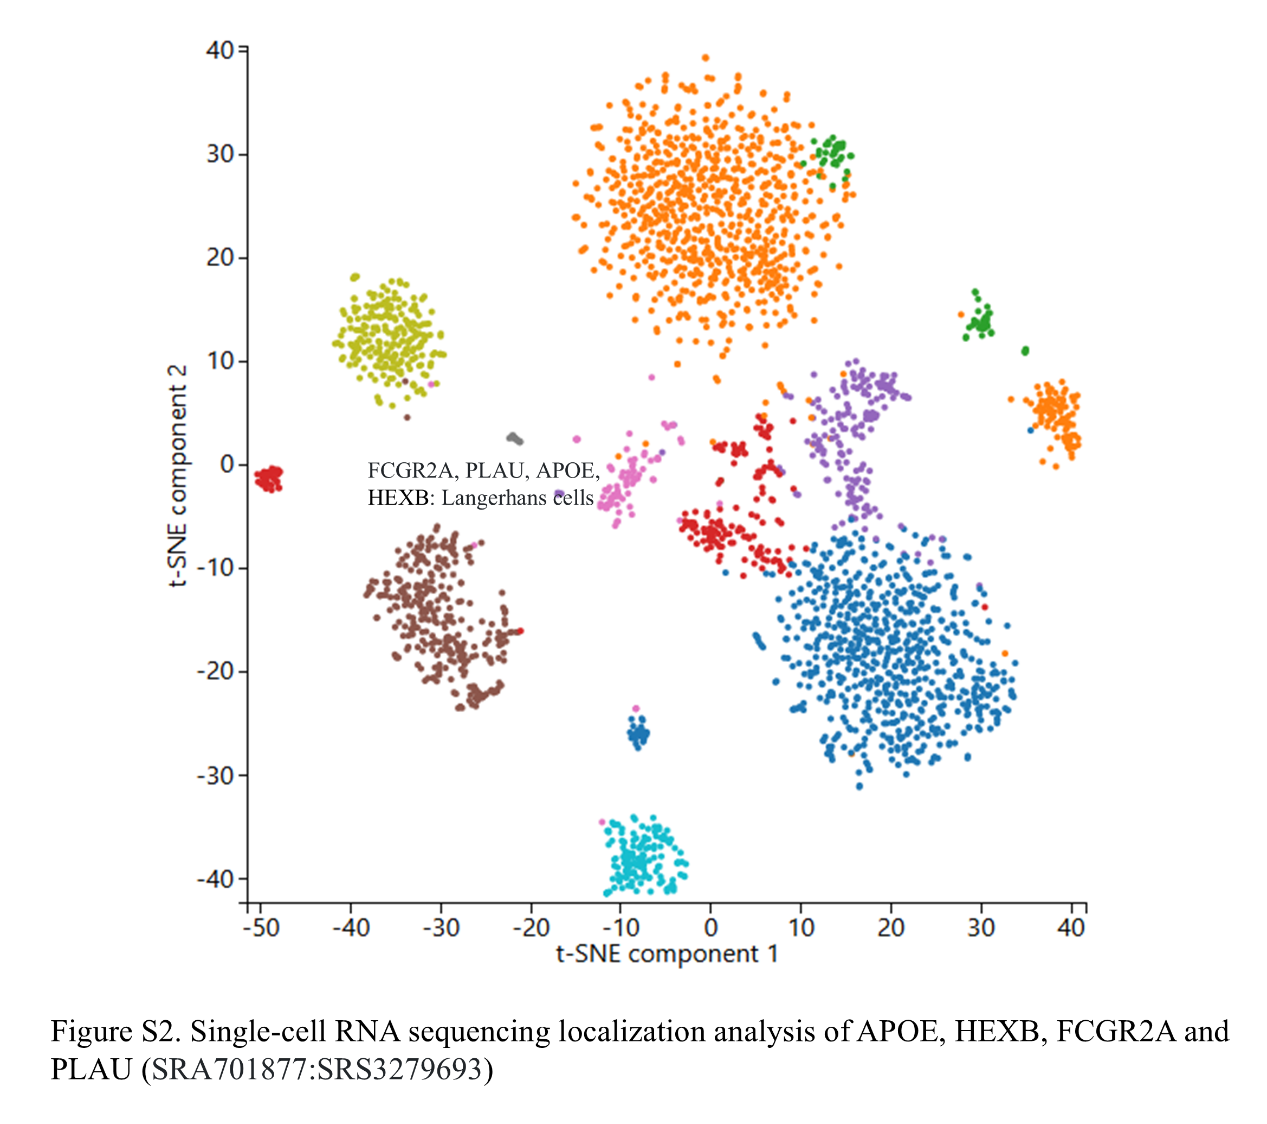


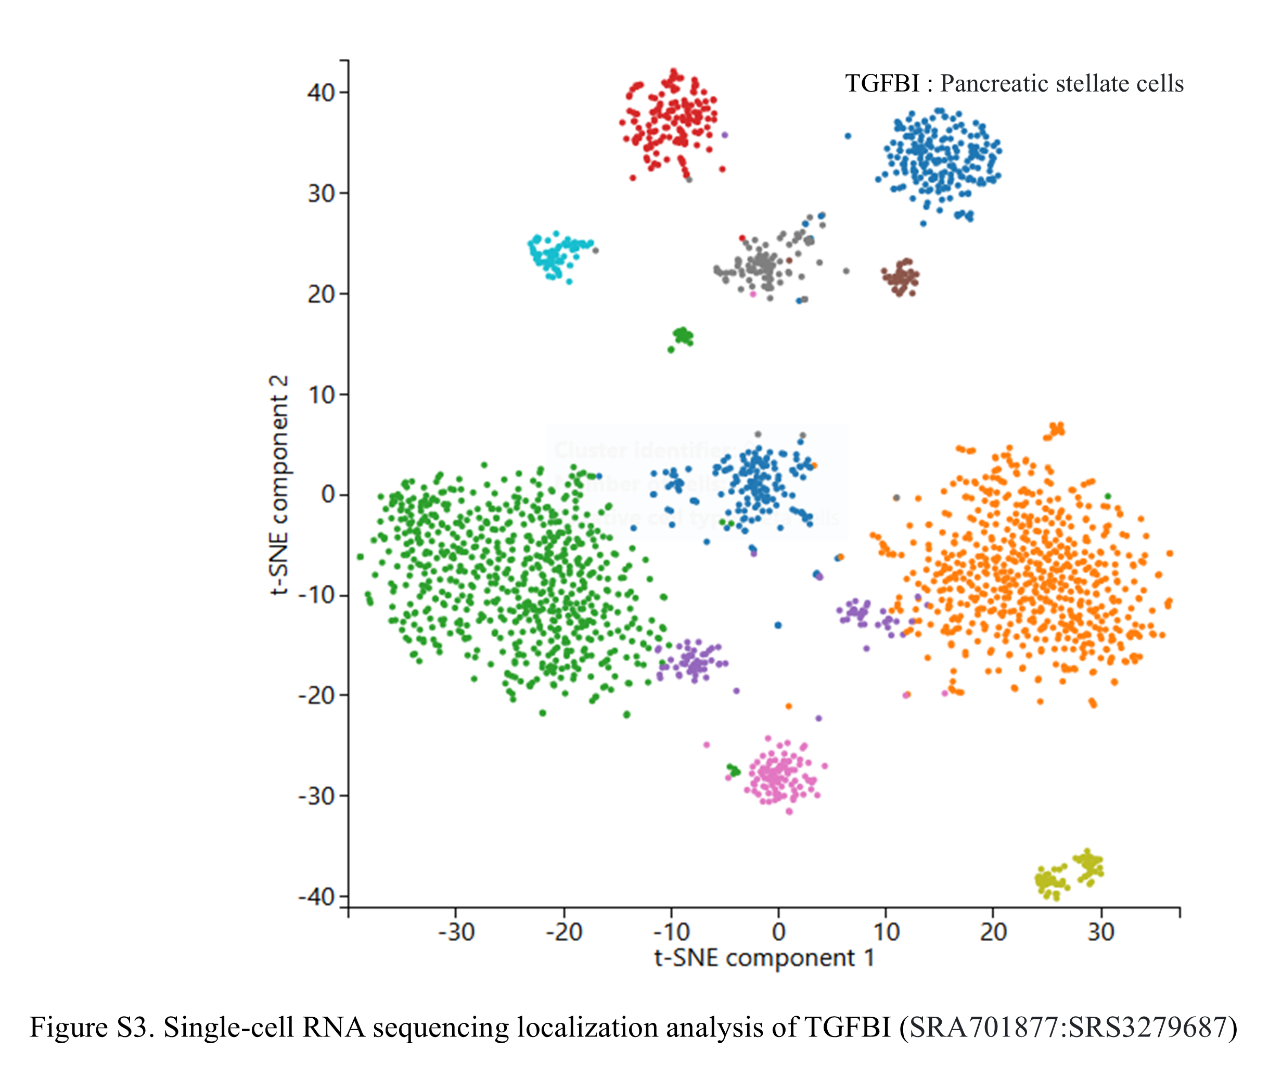

Supplement: Supplementary file 2 [file 2de6b12dbc9417cc6cf7cd80.docx]
